# Supplementary material for: Immunoglobulin A carries sulfated and O-acetylated N-glycans primarily at the tailpiece site – strategies for site-specific N-glycan identification
Source: Front Mol Biosci. 2025 Aug 1;12:1595173. doi: 10.3389/fmolb.2025.1595173 (PMC12353717; doi:10.3389/fmolb.2025.1595173)
Supplement: Supplementary file 2 [file DataSheet1.xlsx]

## Sheet: Outline
Immunoglobulin A Carries Sulfated and O-acetylated N-glycans Primarily at the Tailpiece site Frania J. Zuniga-Banuelos 1,2, Greta Lemke 1,3, Marcus Hoffmann 1, Udo Reichl 1,3, Erdmann Rapp 1,2,* 1 Bioprocess Engineering, Max Planck Institute for Dynamics of Complex Technical Systems, Magdeburg, Germany 2 glyXera GmbH, Magdeburg, Germany 3 Bioprocess Engineering, Otto von Guericke University Magde…
	Supplementary Tables
	Supplementary Table 1.			Parameters set for (N-glyco-)proteomic search on the human serum IgA samples from supplier 1 and supplier 2 performed through Byonic.
	Supplementary Table 2.			Reported N-glycans bearing a sulfated-sugar and O-acetylated NeuAc in human IgA.
	Supplementary Table 3.			(N-glyco-)proteomic analysis of human serum IgA from supplier 1 and supplier 2.
	Supplementary Table 4.			Proteomic analysis from human serum IgA samples from supplier 1 and supplier 2 performed by Proteome Discoverer.
	Supplementary Table 5.			Relative abundance of IgA1 and IgA2 heavy chain constant regions by supplier sample.
	Supplementary Table 6.			Micro-heterogeneity of N-glycosylation in homologous sites of human IgA subclasses analyzed in sample from supplier 1.
	Supplementary Table 7.			Micro-heterogeneity of N-glycosylation in homologous sites of human IgA subclasses analyzed in sample from supplier 2.
	Supplementary Table 8.			Micro-heterogeneity of N-glycosylation in unique sites of human IgA2 analyzed in sample from supplier 1.
	Supplementary Table 9.			Micro-heterogeneity of N-glycosylation in unique sites of human IgA2 analyzed in sample from supplier 2.
	Supplementary Table 10.			Dedicated (N-glyco-)proteomic analysis of sulfated N-glycans (with and without HexNAc-sulfated oxonium ions) in human serum IgA from two suppliers.
	Supplementary Table 11.			Relative quantification of sulfated N-glycans in homologous sites of human IgA subclasses identified with and without HexNAc-sulfated oxonium ions in two commercial human serum IgA samples.

## Sheet: sT1. Searches both suppliers
		Supplementary Table 1. Parameters set for (N-Glyco-)proteomic search on the unfractionated human serum IgA samples from supplier 1 and supplier 2 performed through Byonic.
Raw files: All HCD.step mesurements of HILIC-fractions derived from the IgA sample from supplier 1	Search	Byologic file identifier	Protein database	Digestion cleavage	Max. number of missed cleavages	Glycan database (expanded databases attached below)	Fixed and variable modifications		Protein FDR/ decoys	MS/MS filtering
	Proteomic	Proteomic search supplier 1	UniProt KB Homo sapiens June 2022	R/K fully specific	2	none	Fixed modification: C, carbamidomethyl 1 common modification: N, Q deamidation	2 rare modification: M, W oxidation; M, W dioxidation	1%FDR, adding decoys	none
	Glycoproteomic	N-Glycoproteomic search supplier 1	Proteomic search supplier 1	R/K fully specific	2	Common N-glycans in blood plasma (see below)	Fixed modification: C, carbamidomethyl 2 common modification: NGlycan; N, Q deamidation	2 rare modification: M, W oxidation; M, W dioxidation	1%FDR, adding decoys	HexNAc [H+] / 204.087, HexNAcHex [H+] / 366.139; 2 required; m/z tolerance 0.2; Rank cutoff 50
	Identification of N-glycopeptides harboring modified N-glycans	N-Glycans with HexNAc sulfation	Proteomic search supplier 1	R/K fully specific	2	Sulfated N-glycans (see below)	Fixed modification: C, carbamidomethyl 2 common modification: N, Q deamidation; Nglycan	2 rare modification: M, W oxidation; M, W dioxidation	1%FDR, adding decoys	HexNAc [H+] / 204.087, HexNAcHex [H+] / 366.139, HexNAcHexSulfo [H+] / 446.096, HexNAcSulfo [H+] / 284.043; 3 required; m/z tolerance 0.005; Rank cutoff 0
		N-Glycans with glucuronic acid	Proteomic search supplier 1	R/K fully specific	2	Glucuronidated N-glycans (see below)	Fixed modification: C, carbamidomethyl 2 common modification: NGlycan; N, Q deamidation	2 rare modification: M, W oxidation; M, W dioxidation	1%FDR, adding decoys	HexNAc [H+] / 204.087, HexNAcHex [H+] / 366.139, HexNAcHexHexA [H+] / 542.1716; 3 required; m/z tolerance 0.004; Rank cutoff 0
		N-Glycans with O‑acetylated sialic acid	Proteomic search supplier 1	R/K fully specific	2	Acetylated N-glycans (see below)	Fixed modification: C, carbamidomethyl 2 common modification: NGlycan; N, Q deamidation	2 rare modification: M, W oxidation; M, W dioxidation	1%FDR, adding decoys	HexNAc [H+] / 204.087, HexNAcHex [H+] / 366.139, AcetylNeuAc [-H2O +H+] / 316.1012, HexNAcHexAcetylNeuAc [H+] / 699.2452; 3 required; m/z tolerance 0.004; Rank cutoff 0
	Identification of N-glycopeptides with a truncated IgA tailpiece	Common N-glycans	IgA1 and IgA2 Tailpiece	R/K semi-specific C-ragged	2	Common N-glycans in blood plasma (see below)	Fixed modification: C, carbamidomethyl 2 common modification: NGlycan; N, Q deamidation	2 rare modification: M, W oxidation; M, W dioxidation	1%FDR, adding decoys	HexNAc [H+] / 204.087, HexNAcHex [H+] / 366.139; 2 required; m/z tolerance 0.2; Rank cutoff 50
		N-Glycans with HexNAc sulfation	IgA1 and IgA2 Tailpiece	R/K semi-specific C-ragged	2	Sulfated N-glycans (see below)	Fixed modification: C, carbamidomethyl 2 common modification: NGlycan; N, Q deamidation	2 rare modification: M, W, H oxidation; M, W dioxidation	1%FDR, adding decoys	HexNAc [H+] / 204.087, HexNAcHex [H+] / 366.139, HexNAcHexSulfo [H+] / 446.096, HexNAcSulfo [H+] / 284.043; 3 required; m/z tolerance 0.005; Rank cutoff 0
		N-Glycans with glucuronic acid	IgA1 and IgA2 Tailpiece	R/K semi-specific C-ragged	2	Glucuronidated N-glycans (see below)	Fixed modification: C, carbamidomethyl 2 common modification: NGlycan; N, Q deamidation	2 rare modification: M, W oxidation; M, W dioxidation	1%FDR, adding decoys	HexNAc [H+] / 204.087, HexNAcHex [H+] / 366.139, HexNAcHexHexA [H+] / 542.1716; 3 required; m/z tolerance 0.004; Rank cutoff 0
		N-Glycans with O‑acetylated sialic acid	IgA1 and IgA2 Tailpiece	R/K semi-specific C-ragged	2	Acetylated N-glycans (see below)	Fixed modification: C, carbamidomethyl 2 common modification: NGlycan; N, Q deamidation	2 rare modification: M, W oxidation; M, W dioxidation	1%FDR, adding decoys	HexNAc [H+] / 204.087, HexNAcHex [H+] / 366.139, AcetylNeuAc [-H2O +H+] / 316.102, HexNAcHexAcetylNeuAc [H+] / 699.245; 3 required; m/z tolerance 0.004; Rank cutoff 0
Raw files: All HCD.step mesurements of HILIC-fractions derived from the IgA sample from supplier 2	Search	Byologic file identifier	Protein database	Digestion cleavage	Digestion cleavage	Glycan database (expanded databases attached below)	Authorized modifications		Protein FDR/ decoys	MS/MS filtering
	Proteomic	Proteomic search supplier 1	UniProt KB Homo sapiens June 2022	R/K fully specific	2	none	Fixed modification: C, carbamidomethyl 1 common modification: N, Q deamidation	2 rare modification: M, W oxidation; M, W dioxidation	1%FDR, adding decoys	none
	Glycoproteomic	N-Glycoproteomic search supplier 1	Proteomic search supplier 1	R/K fully specific	2	Common N-glycans in blood plasma (see below)	Fixed modification: C, carbamidomethyl 2 common modification: NGlycan; N, Q deamidation	2 rare modification: M, W oxidation; M, W dioxidation	1%FDR, adding decoys	HexNAc [H+] / 204.087, HexNAcHex [H+] / 366.139; 2 required; m/z tolerance 0.2; Rank cutoff 50
	Identification of N-glycopeptides harboring modified N-glycans	N-Glycans with HexNAc sulfation	Proteomic search supplier 1	R/K fully specific	2	Sulfated N-glycans (see below)	Fixed modification: C, carbamidomethyl 2 common modification: N, Q deamidation; Nglycan	2 rare modification: M, W oxidation; M, W dioxidation	1%FDR, adding decoys	HexNAc [H+] / 204.087, HexNAcHex [H+] / 366.139, HexNAcHexSulfo [H+] / 446.096, HexNAcSulfo [H+] / 284.043; 3 required; m/z tolerance 0.005; Rank cutoff 0
		N-Glycans with glucuronic acid	Proteomic search supplier 1	R/K fully specific	2	Glucuronidated N-glycans (see below)	Fixed modification: C, carbamidomethyl 2 common modification: NGlycan; N, Q deamidation	2 rare modification: M, W oxidation; M, W dioxidation	1%FDR, adding decoys	HexNAc [H+] / 204.087, HexNAcHex [H+] / 366.139, HexNAcHexHexA [H+] / 542.1716; 3 required; m/z tolerance 0.004; Rank cutoff 0
		N-Glycans with O‑acetylated sialic acid	Proteomic search supplier 1	R/K fully specific	2	Acetylated N-glycans (see below)	Fixed modification: C, carbamidomethyl 2 common modification: NGlycan; N, Q deamidation	2 rare modification: M, W oxidation; M, W dioxidation	1%FDR, adding decoys	HexNAc [H+] / 204.087, HexNAcHex [H+] / 366.139, AcetylNeuAc [-H2O +H+] / 316.1012, HexNAcHexAcetylNeuAc [H+] / 699.2452; 3 required; m/z tolerance 0.004; Rank cutoff 0
	Identification of N-glycopeptides with a truncated IgA tailpiece	Common N-glycans	IgA1 and IgA2 Tailpiece	R/K semi-specific C-ragged	2	Common N-glycans in blood plasma (see below)	Fixed modification: C, carbamidomethyl 2 common modification: NGlycan; N, Q deamidation	2 rare modification: M, W oxidation; M, W dioxidation	1%FDR, adding decoys	HexNAc [H+] / 204.087, HexNAcHex [H+] / 366.139; 2 required; m/z tolerance 0.2; Rank cutoff 50
		N-Glycans with HexNAc sulfation	IgA1 and IgA2 Tailpiece	R/K semi-specific C-ragged	2	Sulfated N-glycans (see below)	Fixed modification: C, carbamidomethyl 2 common modification: NGlycan; N, Q deamidation	2 rare modification: M, W, H oxidation; M, W dioxidation	1%FDR, adding decoys	HexNAc [H+] / 204.087, HexNAcHex [H+] / 366.139, HexNAcHexSulfo [H+] / 446.096, HexNAcSulfo [H+] / 284.043; 3 required; m/z tolerance 0.005; Rank cutoff 0
		N-Glycans with glucuronic acid	IgA1 and IgA2 Tailpiece	R/K semi-specific C-ragged	2	Glucuronidated N-glycans (see below)	Fixed modification: C, carbamidomethyl 2 common modification: NGlycan; N, Q deamidation	2 rare modification: M, W oxidation; M, W dioxidation	1%FDR, adding decoys	HexNAc [H+] / 204.087, HexNAcHex [H+] / 366.139, HexNAcHexHexA [H+] / 542.1716; 3 required; m/z tolerance 0.004; Rank cutoff 0
		N-Glycans with O‑acetylated sialic acid	IgA1 and IgA2 Tailpiece	R/K semi-specific C-ragged	2	Acetylated N-glycans (see below)	Fixed modification: C, carbamidomethyl 2 common modification: NGlycan; N, Q deamidation	2 rare modification: M, W oxidation; M, W dioxidation	1%FDR, adding decoys	HexNAc [H+] / 204.087, HexNAcHex [H+] / 366.139, AcetylNeuAc [-H2O +H+] / 316.102, HexNAcHexAcetylNeuAc [H+] / 699.245; 3 required; m/z tolerance 0.004; Rank cutoff 0
					Common N-glycans in blood plasma list
					1	HexNAc(4)Hex(4)NeuAc(2)	NGlycan	common1
					2	HexNAc(4)Hex(5)NeuAc(2)	NGlycan	common1
					3	HexNAc(2)Hex(5)	NGlycan	common1
					4	HexNAc(4)Hex(5)NeuAc(1)	NGlycan	common1
					5	HexNAc(4)Hex(5)Fuc(1)NeuAc(1)	NGlycan	common1
					6	HexNAc(4)Hex(5)Fuc(1)NeuAc(2)	NGlycan	common1
					7	HexNAc(5)Hex(6)NeuAc(2)	NGlycan	common1
					8	HexNAc(5)Hex(6)Fuc(1)NeuAc(2)	NGlycan	common1
					9	HexNAc(4)Hex(6)NeuAc(1)	NGlycan	common1
					10	HexNAc(4)Hex(6)Fuc(2)NeuAc(1)	NGlycan	common1
					11	HexNAc(5)Hex(6)NeuAc(3)	NGlycan	common1
					12	HexNAc(4)Hex(5)Fuc(2)NeuAc(1)	NGlycan	common1
					13	HexNAc(4)Hex(5)Fuc(3)NeuAc(1)	NGlycan	common1
					14	HexNAc(3)Hex(4)	NGlycan	common1
					15	HexNAc(4)Hex(5)	NGlycan	common1
					16	HexNAc(5)Hex(6)Fuc(1)NeuAc(1)	NGlycan	common1
					17	HexNAc(6)Hex(7)Fuc(1)NeuAc(4)	NGlycan	common1
					18	HexNAc(5)Hex(6)Fuc(1)NeuAc(3)	NGlycan	common1
					19	HexNAc(5)Hex(4)NeuAc(2)	NGlycan	common1
					20	HexNAc(5)Hex(4)Fuc(2)NeuAc(1)	NGlycan	common1
					21	HexNAc(3)Hex(4)NeuAc(1)	NGlycan	common1
					22	HexNAc(4)Hex(4)NeuAc(1)	NGlycan	common1
					23	HexNAc(5)Hex(6)NeuAc(1)	NGlycan	common1
					24	HexNAc(5)Hex(6)Fuc(2)NeuAc(1)	NGlycan	common1
					25	HexNAc(6)Hex(9)NeuAc(1)	NGlycan	common1
					26	HexNAc(2)Hex(6)	NGlycan	common1
					27	HexNAc(5)Hex(6)Fuc(3)NeuAc(2)	NGlycan	common1
					28	HexNAc(7)Hex(8)NeuAc(1)	NGlycan	common1
					29	HexNAc(3)Hex(7)NeuAc(1)Phospho(1)	NGlycan	common1
					30	HexNAc(4)Hex(4)Fuc(1)NeuAc(2)	NGlycan	common1
					31	HexNAc(5)Hex(6)	NGlycan	common1
					32	HexNAc(4)Hex(5)Fuc(2)NeuAc(2)	NGlycan	common1
					33	HexNAc(5)Hex(6)Fuc(2)NeuAc(2)	NGlycan	common1
					34	HexNAc(6)Hex(7)NeuAc(2)	NGlycan	common1
					35	HexNAc(6)Hex(7)NeuAc(3)	NGlycan	common1
					36	HexNAc(5)Hex(6)Fuc(3)NeuAc(3)	NGlycan	common1
					37	HexNAc(6)Hex(7)	NGlycan	common1
					38	HexNAc(6)Hex(7)NeuAc(1)	NGlycan	common1
					39	HexNAc(2)Hex(9)	NGlycan	common1
					40	HexNAc(5)Hex(6)Fuc(2)NeuAc(3)	NGlycan	common1
					41	HexNAc(4)Hex(6)Fuc(1)NeuAc(1)	NGlycan	common1
					42	HexNAc(2)Hex(7)	NGlycan	common1
					43	HexNAc(6)Hex(7)Fuc(1)	NGlycan	common1
					44	HexNAc(5)Hex(5)NeuAc(2)	NGlycan	common1
					45	HexNAc(3)Hex(5)NeuAc(1)	NGlycan	common1
					46	HexNAc(4)Hex(5)Fuc(1)	NGlycan	common1
					47	HexNAc(5)Hex(5)Fuc(1)	NGlycan	common1
					48	HexNAc(5)Hex(5)Fuc(1)NeuAc(1)	NGlycan	common1
					49	HexNAc(3)Hex(3)Fuc(1)	NGlycan	common1
					50	HexNAc(4)Hex(3)Fuc(1)	NGlycan	common1
					51	HexNAc(4)Hex(4)Fuc(1)	NGlycan	common1
					52	HexNAc(5)Hex(3)Fuc(1)	NGlycan	common1
					53	HexNAc(5)Hex(4)Fuc(1)	NGlycan	common1
					54	HexNAc(4)Hex(4)Fuc(1)NeuAc(1)	NGlycan	common1
					55	HexNAc(6)Hex(7)Fuc(3)NeuAc(3)	NGlycan	common1
					56	HexNAc(6)Hex(8)NeuAc(1)	NGlycan	common1
					57	HexNAc(3)Hex(7)Phospho(1)	NGlycan	common1
					58	HexNAc(5)Hex(6)Fuc(4)NeuAc(1)	NGlycan	common1
					59	HexNAc(4)Hex(11)NeuAc(1)	NGlycan	common1
					60	HexNAc(6)Hex(7)Fuc(3)NeuAc(2)	NGlycan	common1
					61	HexNAc(6)Hex(7)Fuc(2)NeuAc(3)	NGlycan	common1
					62	HexNAc(4)Hex(5)Fuc(2)	NGlycan	common1
					63	HexNAc(6)Hex(7)NeuAc(4)	NGlycan	common1
					64	HexNAc(6)Hex(7)Fuc(2)NeuAc(4)	NGlycan	common1
					65	HexNAc(5)Hex(6)Fuc(4)NeuAc(2)	NGlycan	common1
					66	HexNAc(5)Hex(5)Fuc(1)NeuAc(2)	NGlycan	common1
					67	HexNAc(5)Hex(8)	NGlycan	common1
					68	HexNAc(5)Hex(7)Fuc(1)NeuAc(1)	NGlycan	common1
					69	HexNAc(6)Hex(4)	NGlycan	common1
					70	HexNAc(6)Hex(7)Fuc(2)NeuAc(1)	NGlycan	common1
					71	HexNAc(5)Hex(8)Fuc(1)	NGlycan	common1
					72	HexNAc(5)Hex(5)Fuc(2)NeuAc(1)	NGlycan	common1
					73	HexNAc(5)Hex(5)NeuAc(1)	NGlycan	common1
					74	HexNAc(5)Hex(7)Fuc(1)NeuAc(2)	NGlycan	common1
					75	HexNAc(2)Hex(10)	NGlycan	common1
					76	HexNAc(7)Hex(7)Fuc(1)NeuAc(2)	NGlycan	common1
					77	HexNAc(6)Hex(7)Fuc(1)NeuAc(3)	NGlycan	common1
					78	HexNAc(3)Hex(6)NeuAc(1)	NGlycan	common1
					79	HexNAc(6)Hex(7)Fuc(1)NeuAc(1)	NGlycan	common1
					80	HexNAc(3)Hex(6)	NGlycan	common1
					81	HexNAc(7)Hex(3)	NGlycan	common1
					82	HexNAc(5)Hex(6)Fuc(3)NeuAc(1)	NGlycan	common1
					83	HexNAc(5)Hex(7)Fuc(2)NeuAc(2)	NGlycan	common1
					84	HexNAc(6)Hex(7)Fuc(3)NeuAc(4)	NGlycan	common1
					85	HexNAc(6)Hex(4)NeuAc(1)	NGlycan	common1
					86	HexNAc(4)Hex(7)NeuAc(1)	NGlycan	common1
					87	HexNAc(2)Hex(4)	NGlycan	common1
					88	HexNAc(5)Hex(5)	NGlycan	common1
					89	HexNAc(3)Hex(4)Fuc(2)NeuAc(1)	NGlycan	common1
					90	HexNAc(6)Hex(5)	NGlycan	common1
					91	HexNAc(5)Hex(3)Fuc(2)NeuAc(1)	NGlycan	common1
					92	HexNAc(3)Hex(3)Fuc(3)NeuAc(1)	NGlycan	common1
					93	HexNAc(2)Hex(6)Phospho(1)	NGlycan	common1
					94	HexNAc(6)Hex(4)NeuAc(1)Phospho(1)	NGlycan	common1
					95	HexNAc(8)Hex(9)Fuc(2)NeuAc(4)	NGlycan	common1
					96	HexNAc(6)Hex(3)Fuc(2)NeuAc(2)	NGlycan	common1
					Sulfated N-glycan list
					1	HexNAc(4)Hex(5)Fuc(1)NeuAc(2)Sulfo(1)	NGlycan	common1
					2	HexNAc(4)Hex(5)Fuc(1)NeuAc(1)Sulfo(1)	NGlycan	common1
					3	HexNAc(4)Hex(5)Fuc(1)NeuAc(2)Sulfo(2)	NGlycan	common1
					4	HexNAc(4)Hex(5)NeuAc(2)Sulfo(1)	NGlycan	common1
					5	HexNAc(4)Hex(5)NeuAc(1)Sulfo(1)	NGlycan	common1
					6	HexNAc(5)Hex(5)Fuc(1)NeuAc(2)Sulfo(1)	NGlycan	common1
					7	HexNAc(4)Hex(6)Fuc(2)NeuAc(1)Sulfo(1)	NGlycan	common1
					8	HexNAc(4)Hex(6)NeuAc(2)Sulfo(1)	NGlycan	common1
					9	HexNAc(4)Hex(5)Fuc(3)NeuAc(1)Sulfo(2)	NGlycan	common1
					Glucuronidated N-glycan list
					1	HexNAc(4)Hex(5)HexA(1)NeuAc(1)	NGlycan	common1
					2	HexNAc(4)Hex(5)Fuc(1)HexA(1)NeuAc(1)	NGlycan	common1
					3	HexNAc(4)Hex(6)HexA(1)NeuAc(1)	NGlycan	common1
					4	HexNAc(5)Hex(6)HexA(1)NeuAc(2)	NGlycan	common1
					5	HexNAc(5)Hex(6)Fuc(1)HexA(1)NeuAc(2)	NGlycan	common1
					6	HexNAc(4)Hex(5)HexA(1)NeuAc(1)Sulfo(1)	NGlycan	common1
					7	HexNAc(4)Hex(5)Fuc(1)HexA(1)NeuAc(1)Sulfo(1)	NGlycan	common1
					8	HexNAc(5)Hex(6)HexA(1)NeuAc(2)Sulfo(1)	NGlycan	common1
					9	HexNAc(5)Hex(6)Fuc(1)HexA(1)NeuAc(2)Sulfo(1)	NGlycan	common1
					10	HexNAc(6)Hex(7)HexA(1)NeuAc(2)	NGlycan	common1
					11	HexNAc(4)Hex(8)HexA(1)NeuAc(2)	NGlycan	common1
					Acetylated N-glycan list
					1	HexNAc(4)Hex(5)Fuc(1)NeuAc(2)Ac(1)	NGlycan	common1
					2	HexNAc(4)Hex(5)Fuc(1)NeuAc(2)Ac(1)Sulfo(1)	NGlycan	common1
					3	HexNAc(5)Hex(5)Fuc(1)NeuAc(2)Ac(1)	NGlycan	common1
					4	HexNAc(5)Hex(5)Fuc(1)NeuAc(1)Ac(1)	NGlycan	common1

## Sheet: sT2. Reported N-glycans
		Supplementary Table 2. Reported N-glycans bearing a sulfated-sugar and O-acetylated NeuAc in human IgA. Asterisk (*) refers to N-glycan compositions found in our study and in the reference site.
	Sulfated N-glycan compositions	Observed in this study	Evidence reported in GlyConnect (1)
		Evidence	Evidence	Protein	Website
1	HexNAc(5)Hex(5)Fuc(1)NeuAc(2)Ac(1)	NeuAc-Acetylation	Not reported	-	-
2	HexNAc(4)Hex(5)Fuc(1)NeuAc(1)Ac(1)	NeuAc-Acetylation	Not reported
3	HexNAc(4)Hex(5)Fuc(1)NeuAc(2)Ac(1)*	NeuAc-Acetylation	NeuAc-Acetylation	IgA1 heavy chain	https://glyconnect.expasy.org/browser/proteins/230
4	HexNAc(4)Hex(5)Fuc(1)NeuAc(2)Ac(1)Sulfo(1)	GlcNAc sulfation	Not reported	-	-
5	HexNAc(4)Hex(5)Fuc(1)NeuAc(2)Sulfo(2)	GlcNAc sulfation	Not reported	-	-
6	HexNAc(5)Hex(5)Fuc(1)NeuAc(2)Sulfo(1)	GlcNAc sulfation	Not reported	-	-
7	HexNAc(4)Hex(5)Fuc(1)NeuAc(2)Sulfo(1)*	GlcNAc sulfation	Gal sulfation	IgA1 and IgA2 heavy chain	https://glyconnect.expasy.org/browser/proteins/230
8	HexNAc(4)Hex(5)Fuc(1)NeuAc(1)Sulfo(1)*	GlcNAc sulfation	Gal sulfation	IgA1 heavy chain	https://glyconnect.expasy.org/browser/proteins/230
9	HexNAc(4)Hex(5)NeuAc(2)Sulfo(1)*	GlcNAc sulfation	Gal sulfation	IgA2 heavy chain	https://glyconnect.expasy.org/browser/proteins/647
10	HexNAc(4)Hex(5)NeuAc(1)Sulfo(1)	GlcNAc sulfation	Not reported	-	-
11	HexNAc(4)Hex(6)Fuc(2)NeuAc(1)Sulfo(1)	GlcNAc sulfation	Not reported	-	-
12	HexNAc(4)Hex(5)Sulfo(1)	Not observed	GlcNAc sulfation	IgA1 heavy chain	https://glyconnect.expasy.org/browser/proteins/230
	References:
	[preprint] Alagesan, K., Silva, D. V., Seeberger, P. H., and Kolarich, D. (2019) A novel, ultrasensitive approach for quantitative carbohydrate composition and linkage analysis using LC-ESI ion trap tandem mass spectrometry. bioRxiv. 10.1101/853036
	GlyConnect. N-glycan structures from Immunoglobulin heavy constant alpha 1. https://glyconnect.expasy.org/browser/proteins/230. 2019 (Accessed Jan 20)
	GlyConnect. N-glycan structures from Immunoglobulin heavy constant alpha 2. https://glyconnect.expasy.org/browser/proteins/647. 2019 (Accessed Jan 20)
	Alocci, D., Mariethoz, J., Gastaldello, A., Gasteiger, E., Karlsson, N. G., Kolarich, D., Packer, N. H., and Lisacek, F. (2019) GlyConnect: Glycoproteomics Goes Visual, Interactive, and Analytical. J. Proteome. Res. 18, 664-677, 10.1021/acs.jproteome.8b00766
	Expasy. GlyConnect. https://glyconnect.expasy.org/. 2019 (Accessed 01.08.2022)

## Sheet: sT3. Glycoproteomics Suppliers
		Supplemetary Table 3. (N-glyco-)proteomic analysis of human serum IgA from two suppliers. HCD.step MS/MS measurements from all HILIC-fractions (Depletion, Elution 1, Elution 2) derived from four technical replicates were analyzed. N-glycopeptide identifications were manually validated. Supplier 1:SA, Supplier 2:AR
Row#	PID	Scan Time(s)_x000D_ (Posit)	Scan Number(s)_x000D_ (Posit)	Protein_x000D_ name	Accession number	Mod._x000D_ AAs	Var. Pos._x000D_ Protein	N-glyco site	Sequence	Glycans	Validate	Labels	Comment	Supplier	Replicate	Obs.M	Mod._x000D_ Names	Quant_x000D_ level	MS_x000D_ Alias name	Score	PEP_x000D_ 2D	XIC_x000D_ AUC	iso	Apex Time_x000D_ (Posit)	z	Var. Pos._x000D_ Peptide	Start_x000D_ AA	End_x000D_ AA	PEP_x000D_ 1D	Delta_x000D_ Score	Delta Mod._x000D_ Score	Obs._x000D_ m/z	Calc._x000D_ m/z	ppm	Off-_x000D_ By-X	Calc.M	MS_x000D_ Id	Apex Int._x000D_ (Posit)	Obs. time_x000D_ Var (min)	MS Id - MS/MS Query	Glycans query
1	84219; 100465; 117523; 133232	23.4600; 23.4100; 23.2100; 23.0000	6281; 7151; 7257; 6477	sp|P26927|HGFL_HUMAN Hepatocyte growth factor-like protein OS=Homo sapiens OX=9606 GN=MST1 PE=1 SV=2	P26927	N,Q,W	72,79,83	72	R.AFHYnVSSHGCqLLPwTQHSPHTR.L	HexNAc(3)Hex(4)	Uncertain			AR	a	4133.7721; 4133.7730; 4133.7741; 4133.7717	NGlycan/1257.4494; Deamidated/0.9840; Oxidation/15.9949	2	a_hIgA-AR-GLTrFASP-FZpipHILIC_8mAbs_E2_step.raw_20240829_noglyc_spec_cut; b_hIgA-AR-GLTrFASP-FZpipHILIC_11mAbs_E2_step.raw_20240829_noglyc_spec_cut; c_hIgA-AR-GLTrFASP-FZpipHILIC_16mAbs_E2_step.raw_20240829_noglyc_spec_cut; d_hIgA-AR-GLTrFASP-FZpipHILIC_16mAbs_E2_step.raw_20240829_noglyc_spec_cut	142.15	9.40e-01 - 1.00e+00		0	22.95 - 23.45	4	5,12,16	68	91	9.89e-01 - 1.00e+00	13.9 - 68.2	0.0 - 3.1	1034.4503; 1034.4505; 1034.4508; 1034.4502	1034.45	0.63; 0.85; 1.09; 0.53	-1	4133.77	14; 17; 20; 23	5.027e+05 - 1.319e+06	22.95 - 23.45	14; 17; 20; 23-6281	HexNAc(3)Hex(4)
1.1	84219	23.4600	6281	sp|P26927|HGFL_HUMAN Hepatocyte growth factor-like protein OS=Homo sapiens OX=9606 GN=MST1 PE=1 SV=2	P26927	N,Q,W	72,79,83	72	R.AFHYnVSSHGCqLLPwTQHSPHTR.L	HexNAc(3)Hex(4)	Uncertain			AR	a	4133.7721	NGlycan/1257.4494; Deamidated/0.9840; Oxidation/15.9949	1	a_hIgA-AR-GLTrFASP-FZpipHILIC_8mAbs_E2_step.raw_20240829_noglyc_spec_cut	108.84	1	4910000	0	23.45	4	5,12,16	68	91	1	59.8	0.0	1034.4503	1034.45	0.63	-1	4133.77	14	9.3e+05	23.45	14-6281	HexNAc(3)Hex(4)
1.2	100465	23.4100	7151	sp|P26927|HGFL_HUMAN Hepatocyte growth factor-like protein OS=Homo sapiens OX=9606 GN=MST1 PE=1 SV=2	P26927	N,Q,W	72,79,83	72	R.AFHYnVSSHGCqLLPwTQHSPHTR.L	HexNAc(3)Hex(4)	Uncertain			AR	b	4133.7730	NGlycan/1257.4494; Deamidated/0.9840; Oxidation/15.9949	1	b_hIgA-AR-GLTrFASP-FZpipHILIC_11mAbs_E2_step.raw_20240829_noglyc_spec_cut	142.15	0.94	2720000	0	23.25	4	5,12,16	68	91	0.99	68.2	3.1	1034.4505	1034.45	0.85	-1	4133.77	17	1.32e+06	23.25	17-7151	HexNAc(3)Hex(4)
1.3	117523	23.2100	7257	sp|P26927|HGFL_HUMAN Hepatocyte growth factor-like protein OS=Homo sapiens OX=9606 GN=MST1 PE=1 SV=2	P26927	N,Q,W	72,79,83	72	R.AFHYnVSSHGCqLLPwTQHSPHTR.L	HexNAc(3)Hex(4)	Uncertain			AR	c	4133.7741	NGlycan/1257.4494; Deamidated/0.9840; Oxidation/15.9949	1	c_hIgA-AR-GLTrFASP-FZpipHILIC_16mAbs_E2_step.raw_20240829_noglyc_spec_cut	115.08	1	2050000	0	23.15	4	5,12,16	68	91	1	63.2	0.4	1034.4508	1034.45	1.09	-1	4133.77	20	5.03e+05	23.15	20-7257	HexNAc(3)Hex(4)
1.4	133232	23.0000	6477	sp|P26927|HGFL_HUMAN Hepatocyte growth factor-like protein OS=Homo sapiens OX=9606 GN=MST1 PE=1 SV=2	P26927	N,Q,W	72,79,83	72	R.AFHYnVSSHGCqLLPwTQHSPHTR.L	HexNAc(3)Hex(4)	Uncertain			AR	d	4133.7717	NGlycan/1257.4494; Deamidated/0.9840; Oxidation/15.9949	1	d_hIgA-AR-GLTrFASP-FZpipHILIC_16mAbs_E2_step.raw_20240829_noglyc_spec_cut	118.42	1	3290000	0	22.95	4	5,12,16	68	91	1	13.9	0.0	1034.4502	1034.45	0.53	-1	4133.77	23	7.1e+05	22.95	23-6477	HexNAc(3)Hex(4)
2	100464; 100466	23.4000; 23.4500	7144; 7163	sp|P26927|HGFL_HUMAN Hepatocyte growth factor-like protein OS=Homo sapiens OX=9606 GN=MST1 PE=1 SV=2	P26927	N,W,Q	72,83,85	72	R.AFHYnVSSHGCQLLPwTqHSPHTR.L	HexNAc(3)Hex(4)	Uncertain			AR	b	4133.7750; 4133.7750	NGlycan/1257.4494; Oxidation/15.9949; Deamidated/0.9840	2	b_hIgA-AR-GLTrFASP-FZpipHILIC_11mAbs_E2_step.raw_20240829_noglyc_spec_cut	122.86	7.87e-01 - 9.67e-01	2720000	0	23.25	4	5,16,18	68	91	9.57e-01 - 9.94e-01	6.4 - 50.0	0.0	1034.4510; 1034.4510	1034.45	1.31; 1.32	-1	4133.77	17	1.32e+06	23.25	17-7144	HexNAc(3)Hex(4)
2.1.2	100466	23.4500	7163	sp|P26927|HGFL_HUMAN Hepatocyte growth factor-like protein OS=Homo sapiens OX=9606 GN=MST1 PE=1 SV=2	P26927	N,W,Q	72,83,85	72	R.AFHYnVSSHGCQLLPwTqHSPHTR.L	HexNAc(3)Hex(4)	Uncertain			AR	b	4133.7750	NGlycan/1257.4494; Oxidation/15.9949; Deamidated/0.9840	0	b_hIgA-AR-GLTrFASP-FZpipHILIC_11mAbs_E2_step.raw_20240829_noglyc_spec_cut	102.22	0.79	2720000	0	23.25	4	5,16,18	68	91	0.96	6.4	0.0	1034.4510	1034.45	1.32	-1	4133.77	17	1.32e+06	23.25	17-7163	HexNAc(3)Hex(4)
3	6567; 19038; 26232; 38862; 46120; 65684; 77212; 88835; 104924; 120994; 137968	47.2000; 47.2500; 47.1600; 47.2100; 47.1700; 46.3500; 46.3400; 46.3600; 46.3900	15365; 17483; 15813; 17639; 15884; 16249; 16602; 14746; 15602; 15715; 15146	sp|P01877|IGHA2_HUMAN Immunoglobulin heavy constant alpha 2_tailpiece.peptide	P01877	N	9	327	M.AGKPTHInVSVVM.A	HexNAc(5)Hex(5)NeuAc(1)	Uncertain			SA	a	3468.4970; 3468.4947; 3468.4936; 3468.4958; 3468.4948; 3468.4933; 3468.4959; 3468.4956; 3468.4974; 3468.4908; 3468.4963	NGlycan/2116.7564	2	a_hIgA-SA-GLTrFASP-FZpipHILIC_E2_step.raw_20240829_noglyc_spec_cut; b_hIgA-SA-GLTrFASP-FZpipHILIC_E1_step.raw_20240829_noglyc_spec_cut; b_hIgA-SA-GLTrFASP-FZpipHILIC_E2_step.raw_20240829_noglyc_spec_cut; c_hIgA-SA-GLTrFASP-FZpipHILIC_E1_step.raw_20240829_noglyc_spec_cut; c_hIgA-SA-GLTrFASP-FZpipHILIC_E2_step.raw_20240829_noglyc_spec_cut; d_hIgA-SA-GLTrFASP-FZpipHILIC_E2_step.raw_20240829_noglyc_s…	109.89	6.94e-04 - 8.51e-01		2	46.33 - 47.19	3	8	2	14	7.26e-04 - 8.56e-01	8.0 - 37.2	8.0 - 37.2	1157.1729; 1157.1722; 1157.1718; 1157.1725; 1157.1722; 1157.1717; 1157.1726; 1157.1725; 1157.1731; 1157.1709; 1157.1727	1157.17	3.56; 2.91; 2.59; 3.23; 2.93; 2.51; 3.25; 3.16; 3.69; 1.79; 3.37	0	3468.48	1; 3; 4; 6; 7; 10; 12; 14; 17; 20; 23	1.540e+05 - 2.137e+06	46.33 - 47.19	1; 3; 4; 6; 7; 10; 12; 14; 17; 20; 23-15365	HexNAc(5)Hex(5)NeuAc(1)
3.1	26232	47.1600	15813	sp|P01877|IGHA2_HUMAN Immunoglobulin heavy constant alpha 2_tailpiece.peptide	P01877	N	9	327	M.AGKPTHInVSVVM.A	HexNAc(5)Hex(5)NeuAc(1)	Uncertain			SA	b	3468.4936	NGlycan/2116.7564	1	b_hIgA-SA-GLTrFASP-FZpipHILIC_E2_step.raw_20240829_noglyc_spec_cut	109.89	0.0088	4320000	2	47.18	3	8	2	14	0.0092	37.2	37.2	1157.1718	1157.17	2.59	0	3468.48	4	6.39e+05	47.18	4-15813	HexNAc(5)Hex(5)NeuAc(1)
4	6193; 25831; 45731; 65409	42.1100; 42.0000; 42.0400	13534; 13970; 14036; 14341	sp|P01877|IGHA2_HUMAN Immunoglobulin heavy constant alpha 2_tailpiece.peptide	P01877	N	9	327	M.AGKPTHInVSVVMAE.A	HexNAc(5)Hex(5)Fuc(1)NeuAc(1)	Uncertain			SA	a	3814.6298; 3814.6305; 3814.6283; 3814.6277	NGlycan/2262.8143	2	a_hIgA-SA-GLTrFASP-FZpipHILIC_E2_step.raw_20240829_noglyc_spec_cut; b_hIgA-SA-GLTrFASP-FZpipHILIC_E2_step.raw_20240829_noglyc_spec_cut; c_hIgA-SA-GLTrFASP-FZpipHILIC_E2_step.raw_20240829_noglyc_spec_cut; d_hIgA-SA-GLTrFASP-FZpipHILIC_E2_step.raw_20240829_noglyc_spec_cut	129.62	1.34e-03 - 2.58e-01		2	42.02 - 42.18	3	8	2	16	1.40e-03 - 2.66e-01	30.0 - 129.6	30.0 - 129.6	1272.5505; 1272.5508; 1272.5501; 1272.5499	1272.55	1.98; 2.18; 1.60; 1.45	0	3814.62	1; 4; 7; 10	4.463e+05 - 1.152e+06	42.02 - 42.18	1; 4; 7; 10-13534	HexNAc(5)Hex(5)Fuc(1)NeuAc(1)
4.1	6193	42.1100	13534	sp|P01877|IGHA2_HUMAN Immunoglobulin heavy constant alpha 2_tailpiece.peptide	P01877	N	9	327	M.AGKPTHInVSVVMAE.A	HexNAc(5)Hex(5)Fuc(1)NeuAc(1)	Uncertain			SA	a	3814.6298	NGlycan/2262.8143	1	a_hIgA-SA-GLTrFASP-FZpipHILIC_E2_step.raw_20240829_noglyc_spec_cut	129.62	0.0066	8940000	2	42.18	3	8	2	16	0.0069	129.6	129.6	1272.5505	1272.55	1.98	0	3814.62	1	8.31e+05	42.18	1-13534	HexNAc(5)Hex(5)Fuc(1)NeuAc(1)
4.2	65409	42.0400	14341	sp|P01877|IGHA2_HUMAN Immunoglobulin heavy constant alpha 2_tailpiece.peptide	P01877	N	9	327	M.AGKPTHInVSVVMAE.A	HexNAc(5)Hex(5)Fuc(1)NeuAc(1)	Uncertain			SA	d	3814.6277	NGlycan/2262.8143	1	d_hIgA-SA-GLTrFASP-FZpipHILIC_E2_step.raw_20240829_noglyc_spec_cut	103.33	0.0013	10600000	2	42.02	3	8	2	16	0.0014	103.3	103.3	1272.5499	1272.55	1.45	0	3814.62	10	1.15e+06	42.02	10-14341	HexNAc(5)Hex(5)Fuc(1)NeuAc(1)
5	6491; 6524; 6538; 6540; 6601; 12128; 19019; 19032; 19093; 26135; 26160; 26193; 26206; 26235; 26246; 26400; 26409; 31752; 38831; 38931; 46024; 46042; 46080; 46108; 46121; 46126; 46180; 51296; 57946; 57967; 57969; 58075; 65622; 65651; 65658; 65674; 65728; 65753; 65782; 71141; 77180; 77201; 77273; 77279; 88770; 88795; 93730; 104854; 104879; 107315; 120959; 120974; 126216; 137877; 137914; 143658	46.0700; 46.3400; 46.5900; 46.6400; 47.7700; 46.1600; 46.3500; 53.8200; 45.7700; 46.0500; 46.3200; 46.6100; 47.1800; 47.4800; 55.7000; 55.9200; 46.1300; 46.0800; 54.0700; 45.8500; 46.0300; 46.3100; 46.8900; 47.1700; 47.4500; 53.9000; 46.1500; 46.3700; 46.4000; 55.5700; 46.0600; 46.3800; 46.6900; 46.9700; 47.8400; 53.5400; 54.1500; 46.1900; 53.9900; 54.1800; 45.2900; 45.5700; 45.4200; 45.6000; 45.…	14955; 15055; 15145; 15164; 15568; 16816; 17026; 17134; 19873; 15316; 15415; 15515; 15617; 15820; 15928; 18831; 18906; 16626; 17205; 20111; 15481; 15582; 15787; 15885; 15986; 18210; 16520; 17225; 17336; 17347; 20447; 15835; 15954; 16073; 16176; 16489; 18506; 18722; 16988; 16163; 16267; 19067; 19134; 14376; 14470; 14964; 15244; 15348; 15040; 15447; 15127; 14788; 14878; 15218	sp|P01877|IGHA2_HUMAN Immunoglobulin heavy constant alpha 2_tailpiece.peptide	P01877	N	9	327	M.AGKPTHInVSVVMAE.A	HexNAc(5)Hex(5)NeuAc(2)	Uncertain	542.171 ion		SA	a	3959.6652; 3959.6654; 3959.6657; 3959.6671; 3959.6637; 3959.6639; 3959.6654; 3959.6670; 3959.6685; 3959.6638; 3959.6667; 3959.6671; 3959.6678; 3959.6663; 3959.6669; 3959.6719; 3959.6690; 3959.6645; 3959.6664; 3959.6678; 3959.6668; 3959.6647; 3959.6648; 3959.6650; 3959.6653; 3959.6653; 3959.6683; 3959.6640; 3959.6650; 3959.6646; 3959.6650; 3959.6721; 3959.6658; 3959.6666; 3959.6644; 3959.6681; 395…	NGlycan/2407.8518	2	a_hIgA-SA-GLTrFASP-FZpipHILIC_E2_step.raw_20240829_noglyc_spec_cut; b_hIgA-SA-GLTrFASP-FZpipHILIC_D_step.raw_20240829_noglyc_spec_cut; b_hIgA-SA-GLTrFASP-FZpipHILIC_E1_step.raw_20240829_noglyc_spec_cut; b_hIgA-SA-GLTrFASP-FZpipHILIC_E2_step.raw_20240829_noglyc_spec_cut; c_hIgA-SA-GLTrFASP-FZpipHILIC_D_step.raw_20240829_noglyc_spec_cut; c_hIgA-SA-GLTrFASP-FZpipHILIC_E1_step.raw_20240829_noglyc_spe…	201.33	8.21e-04 - 6.66e-01		2	45.35 - 46.23	3	8	2	16	8.58e-04 - 6.76e-01	1.2 - 113.6	1.2 - 113.6	1320.8957; 1320.8957; 1320.8958; 1320.8963; 1320.8952; 1320.8953; 1320.8957; 1320.8963; 1320.8968; 1320.8952; 1320.8962; 1320.8963; 1320.8966; 1320.8961; 1320.8962; 1320.8979; 1320.8969; 1320.8954; 1320.8961; 1320.8965; 1320.8962; 1320.8955; 1320.8956; 1320.8956; 1320.8957; 1320.8957; 1320.8967; 1320.8953; 1320.8956; 1320.8955; 1320.8956; 1320.8980; 1320.8959; 1320.8961; 1320.8954; 1320.8967; 132…	1320.89	1.38; 1.43; 1.51; 1.87; 1.02; 1.07; 1.44; 1.84; 2.21; 1.03; 1.77; 1.86; 2.05; 1.67; 1.81; 3.08; 2.34; 1.20; 1.69; 2.04; 1.79; 1.25; 1.29; 1.33; 1.41; 1.40; 2.17; 1.08; 1.34; 1.24; 1.33; 3.11; 1.54; 1.74; 1.19; 2.12; 1.44; 1.33; 1.48; 1.44; 1.25; 1.54; 1.22; 2.21; 1.88; 0.90; 1.65; 1.92; 1.50; 1.63; 1.61; 2.32; 1.98; 2.29; 2.46; 1.31	0	3959.66	1; 2; 3; 4; 5; 6; 7; 8; 9; 10; 11; 12; 14; 15; 17; 18; 20; 21; 23; 24	2.297e+06 - 9.264e+08	45.35 - 46.23	1; 2; 3; 4; 5; 6; 7; 8; 9; 10; 11; 12; 14; 15; 17; 18; 20; 21; 23; 24-14955	HexNAc(5)Hex(5)NeuAc(2)
5.1	6491; 6524; 6538; 6540; 6601	46.0700; 46.3400; 46.5900; 46.6400; 47.7700	14955; 15055; 15145; 15164; 15568	sp|P01877|IGHA2_HUMAN Immunoglobulin heavy constant alpha 2_tailpiece.peptide	P01877	N	9	327	M.AGKPTHInVSVVMAE.A	HexNAc(5)Hex(5)NeuAc(2)	Uncertain	542.171 ion		SA	a	3959.6652; 3959.6654; 3959.6657; 3959.6671; 3959.6637	NGlycan/2407.8518	1	a_hIgA-SA-GLTrFASP-FZpipHILIC_E2_step.raw_20240829_noglyc_spec_cut	185.86	5.06e-03 - 7.81e-02	4680000000	2	46.15	3	8	2	16	5.29e-03 - 8.14e-02	14.2 - 80.5	14.2 - 80.5	1320.8957; 1320.8957; 1320.8958; 1320.8963; 1320.8952	1320.89	1.38; 1.43; 1.51; 1.87; 1.02	0	3959.66	1	6.45e+08	46.15	1-14955	HexNAc(5)Hex(5)NeuAc(2)
5.1.2	6524	46.3400	15055	sp|P01877|IGHA2_HUMAN Immunoglobulin heavy constant alpha 2_tailpiece.peptide	P01877	N	9	327	M.AGKPTHInVSVVMAE.A	HexNAc(5)Hex(5)NeuAc(2)	Uncertain	542.171 ion		SA	a	3959.6654	NGlycan/2407.8518	0	a_hIgA-SA-GLTrFASP-FZpipHILIC_E2_step.raw_20240829_noglyc_spec_cut	105.33	0.04	4680000000	2	46.15	3	8	2	16	0.042	14.2	14.2	1320.8957	1320.89	1.43	0	3959.66	1	6.45e+08	46.15	1-15055	HexNAc(5)Hex(5)NeuAc(2)
5.1.3	6538	46.5900	15145	sp|P01877|IGHA2_HUMAN Immunoglobulin heavy constant alpha 2_tailpiece.peptide	P01877	N	9	327	M.AGKPTHInVSVVMAE.A	HexNAc(5)Hex(5)NeuAc(2)	Uncertain	542.171 ion		SA	a	3959.6657	NGlycan/2407.8518	0	a_hIgA-SA-GLTrFASP-FZpipHILIC_E2_step.raw_20240829_noglyc_spec_cut	143.87	0.0081	4680000000	2	46.15	3	8	2	16	0.0084	66.4	66.4	1320.8958	1320.89	1.51	0	3959.66	1	6.45e+08	46.15	1-15145	HexNAc(5)Hex(5)NeuAc(2)
5.1.4	6601	47.7700	15568	sp|P01877|IGHA2_HUMAN Immunoglobulin heavy constant alpha 2_tailpiece.peptide	P01877	N	9	327	M.AGKPTHInVSVVMAE.A	HexNAc(5)Hex(5)NeuAc(2)	Uncertain	542.171 ion		SA	a	3959.6637	NGlycan/2407.8518	0	a_hIgA-SA-GLTrFASP-FZpipHILIC_E2_step.raw_20240829_noglyc_spec_cut	147.4	0.022	4680000000	2	46.15	3	8	2	16	0.023	55.0	55.0	1320.8952	1320.89	1.02	0	3959.66	1	6.45e+08	46.15	1-15568	HexNAc(5)Hex(5)NeuAc(2)
5.2	12128	46.1600	16816	sp|P01877|IGHA2_HUMAN Immunoglobulin heavy constant alpha 2_tailpiece.peptide	P01877	N	9	327	M.AGKPTHInVSVVMAE.A	HexNAc(5)Hex(5)NeuAc(2)	Uncertain	542.171 ion		SA	b	3959.6639	NGlycan/2407.8518	1	b_hIgA-SA-GLTrFASP-FZpipHILIC_D_step.raw_20240829_noglyc_spec_cut	117.6	0.0072	510000000	2	46.17	3	8	2	16	0.0075	64.1	64.1	1320.8953	1320.89	1.07	0	3959.66	2	7.1e+07	46.17	2-16816	HexNAc(5)Hex(5)NeuAc(2)
5.3	19019; 19032; 19093	46.0700; 46.3500; 53.8200	17026; 17134; 19873	sp|P01877|IGHA2_HUMAN Immunoglobulin heavy constant alpha 2_tailpiece.peptide	P01877	N	9	327	M.AGKPTHInVSVVMAE.A	HexNAc(5)Hex(5)NeuAc(2)	Uncertain	542.171 ion		SA	b	3959.6654; 3959.6670; 3959.6685	NGlycan/2407.8518	1	b_hIgA-SA-GLTrFASP-FZpipHILIC_E1_step.raw_20240829_noglyc_spec_cut	190.01	1.66e-03 - 1.36e-01	5970000000	2	46.17	3	8	2	16	1.74e-03 - 1.42e-01	28.6 - 85.7	28.6 - 85.7	1320.8957; 1320.8963; 1320.8968	1320.89	1.44; 1.84; 2.21	0	3959.66	3	7.78e+08	46.17	3-17026	HexNAc(5)Hex(5)NeuAc(2)
5.3.2	19032	46.3500	17134	sp|P01877|IGHA2_HUMAN Immunoglobulin heavy constant alpha 2_tailpiece.peptide	P01877	N	9	327	M.AGKPTHInVSVVMAE.A	HexNAc(5)Hex(5)NeuAc(2)	Uncertain	542.171 ion		SA	b	3959.6670	NGlycan/2407.8518	0	b_hIgA-SA-GLTrFASP-FZpipHILIC_E1_step.raw_20240829_noglyc_spec_cut	132.94	0.0017	5970000000	2	46.17	3	8	2	16	0.0017	51.6	51.6	1320.8963	1320.89	1.84	0	3959.66	3	7.78e+08	46.17	3-17134	HexNAc(5)Hex(5)NeuAc(2)
5.4	26135; 26160; 26193; 26206; 26235; 26246; 26400; 26409	45.7700; 46.0500; 46.3200; 46.6100; 47.1800; 47.4800; 55.7000; 55.9200	15316; 15415; 15515; 15617; 15820; 15928; 18831; 18906	sp|P01877|IGHA2_HUMAN Immunoglobulin heavy constant alpha 2_tailpiece.peptide	P01877	N	9	327	M.AGKPTHInVSVVMAE.A	HexNAc(5)Hex(5)NeuAc(2)	Uncertain	542.171 ion		SA	b	3959.6638; 3959.6667; 3959.6671; 3959.6678; 3959.6663; 3959.6669; 3959.6719; 3959.6690	NGlycan/2407.8518	1	b_hIgA-SA-GLTrFASP-FZpipHILIC_E2_step.raw_20240829_noglyc_spec_cut	179.97	8.12e-03 - 6.66e-01	3790000000	2	46.16	3	8	2	16	8.48e-03 - 6.76e-01	3.8 - 79.1	3.8 - 79.1	1320.8952; 1320.8962; 1320.8963; 1320.8966; 1320.8961; 1320.8962; 1320.8979; 1320.8969	1320.89	1.03; 1.77; 1.86; 2.05; 1.67; 1.81; 3.08; 2.34	0	3959.66	4	5.7e+08	46.16	4-15316	HexNAc(5)Hex(5)NeuAc(2)
5.4.1	26160	46.0500	15415	sp|P01877|IGHA2_HUMAN Immunoglobulin heavy constant alpha 2_tailpiece.peptide	P01877	N	9	327	M.AGKPTHInVSVVMAE.A	HexNAc(5)Hex(5)NeuAc(2)	Uncertain	542.171 ion		SA	b	3959.6667	NGlycan/2407.8518	0	b_hIgA-SA-GLTrFASP-FZpipHILIC_E2_step.raw_20240829_noglyc_spec_cut	179.97	0.014	3790000000	2	46.16	3	8	2	16	0.015	79.1	79.1	1320.8962	1320.89	1.77	0	3959.66	4	5.7e+08	46.16	4-15415	HexNAc(5)Hex(5)NeuAc(2)
5.4.2	26193	46.3200	15515	sp|P01877|IGHA2_HUMAN Immunoglobulin heavy constant alpha 2_tailpiece.peptide	P01877	N	9	327	M.AGKPTHInVSVVMAE.A	HexNAc(5)Hex(5)NeuAc(2)	Uncertain	542.171 ion		SA	b	3959.6671	NGlycan/2407.8518	0	b_hIgA-SA-GLTrFASP-FZpipHILIC_E2_step.raw_20240829_noglyc_spec_cut	142.78	0.0081	3790000000	2	46.16	3	8	2	16	0.0085	68.1	68.1	1320.8963	1320.89	1.86	0	3959.66	4	5.7e+08	46.16	4-15515	HexNAc(5)Hex(5)NeuAc(2)
5.4.3	26206	46.6100	15617	sp|P01877|IGHA2_HUMAN Immunoglobulin heavy constant alpha 2_tailpiece.peptide	P01877	N	9	327	M.AGKPTHInVSVVMAE.A	HexNAc(5)Hex(5)NeuAc(2)	Uncertain	542.171 ion		SA	b	3959.6678	NGlycan/2407.8518	0	b_hIgA-SA-GLTrFASP-FZpipHILIC_E2_step.raw_20240829_noglyc_spec_cut	113.27	0.041	3790000000	2	46.16	3	8	2	16	0.043	17.0	17.0	1320.8966	1320.89	2.05	0	3959.66	4	5.7e+08	46.16	4-15617	HexNAc(5)Hex(5)NeuAc(2)
5.5	31752	46.1300	16626	sp|P01877|IGHA2_HUMAN Immunoglobulin heavy constant alpha 2_tailpiece.peptide	P01877	N	9	327	M.AGKPTHInVSVVMAE.A	HexNAc(5)Hex(5)NeuAc(2)	Uncertain	542.171 ion		SA	c	3959.6645	NGlycan/2407.8518	1	c_hIgA-SA-GLTrFASP-FZpipHILIC_D_step.raw_20240829_noglyc_spec_cut	184.13	0.013	398000000	2	46.16	3	8	2	16	0.013	113.6	113.6	1320.8954	1320.89	1.20	0	3959.66	5	5.85e+07	46.16	5-16626	HexNAc(5)Hex(5)NeuAc(2)
5.6	38831; 38931	46.0800; 54.0700	17205; 20111	sp|P01877|IGHA2_HUMAN Immunoglobulin heavy constant alpha 2_tailpiece.peptide	P01877	N	9	327	M.AGKPTHInVSVVMAE.A	HexNAc(5)Hex(5)NeuAc(2)	Uncertain	542.171 ion		SA	c	3959.6664; 3959.6678	NGlycan/2407.8518	1	c_hIgA-SA-GLTrFASP-FZpipHILIC_E1_step.raw_20240829_noglyc_spec_cut	119.59	2.33e-03 - 5.97e-02	6210000000	2	46.19	3	8	2	16	2.43e-03 - 6.22e-02	16.4 - 63.9	16.4 - 63.9	1320.8961; 1320.8965	1320.89	1.69; 2.04	0	3959.66	6	8.55e+08	46.19	6-17205	HexNAc(5)Hex(5)NeuAc(2)
5.7	46024; 46042; 46080; 46108; 46121; 46126; 46180	45.8500; 46.0300; 46.3100; 46.8900; 47.1700; 47.4500; 53.9000	15415; 15481; 15582; 15787; 15885; 15986; 18210	sp|P01877|IGHA2_HUMAN Immunoglobulin heavy constant alpha 2_tailpiece.peptide	P01877	N	9	327	M.AGKPTHInVSVVMAE.A	HexNAc(5)Hex(5)NeuAc(2)	Uncertain	542.171 ion		SA	c	3959.6668; 3959.6647; 3959.6648; 3959.6650; 3959.6653; 3959.6653; 3959.6683	NGlycan/2407.8518	1	c_hIgA-SA-GLTrFASP-FZpipHILIC_E2_step.raw_20240829_noglyc_spec_cut	168.81	5.30e-03 - 1.17e-01	3220000000	2	46.15	3	8	2	16	5.53e-03 - 1.21e-01	19.3 - 95.3	19.3 - 95.3	1320.8962; 1320.8955; 1320.8956; 1320.8956; 1320.8957; 1320.8957; 1320.8967	1320.89	1.79; 1.25; 1.29; 1.33; 1.41; 1.40; 2.17	0	3959.66	7	4.33e+08	46.15	7-15415	HexNAc(5)Hex(5)NeuAc(2)
5.7.1	46042	46.0300	15481	sp|P01877|IGHA2_HUMAN Immunoglobulin heavy constant alpha 2_tailpiece.peptide	P01877	N	9	327	M.AGKPTHInVSVVMAE.A	HexNAc(5)Hex(5)NeuAc(2)	Uncertain	542.171 ion		SA	c	3959.6647	NGlycan/2407.8518	0	c_hIgA-SA-GLTrFASP-FZpipHILIC_E2_step.raw_20240829_noglyc_spec_cut	168.81	0.0053	3220000000	2	46.15	3	8	2	16	0.0055	95.3	95.3	1320.8955	1320.89	1.25	0	3959.66	7	4.33e+08	46.15	7-15481	HexNAc(5)Hex(5)NeuAc(2)
5.8	57946; 57967; 57969; 58075	46.0800; 46.3700; 46.4000; 55.5700	17225; 17336; 17347; 20447	sp|P01877|IGHA2_HUMAN Immunoglobulin heavy constant alpha 2_tailpiece.peptide	P01877	N	9	327	M.AGKPTHInVSVVMAE.A	HexNAc(5)Hex(5)NeuAc(2)	Uncertain	542.171 ion		SA	d	3959.6650; 3959.6646; 3959.6650; 3959.6721	NGlycan/2407.8518	1	d_hIgA-SA-GLTrFASP-FZpipHILIC_E1_step.raw_20240829_noglyc_spec_cut	200.28	8.21e-04 - 1.55e-01	5330000000	2	46.19	3	8	2	16	8.58e-04 - 1.61e-01	15.0 - 90.4	15.0 - 90.4	1320.8956; 1320.8955; 1320.8956; 1320.8980	1320.89	1.34; 1.24; 1.33; 3.11	0	3959.66	9	7.71e+08	46.19	9-17225	HexNAc(5)Hex(5)NeuAc(2)
5.8.2	57967	46.3700	17336	sp|P01877|IGHA2_HUMAN Immunoglobulin heavy constant alpha 2_tailpiece.peptide	P01877	N	9	327	M.AGKPTHInVSVVMAE.A	HexNAc(5)Hex(5)NeuAc(2)	Uncertain	542.171 ion		SA	d	3959.6646	NGlycan/2407.8518	0	d_hIgA-SA-GLTrFASP-FZpipHILIC_E1_step.raw_20240829_noglyc_spec_cut	138.58	0.0016	5330000000	2	46.19	3	8	2	16	0.0017	50.6	50.6	1320.8955	1320.89	1.24	0	3959.66	9	7.71e+08	46.19	9-17336	HexNAc(5)Hex(5)NeuAc(2)
5.9	65622; 65651; 65658; 65674; 65728; 65753; 65782	46.0600; 46.3800; 46.6900; 46.9700; 47.8400; 53.5400; 54.1500	15835; 15954; 16073; 16176; 16489; 18506; 18722	sp|P01877|IGHA2_HUMAN Immunoglobulin heavy constant alpha 2_tailpiece.peptide	P01877	N	9	327	M.AGKPTHInVSVVMAE.A	HexNAc(5)Hex(5)NeuAc(2)	Uncertain	542.171 ion		SA	d	3959.6658; 3959.6666; 3959.6644; 3959.6681; 3959.6654; 3959.6650; 3959.6656	NGlycan/2407.8518	1	d_hIgA-SA-GLTrFASP-FZpipHILIC_E2_step.raw_20240829_noglyc_spec_cut	139.43	8.28e-04 - 4.09e-02	6430000000	2	46.15	3	8	2	16	8.66e-04 - 4.26e-02	1.2 - 78.2	1.2 - 78.2	1320.8959; 1320.8961; 1320.8954; 1320.8967; 1320.8958; 1320.8956; 1320.8958	1320.89	1.54; 1.74; 1.19; 2.12; 1.44; 1.33; 1.48	0	3959.66	10	9.26e+08	46.15	10-15835	HexNAc(5)Hex(5)NeuAc(2)
5.9.2	65674	46.9700	16176	sp|P01877|IGHA2_HUMAN Immunoglobulin heavy constant alpha 2_tailpiece.peptide	P01877	N	9	327	M.AGKPTHInVSVVMAE.A	HexNAc(5)Hex(5)NeuAc(2)	Uncertain	542.171 ion		SA	d	3959.6681	NGlycan/2407.8518	0	d_hIgA-SA-GLTrFASP-FZpipHILIC_E2_step.raw_20240829_noglyc_spec_cut	102.09	0.0033	6430000000	2	46.15	3	8	2	16	0.0034	32.4	32.4	1320.8967	1320.89	2.12	0	3959.66	10	9.26e+08	46.15	10-16176	HexNAc(5)Hex(5)NeuAc(2)
5.10	71141	46.1900	16988	sp|P01877|IGHA2_HUMAN Immunoglobulin heavy constant alpha 2_tailpiece.peptide	P01877	N	9	327	M.AGKPTHInVSVVMAE.A	HexNAc(5)Hex(5)NeuAc(2)	Uncertain	542.171 ion		SA	a	3959.6654	NGlycan/2407.8518	1	a_hIgA-SA-GLTrFASP-FZpipHILIC_D_step.raw_20240829_noglyc_spec_cut	176.58	0.0099	402000000	2	46.23	3	8	2	16	0.01	90.5	90.5	1320.8957	1320.89	1.44	0	3959.66	11	5.47e+07	46.23	11-16988	HexNAc(5)Hex(5)NeuAc(2)
5.11	77180; 77201; 77273; 77279	46.0800; 46.3400; 53.9900; 54.1800	16163; 16267; 19067; 19134	sp|P01877|IGHA2_HUMAN Immunoglobulin heavy constant alpha 2_tailpiece.peptide	P01877	N	9	327	M.AGKPTHInVSVVMAE.A	HexNAc(5)Hex(5)NeuAc(2)	Uncertain	542.171 ion		SA	a	3959.6647; 3959.6658; 3959.6645; 3959.6685	NGlycan/2407.8518	1	a_hIgA-SA-GLTrFASP-FZpipHILIC_E1_step.raw_20240829_noglyc_spec_cut	140.26	1.87e-03 - 2.71e-01	5750000000	2	46.18	3	8	2	16	1.96e-03 - 2.80e-01	18.3 - 70.4	18.3 - 70.4	1320.8955; 1320.8959; 1320.8955; 1320.8968	1320.89	1.25; 1.54; 1.22; 2.21	0	3959.66	12	7.72e+08	46.18	12-16163	HexNAc(5)Hex(5)NeuAc(2)
5.11.2	77201	46.3400	16267	sp|P01877|IGHA2_HUMAN Immunoglobulin heavy constant alpha 2_tailpiece.peptide	P01877	N	9	327	M.AGKPTHInVSVVMAE.A	HexNAc(5)Hex(5)NeuAc(2)	Uncertain	542.171 ion		SA	a	3959.6658	NGlycan/2407.8518	0	a_hIgA-SA-GLTrFASP-FZpipHILIC_E1_step.raw_20240829_noglyc_spec_cut	133.45	0.0029	5750000000	2	46.18	3	8	2	16	0.003	70.4	70.4	1320.8959	1320.89	1.54	0	3959.66	12	7.72e+08	46.18	12-16267	HexNAc(5)Hex(5)NeuAc(2)
5.12	88770; 88795	45.2900; 45.5700	14376; 14470	sp|P01877|IGHA2_HUMAN Immunoglobulin heavy constant alpha 2_tailpiece.peptide	P01877	N	9	327	M.AGKPTHInVSVVMAE.A	HexNAc(5)Hex(5)NeuAc(2)	Uncertain	542.171 ion		AR	a	3959.6672; 3959.6633	NGlycan/2407.8518	1	a_hIgA-AR-GLTrFASP-FZpipHILIC_8mAbs_E2_step.raw_20240829_noglyc_spec_cut	153.91	2.67e-01 - 4.47e-01	51700000	2	45.36	3	8	2	16	2.75e-01 - 4.58e-01	25.1 - 48.7	25.1 - 48.7	1320.8963; 1320.8950	1320.89	1.88; 0.90	0	3959.66	14	7.29e+06	45.36	14-14376	HexNAc(5)Hex(5)NeuAc(2)
5.13	93730	45.4200	14964	sp|P01877|IGHA2_HUMAN Immunoglobulin heavy constant alpha 2_tailpiece.peptide	P01877	N	9	327	M.AGKPTHInVSVVMAE.A	HexNAc(5)Hex(5)NeuAc(2)	Uncertain	542.171 ion		AR	a	3959.6663	NGlycan/2407.8518	1	a_hIgA-AR-GLTrFASP-FZpipHILIC_39mAbs_E1_step.raw_20240829_noglyc_spec_cut	184.62	0.014	16600000	2	45.46	3	8	2	16	0.015	87.4	87.4	1320.8960	1320.89	1.65	0	3959.66	15	2.3e+06	45.46	15-14964	HexNAc(5)Hex(5)NeuAc(2)
5.14	104854; 104879	45.2900; 45.6000	15244; 15348	sp|P01877|IGHA2_HUMAN Immunoglobulin heavy constant alpha 2_tailpiece.peptide	P01877	N	9	327	M.AGKPTHInVSVVMAE.A	HexNAc(5)Hex(5)NeuAc(2)	Uncertain	542.171 ion		AR	b	3959.6673; 3959.6657	NGlycan/2407.8518	1	b_hIgA-AR-GLTrFASP-FZpipHILIC_11mAbs_E2_step.raw_20240829_noglyc_spec_cut	162.11	1.43e-01 - 2.51e-01	48100000	2	45.35	3	8	2	16	1.49e-01 - 2.60e-01	22.9 - 76.5	22.9 - 76.5	1320.8964; 1320.8958	1320.89	1.92; 1.50	0	3959.66	17	6.64e+06	45.35	17-15244	HexNAc(5)Hex(5)NeuAc(2)
5.15	107315	45.4300	15040	sp|P01877|IGHA2_HUMAN Immunoglobulin heavy constant alpha 2_tailpiece.peptide	P01877	N	9	327	M.AGKPTHInVSVVMAE.A	HexNAc(5)Hex(5)NeuAc(2)	Uncertain	542.171 ion		AR	b	3959.6662	NGlycan/2407.8518	1	b_hIgA-AR-GLTrFASP-FZpipHILIC_47mAbs_E1_step.raw_20240829_noglyc_spec_cut	201.33	0.033	46500000	2	45.48	3	8	2	16	0.034	95.1	95.1	1320.8960	1320.89	1.63	0	3959.66	18	6.17e+06	45.48	18-15040	HexNAc(5)Hex(5)NeuAc(2)
5.16	120959; 120974	45.3200; 45.5900	15348; 15447	sp|P01877|IGHA2_HUMAN Immunoglobulin heavy constant alpha 2_tailpiece.peptide	P01877	N	9	327	M.AGKPTHInVSVVMAE.A	HexNAc(5)Hex(5)NeuAc(2)	Uncertain	542.171 ion		AR	c	3959.6661; 3959.6689	NGlycan/2407.8518	1	c_hIgA-AR-GLTrFASP-FZpipHILIC_16mAbs_E2_step.raw_20240829_noglyc_spec_cut	108.54	1.86e-01 - 5.37e-01	16200000	2	45.39	3	8	2	16	1.93e-01 - 5.48e-01	9.0 - 31.8	9.0 - 31.8	1320.8960; 1320.8969	1320.89	1.61; 2.32	0	3959.66	20	2.3e+06	45.39	20-15348	HexNAc(5)Hex(5)NeuAc(2)
5.17	126216	45.4400	15127	sp|P01877|IGHA2_HUMAN Immunoglobulin heavy constant alpha 2_tailpiece.peptide	P01877	N	9	327	M.AGKPTHInVSVVMAE.A	HexNAc(5)Hex(5)NeuAc(2)	Uncertain	542.171 ion		AR	c	3959.6676	NGlycan/2407.8518	1	c_hIgA-AR-GLTrFASP-FZpipHILIC_55mAbs_E1_step.raw_20240829_noglyc_spec_cut	194.57	0.13	47500000	2	45.45	3	8	2	16	0.13	90.9	90.9	1320.8965	1320.89	1.98	0	3959.66	21	6.5e+06	45.45	21-15127	HexNAc(5)Hex(5)NeuAc(2)
5.18	137877; 137914	45.3300; 45.6100	14788; 14878	sp|P01877|IGHA2_HUMAN Immunoglobulin heavy constant alpha 2_tailpiece.peptide	P01877	N	9	327	M.AGKPTHInVSVVMAE.A	HexNAc(5)Hex(5)NeuAc(2)	Uncertain	542.171 ion		AR	d	3959.6688; 3959.6694	NGlycan/2407.8518	1	d_hIgA-AR-GLTrFASP-FZpipHILIC_16mAbs_E2_step.raw_20240829_noglyc_spec_cut	142.17	2.56e-01 - 6.63e-01	48400000	2	45.41	3	8	2	16	2.64e-01 - 6.73e-01	43.3 - 61.5	43.3 - 61.5	1320.8969; 1320.8971	1320.89	2.29; 2.46	0	3959.66	23	7.23e+06	45.41	23-14788	HexNAc(5)Hex(5)NeuAc(2)
5.18.2	137914	45.6100	14878	sp|P01877|IGHA2_HUMAN Immunoglobulin heavy constant alpha 2_tailpiece.peptide	P01877	N	9	327	M.AGKPTHInVSVVMAE.A	HexNAc(5)Hex(5)NeuAc(2)	Uncertain	542.171 ion		AR	d	3959.6694	NGlycan/2407.8518	0	d_hIgA-AR-GLTrFASP-FZpipHILIC_16mAbs_E2_step.raw_20240829_noglyc_spec_cut	127.97	0.66	48400000	2	45.41	3	8	2	16	0.67	43.3	43.3	1320.8971	1320.89	2.46	0	3959.66	23	7.23e+06	45.41	23-14878	HexNAc(5)Hex(5)NeuAc(2)
5.19	143658	45.4500	15218	sp|P01877|IGHA2_HUMAN Immunoglobulin heavy constant alpha 2_tailpiece.peptide	P01877	N	9	327	M.AGKPTHInVSVVMAE.A	HexNAc(5)Hex(5)NeuAc(2)	Uncertain	542.171 ion		AR	d	3959.6649	NGlycan/2407.8518	1	d_hIgA-AR-GLTrFASP-FZpipHILIC_35mAbs_E1_step.raw_20240829_noglyc_spec_cut	187.77	0.0049	46700000	2	45.47	3	8	2	16	0.0051	95.2	95.2	1320.8956	1320.89	1.31	0	3959.66	24	7e+06	45.47	24-15218	HexNAc(5)Hex(5)NeuAc(2)
6	6496; 6531; 19021; 26162; 26200; 38835; 46047; 57949; 65625; 65650; 77182; 88781; 104865; 120964	46.1300; 46.4200; 46.0800; 46.3800; 46.1500; 46.1400; 46.0900; 46.3600; 46.1100; 45.3800; 45.3600; 45.3700	14976; 15080; 17047; 15427; 15534; 17232; 15497; 17249; 15844; 15947; 16176; 14406; 15267; 15367	sp|P01877|IGHA2_HUMAN Immunoglobulin heavy constant alpha 2_tailpiece.peptide	P01877	N	9	327	M.AGKPTHInVSVVMAE.A	HexNAc(5)Hex(5)NeuAc(2)	Uncertain			SA	a	3959.6630; 3959.6641; 3959.6662; 3959.6673; 3959.6656; 3959.6645; 3959.6657; 3959.6665; 3959.6645; 3959.6626; 3959.6647; 3959.6675; 3959.6645; 3959.6645	NGlycan/2407.8518	2	a_hIgA-SA-GLTrFASP-FZpipHILIC_E2_step.raw_20240829_noglyc_spec_cut; b_hIgA-SA-GLTrFASP-FZpipHILIC_E1_step.raw_20240829_noglyc_spec_cut; b_hIgA-SA-GLTrFASP-FZpipHILIC_E2_step.raw_20240829_noglyc_spec_cut; c_hIgA-SA-GLTrFASP-FZpipHILIC_E1_step.raw_20240829_noglyc_spec_cut; c_hIgA-SA-GLTrFASP-FZpipHILIC_E2_step.raw_20240829_noglyc_spec_cut; d_hIgA-SA-GLTrFASP-FZpipHILIC_E1_step.raw_20240829_noglyc_s…	161.51	1.74e-04 - 2.24e-01		2	45.35 - 46.21	4	8	2	16	1.82e-04 - 2.32e-01	16.9 - 102.6	16.9 - 102.6	990.9230; 990.9233; 990.9238; 990.9241; 990.9237; 990.9234; 990.9237; 990.9239; 990.9234; 990.9229; 990.9235; 990.9242; 990.9234; 990.9234	990.922	0.83; 1.10; 1.64; 1.90; 1.47; 1.20; 1.52; 1.71; 1.22; 0.73; 1.26; 1.96; 1.20; 1.20	0	3959.66	1; 3; 4; 6; 7; 9; 10; 12; 14; 17; 20	1.815e+05 - 2.424e+07	45.35 - 46.21	1; 3; 4; 6; 7; 9; 10; 12; 14; 17; 20-14976	HexNAc(5)Hex(5)NeuAc(2)
6.1	6496; 6531	46.1300; 46.4200	14976; 15080	sp|P01877|IGHA2_HUMAN Immunoglobulin heavy constant alpha 2_tailpiece.peptide	P01877	N	9	327	M.AGKPTHInVSVVMAE.A	HexNAc(5)Hex(5)NeuAc(2)	Uncertain			SA	a	3959.6630; 3959.6641	NGlycan/2407.8518	1	a_hIgA-SA-GLTrFASP-FZpipHILIC_E2_step.raw_20240829_noglyc_spec_cut	130.15	7.53e-03 - 2.06e-02	78900000	2	46.21	4	8	2	16	7.87e-03 - 2.16e-02	33.4 - 71.0	33.4 - 71.0	990.9230; 990.9233	990.922	0.83; 1.10	0	3959.66	1	1.39e+07	46.21	1-14976	HexNAc(5)Hex(5)NeuAc(2)
6.2	19021	46.1300	17047	sp|P01877|IGHA2_HUMAN Immunoglobulin heavy constant alpha 2_tailpiece.peptide	P01877	N	9	327	M.AGKPTHInVSVVMAE.A	HexNAc(5)Hex(5)NeuAc(2)	Uncertain			SA	b	3959.6662	NGlycan/2407.8518	1	b_hIgA-SA-GLTrFASP-FZpipHILIC_E1_step.raw_20240829_noglyc_spec_cut	119.27	0.0033	173000000	2	46.20	4	8	2	16	0.0035	52.9	52.9	990.9238	990.922	1.64	0	3959.66	3	2.38e+07	46.20	3-17047	HexNAc(5)Hex(5)NeuAc(2)
6.3	26162; 26200	46.0800; 46.3800	15427; 15534	sp|P01877|IGHA2_HUMAN Immunoglobulin heavy constant alpha 2_tailpiece.peptide	P01877	N	9	327	M.AGKPTHInVSVVMAE.A	HexNAc(5)Hex(5)NeuAc(2)	Uncertain			SA	b	3959.6673; 3959.6656	NGlycan/2407.8518	1	b_hIgA-SA-GLTrFASP-FZpipHILIC_E2_step.raw_20240829_noglyc_spec_cut	150.29	0.0034	69800000	2	46.14	4	8	2	16	0.0035	84.2 - 87.5	84.2 - 87.5	990.9241; 990.9237	990.922	1.90; 1.47	0	3959.66	4	9.73e+06	46.14	4-15427	HexNAc(5)Hex(5)NeuAc(2)
6.3.2	26200	46.3800	15534	sp|P01877|IGHA2_HUMAN Immunoglobulin heavy constant alpha 2_tailpiece.peptide	P01877	N	9	327	M.AGKPTHInVSVVMAE.A	HexNAc(5)Hex(5)NeuAc(2)	Uncertain			SA	b	3959.6656	NGlycan/2407.8518	0	b_hIgA-SA-GLTrFASP-FZpipHILIC_E2_step.raw_20240829_noglyc_spec_cut	138.72	0.0034	69800000	2	46.14	4	8	2	16	0.0035	84.2	84.2	990.9237	990.922	1.47	0	3959.66	4	9.73e+06	46.14	4-15534	HexNAc(5)Hex(5)NeuAc(2)
6.4	38835	46.1500	17232	sp|P01877|IGHA2_HUMAN Immunoglobulin heavy constant alpha 2_tailpiece.peptide	P01877	N	9	327	M.AGKPTHInVSVVMAE.A	HexNAc(5)Hex(5)NeuAc(2)	Uncertain			SA	c	3959.6645	NGlycan/2407.8518	1	c_hIgA-SA-GLTrFASP-FZpipHILIC_E1_step.raw_20240829_noglyc_spec_cut	154.77	0.0014	103000000	2	46.17	4	8	2	16	0.0014	90.1	90.1	990.9234	990.922	1.20	0	3959.66	6	1.6e+07	46.17	6-17232	HexNAc(5)Hex(5)NeuAc(2)
6.5	46047	46.0800	15497	sp|P01877|IGHA2_HUMAN Immunoglobulin heavy constant alpha 2_tailpiece.peptide	P01877	N	9	327	M.AGKPTHInVSVVMAE.A	HexNAc(5)Hex(5)NeuAc(2)	Uncertain			SA	c	3959.6657	NGlycan/2407.8518	1	c_hIgA-SA-GLTrFASP-FZpipHILIC_E2_step.raw_20240829_noglyc_spec_cut	131.14	0.0014	66600000	2	46.15	4	8	2	16	0.0014	71.8	71.8	990.9237	990.922	1.52	0	3959.66	7	1.23e+07	46.15	7-15497	HexNAc(5)Hex(5)NeuAc(2)
6.6	57949	46.1400	17249	sp|P01877|IGHA2_HUMAN Immunoglobulin heavy constant alpha 2_tailpiece.peptide	P01877	N	9	327	M.AGKPTHInVSVVMAE.A	HexNAc(5)Hex(5)NeuAc(2)	Uncertain			SA	d	3959.6665	NGlycan/2407.8518	1	d_hIgA-SA-GLTrFASP-FZpipHILIC_E1_step.raw_20240829_noglyc_spec_cut	161.51	0.0049	87900000	2	46.17	4	8	2	16	0.0051	101.3	101.3	990.9239	990.922	1.71	0	3959.66	9	1.22e+07	46.17	9-17249	HexNAc(5)Hex(5)NeuAc(2)
6.7	65625; 65650	46.0900; 46.3600	15844; 15947	sp|P01877|IGHA2_HUMAN Immunoglobulin heavy constant alpha 2_tailpiece.peptide	P01877	N	9	327	M.AGKPTHInVSVVMAE.A	HexNAc(5)Hex(5)NeuAc(2)	Uncertain			SA	d	3959.6645; 3959.6626	NGlycan/2407.8518	1	d_hIgA-SA-GLTrFASP-FZpipHILIC_E2_step.raw_20240829_noglyc_spec_cut	151.21	1.74e-04 - 4.33e-04	148000000	2	46.17	4	8	2	16	1.82e-04 - 4.53e-04	56.1 - 102.6	56.1 - 102.6	990.9234; 990.9229	990.922	1.22; 0.73	0	3959.66	10	2.42e+07	46.17	10-15844	HexNAc(5)Hex(5)NeuAc(2)
6.7.2	65650	46.3600	15947	sp|P01877|IGHA2_HUMAN Immunoglobulin heavy constant alpha 2_tailpiece.peptide	P01877	N	9	327	M.AGKPTHInVSVVMAE.A	HexNAc(5)Hex(5)NeuAc(2)	Uncertain			SA	d	3959.6626	NGlycan/2407.8518	0	d_hIgA-SA-GLTrFASP-FZpipHILIC_E2_step.raw_20240829_noglyc_spec_cut	133.05	0.00043	148000000	2	46.17	4	8	2	16	0.00045	56.1	56.1	990.9229	990.922	0.73	0	3959.66	10	2.42e+07	46.17	10-15947	HexNAc(5)Hex(5)NeuAc(2)
6.8	88781	45.3800	14406	sp|P01877|IGHA2_HUMAN Immunoglobulin heavy constant alpha 2_tailpiece.peptide	P01877	N	9	327	M.AGKPTHInVSVVMAE.A	HexNAc(5)Hex(5)NeuAc(2)	Uncertain			AR	a	3959.6675	NGlycan/2407.8518	1	a_hIgA-AR-GLTrFASP-FZpipHILIC_8mAbs_E2_step.raw_20240829_noglyc_spec_cut	140.43	0.14	4780000	2	45.36	4	8	2	16	0.15	92.0	92.0	990.9242	990.922	1.96	0	3959.66	14	7.22e+05	45.36	14-14406	HexNAc(5)Hex(5)NeuAc(2)
6.9	104865	45.3600	15267	sp|P01877|IGHA2_HUMAN Immunoglobulin heavy constant alpha 2_tailpiece.peptide	P01877	N	9	327	M.AGKPTHInVSVVMAE.A	HexNAc(5)Hex(5)NeuAc(2)	Uncertain			AR	b	3959.6645	NGlycan/2407.8518	1	b_hIgA-AR-GLTrFASP-FZpipHILIC_11mAbs_E2_step.raw_20240829_noglyc_spec_cut	147.83	0.0059	5390000	2	45.35	4	8	2	16	0.0062	93.8	93.8	990.9234	990.922	1.20	0	3959.66	17	9.94e+05	45.35	17-15267	HexNAc(5)Hex(5)NeuAc(2)
7	6504; 19026; 26168	46.1700; 46.1800; 46.1300	14991; 17069; 15445	sp|P01877|IGHA2_HUMAN Immunoglobulin heavy constant alpha 2_tailpiece.peptide	P01877	N	9	327	M.AGKPTHInVSVVMAE.A	HexNAc(5)Hex(6)Fuc(1)NeuAc(1)	Uncertain			SA	a	3976.6852; 3976.6914; 3976.6890	NGlycan/2424.8671	2	a_hIgA-SA-GLTrFASP-FZpipHILIC_E2_step.raw_20240829_noglyc_spec_cut; b_hIgA-SA-GLTrFASP-FZpipHILIC_E1_step.raw_20240829_noglyc_spec_cut; b_hIgA-SA-GLTrFASP-FZpipHILIC_E2_step.raw_20240829_noglyc_spec_cut	115.27	8.58e-02 - 7.49e-01		2	46.12 - 46.21	4	8	2	16	8.94e-02 - 7.58e-01	30.0 - 115.3	30.0 - 115.3	995.1786; 995.1801; 995.1795	995.176	2.56; 4.11; 3.51	0	3976.68	1; 3; 4	7.484e+05 - 2.307e+06	46.12 - 46.21	1; 3; 4-14991	HexNAc(5)Hex(6)Fuc(1)NeuAc(1)
7.1	26168	46.1300	15445	sp|P01877|IGHA2_HUMAN Immunoglobulin heavy constant alpha 2_tailpiece.peptide	P01877	N	9	327	M.AGKPTHInVSVVMAE.A	HexNAc(5)Hex(6)Fuc(1)NeuAc(1)	Uncertain			SA	b	3976.6890	NGlycan/2424.8671	1	b_hIgA-SA-GLTrFASP-FZpipHILIC_E2_step.raw_20240829_noglyc_spec_cut	115.27	0.086	6400000	2	46.12	4	8	2	16	0.089	115.3	115.3	995.1795	995.176	3.51	0	3976.68	4	7.48e+05	46.12	4-15445	HexNAc(5)Hex(6)Fuc(1)NeuAc(1)
8	6489; 6505; 19028; 26170; 26188; 38850; 46045; 46055; 57958; 71143; 77186; 77190; 77191	46.0300; 46.1700; 46.2000; 46.1400; 46.2700; 46.3600; 46.0600; 46.3200	14942; 14992; 17075; 15448; 15495; 17312; 15490; 15520; 17272; 17036; 16198; 16210; 16212	sp|P01877|IGHA2_HUMAN Immunoglobulin heavy constant alpha 2_tailpiece.peptide	P01877	N	9	327	M.AGKPTHInVSVVMAE.A	HexNAc(5)Hex(5)Fuc(1)NeuAc(2)	Uncertain			SA	a	4105.7238; 4105.7237; 4105.7226; 4105.7239; 4105.7228; 4105.7200; 4105.7221; 4105.7259; 4105.7232; 4105.7290; 4105.7229; 4105.7236; 4105.7229	NGlycan/2553.9097	2	a_hIgA-SA-GLTrFASP-FZpipHILIC_E2_step.raw_20240829_noglyc_spec_cut; b_hIgA-SA-GLTrFASP-FZpipHILIC_E1_step.raw_20240829_noglyc_spec_cut; b_hIgA-SA-GLTrFASP-FZpipHILIC_E2_step.raw_20240829_noglyc_spec_cut; c_hIgA-SA-GLTrFASP-FZpipHILIC_E1_step.raw_20240829_noglyc_spec_cut; c_hIgA-SA-GLTrFASP-FZpipHILIC_E2_step.raw_20240829_noglyc_spec_cut; d_hIgA-SA-GLTrFASP-FZpipHILIC_E1_step.raw_20240829_noglyc_s…	186.44	1.79e-03 - 7.20e-01		2	46.20 - 46.30	3	8	2	16	1.87e-03 - 7.29e-01	7.1 - 93.0	7.1 - 93.0	1369.5819; 1369.5818; 1369.5815; 1369.5819; 1369.5815; 1369.5806; 1369.5813; 1369.5826; 1369.5817; 1369.5836; 1369.5816; 1369.5818; 1369.5816	1369.58	1.51; 1.48; 1.20; 1.52; 1.25; 0.58; 1.09; 2.00; 1.36; 2.77; 1.28; 1.46; 1.28	-1 - 0	4105.72	1; 3; 4; 6; 7; 9; 11; 12	1.342e+06 - 1.347e+07	46.20 - 46.30	1; 3; 4; 6; 7; 9; 11; 12-14942	HexNAc(5)Hex(5)Fuc(1)NeuAc(2)
8.1	6489; 6505	46.0300; 46.1700	14942; 14992	sp|P01877|IGHA2_HUMAN Immunoglobulin heavy constant alpha 2_tailpiece.peptide	P01877	N	9	327	M.AGKPTHInVSVVMAE.A	HexNAc(5)Hex(5)Fuc(1)NeuAc(2)	Uncertain			SA	a	4105.7238; 4105.7237	NGlycan/2553.9097	1	a_hIgA-SA-GLTrFASP-FZpipHILIC_E2_step.raw_20240829_noglyc_spec_cut	149.07	3.99e-02 - 4.18e-02	86200000	2	46.26	3	8	2	16	4.16e-02 - 4.36e-02	11.1 - 73.4	11.1 - 73.4	1369.5819; 1369.5818	1369.58	1.51; 1.48	-1 - 0	4105.72	1	1.17e+07	46.26	1-14942	HexNAc(5)Hex(5)Fuc(1)NeuAc(2)
8.1.2	6505	46.1700	14992	sp|P01877|IGHA2_HUMAN Immunoglobulin heavy constant alpha 2_tailpiece.peptide	P01877	N	9	327	M.AGKPTHInVSVVMAE.A	HexNAc(5)Hex(5)Fuc(1)NeuAc(2)	Uncertain			SA	a	4105.7237	NGlycan/2553.9097	0	a_hIgA-SA-GLTrFASP-FZpipHILIC_E2_step.raw_20240829_noglyc_spec_cut	149.07	0.042	86200000	2	46.26	3	8	2	16	0.044	73.4	73.4	1369.5818	1369.58	1.48	-1	4105.72	1	1.17e+07	46.26	1-14992	HexNAc(5)Hex(5)Fuc(1)NeuAc(2)
8.2	19028	46.2000	17075	sp|P01877|IGHA2_HUMAN Immunoglobulin heavy constant alpha 2_tailpiece.peptide	P01877	N	9	327	M.AGKPTHInVSVVMAE.A	HexNAc(5)Hex(5)Fuc(1)NeuAc(2)	Uncertain			SA	b	4105.7226	NGlycan/2553.9097	1	b_hIgA-SA-GLTrFASP-FZpipHILIC_E1_step.raw_20240829_noglyc_spec_cut	109.63	0.0033	82900000	2	46.25	3	8	2	16	0.0034	31.9	31.9	1369.5815	1369.58	1.20	0	4105.72	3	1.22e+07	46.25	3-17075	HexNAc(5)Hex(5)Fuc(1)NeuAc(2)
8.3	26170; 26188	46.1400; 46.2700	15448; 15495	sp|P01877|IGHA2_HUMAN Immunoglobulin heavy constant alpha 2_tailpiece.peptide	P01877	N	9	327	M.AGKPTHInVSVVMAE.A	HexNAc(5)Hex(5)Fuc(1)NeuAc(2)	Uncertain			SA	b	4105.7239; 4105.7228	NGlycan/2553.9097	1	b_hIgA-SA-GLTrFASP-FZpipHILIC_E2_step.raw_20240829_noglyc_spec_cut	162.66	1.79e-03 - 1.28e-02	73500000	2	46.24	3	8	2	16	1.87e-03 - 1.34e-02	50.5 - 93.0	50.5 - 93.0	1369.5819; 1369.5815	1369.58	1.52; 1.25	0	4105.72	4	1e+07	46.24	4-15448	HexNAc(5)Hex(5)Fuc(1)NeuAc(2)
8.3.2	26188	46.2700	15495	sp|P01877|IGHA2_HUMAN Immunoglobulin heavy constant alpha 2_tailpiece.peptide	P01877	N	9	327	M.AGKPTHInVSVVMAE.A	HexNAc(5)Hex(5)Fuc(1)NeuAc(2)	Uncertain			SA	b	4105.7228	NGlycan/2553.9097	0	b_hIgA-SA-GLTrFASP-FZpipHILIC_E2_step.raw_20240829_noglyc_spec_cut	162.66	0.0018	73500000	2	46.24	3	8	2	16	0.0019	93.0	93.0	1369.5815	1369.58	1.25	0	4105.72	4	1e+07	46.24	4-15495	HexNAc(5)Hex(5)Fuc(1)NeuAc(2)
8.4	77186; 77190; 77191	46.1700; 46.2000	16198; 16210; 16212	sp|P01877|IGHA2_HUMAN Immunoglobulin heavy constant alpha 2_tailpiece.peptide	P01877	N	9	327	M.AGKPTHInVSVVMAE.A	HexNAc(5)Hex(5)Fuc(1)NeuAc(2)	Uncertain			SA	a	4105.7229; 4105.7236; 4105.7229	NGlycan/2553.9097	1	a_hIgA-SA-GLTrFASP-FZpipHILIC_E1_step.raw_20240829_noglyc_spec_cut	186.44	1.87e-03 - 1.12e-01	86200000	2	46.26	3	8	2	16	1.96e-03 - 1.17e-01	25.8 - 92.3	25.8 - 92.3	1369.5816; 1369.5818; 1369.5816	1369.58	1.28; 1.46; 1.28	0	4105.72	12	1.28e+07	46.26	12-16198	HexNAc(5)Hex(5)Fuc(1)NeuAc(2)
8.4.1	77190	46.2000	16210	sp|P01877|IGHA2_HUMAN Immunoglobulin heavy constant alpha 2_tailpiece.peptide	P01877	N	9	327	M.AGKPTHInVSVVMAE.A	HexNAc(5)Hex(5)Fuc(1)NeuAc(2)	Uncertain			SA	a	4105.7236	NGlycan/2553.9097	0	a_hIgA-SA-GLTrFASP-FZpipHILIC_E1_step.raw_20240829_noglyc_spec_cut	186.44	0.0019	86200000	2	46.26	3	8	2	16	0.002	92.3	92.3	1369.5818	1369.58	1.46	0	4105.72	12	1.28e+07	46.26	12-16210	HexNAc(5)Hex(5)Fuc(1)NeuAc(2)
8.4.2	77191	46.2000	16212	sp|P01877|IGHA2_HUMAN Immunoglobulin heavy constant alpha 2_tailpiece.peptide	P01877	N	9	327	M.AGKPTHInVSVVMAE.A	HexNAc(5)Hex(5)Fuc(1)NeuAc(2)	Uncertain			SA	a	4105.7229	NGlycan/2553.9097	0	a_hIgA-SA-GLTrFASP-FZpipHILIC_E1_step.raw_20240829_noglyc_spec_cut	134.68	0.0063	86200000	2	46.26	3	8	2	16	0.0066	25.8	25.8	1369.5816	1369.58	1.28	0	4105.72	12	1.28e+07	46.26	12-16212	HexNAc(5)Hex(5)Fuc(1)NeuAc(2)
9	6093; 6095; 6099; 6100; 25722; 25724; 45622; 45623; 65301; 65302; 65306; 88285; 88286; 88287; 88306; 93668; 104040; 104333; 104334; 104341; 104343; 104345; 104346; 104347; 104379; 120651; 120653; 120672; 120684; 130989; 137350; 137351; 137367; 137370; 137402	41.2400; 41.2600; 41.2700; 41.0800; 41.0900; 41.1000; 41.1300; 39.9600; 39.9700; 39.9800; 40.1300; 40.1000; 37.0200; 39.9300; 39.9400; 40.0100; 40.0200; 40.0300; 40.0400; 40.2900; 40.1100; 40.2100; 40.6300; 39.9900; 40.0900	13221; 13224; 13230; 13233; 13643; 13646; 13708; 13710; 13984; 13987; 14001; 12508; 12510; 12514; 12566; 12951; 12327; 13377; 13379; 13405; 13410; 13413; 13414; 13415; 13501; 13443; 13445; 13504; 13537; 12980; 12949; 12981; 12990; 13055	sp|P01876|IGHA1_HUMAN Immunoglobulin heavy constant alpha 1_tailpiece.peptide	P01876	N	9	340	L.AGKPTHVnVSVVMAEVDGTC.Y	HexNAc(6)Hex(3)Fuc(2)NeuAc(2)	Uncertain			SA	a	4648.9163; 4648.9163; 4648.9206; 4648.9206; 4648.9147; 4648.9147; 4648.9161; 4648.9161; 4648.9133; 4648.9133; 4648.9177; 4648.9144; 4648.9144; 4648.9144; 4648.9170; 4648.9203; 4648.9080; 4648.9194; 4648.9194; 4648.9165; 4648.9180; 4648.9180; 4648.9180; 4648.9180; 4648.9181; 4648.9224; 4648.9224; 4648.9225; 4648.9182; 4648.9161; 4648.9192; 4648.9192; 4648.9173; 4648.9178; 4648.9218	NGlycan/2578.9414	2	a_hIgA-SA-GLTrFASP-FZpipHILIC_E2_step.raw_20240829_noglyc_spec_cut; b_hIgA-SA-GLTrFASP-FZpipHILIC_E2_step.raw_20240829_noglyc_spec_cut; c_hIgA-SA-GLTrFASP-FZpipHILIC_E2_step.raw_20240829_noglyc_spec_cut; d_hIgA-SA-GLTrFASP-FZpipHILIC_E2_step.raw_20240829_noglyc_spec_cut; a_hIgA-AR-GLTrFASP-FZpipHILIC_8mAbs_E2_step.raw_20240829_noglyc_spec_cut; a_hIgA-AR-GLTrFASP-FZpipHILIC_39mAbs_E1_step.raw_2024…	129.53	1.86e-01 - 9.96e-01		2	39.99 - 41.28	4	8	2	21	1.93e-01 - 9.96e-01	0.8 - 129.5	0.8 - 129.5	1163.2363; 1163.2363; 1163.2374; 1163.2374; 1163.2360; 1163.2360; 1163.2363; 1163.2363; 1163.2356; 1163.2356; 1163.2367; 1163.2359; 1163.2359; 1163.2359; 1163.2365; 1163.2373; 1163.2343; 1163.2371; 1163.2371; 1163.2364; 1163.2368; 1163.2368; 1163.2368; 1163.2368; 1163.2368; 1163.2379; 1163.2379; 1163.2379; 1163.2368; 1163.2363; 1163.2371; 1163.2371; 1163.2366; 1163.2367; 1163.2377	1163.24	-2.69; -2.69; -1.75; -1.75; -3.02; -3.02; -2.72; -2.72; -3.33; -3.33; -2.38; -3.09; -3.09; -3.09; -2.54; -1.82; -4.47; -2.01; -2.01; -2.64; -2.32; -2.32; -2.32; -2.32; -2.30; -1.37; -1.37; -1.35; -2.28; -2.73; -2.05; -2.05; -2.46; -2.36; -1.49	-1 - 0	4648.93	1; 4; 7; 10; 14; 15; 17; 20; 22; 23	6.914e+05 - 6.496e+06	39.99 - 41.28	1; 4; 7; 10; 14; 15; 17; 20; 22; 23-13221	HexNAc(6)Hex(3)Fuc(2)NeuAc(2)
9.1	104040; 104333; 104334; 104341; 104343; 104345; 104346; 104347; 104379	37.0200; 39.9300; 39.9400; 40.0100; 40.0200; 40.0300; 40.0400; 40.2900	12327; 13377; 13379; 13405; 13410; 13413; 13414; 13415; 13501	sp|P01876|IGHA1_HUMAN Immunoglobulin heavy constant alpha 1_tailpiece.peptide	P01876	N	9	340	L.AGKPTHVnVSVVMAEVDGTC.Y	HexNAc(6)Hex(3)Fuc(2)NeuAc(2)	Uncertain			AR	b	4648.9080; 4648.9194; 4648.9194; 4648.9165; 4648.9180; 4648.9180; 4648.9180; 4648.9180; 4648.9181	NGlycan/2578.9414	1	b_hIgA-AR-GLTrFASP-FZpipHILIC_11mAbs_E2_step.raw_20240829_noglyc_spec_cut	129.53	5.67e-01 - 9.96e-01	59500000	2	40.02	4	8	2	21	5.78e-01 - 9.96e-01	0.8 - 129.5	0.8 - 129.5	1163.2343; 1163.2371; 1163.2371; 1163.2364; 1163.2368; 1163.2368; 1163.2368; 1163.2368; 1163.2368	1163.24	-4.47; -2.01; -2.01; -2.64; -2.32; -2.32; -2.32; -2.32; -2.30	-1	4648.93	17	3.89e+06	40.02	17-12327	HexNAc(6)Hex(3)Fuc(2)NeuAc(2)
9.1.1	104333	39.9300	13377	sp|P01876|IGHA1_HUMAN Immunoglobulin heavy constant alpha 1_tailpiece.peptide	P01876	N	9	340	L.AGKPTHVnVSVVMAEVDGTC.Y	HexNAc(6)Hex(3)Fuc(2)NeuAc(2)	Uncertain			AR	b	4648.9194	NGlycan/2578.9414	0	b_hIgA-AR-GLTrFASP-FZpipHILIC_11mAbs_E2_step.raw_20240829_noglyc_spec_cut	129.53	0.57	59500000	2	40.02	4	8	2	21	0.58	129.5	129.5	1163.2371	1163.24	-2.01	-1	4648.93	17	3.89e+06	40.02	17-13377	HexNAc(6)Hex(3)Fuc(2)NeuAc(2)
10	5710; 5733; 5742; 18745; 25109; 25363; 38558; 57701; 57703; 57706; 64915; 76896; 81984; 87934; 98258; 98260; 103988; 104147; 107200; 107203; 115180; 115182; 126093; 130902; 130904; 136914; 136968; 137114; 137115; 137123; 137125; 143554	36.7000; 36.8900; 37.0000; 36.6100; 34.5700; 36.5600; 36.5900; 36.6300; 36.6800; 36.5300; 36.6000; 36.0800; 36.5100; 35.9700; 36.0000; 36.5000; 38.2100; 36.1600; 36.2200; 35.9100; 36.0700; 35.9500; 36.2300; 37.7900; 37.8000; 37.9200; 37.9300; 35.8700	11523; 11595; 11639; 13307; 11235; 11976; 13476; 13515; 13522; 13540; 12241; 12446; 11244; 11272; 11068; 11080; 12143; 12775; 11352; 11392; 11210; 11234; 11420; 11228; 11231; 11465; 11565; 12160; 12163; 12208; 12211; 11486	sp|P01876|IGHA1_HUMAN Immunoglobulin heavy constant alpha 1_tailpiece.peptide	P01876	N,M	9,14	340	L.AGKPTHVnVSVVmAEVDGTCY.-	HexNAc(4)Hex(7)NeuAc(1)	Uncertain			SA	a	4486.8373; 4486.8318; 4486.8301; 4486.8347; 4486.8311; 4486.8363; 4486.8326; 4486.8387; 4486.8336; 4486.8389; 4486.8380; 4486.8378; 4486.8362; 4486.8326; 4486.8366; 4486.8373; 4486.8363; 4486.8368; 4486.8384; 4486.8377; 4486.8394; 4486.8332; 4486.8349; 4486.8377; 4486.8377; 4486.8333; 4486.8371; 4486.8314; 4486.8314; 4486.8279; 4486.8279; 4486.8406	NGlycan/2237.7827; Oxidation/15.9949	2	a_hIgA-SA-GLTrFASP-FZpipHILIC_E2_step.raw_20240829_noglyc_spec_cut; b_hIgA-SA-GLTrFASP-FZpipHILIC_E1_step.raw_20240829_noglyc_spec_cut; b_hIgA-SA-GLTrFASP-FZpipHILIC_E2_step.raw_20240829_noglyc_spec_cut; c_hIgA-SA-GLTrFASP-FZpipHILIC_E1_step.raw_20240829_noglyc_spec_cut; d_hIgA-SA-GLTrFASP-FZpipHILIC_E1_step.raw_20240829_noglyc_spec_cut; d_hIgA-SA-GLTrFASP-FZpipHILIC_E2_step.raw_20240829_noglyc_s…	135.37	2.60e-03 - 3.58e-01		2	35.93 - 36.76	3	8,13	2	22	2.71e-03 - 3.68e-01	13.1 - 119.1	1.1 - 25.5	1496.6197; 1496.6179; 1496.6173; 1496.6189; 1496.6176; 1496.6194; 1496.6182; 1496.6202; 1496.6185; 1496.6202; 1496.6199; 1496.6199; 1496.6193; 1496.6181; 1496.6195; 1496.6197; 1496.6194; 1496.6195; 1496.6201; 1496.6198; 1496.6204; 1496.6183; 1496.6189; 1496.6199; 1496.6199; 1496.6184; 1496.6196; 1496.6177; 1496.6177; 1496.6166; 1496.6166; 1496.6208	1496.62	2.00; 0.77; 0.39; 1.43; 0.62; 1.78; 0.96; 2.32; 1.19; 2.35; 2.15; 2.11; 1.76; 0.96; 1.84; 1.99; 1.78; 1.88; 2.25; 2.09; 2.47; 1.09; 1.46; 2.10; 2.10; 1.10; 1.95; 0.68; 0.68; -0.09; -0.09; 2.73	-1 - 1	4486.83	1; 3; 4; 6; 9; 10; 12; 13; 14; 16; 17; 18; 19; 21; 22; 23; 24	7.504e+05 - 9.035e+06	35.93 - 36.76	1; 3; 4; 6; 9; 10; 12; 13; 14; 16; 17; 18; 19; 21; 22; 23; 24-11523	HexNAc(4)Hex(7)NeuAc(1)
10.1	76896	36.6000	12446	sp|P01876|IGHA1_HUMAN Immunoglobulin heavy constant alpha 1_tailpiece.peptide	P01876	N,M	9,14	340	L.AGKPTHVnVSVVmAEVDGTCY.-	HexNAc(4)Hex(7)NeuAc(1)	Uncertain			SA	a	4486.8378	NGlycan/2237.7827; Oxidation/15.9949	1	a_hIgA-SA-GLTrFASP-FZpipHILIC_E1_step.raw_20240829_noglyc_spec_cut	117.99	0.065	57300000	2	36.66	3	8,13	2	22	0.067	93.4	1.8	1496.6199	1496.62	2.11	-1	4486.83	12	9.03e+06	36.66	12-12446	HexNAc(4)Hex(7)NeuAc(1)
10.2	81984	36.0800	11244	sp|P01876|IGHA1_HUMAN Immunoglobulin heavy constant alpha 1_tailpiece.peptide	P01876	N,M	9,14	340	L.AGKPTHVnVSVVmAEVDGTCY.-	HexNAc(4)Hex(7)NeuAc(1)	Uncertain			AR	d	4486.8362	NGlycan/2237.7827; Oxidation/15.9949	1	d_hIgA-AR-GLTrFASP-FZpipHILIC_217mAbs-Dil1-5_D_step.raw_20240829_noglyc_spec_cut	121.21	0.065	21200000	2	36.06	3	8,13	2	22	0.068	119.1	19.3	1496.6193	1496.62	1.76	-1	4486.83	13	2.02e+06	36.06	13-11244	HexNAc(4)Hex(7)NeuAc(1)
10.3	87934	36.5100	11272	sp|P01876|IGHA1_HUMAN Immunoglobulin heavy constant alpha 1_tailpiece.peptide	P01876	N,M	9,14	340	L.AGKPTHVnVSVVmAEVDGTCY.-	HexNAc(4)Hex(7)NeuAc(1)	Uncertain			AR	a	4486.8326	NGlycan/2237.7827; Oxidation/15.9949	1	a_hIgA-AR-GLTrFASP-FZpipHILIC_8mAbs_E2_step.raw_20240829_noglyc_spec_cut	103.9	0.04	8960000	2	36.53	3	8,13	2	22	0.041	103.9	11.0	1496.6181	1496.62	0.96	-1	4486.83	14	7.5e+05	36.53	14-11272	HexNAc(4)Hex(7)NeuAc(1)
10.4	98258; 98260	35.9700; 36.0000	11068; 11080	sp|P01876|IGHA1_HUMAN Immunoglobulin heavy constant alpha 1_tailpiece.peptide	P01876	N,M	9,14	340	L.AGKPTHVnVSVVmAEVDGTCY.-	HexNAc(4)Hex(7)NeuAc(1)	Uncertain			AR	a	4486.8366; 4486.8373	NGlycan/2237.7827; Oxidation/15.9949	1	a_hIgA-AR-GLTrFASP-FZpipHILIC_218mAbs-Dil1-5_D_step.raw_20240829_noglyc_spec_cut	135.37	6.15e-02 - 6.32e-02	16400000	2	36.05	3	8,13	2	22	6.41e-02 - 6.58e-02	88.9 - 116.3	10.7 - 20.1	1496.6195; 1496.6197	1496.62	1.84; 1.99	-1	4486.83	16	1.56e+06	36.05	16-11068	HexNAc(4)Hex(7)NeuAc(1)
10.4.1	98260	36.0000	11080	sp|P01876|IGHA1_HUMAN Immunoglobulin heavy constant alpha 1_tailpiece.peptide	P01876	N,M	9,14	340	L.AGKPTHVnVSVVmAEVDGTCY.-	HexNAc(4)Hex(7)NeuAc(1)	Uncertain			AR	a	4486.8373	NGlycan/2237.7827; Oxidation/15.9949	0	a_hIgA-AR-GLTrFASP-FZpipHILIC_218mAbs-Dil1-5_D_step.raw_20240829_noglyc_spec_cut	135.37	0.062	16400000	2	36.05	3	8,13	2	22	0.064	116.3	20.1	1496.6197	1496.62	1.99	-1	4486.83	16	1.56e+06	36.05	16-11080	HexNAc(4)Hex(7)NeuAc(1)
10.5	107200; 107203	35.9700; 36.0800	11352; 11392	sp|P01876|IGHA1_HUMAN Immunoglobulin heavy constant alpha 1_tailpiece.peptide	P01876	N,M	9,14	340	L.AGKPTHVnVSVVmAEVDGTCY.-	HexNAc(4)Hex(7)NeuAc(1)	Uncertain			AR	b	4486.8384; 4486.8377	NGlycan/2237.7827; Oxidation/15.9949	1	b_hIgA-AR-GLTrFASP-FZpipHILIC_47mAbs_E1_step.raw_20240829_noglyc_spec_cut	114.49	1.11e-01 - 1.74e-01	33300000	2	36.02	3	8,13	2	22	1.16e-01 - 1.81e-01	30.0 - 114.5	10.8 - 25.5	1496.6201; 1496.6198	1496.62	2.25; 2.09	-1	4486.83	18	5.66e+06	36.02	18-11352	HexNAc(4)Hex(7)NeuAc(1)
10.6	115180; 115182	36.1600; 36.2200	11210; 11234	sp|P01876|IGHA1_HUMAN Immunoglobulin heavy constant alpha 1_tailpiece.peptide	P01876	N,M	9,14	340	L.AGKPTHVnVSVVmAEVDGTCY.-	HexNAc(4)Hex(7)NeuAc(1)	Uncertain			AR	b	4486.8394; 4486.8332	NGlycan/2237.7827; Oxidation/15.9949	1	b_hIgA-AR-GLTrFASP-FZpipHILIC_214mAbs-Dil1-5_D_step.raw_20240829_noglyc_spec_cut	104.92	1.16e-02 - 1.00e-01	21100000	2	36.15	3	8,13	2	22	1.21e-02 - 1.04e-01	30.0 - 104.9	10.8 - 21.4	1496.6204; 1496.6183	1496.62	2.47; 1.09	-1	4486.83	19	2.37e+06	36.15	19-11210	HexNAc(4)Hex(7)NeuAc(1)
10.6.1	115182	36.2200	11234	sp|P01876|IGHA1_HUMAN Immunoglobulin heavy constant alpha 1_tailpiece.peptide	P01876	N,M	9,14	340	L.AGKPTHVnVSVVmAEVDGTCY.-	HexNAc(4)Hex(7)NeuAc(1)	Uncertain			AR	b	4486.8332	NGlycan/2237.7827; Oxidation/15.9949	0	b_hIgA-AR-GLTrFASP-FZpipHILIC_214mAbs-Dil1-5_D_step.raw_20240829_noglyc_spec_cut	104.92	0.012	21100000	2	36.15	3	8,13	2	22	0.012	104.9	21.4	1496.6183	1496.62	1.09	-1	4486.83	19	2.37e+06	36.15	19-11234	HexNAc(4)Hex(7)NeuAc(1)
10.7	136914; 136968; 137114; 137115; 137123; 137125	35.9500; 36.2300; 37.7900; 37.8000; 37.9200; 37.9300	11465; 11565; 12160; 12163; 12208; 12211	sp|P01876|IGHA1_HUMAN Immunoglobulin heavy constant alpha 1_tailpiece.peptide	P01876	N,M	9,14	340	L.AGKPTHVnVSVVmAEVDGTCY.-	HexNAc(4)Hex(7)NeuAc(1)	Uncertain			AR	d	4486.8333; 4486.8371; 4486.8314; 4486.8314; 4486.8279; 4486.8279	NGlycan/2237.7827; Oxidation/15.9949	1	d_hIgA-AR-GLTrFASP-FZpipHILIC_16mAbs_E2_step.raw_20240829_noglyc_spec_cut	115.11	2.60e-03 - 3.54e-01	102000000	2	36.26	3	8,13	2	22	2.71e-03 - 3.64e-01	30.0 - 92.3	1.1 - 22.2	1496.6184; 1496.6196; 1496.6177; 1496.6177; 1496.6166; 1496.6166	1496.62	1.10; 1.95; 0.68; 0.68; -0.09; -0.09	-1 - 1	4486.83	23	5.98e+06	36.26	23-11465	HexNAc(4)Hex(7)NeuAc(1)
11	5872; 6053; 6083; 6125; 18816; 18888; 18892; 18906; 18912; 19081; 25517; 25524; 25533; 25674; 25706; 25754; 25806; 31724; 38626; 38707; 38708; 38718; 38727; 38735; 38765; 38916; 45432; 45462; 45575; 45609; 57758; 57829; 57835; 65089; 65137; 65260; 65289; 65319; 65357; 77046; 77056; 77115; 77253; 82026; 82028; 82031; 88012; 88243; 88274; 88309; 88311; 93652; 93658; 93667; 98284; 98289; 104060; 104…	38.6400; 40.8200; 41.1500; 41.4500; 38.7600; 40.8100; 41.1000; 41.3200; 41.3900; 53.5100; 38.4700; 38.5300; 38.7200; 40.6400; 40.9300; 41.3100; 41.7000; 40.9200; 38.6600; 40.7900; 41.1100; 41.2700; 41.3800; 41.8600; 53.5400; 38.4300; 38.9900; 40.6700; 40.9600; 38.6800; 41.1300; 39.0200; 39.5400; 40.9500; 41.2400; 41.5500; 40.7800; 41.0500; 41.9800; 53.5300; 40.1600; 40.3000; 40.4400; 37.2900; 39.…	12263; 13071; 13190; 13298; 14156; 14962; 15076; 15161; 15188; 19758; 12695; 12717; 12789; 13487; 13593; 13724; 13864; 14633; 14294; 15131; 15141; 15257; 15318; 15365; 15553; 19919; 12749; 12954; 13558; 13665; 14333; 15166; 15291; 13206; 13403; 13828; 13937; 14042; 14160; 14089; 14194; 14557; 18899; 12814; 12871; 12923; 11559; 12386; 12481; 12577; 12579; 12760; 12868; 12937; 12639; 12657; 12395; …	sp|P01876|IGHA1_HUMAN Immunoglobulin heavy constant alpha 1_tailpiece.peptide	P01876	N,M	9,14	340	L.AGKPTHVnVSVVmAEVDGTCY.-	HexNAc(5)Hex(6)Fuc(1)NeuAc(2)	Uncertain			SA	a	4981.0032; 4981.0121; 4981.0118; 4981.0096; 4980.9998; 4981.0056; 4981.0126; 4981.0152; 4981.0141; 4981.0103; 4981.0109; 4981.0054; 4981.0024; 4981.0124; 4981.0104; 4981.0061; 4981.0019; 4981.0082; 4981.0070; 4981.0069; 4981.0089; 4981.0121; 4981.0052; 4981.0094; 4981.0116; 4981.0190; 4981.0172; 4981.0055; 4981.0135; 4981.0109; 4981.0007; 4981.0075; 4981.0066; 4981.0098; 4981.0218; 4981.0109; 498…	NGlycan/2715.9625; Dioxidation/31.9898	2	a_hIgA-SA-GLTrFASP-FZpipHILIC_E2_step.raw_20240829_noglyc_spec_cut; b_hIgA-SA-GLTrFASP-FZpipHILIC_E1_step.raw_20240829_noglyc_spec_cut; b_hIgA-SA-GLTrFASP-FZpipHILIC_E2_step.raw_20240829_noglyc_spec_cut; c_hIgA-SA-GLTrFASP-FZpipHILIC_D_step.raw_20240829_noglyc_spec_cut; c_hIgA-SA-GLTrFASP-FZpipHILIC_E1_step.raw_20240829_noglyc_spec_cut; c_hIgA-SA-GLTrFASP-FZpipHILIC_E2_step.raw_20240829_noglyc_sp…	104.08	1.64e-03 - 9.14e-01		2	39.70 - 40.98	4	8,13	2	22	1.72e-03 - 9.17e-01	6.0 - 104.1	2.5 - 104.1	1246.2581; 1246.2603; 1246.2602; 1246.2597; 1246.2572; 1246.2587; 1246.2604; 1246.2611; 1246.2608; 1246.2598; 1246.2600; 1246.2586; 1246.2579; 1246.2604; 1246.2599; 1246.2588; 1246.2577; 1246.2593; 1246.2590; 1246.2590; 1246.2595; 1246.2603; 1246.2586; 1246.2596; 1246.2602; 1246.2620; 1246.2616; 1246.2586; 1246.2606; 1246.2600; 1246.2574; 1246.2592; 1246.2589; 1246.2597; 1246.2627; 1246.2600; 124…	1246.26	0.01; 1.80; 1.74; 1.30; -0.67; 0.50; 1.90; 2.43; 2.21; 1.43; 1.56; 0.47; -0.13; 1.86; 1.46; 0.61; -0.25; 1.02; 0.79; 0.76; 1.15; 1.80; 0.41; 1.26; 1.70; 3.20; 2.83; 0.48; 2.08; 1.57; -0.49; 0.88; 0.70; 1.34; 3.75; 1.56; 1.08; 1.68; 0.91; 1.39; 1.52; 1.82; 2.62; 1.55; 1.07; 2.74; 1.41; 1.88; 1.81; 2.24; 2.24; 2.64; 1.67; 1.69; 2.64; 1.57; 2.64; 1.84; 2.22; 1.85; 1.95; 1.95; 1.77; 1.57; 2.59; 2.16;…	-1 - 0	4981	1; 3; 4; 5; 6; 7; 9; 10; 12; 13; 14; 15; 16; 17; 18; 19; 20; 21; 22; 23; 24	3.736e+06 - 1.028e+08	39.70 - 40.98	1; 3; 4; 5; 6; 7; 9; 10; 12; 13; 14; 15; 16; 17; 18; 19; 20; 21; 22; 23; 24-12263	HexNAc(5)Hex(6)Fuc(1)NeuAc(2)
11.1	98284; 98289	40.0800; 40.1300	12639; 12657	sp|P01876|IGHA1_HUMAN Immunoglobulin heavy constant alpha 1_tailpiece.peptide	P01876	N,M	9,14	340	L.AGKPTHVnVSVVmAEVDGTCY.-	HexNAc(5)Hex(6)Fuc(1)NeuAc(2)	Uncertain			AR	a	4981.0163; 4981.0109	NGlycan/2715.9625; Dioxidation/31.9898	1	a_hIgA-AR-GLTrFASP-FZpipHILIC_218mAbs-Dil1-5_D_step.raw_20240829_noglyc_spec_cut	104.08	1.37e-02 - 1.44e-02	72300000	2	40.13	4	8,13	2	22	1.43e-02 - 1.50e-02	46.1 - 104.1	46.1 - 104.1	1246.2613; 1246.2600	1246.26	2.64; 1.57	-1	4981	16	9.6e+06	40.13	16-12639	HexNAc(5)Hex(6)Fuc(1)NeuAc(2)
12	102617; 135395	44.1700; 44.2600	14844; 14422	sp|P01833|PIGR_HUMAN Polymeric immunoglobulin receptor OS=Homo sapiens OX=9606 GN=PIGR PE=1 SV=4	P01833	N,Q	90,102	90	R.ANLTNFPEnGTFVVNIAQLSqDDSGR.Y	HexNAc(4)Hex(5)Fuc(3)NeuAc(1)	Uncertain			AR	b	5159.2083; 5159.2109	NGlycan/2351.8508; Deamidated/0.9840	2	b_hIgA-AR-GLTrFASP-FZpipHILIC_11mAbs_E2_step.raw_20240829_noglyc_spec_cut; d_hIgA-AR-GLTrFASP-FZpipHILIC_16mAbs_E2_step.raw_20240829_noglyc_spec_cut	145.2	4.28e-02 - 8.30e-01		0	44.16 - 44.22	4	9,21	82	107	2.15e-01 - 8.30e-01	58.8 - 76.1	0.0	1290.8094; 1290.8100	1290.8	4.14; 4.64	-1	5159.19	17; 23	1.743e+05 - 1.955e+05	44.16 - 44.22	17; 23-14844	HexNAc(4)Hex(5)Fuc(3)NeuAc(1)
12.1	102617	44.1700	14844	sp|P01833|PIGR_HUMAN Polymeric immunoglobulin receptor OS=Homo sapiens OX=9606 GN=PIGR PE=1 SV=4	P01833	N,Q	90,102	90	R.ANLTNFPEnGTFVVNIAQLSqDDSGR.Y	HexNAc(4)Hex(5)Fuc(3)NeuAc(1)	Uncertain			AR	b	5159.2083	NGlycan/2351.8508; Deamidated/0.9840	1	b_hIgA-AR-GLTrFASP-FZpipHILIC_11mAbs_E2_step.raw_20240829_noglyc_spec_cut	104.76	0.043	1120000	0	44.16	4	9,21	82	107	0.22	76.1	0.0	1290.8094	1290.8	4.14	-1	5159.19	17	1.96e+05	44.16	17-14844	HexNAc(4)Hex(5)Fuc(3)NeuAc(1)
12.2	135395	44.2600	14422	sp|P01833|PIGR_HUMAN Polymeric immunoglobulin receptor OS=Homo sapiens OX=9606 GN=PIGR PE=1 SV=4	P01833	N,Q	90,102	90	R.ANLTNFPEnGTFVVNIAQLSqDDSGR.Y	HexNAc(4)Hex(5)Fuc(3)NeuAc(1)	Uncertain			AR	d	5159.2109	NGlycan/2351.8508; Deamidated/0.9840	1	d_hIgA-AR-GLTrFASP-FZpipHILIC_16mAbs_E2_step.raw_20240829_noglyc_spec_cut	145.2	0.83	625000	0	44.22	4	9,21	82	107	0.83	58.8	0.0	1290.8100	1290.8	4.64	-1	5159.19	23	1.74e+05	44.22	23-14422	HexNAc(4)Hex(5)Fuc(3)NeuAc(1)
13	42314; 42316	25.3300; 25.3700	7830; 7845	sp|P0DOX4|IGE_HUMAN Immunoglobulin epsilon heavy chain OS=Homo sapiens OX=9606 PE=1 SV=1	P0DOX4	N	383	383	R.ASGKPVnHSTRKEEK.Q	HexNAc(4)Hex(5)Fuc(1)NeuAc(2)	True-positive	Replace N-glycan	HexNAc(4)Hex(5)Fuc(1)NeuAc(2)	SA	c	4018.7078; 4018.7093	NGlycan/2351.8508	2	c_hIgA-SA-GLTrFASP-FZpipHILIC_E2_step.raw_20240829_noglyc_spec_cut	230.74	9.99e-01 - 1.00e+00	15800000	2	25.31	3	7	377	391	1.00e+00 - 1.00e+00	58.3 - 114.2	1.4 - 5.9	1340.5765; 1340.5771	1340.58	-4.50; -4.10	-1 - 0	4018.73	7	1.52e+06	25.31	7-7830	HexNAc(4)Hex(5)Fuc(3)NeuAc(1)
13.1.2	42316	25.3700	7845	sp|P0DOX4|IGE_HUMAN Immunoglobulin epsilon heavy chain OS=Homo sapiens OX=9606 PE=1 SV=1	P0DOX4	N	383	383	R.ASGKPVnHSTRKEEK.Q	HexNAc(4)Hex(5)Fuc(1)NeuAc(2)	True-positive	Replace N-glycan	HexNAc(4)Hex(5)Fuc(1)NeuAc(2)	SA	c	4018.7093	NGlycan/2351.8508	0	c_hIgA-SA-GLTrFASP-FZpipHILIC_E2_step.raw_20240829_noglyc_spec_cut	230.74	1	15800000	2	25.31	3	7	377	391	1	114.2	1.4	1340.5771	1340.58	-4.10	0	4018.73	7	1.52e+06	25.31	7-7845	HexNAc(4)Hex(5)Fuc(3)NeuAc(1)
14	2564; 22358; 22363; 42310	25.5400; 25.2700; 25.3300; 25.2800	7241; 7700; 7723; 7815	sp|P0DOX4|IGE_HUMAN Immunoglobulin epsilon heavy chain OS=Homo sapiens OX=9606 PE=1 SV=1	P0DOX4	N	383	383	R.ASGKPVnHSTRKEEK.Q	HexNAc(5)Hex(5)Fuc(1)NeuAc(2)	Uncertain			SA	a	4220.7829; 4220.7842; 4220.7847; 4220.7856	NGlycan/2553.9097	2	a_hIgA-SA-GLTrFASP-FZpipHILIC_E2_step.raw_20240829_noglyc_spec_cut; b_hIgA-SA-GLTrFASP-FZpipHILIC_E2_step.raw_20240829_noglyc_spec_cut; c_hIgA-SA-GLTrFASP-FZpipHILIC_E2_step.raw_20240829_noglyc_spec_cut	192.66	7.61e-01 - 1.00e+00		2	25.31 - 25.51	3	7	377	391	9.30e-01 - 1.00e+00	36.3 - 97.1	36.3 - 97.1	1407.9349; 1407.9354; 1407.9355; 1407.9358	1407.94	-0.44; -0.13; -0.03; 0.20	-1 - 0	4220.78	1; 4; 7	1.334e+06 - 2.394e+06	25.31 - 25.51	1; 4; 7-7241	HexNAc(5)Hex(5)Fuc(1)NeuAc(2)
14.1	2564	25.5400	7241	sp|P0DOX4|IGE_HUMAN Immunoglobulin epsilon heavy chain OS=Homo sapiens OX=9606 PE=1 SV=1	P0DOX4	N	383	383	R.ASGKPVnHSTRKEEK.Q	HexNAc(5)Hex(5)Fuc(1)NeuAc(2)	Uncertain			SA	a	4220.7829	NGlycan/2553.9097	1	a_hIgA-SA-GLTrFASP-FZpipHILIC_E2_step.raw_20240829_noglyc_spec_cut	189.07	1	22700000	2	25.51	3	7	377	391	1	60.6	60.6	1407.9349	1407.94	-0.44	0	4220.78	1	2.39e+06	25.51	1-7241	HexNAc(5)Hex(5)Fuc(1)NeuAc(2)
14.2	22358; 22363	25.2700; 25.3300	7700; 7723	sp|P0DOX4|IGE_HUMAN Immunoglobulin epsilon heavy chain OS=Homo sapiens OX=9606 PE=1 SV=1	P0DOX4	N	383	383	R.ASGKPVnHSTRKEEK.Q	HexNAc(5)Hex(5)Fuc(1)NeuAc(2)	Uncertain			SA	b	4220.7842; 4220.7847	NGlycan/2553.9097	1	b_hIgA-SA-GLTrFASP-FZpipHILIC_E2_step.raw_20240829_noglyc_spec_cut	182.42	9.99e-01 - 1.00e+00	13600000	2	25.32	3	7	377	391	1.00e+00 - 1.00e+00	36.3 - 67.5	36.3 - 67.5	1407.9354; 1407.9355	1407.94	-0.13; -0.03	-1	4220.78	4	1.48e+06	25.32	4-7700	HexNAc(5)Hex(5)Fuc(1)NeuAc(2)
14.2.2	22363	25.3300	7723	sp|P0DOX4|IGE_HUMAN Immunoglobulin epsilon heavy chain OS=Homo sapiens OX=9606 PE=1 SV=1	P0DOX4	N	383	383	R.ASGKPVnHSTRKEEK.Q	HexNAc(5)Hex(5)Fuc(1)NeuAc(2)	Uncertain			SA	b	4220.7847	NGlycan/2553.9097	0	b_hIgA-SA-GLTrFASP-FZpipHILIC_E2_step.raw_20240829_noglyc_spec_cut	182.42	1	13600000	2	25.32	3	7	377	391	1	67.5	67.5	1407.9355	1407.94	-0.03	-1	4220.78	4	1.48e+06	25.32	4-7723	HexNAc(5)Hex(5)Fuc(1)NeuAc(2)
14.3	42310	25.2800	7815	sp|P0DOX4|IGE_HUMAN Immunoglobulin epsilon heavy chain OS=Homo sapiens OX=9606 PE=1 SV=1	P0DOX4	N	383	383	R.ASGKPVnHSTRKEEK.Q	HexNAc(5)Hex(5)Fuc(1)NeuAc(2)	Uncertain			SA	c	4220.7856	NGlycan/2553.9097	1	c_hIgA-SA-GLTrFASP-FZpipHILIC_E2_step.raw_20240829_noglyc_spec_cut	192.66	0.76	12200000	2	25.31	3	7	377	391	0.93	97.1	97.1	1407.9358	1407.94	0.20	0	4220.78	7	1.33e+06	25.31	7-7815	HexNAc(5)Hex(5)Fuc(1)NeuAc(2)
15	62252	35.7700	11946	sp|P01877|IGHA2_HUMAN Immunoglobulin heavy constant alpha 2 OS=Homo sapiens OX=9606 GN=IGHA2 PE=1 SV=4	P01877	N	205	205	R.DLCGCYSVSSVLPGCAQPWNHGETFTCTAAHPELKTPLTAnITKSGNTFR.P	HexNAc(6)Hex(7)NeuAc(4)	Uncertain			SA	d	9067.8054	NGlycan/3517.2277	1	d_hIgA-SA-GLTrFASP-FZpipHILIC_E2_step.raw_20240829_noglyc_spec_cut	176.89	0.33	19100000	4	35.81	7	41	165	214	0.86	176.9	1.7	1296.4080	1296.41	-0.84	-1	9067.81	10	4.26e+06	35.81	10-11946	HexNAc(6)Hex(7)NeuAc(4)
16	105190; 105192	39.8400; 39.8500	13351; 13354	sp|P02751|FINC_HUMAN Fibronectin OS=Homo sapiens OX=9606 GN=FN1 PE=1 SV=5	P02751	N	528	528	R.DQCIVDDITYNVnDTFHK.R	HexNAc(4)Hex(6)Fuc(2)NeuAc(1)Sulfo(1)	Uncertain	Low b and y ions,SulfoHexNAc evidence		AR	b	4643.7881; 4643.7881	NGlycan/2447.8025	2	b_hIgA-AR-GLTrFASP-FZpipHILIC_11mAbs_E2_step.raw_20240829_noglyc_spec_cut	115.34	4.27e-04 - 1.02e-03	7080000	2	39.78	4	13	516	533	1.31e-02 - 3.08e-02	17.2 - 78.4	17.2 - 78.4	1161.9543; 1161.9543	1161.95	1.35; 1.35	0	4643.78	17	5.29e+05	39.78	17-13351	HexNAc(4)Hex(6)Fuc(2)NeuAc(1)Sulfo(1)
16.1.1	105192	39.8500	13354	sp|P02751|FINC_HUMAN Fibronectin OS=Homo sapiens OX=9606 GN=FN1 PE=1 SV=5	P02751	N	528	528	R.DQCIVDDITYNVnDTFHK.R	HexNAc(4)Hex(6)Fuc(2)NeuAc(1)Sulfo(1)	Uncertain	Low b and y ions,SulfoHexNAc evidence		AR	b	4643.7881	NGlycan/2447.8025	0	b_hIgA-AR-GLTrFASP-FZpipHILIC_11mAbs_E2_step.raw_20240829_noglyc_spec_cut	115.34	0.00043	7080000	2	39.78	4	13	516	533	0.013	78.4	78.4	1161.9543	1161.95	1.35	0	4643.78	17	5.29e+05	39.78	17-13354	HexNAc(4)Hex(6)Fuc(2)NeuAc(1)Sulfo(1)
17	93254; 142231	47.5800; 41.6900	15755; 13757	sp|P02751|FINC_HUMAN Fibronectin OS=Homo sapiens OX=9606 GN=FN1 PE=1 SV=5	P02751	Q,N	1896,1904	1904	K.DTLTSRPAqGVVTTLEnVSPPR.R	HexNAc(5)Hex(5)Fuc(1)	Uncertain			AR	a	4309.9363; 4309.9369	Deamidated/0.9840; NGlycan/1971.7189	2	a_hIgA-AR-GLTrFASP-FZpipHILIC_39mAbs_E1_step.raw_20240829_noglyc_spec_cut; d_hIgA-AR-GLTrFASP-FZpipHILIC_35mAbs_E1_step.raw_20240829_noglyc_spec_cut	112.37	4.77e-03 - 1.10e-01		0	41.65 - 47.50	4	9,17	1888	1909	3.30e-02 - 3.72e-01	10.0 - 76.6	10.0 - 76.6	1078.4914; 1078.4915	1078.49	1.07; 1.19	1	4309.93	15; 24	2.139e+04 - 2.435e+05	41.65 - 47.50	15; 24-15755	HexNAc(5)Hex(5)Fuc(1)
17.1	142231	41.6900	13757	sp|P02751|FINC_HUMAN Fibronectin OS=Homo sapiens OX=9606 GN=FN1 PE=1 SV=5	P02751	Q,N	1896,1904	1904	K.DTLTSRPAqGVVTTLEnVSPPR.R	HexNAc(5)Hex(5)Fuc(1)	Uncertain			AR	d	4309.9369	Deamidated/0.9840; NGlycan/1971.7189	1	d_hIgA-AR-GLTrFASP-FZpipHILIC_35mAbs_E1_step.raw_20240829_noglyc_spec_cut	112.37	0.0048	524000	0	41.65	4	9,17	1888	1909	0.033	76.6	76.6	1078.4915	1078.49	1.19	1	4309.93	24	2.43e+05	41.65	24-13757	HexNAc(5)Hex(5)Fuc(1)
18	84028; 133075	17.8400; 17.8600	4220; 4587	sp|P01860|IGHG3_HUMAN Immunoglobulin heavy constant gamma 3 OS=Homo sapiens OX=9606 GN=IGHG3 PE=1 SV=2	P01860	N	227	227	R.EEQYnSTFR.V	HexNAc(5)Hex(5)NeuAc(1)	Uncertain			AR	a	3289.2689; 3289.2706	NGlycan/2116.7564	2	a_hIgA-AR-GLTrFASP-FZpipHILIC_8mAbs_E2_step.raw_20240829_noglyc_spec_cut; d_hIgA-AR-GLTrFASP-FZpipHILIC_16mAbs_E2_step.raw_20240829_noglyc_spec_cut	156.35	1.57e-01 - 3.30e-01		2	17.85 - 17.85	3	5	223	231	5.12e-01 - 7.55e-01	71.5 - 112.5	71.5 - 112.5	1097.4303; 1097.4308	1097.43	0.83; 1.35	0	3289.27	14; 23	4.503e+05 - 4.541e+05	17.85 - 17.85	14; 23-4220	HexNAc(5)Hex(5)NeuAc(1)
18.1	84028	17.8400	4220	sp|P01860|IGHG3_HUMAN Immunoglobulin heavy constant gamma 3 OS=Homo sapiens OX=9606 GN=IGHG3 PE=1 SV=2	P01860	N	227	227	R.EEQYnSTFR.V	HexNAc(5)Hex(5)NeuAc(1)	Uncertain			AR	a	3289.2689	NGlycan/2116.7564	1	a_hIgA-AR-GLTrFASP-FZpipHILIC_8mAbs_E2_step.raw_20240829_noglyc_spec_cut	156.35	0.33	4540000	2	17.85	3	5	223	231	0.76	112.5	112.5	1097.4303	1097.43	0.83	0	3289.27	14	4.5e+05	17.85	14-4220	HexNAc(5)Hex(5)NeuAc(1)
18.2	133075	17.8600	4587	sp|P01860|IGHG3_HUMAN Immunoglobulin heavy constant gamma 3 OS=Homo sapiens OX=9606 GN=IGHG3 PE=1 SV=2	P01860	N	227	227	R.EEQYnSTFR.V	HexNAc(5)Hex(5)NeuAc(1)	Uncertain			AR	d	3289.2706	NGlycan/2116.7564	1	d_hIgA-AR-GLTrFASP-FZpipHILIC_16mAbs_E2_step.raw_20240829_noglyc_spec_cut	122.28	0.16	3930000	2	17.85	3	5	223	231	0.51	71.5	71.5	1097.4308	1097.43	1.35	0	3289.27	23	4.54e+05	17.85	23-4587	HexNAc(5)Hex(5)NeuAc(1)
19	100206; 100212	15.1600; 15.2500	4133; 4166	sp|P0DOX5|IGG1_HUMAN Immunoglobulin gamma-1 heavy chain OS=Homo sapiens OX=9606 PE=1 SV=2	P0DOX5	Q,N	297,299	299	R.EEqYnSTYR.V	HexNAc(3)Hex(7)Phospho(1)	Uncertain			AR	b	3013.0678; 3013.0670	Deamidated/0.9840; NGlycan/1823.5742	2	b_hIgA-AR-GLTrFASP-FZpipHILIC_11mAbs_E2_step.raw_20240829_noglyc_spec_cut	183.56	1.87e-04 - 7.72e-03	1820000	0	15.15	3	3,5	295	303	1.24e-03 - 4.74e-02	96.0 - 183.6	96.0 - 183.6	1005.3632; 1005.3629	1005.36	1.60; 1.34	0	3013.06	17	2.69e+05	15.15	17-4133	HexNAc(3)Hex(7)Phospho(1)
20	84018	17.5700	4120	sp|P0DOX5|IGG1_HUMAN Immunoglobulin gamma-1 heavy chain OS=Homo sapiens OX=9606 PE=1 SV=2	P0DOX5	Q,N	297,299	299	R.EEqYnSTYR.V	HexNAc(3)Hex(7)NeuAc(1)Phospho(1)	Uncertain			AR	a	3304.1613	Deamidated/0.9840; NGlycan/2114.6696	1	a_hIgA-AR-GLTrFASP-FZpipHILIC_8mAbs_E2_step.raw_20240829_noglyc_spec_cut	173.26	0.0012	671000	0	17.58	3	3,5	295	303	0.0082	173.3	173.3	1102.3944	1102.39	0.87	0	3304.16	14	1.63e+05	17.58	14-4120	HexNAc(3)Hex(7)NeuAc(1)Phospho(1)
21	84093	19.9000	4960	sp|P19652|A1AG2_HUMAN Alpha-1-acid glycoprotein 2 OS=Homo sapiens OX=9606 GN=ORM2 PE=1 SV=2	P19652	N	103	103	R.EnGTVSR.Y	HexNAc(2)Hex(4)	Uncertain			AR	a	1815.7428	NGlycan/1054.3700	1	a_hIgA-AR-GLTrFASP-FZpipHILIC_8mAbs_E2_step.raw_20240829_noglyc_spec_cut	127.52	1	2680000	1	19.87	2	2	102	108	1	25.7	25.7	908.8787	908.876	3.30	0	1815.74	14	4.55e+05	19.87	14-4960	HexNAc(2)Hex(4)
22	61096; 132976	14.5000; 14.9600	3865; 3533	sp|P19652|A1AG2_HUMAN Alpha-1-acid glycoprotein 2 OS=Homo sapiens OX=9606 GN=ORM2 PE=1 SV=2	P19652	N	103	103	R.EnGTVSR.Y	HexNAc(6)Hex(4)NeuAc(1)Phospho(1)	Uncertain			SA	d	2999.1126; 2999.1140	NGlycan/2237.7493	2	d_hIgA-SA-GLTrFASP-FZpipHILIC_E2_step.raw_20240829_noglyc_spec_cut; d_hIgA-AR-GLTrFASP-FZpipHILIC_16mAbs_E2_step.raw_20240829_noglyc_spec_cut	124.1	2.97e-01 - 3.08e-01		1	14.53 - 15.11	3	2	102	108	3.08e-01 - 3.25e-01	46.9 - 98.7	46.9 - 98.7	1000.7115; 1000.7120	1000.71	-1.14; -0.68	0	2999.12	10; 23	6.898e+04 - 3.362e+05	14.53 - 15.11	10; 23-3865	HexNAc(6)Hex(4)NeuAc(1)Phospho(1)
22.1	132976	14.9600	3533	sp|P19652|A1AG2_HUMAN Alpha-1-acid glycoprotein 2 OS=Homo sapiens OX=9606 GN=ORM2 PE=1 SV=2	P19652	N	103	103	R.EnGTVSR.Y	HexNAc(6)Hex(4)NeuAc(1)Phospho(1)	Uncertain			AR	d	2999.1140	NGlycan/2237.7493	1	d_hIgA-AR-GLTrFASP-FZpipHILIC_16mAbs_E2_step.raw_20240829_noglyc_spec_cut	124.1	0.31	4800000	1	15.11	3	2	102	108	0.31	98.7	98.7	1000.7120	1000.71	-0.68	0	2999.12	23	3.36e+05	15.11	23-3533	HexNAc(6)Hex(4)NeuAc(1)Phospho(1)
23	133727	28.9400	8778	sp|P01591|IGJ_HUMAN Immunoglobulin J chain OS=Homo sapiens OX=9606 GN=JCHAIN PE=1 SV=4	P01591	N	71	71	R.EnISDPTSPLR.T	HexNAc(4)Hex(6)Fuc(1)NeuAc(1)	Uncertain			AR	d	3449.4144	NGlycan/2221.7878	1	d_hIgA-AR-GLTrFASP-FZpipHILIC_16mAbs_E2_step.raw_20240829_noglyc_spec_cut	118.67	1	25200000	2	28.90	3	2	70	80	1	118.7	118.7	1150.8121	1150.81	4.97	0	3449.4	23	2.93e+06	28.90	23-8778	HexNAc(4)Hex(6)Fuc(1)NeuAc(1)
24	3242; 23006; 43012	33.0300; 32.8100	10126; 10568; 10664	sp|P01591|IGJ_HUMAN Immunoglobulin J chain OS=Homo sapiens OX=9606 GN=JCHAIN PE=1 SV=4	P01591	N	71	71	R.EnISDPTSPLR.T	HexNAc(5)Hex(5)NeuAc(2)	Uncertain			SA	a	3635.4728; 3635.4711; 3635.4751	NGlycan/2407.8518	2	a_hIgA-SA-GLTrFASP-FZpipHILIC_E2_step.raw_20240829_noglyc_spec_cut; b_hIgA-SA-GLTrFASP-FZpipHILIC_E2_step.raw_20240829_noglyc_spec_cut; c_hIgA-SA-GLTrFASP-FZpipHILIC_E2_step.raw_20240829_noglyc_spec_cut	151.3	2.50e-01 - 6.30e-01		2	32.83 - 33.04	3	2	70	80	8.79e-01 - 9.74e-01	8.0 - 86.8	8.0 - 86.8	1212.8315; 1212.8310; 1212.8323	1212.83	3.14; 2.69; 3.79	0	3635.46	1; 4; 7	2.327e+06 - 2.877e+06	32.83 - 33.04	1; 4; 7-10126	HexNAc(5)Hex(5)NeuAc(2)
24.1	3242	33.0300	10126	sp|P01591|IGJ_HUMAN Immunoglobulin J chain OS=Homo sapiens OX=9606 GN=JCHAIN PE=1 SV=4	P01591	N	71	71	R.EnISDPTSPLR.T	HexNAc(5)Hex(5)NeuAc(2)	Uncertain			SA	a	3635.4728	NGlycan/2407.8518	1	a_hIgA-SA-GLTrFASP-FZpipHILIC_E2_step.raw_20240829_noglyc_spec_cut	151.3	0.63	30300000	2	33.04	3	2	70	80	0.97	35.4	35.4	1212.8315	1212.83	3.14	0	3635.46	1	2.88e+06	33.04	1-10126	HexNAc(5)Hex(5)NeuAc(2)
25	86715; 100743; 118183; 118186; 124451	54.5100; 27.2000; 31.5700; 31.6600; 25.8900	17698; 8612; 10448; 10481; 7524	sp|P01871|IGHM_HUMAN Immunoglobulin heavy constant mu OS=Homo sapiens OX=9606 GN=IGHM PE=1 SV=4	P01871	N	209	209	K.ESDWLGQSMFTCRVDHRGLTFQQnASSMCVPDQDTAIR.V	HexNAc(4)Hex(3)Fuc(1)	Uncertain			AR	a	5887.5106; 5887.5091; 5887.5167; 5887.5083; 5887.5137	NGlycan/1444.5339	2	a_hIgA-AR-GLTrFASP-FZpipHILIC_8mAbs_E2_step.raw_20240829_noglyc_spec_cut; b_hIgA-AR-GLTrFASP-FZpipHILIC_11mAbs_E2_step.raw_20240829_noglyc_spec_cut; c_hIgA-AR-GLTrFASP-FZpipHILIC_16mAbs_E2_step.raw_20240829_noglyc_spec_cut; c_hIgA-AR-GLTrFASP-FZpipHILIC_55mAbs_E1_step.raw_20240829_noglyc_spec_cut	115.27	1.00e+00 - 1.00e+00		3	25.78 - 54.42	4	24	186	223	1.00e+00 - 1.00e+00	0.8 - 39.7	0.8 - 39.7	1472.8849; 1472.8846; 1472.8864; 1472.8843; 1472.8857	1472.89	-2.07; -2.32; -1.04; -2.46; -1.54	-1 - 1	5887.52	14; 17; 20; 21	7.849e+04 - 5.864e+07	25.78 - 54.42	14; 17; 20; 21-17698	HexNAc(4)Hex(3)Fuc(1)
25.1	118183; 118186	31.5700; 31.6600	10448; 10481	sp|P01871|IGHM_HUMAN Immunoglobulin heavy constant mu OS=Homo sapiens OX=9606 GN=IGHM PE=1 SV=4	P01871	N	209	209	K.ESDWLGQSMFTCRVDHRGLTFQQnASSMCVPDQDTAIR.V	HexNAc(4)Hex(3)Fuc(1)	Uncertain			AR	c	5887.5167; 5887.5083	NGlycan/1444.5339	1	c_hIgA-AR-GLTrFASP-FZpipHILIC_16mAbs_E2_step.raw_20240829_noglyc_spec_cut	115.27	1.00e+00 - 1.00e+00	7250000	3	31.53	4	24	186	223	1.00e+00 - 1.00e+00	18.2 - 39.7	18.2 - 39.7	1472.8864; 1472.8843	1472.89	-1.04; -2.46	-1 - 1	5887.52	20	6.33e+05	31.53	20-10448	HexNAc(4)Hex(3)Fuc(1)
26	101209; 134000; 134003	31.5400; 31.8500; 31.8900	10299; 9902; 9918	sp|P01871|IGHM_HUMAN Immunoglobulin heavy constant mu OS=Homo sapiens OX=9606 GN=IGHM PE=1 SV=4	P01871	N	209	209	K.ESDWLGQSMFTCRVDHRGLTFQQnASSMCVPDQDTAIR.V	HexNAc(4)Hex(5)NeuAc(1)	Uncertain			AR	b	6356.6860; 6356.6849; 6356.6856	NGlycan/1913.6770	2	b_hIgA-AR-GLTrFASP-FZpipHILIC_11mAbs_E2_step.raw_20240829_noglyc_spec_cut; d_hIgA-AR-GLTrFASP-FZpipHILIC_16mAbs_E2_step.raw_20240829_noglyc_spec_cut	212.51	1.00e+00 - 1.00e+00		3	31.49 - 31.86	5	24	186	223	1.00e+00 - 1.00e+00	12.4 - 212.5	12.4 - 35.9	1272.3445; 1272.3443; 1272.3444	1272.34	3.15; 2.99; 3.09	0 - 1	6356.67	17; 23	1.626e+06 - 1.718e+06	31.49 - 31.86	17; 23-10299	HexNAc(4)Hex(5)NeuAc(1)
26.1	134000; 134003	31.8500; 31.8900	9902; 9918	sp|P01871|IGHM_HUMAN Immunoglobulin heavy constant mu OS=Homo sapiens OX=9606 GN=IGHM PE=1 SV=4	P01871	N	209	209	K.ESDWLGQSMFTCRVDHRGLTFQQnASSMCVPDQDTAIR.V	HexNAc(4)Hex(5)NeuAc(1)	Uncertain			AR	d	6356.6849; 6356.6856	NGlycan/1913.6770	1	d_hIgA-AR-GLTrFASP-FZpipHILIC_16mAbs_E2_step.raw_20240829_noglyc_spec_cut	212.51	1.00e+00 - 1.00e+00	20600000	3	31.86	5	24	186	223	1.00e+00 - 1.00e+00	30.0 - 212.5	30.0 - 35.9	1272.3443; 1272.3444	1272.34	2.99; 3.09	0	6356.67	23	1.72e+06	31.86	23-9902	HexNAc(4)Hex(5)NeuAc(1)
26.1.1	134003	31.8900	9918	sp|P01871|IGHM_HUMAN Immunoglobulin heavy constant mu OS=Homo sapiens OX=9606 GN=IGHM PE=1 SV=4	P01871	N	209	209	K.ESDWLGQSMFTCRVDHRGLTFQQnASSMCVPDQDTAIR.V	HexNAc(4)Hex(5)NeuAc(1)	Uncertain			AR	d	6356.6856	NGlycan/1913.6770	0	d_hIgA-AR-GLTrFASP-FZpipHILIC_16mAbs_E2_step.raw_20240829_noglyc_spec_cut	212.51	1	20600000	3	31.86	5	24	186	223	1	212.5	35.9	1272.3444	1272.34	3.09	0	6356.67	23	1.72e+06	31.86	23-9918	HexNAc(4)Hex(5)NeuAc(1)
27	4206; 44001; 44003	45.1400; 45.1700; 45.2000	14624; 15171; 15180	sp|P0DP01|HV108_HUMAN Immunoglobulin heavy variable 1-8 OS=Homo sapiens OX=9606 GN=IGHV1-8 PE=1 SV=1	P0DP01	N,M	92,100	92	K.FQGRVTMTRnTSISTAYmELSSLR.S	HexNAc(4)Hex(5)Fuc(1)NeuAc(2)	True-positive	Replace N-glycan,Low b and y ions	HexNAc(4)Hex(5)Fuc(1)NeuAc(2)	SA	a	5132.2158; 5132.2210; 5132.2176	NGlycan/2351.8508; Dioxidation/31.9898	2	a_hIgA-SA-GLTrFASP-FZpipHILIC_E2_step.raw_20240829_noglyc_spec_cut; c_hIgA-SA-GLTrFASP-FZpipHILIC_E2_step.raw_20240829_noglyc_spec_cut	209.88	6.22e-01 - 9.91e-01		3	45.14 - 45.17	4	10,18	83	106	6.22e-01 - 9.97e-01	12.4 - 99.8	0.7	1284.0612; 1284.0625; 1284.0617	1284.06	1.27; 2.29; 1.62	-1	5132.21	1; 7	2.682e+05 - 6.824e+05	45.14 - 45.17	1; 7-14624	HexNAc(4)Hex(5)Fuc(3)NeuAc(1)
27.1	4206	45.1400	14624	sp|P0DP01|HV108_HUMAN Immunoglobulin heavy variable 1-8 OS=Homo sapiens OX=9606 GN=IGHV1-8 PE=1 SV=1	P0DP01	N,M	92,100	92	K.FQGRVTMTRnTSISTAYmELSSLR.S	HexNAc(4)Hex(5)Fuc(1)NeuAc(2)	True-positive	Replace N-glycan,Low b and y ions	HexNAc(4)Hex(5)Fuc(1)NeuAc(2)	SA	a	5132.2158	NGlycan/2351.8508; Dioxidation/31.9898	1	a_hIgA-SA-GLTrFASP-FZpipHILIC_E2_step.raw_20240829_noglyc_spec_cut	209.88	0.99	4640000	3	45.17	4	10,18	83	106	1	12.4	0.7	1284.0612	1284.06	1.27	-1	5132.21	1	6.82e+05	45.17	1-14624	HexNAc(4)Hex(5)Fuc(3)NeuAc(1)
27.2	44001; 44003	45.1700; 45.2000	15171; 15180	sp|P0DP01|HV108_HUMAN Immunoglobulin heavy variable 1-8 OS=Homo sapiens OX=9606 GN=IGHV1-8 PE=1 SV=1	P0DP01	N,M	92,100	92	K.FQGRVTMTRnTSISTAYmELSSLR.S	HexNAc(4)Hex(5)Fuc(1)NeuAc(2)	True-positive	Replace N-glycan,Low b and y ions	HexNAc(4)Hex(5)Fuc(1)NeuAc(2)	SA	c	5132.2210; 5132.2176	NGlycan/2351.8508; Dioxidation/31.9898	1	c_hIgA-SA-GLTrFASP-FZpipHILIC_E2_step.raw_20240829_noglyc_spec_cut	147.76	0.62	1880000	3	45.14	4	10,18	83	106	0.62	93.6 - 99.8	0.7	1284.0625; 1284.0617	1284.06	2.29; 1.62	-1	5132.21	7	2.68e+05	45.14	7-15171	HexNAc(4)Hex(5)Fuc(3)NeuAc(1)
27.2.2	44003	45.2000	15180	sp|P0DP01|HV108_HUMAN Immunoglobulin heavy variable 1-8 OS=Homo sapiens OX=9606 GN=IGHV1-8 PE=1 SV=1	P0DP01	N,M	92,100	92	K.FQGRVTMTRnTSISTAYmELSSLR.S	HexNAc(4)Hex(5)Fuc(1)NeuAc(2)	True-positive	Replace N-glycan,Low b and y ions	HexNAc(4)Hex(5)Fuc(1)NeuAc(2)	SA	c	5132.2176	NGlycan/2351.8508; Dioxidation/31.9898	0	c_hIgA-SA-GLTrFASP-FZpipHILIC_E2_step.raw_20240829_noglyc_spec_cut	126.6	0.62	1880000	3	45.14	4	10,18	83	106	0.62	93.6	0.7	1284.0617	1284.06	1.62	-1	5132.21	7	2.68e+05	45.14	7-15180	HexNAc(4)Hex(5)Fuc(3)NeuAc(1)
28	23963; 63007	45.1000; 45.1100	15080; 15483	sp|P0DP01|HV108_HUMAN Immunoglobulin heavy variable 1-8 OS=Homo sapiens OX=9606 GN=IGHV1-8 PE=1 SV=1	P0DP01	M,N	89,92	92	K.FQGRVTmTRnTSISTAYMELSSLR.S	HexNAc(4)Hex(5)Fuc(1)NeuAc(2)	True-positive	Replace N-glycan	HexNAc(4)Hex(5)Fuc(1)NeuAc(2)	SA	b	5132.2172; 5132.2181	Dioxidation/31.9898; NGlycan/2351.8508	2	b_hIgA-SA-GLTrFASP-FZpipHILIC_E2_step.raw_20240829_noglyc_spec_cut; d_hIgA-SA-GLTrFASP-FZpipHILIC_E2_step.raw_20240829_noglyc_spec_cut	230.28	6.51e-01 - 9.98e-01		3	45.14 - 45.15	4	7,10	83	106	6.51e-01 - 9.98e-01	36.7 - 92.8	4.5 - 20.0	1284.0616; 1284.0618	1284.06	1.54; 1.72	-1	5132.21	4; 10	5.089e+05 - 1.845e+06	45.14 - 45.15	4; 10-15080	HexNAc(4)Hex(5)Fuc(3)NeuAc(1)
28.1	23963	45.1000	15080	sp|P0DP01|HV108_HUMAN Immunoglobulin heavy variable 1-8 OS=Homo sapiens OX=9606 GN=IGHV1-8 PE=1 SV=1	P0DP01	M,N	89,92	92	K.FQGRVTmTRnTSISTAYMELSSLR.S	HexNAc(4)Hex(5)Fuc(1)NeuAc(2)	True-positive	Replace N-glycan	HexNAc(4)Hex(5)Fuc(1)NeuAc(2)	SA	b	5132.2172	Dioxidation/31.9898; NGlycan/2351.8508	1	b_hIgA-SA-GLTrFASP-FZpipHILIC_E2_step.raw_20240829_noglyc_spec_cut	199.63	0.65	3330000	3	45.14	4	7,10	83	106	0.65	92.8	4.5	1284.0616	1284.06	1.54	-1	5132.21	4	5.09e+05	45.14	4-15080	HexNAc(4)Hex(5)Fuc(3)NeuAc(1)
28.2	63007	45.1100	15483	sp|P0DP01|HV108_HUMAN Immunoglobulin heavy variable 1-8 OS=Homo sapiens OX=9606 GN=IGHV1-8 PE=1 SV=1	P0DP01	M,N	89,92	92	K.FQGRVTmTRnTSISTAYMELSSLR.S	HexNAc(4)Hex(5)Fuc(1)NeuAc(2)	True-positive	Replace N-glycan	HexNAc(4)Hex(5)Fuc(1)NeuAc(2)	SA	d	5132.2181	Dioxidation/31.9898; NGlycan/2351.8508	1	d_hIgA-SA-GLTrFASP-FZpipHILIC_E2_step.raw_20240829_noglyc_spec_cut	230.28	1	10300000	3	45.15	4	7,10	83	106	1	36.7	20.0	1284.0618	1284.06	1.72	-1	5132.21	10	1.84e+06	45.15	10-15483	HexNAc(4)Hex(5)Fuc(3)NeuAc(1)
29	16501; 36339	40.3000; 40.2700	14761; 14927	sp|Q96PD5|PGRP2_HUMAN N-acetylmuramoyl-L-alanine amidase OS=Homo sapiens OX=9606 GN=PGLYRP2 PE=1 SV=1	Q96PD5	N	485	485	R.GFGVAIVGnYTAALPTEAALRTVR.D	HexNAc(5)Hex(5)	Uncertain			SA	b	4271.9756; 4271.9750	NGlycan/1825.6610	2	b_hIgA-SA-GLTrFASP-FZpipHILIC_E1_step.raw_20240829_noglyc_spec_cut; c_hIgA-SA-GLTrFASP-FZpipHILIC_E1_step.raw_20240829_noglyc_spec_cut	112.82	1.00e+00 - 1.00e+00		2	40.38 - 40.39	4	9	477	500	1.00e+00 - 1.00e+00	12.2 - 85.7	12.2 - 85.7	1069.0012; 1069.0010	1069.01	-4.36; -4.51	0	4271.99	3; 6	3.316e+06 - 3.825e+06	40.38 - 40.39	3; 6-14761	HexNAc(5)Hex(5)
29.1	16501	40.3000	14761	sp|Q96PD5|PGRP2_HUMAN N-acetylmuramoyl-L-alanine amidase OS=Homo sapiens OX=9606 GN=PGLYRP2 PE=1 SV=1	Q96PD5	N	485	485	R.GFGVAIVGnYTAALPTEAALRTVR.D	HexNAc(5)Hex(5)	Uncertain			SA	b	4271.9756	NGlycan/1825.6610	1	b_hIgA-SA-GLTrFASP-FZpipHILIC_E1_step.raw_20240829_noglyc_spec_cut	112.82	1	27900000	2	40.38	4	9	477	500	1	85.7	85.7	1069.0012	1069.01	-4.36	0	4271.99	3	3.83e+06	40.38	3-14761	HexNAc(5)Hex(5)
30	16493; 55896; 74983; 105761; 142099; 142104	40.1300; 40.2000; 40.4400; 40.0900; 39.7800; 39.8600	14695; 14929; 13954; 12966; 13020; 13050	sp|Q96PD5|PGRP2_HUMAN N-acetylmuramoyl-L-alanine amidase OS=Homo sapiens OX=9606 GN=PGLYRP2 PE=1 SV=1	Q96PD5	N	485	485	R.GFGVAIVGnYTAALPTEAALRTVR.D	HexNAc(6)Hex(4)	Uncertain			SA	b	4313.0089; 4313.0064; 4313.0027; 4313.0033; 4313.0019; 4313.0102	NGlycan/1866.6875	2	b_hIgA-SA-GLTrFASP-FZpipHILIC_E1_step.raw_20240829_noglyc_spec_cut; d_hIgA-SA-GLTrFASP-FZpipHILIC_E1_step.raw_20240829_noglyc_spec_cut; a_hIgA-SA-GLTrFASP-FZpipHILIC_E1_step.raw_20240829_noglyc_spec_cut; b_hIgA-AR-GLTrFASP-FZpipHILIC_47mAbs_E1_step.raw_20240829_noglyc_spec_cut; d_hIgA-AR-GLTrFASP-FZpipHILIC_35mAbs_E1_step.raw_20240829_noglyc_spec_cut	136.44	9.93e-01 - 1.00e+00		2	39.82 - 40.40	3	9	477	500	9.99e-01 - 1.00e+00	2.6 - 108.8	2.6 - 108.8	1438.6769; 1438.6761; 1438.6748; 1438.6750; 1438.6746; 1438.6774	1438.68	-2.74; -3.34; -4.19; -4.06; -4.39; -2.44	-1 - 1	4313.02	3; 9; 12; 18; 24	2.477e+06 - 1.804e+07	39.82 - 40.40	3; 9; 12; 18; 24-14695	HexNAc(6)Hex(4)
30.1	16493	40.1300	14695	sp|Q96PD5|PGRP2_HUMAN N-acetylmuramoyl-L-alanine amidase OS=Homo sapiens OX=9606 GN=PGLYRP2 PE=1 SV=1	Q96PD5	N	485	485	R.GFGVAIVGnYTAALPTEAALRTVR.D	HexNAc(6)Hex(4)	Uncertain			SA	b	4313.0089	NGlycan/1866.6875	1	b_hIgA-SA-GLTrFASP-FZpipHILIC_E1_step.raw_20240829_noglyc_spec_cut	136.44	1	223000000	2	40.23	3	9	477	500	1	2.6	2.6	1438.6769	1438.68	-2.74	0	4313.02	3	1.71e+07	40.23	3-14695	HexNAc(6)Hex(4)
30.2	74983	40.4400	13954	sp|Q96PD5|PGRP2_HUMAN N-acetylmuramoyl-L-alanine amidase OS=Homo sapiens OX=9606 GN=PGLYRP2 PE=1 SV=1	Q96PD5	N	485	485	R.GFGVAIVGnYTAALPTEAALRTVR.D	HexNAc(6)Hex(4)	Uncertain			SA	a	4313.0027	NGlycan/1866.6875	1	a_hIgA-SA-GLTrFASP-FZpipHILIC_E1_step.raw_20240829_noglyc_spec_cut	108.79	1	200000000	2	40.28	3	9	477	500	1	108.8	108.8	1438.6748	1438.68	-4.19	1	4313.02	12	1.8e+07	40.28	12-13954	HexNAc(6)Hex(4)
30.3	105761	40.0900	12966	sp|Q96PD5|PGRP2_HUMAN N-acetylmuramoyl-L-alanine amidase OS=Homo sapiens OX=9606 GN=PGLYRP2 PE=1 SV=1	Q96PD5	N	485	485	R.GFGVAIVGnYTAALPTEAALRTVR.D	HexNAc(6)Hex(4)	Uncertain			AR	b	4313.0033	NGlycan/1866.6875	1	b_hIgA-AR-GLTrFASP-FZpipHILIC_47mAbs_E1_step.raw_20240829_noglyc_spec_cut	102.63	1	28700000	2	40.08	3	9	477	500	1	23.5	23.5	1438.6750	1438.68	-4.06	0	4313.02	18	3.01e+06	40.08	18-12966	HexNAc(6)Hex(4)
30.4	142099; 142104	39.7800; 39.8600	13020; 13050	sp|Q96PD5|PGRP2_HUMAN N-acetylmuramoyl-L-alanine amidase OS=Homo sapiens OX=9606 GN=PGLYRP2 PE=1 SV=1	Q96PD5	N	485	485	R.GFGVAIVGnYTAALPTEAALRTVR.D	HexNAc(6)Hex(4)	Uncertain			AR	d	4313.0019; 4313.0102	NGlycan/1866.6875	1	d_hIgA-AR-GLTrFASP-FZpipHILIC_35mAbs_E1_step.raw_20240829_noglyc_spec_cut	122.2	9.93e-01 - 9.99e-01	24500000	2	39.82	3	9	477	500	9.99e-01 - 1.00e+00	12.2 - 35.3	12.2 - 35.3	1438.6746; 1438.6774	1438.68	-4.39; -2.44	-1	4313.02	24	2.48e+06	39.82	24-13020	HexNAc(6)Hex(4)
30.4.2	142104	39.8600	13050	sp|Q96PD5|PGRP2_HUMAN N-acetylmuramoyl-L-alanine amidase OS=Homo sapiens OX=9606 GN=PGLYRP2 PE=1 SV=1	Q96PD5	N	485	485	R.GFGVAIVGnYTAALPTEAALRTVR.D	HexNAc(6)Hex(4)	Uncertain			AR	d	4313.0102	NGlycan/1866.6875	0	d_hIgA-AR-GLTrFASP-FZpipHILIC_35mAbs_E1_step.raw_20240829_noglyc_spec_cut	122.2	0.99	24500000	2	39.82	3	9	477	500	1	35.3	35.3	1438.6774	1438.68	-2.44	-1	4313.02	24	2.48e+06	39.82	24-13050	HexNAc(6)Hex(4)
31	16490; 16505; 36329; 36330; 36347; 55894; 55910; 74955; 74956; 74974; 92576; 105759; 124679; 124680; 142096; 142103	40.0700; 40.3500; 40.0900; 40.1100; 40.3800; 40.1700; 40.4500; 40.3600; 40.6200; 40.0500; 39.9100; 39.9300; 39.7600; 39.8500	14672; 14783; 14859; 14866; 14972; 14917; 15025; 13812; 13819; 13923; 13152; 12952; 12989; 12996; 13010; 13046	sp|Q96PD5|PGRP2_HUMAN N-acetylmuramoyl-L-alanine amidase OS=Homo sapiens OX=9606 GN=PGLYRP2 PE=1 SV=1	Q96PD5	N	485	485	R.GFGVAIVGnYTAALPTEAALRTVR.D	HexNAc(6)Hex(4)	Uncertain			SA	b	4313.0052; 4313.0060; 4313.0053; 4313.0062; 4313.0038; 4313.0043; 4313.0046; 4313.0049; 4313.0040; 4313.0040; 4313.0044; 4313.0039; 4313.0075; 4313.0075; 4313.0064; 4313.0068	NGlycan/1866.6875	2	b_hIgA-SA-GLTrFASP-FZpipHILIC_E1_step.raw_20240829_noglyc_spec_cut; c_hIgA-SA-GLTrFASP-FZpipHILIC_E1_step.raw_20240829_noglyc_spec_cut; d_hIgA-SA-GLTrFASP-FZpipHILIC_E1_step.raw_20240829_noglyc_spec_cut; a_hIgA-SA-GLTrFASP-FZpipHILIC_E1_step.raw_20240829_noglyc_spec_cut; a_hIgA-AR-GLTrFASP-FZpipHILIC_39mAbs_E1_step.raw_20240829_noglyc_spec_cut; b_hIgA-AR-GLTrFASP-FZpipHILIC_47mAbs_E1_step.raw_202…	112.22	7.54e-01 - 1.00e+00		2	39.82 - 40.42	4	9	477	500	9.41e-01 - 1.00e+00	2.0 - 93.9	2.0 - 93.9	1079.2586; 1079.2588; 1079.2586; 1079.2588; 1079.2582; 1079.2584; 1079.2584; 1079.2585; 1079.2583; 1079.2583; 1079.2584; 1079.2583; 1079.2591; 1079.2592; 1079.2589; 1079.2590	1079.26	-3.62; -3.43; -3.60; -3.37; -3.94; -3.81; -3.76; -3.68; -3.89; -3.89; -3.80; -3.91; -3.08; -3.07; -3.34; -3.24	-1 - 0	4313.02	3; 6; 9; 12; 15; 18; 21; 24	2.752e+06 - 4.767e+07	39.82 - 40.42	3; 6; 9; 12; 15; 18; 21; 24-14672	HexNAc(6)Hex(4)
31.1	16490; 16505	40.0700; 40.3500	14672; 14783	sp|Q96PD5|PGRP2_HUMAN N-acetylmuramoyl-L-alanine amidase OS=Homo sapiens OX=9606 GN=PGLYRP2 PE=1 SV=1	Q96PD5	N	485	485	R.GFGVAIVGnYTAALPTEAALRTVR.D	HexNAc(6)Hex(4)	Uncertain			SA	b	4313.0052; 4313.0060	NGlycan/1866.6875	1	b_hIgA-SA-GLTrFASP-FZpipHILIC_E1_step.raw_20240829_noglyc_spec_cut	102.91	1.00e+00 - 1.00e+00	563000000	2	40.23	4	9	477	500	1.00e+00 - 1.00e+00	3.3 - 17.3	3.3 - 17.3	1079.2586; 1079.2588	1079.26	-3.62; -3.43	0	4313.02	3	3.84e+07	40.23	3-14672	HexNAc(6)Hex(4)
31.2	55894; 55910	40.1700; 40.4500	14917; 15025	sp|Q96PD5|PGRP2_HUMAN N-acetylmuramoyl-L-alanine amidase OS=Homo sapiens OX=9606 GN=PGLYRP2 PE=1 SV=1	Q96PD5	N	485	485	R.GFGVAIVGnYTAALPTEAALRTVR.D	HexNAc(6)Hex(4)	Uncertain			SA	d	4313.0043; 4313.0046	NGlycan/1866.6875	1	d_hIgA-SA-GLTrFASP-FZpipHILIC_E1_step.raw_20240829_noglyc_spec_cut	100.83	1.00e+00 - 1.00e+00	456000000	2	40.40	4	9	477	500	1.00e+00 - 1.00e+00	17.4 - 35.8	17.4 - 35.8	1079.2584; 1079.2584	1079.26	-3.81; -3.76	0	4313.02	9	3.62e+07	40.40	9-14917	HexNAc(6)Hex(4)
31.3	142096; 142103	39.7600; 39.8500	13010; 13046	sp|Q96PD5|PGRP2_HUMAN N-acetylmuramoyl-L-alanine amidase OS=Homo sapiens OX=9606 GN=PGLYRP2 PE=1 SV=1	Q96PD5	N	485	485	R.GFGVAIVGnYTAALPTEAALRTVR.D	HexNAc(6)Hex(4)	Uncertain			AR	d	4313.0064; 4313.0068	NGlycan/1866.6875	1	d_hIgA-AR-GLTrFASP-FZpipHILIC_35mAbs_E1_step.raw_20240829_noglyc_spec_cut	112.22	7.54e-01 - 9.23e-01	130000000	2	39.82	4	9	477	500	9.41e-01 - 9.84e-01	61.9 - 93.9	61.9 - 93.9	1079.2589; 1079.2590	1079.26	-3.34; -3.24	0	4313.02	24	9.89e+06	39.82	24-13010	HexNAc(6)Hex(4)
31.3.1	142103	39.8500	13046	sp|Q96PD5|PGRP2_HUMAN N-acetylmuramoyl-L-alanine amidase OS=Homo sapiens OX=9606 GN=PGLYRP2 PE=1 SV=1	Q96PD5	N	485	485	R.GFGVAIVGnYTAALPTEAALRTVR.D	HexNAc(6)Hex(4)	Uncertain			AR	d	4313.0068	NGlycan/1866.6875	0	d_hIgA-AR-GLTrFASP-FZpipHILIC_35mAbs_E1_step.raw_20240829_noglyc_spec_cut	112.22	0.75	130000000	2	39.82	4	9	477	500	0.94	93.9	93.9	1079.2590	1079.26	-3.24	0	4313.02	24	9.89e+06	39.82	24-13046	HexNAc(6)Hex(4)
32	36332; 74960	40.1300; 40.1500	14873; 13844	sp|Q96PD5|PGRP2_HUMAN N-acetylmuramoyl-L-alanine amidase OS=Homo sapiens OX=9606 GN=PGLYRP2 PE=1 SV=1	Q96PD5	N	485	485	R.GFGVAIVGnYTAALPTEAALRTVR.D	HexNAc(6)Hex(5)	Uncertain			SA	c	4475.0644; 4475.0603	NGlycan/2028.7404	2	c_hIgA-SA-GLTrFASP-FZpipHILIC_E1_step.raw_20240829_noglyc_spec_cut; a_hIgA-SA-GLTrFASP-FZpipHILIC_E1_step.raw_20240829_noglyc_spec_cut	135.95	1.00e+00 - 1.00e+00		2	40.16 - 40.23	3	9	477	500	1.00e+00 - 1.00e+00	5.1 - 9.8	5.1 - 9.8	1492.6954; 1492.6940	1492.7	-2.05; -2.98	0	4475.07	6; 12	3.025e+06 - 3.234e+06	40.16 - 40.23	6; 12-14873	HexNAc(6)Hex(5)
32.1	74960	40.1500	13844	sp|Q96PD5|PGRP2_HUMAN N-acetylmuramoyl-L-alanine amidase OS=Homo sapiens OX=9606 GN=PGLYRP2 PE=1 SV=1	Q96PD5	N	485	485	R.GFGVAIVGnYTAALPTEAALRTVR.D	HexNAc(6)Hex(5)	Uncertain			SA	a	4475.0603	NGlycan/2028.7404	1	a_hIgA-SA-GLTrFASP-FZpipHILIC_E1_step.raw_20240829_noglyc_spec_cut	135.95	1	32400000	2	40.16	3	9	477	500	1	9.8	9.8	1492.6940	1492.7	-2.98	0	4475.07	12	3.02e+06	40.16	12-13844	HexNAc(6)Hex(5)
33	55892; 74957	40.1500; 40.1100	14909; 13827	sp|Q96PD5|PGRP2_HUMAN N-acetylmuramoyl-L-alanine amidase OS=Homo sapiens OX=9606 GN=PGLYRP2 PE=1 SV=1	Q96PD5	N	485	485	R.GFGVAIVGnYTAALPTEAALRTVR.D	HexNAc(6)Hex(5)	Uncertain			SA	d	4475.0587; 4475.0574	NGlycan/2028.7404	2	d_hIgA-SA-GLTrFASP-FZpipHILIC_E1_step.raw_20240829_noglyc_spec_cut; a_hIgA-SA-GLTrFASP-FZpipHILIC_E1_step.raw_20240829_noglyc_spec_cut	118.81	9.99e-01 - 1.00e+00		2	40.13 - 40.28	4	9	477	500	9.99e-01 - 1.00e+00	24.3 - 91.6	24.3 - 91.6	1119.7720; 1119.7716	1119.78	-3.33; -3.62	0	4475.07	9; 12	7.578e+06 - 9.622e+06	40.13 - 40.28	9; 12-14909	HexNAc(6)Hex(5)
33.1	55892	40.1500	14909	sp|Q96PD5|PGRP2_HUMAN N-acetylmuramoyl-L-alanine amidase OS=Homo sapiens OX=9606 GN=PGLYRP2 PE=1 SV=1	Q96PD5	N	485	485	R.GFGVAIVGnYTAALPTEAALRTVR.D	HexNAc(6)Hex(5)	Uncertain			SA	d	4475.0587	NGlycan/2028.7404	1	d_hIgA-SA-GLTrFASP-FZpipHILIC_E1_step.raw_20240829_noglyc_spec_cut	118.81	1	103000000	2	40.28	4	9	477	500	1	91.6	91.6	1119.7720	1119.78	-3.33	0	4475.07	9	7.58e+06	40.28	9-14909	HexNAc(6)Hex(5)
34	86112; 102337; 130690	41.8000; 41.6700; 41.8900	13148; 13975; 13446	sp|P06331|HV434_HUMAN Immunoglobulin heavy variable 4-34 OS=Homo sapiens OX=9606 GN=IGHV4-34 PE=1 SV=2	P06331	N	78	78	K.GLEWIGEInHSGSTNYNPSLK.S	HexNAc(4)Hex(5)Fuc(2)NeuAc(2)	Uncertain			AR	a	4811.9852; 4811.9855; 4811.9846	NGlycan/2496.8883	2	a_hIgA-AR-GLTrFASP-FZpipHILIC_8mAbs_E2_step.raw_20240829_noglyc_spec_cut; b_hIgA-AR-GLTrFASP-FZpipHILIC_11mAbs_E2_step.raw_20240829_noglyc_spec_cut; c_hIgA-AR-GLTrFASP-FZpipHILIC_209mAbs-Dil1-5_D_step.raw_20240829_noglyc_spec_cut	127.09	2.08e-01 - 1.00e+00		2	41.55 - 41.88	4	9	70	90	2.08e-01 - 1.00e+00	5.4 - 122.7	5.4 - 122.7	1204.0036; 1204.0037; 1204.0034	1204.01	-4.42; -4.36; -4.55	-1	4812.01	14; 17; 22	1.457e+06 - 2.095e+06	41.55 - 41.88	14; 17; 22-13148	HexNAc(4)Hex(5)Fuc(2)NeuAc(2)
34.1	130690	41.8900	13446	sp|P06331|HV434_HUMAN Immunoglobulin heavy variable 4-34 OS=Homo sapiens OX=9606 GN=IGHV4-34 PE=1 SV=2	P06331	N	78	78	K.GLEWIGEInHSGSTNYNPSLK.S	HexNAc(4)Hex(5)Fuc(2)NeuAc(2)	Uncertain			AR	c	4811.9846	NGlycan/2496.8883	1	c_hIgA-AR-GLTrFASP-FZpipHILIC_209mAbs-Dil1-5_D_step.raw_20240829_noglyc_spec_cut	127.09	0.21	16200000	2	41.88	4	9	70	90	0.21	122.7	122.7	1204.0034	1204.01	-4.55	-1	4812.01	22	1.64e+06	41.88	22-13446	HexNAc(4)Hex(5)Fuc(2)NeuAc(2)
35	81844	41.9000	13472	sp|P06331|HV434_HUMAN Immunoglobulin heavy variable 4-34 OS=Homo sapiens OX=9606 GN=IGHV4-34 PE=1 SV=2	P06331	N,N	78,84	78	K.GLEWIGEInHSGSTnYNPSLK.S	HexNAc(4)Hex(5)Fuc(2)NeuAc(2)	Uncertain			AR	d	4812.9869	NGlycan/2496.8883; Deamidated/0.9840	1	d_hIgA-AR-GLTrFASP-FZpipHILIC_217mAbs-Dil1-5_D_step.raw_20240829_noglyc_spec_cut	305.38	0.041	1330000	0	41.82	4	9,15	70	90	0.041	208.2	12.0	1204.2540	1204.25	-0.74	-1	4812.99	13	3.67e+05	41.82	13-13472	HexNAc(4)Hex(5)Fuc(2)NeuAc(2)
36	85172; 85200; 85377; 85434; 101455; 101459; 101682; 134173; 134190; 134389; 134423; 134438; 134460; 141926; 141961	33.4400; 33.6500; 35.2200; 35.5700; 33.5300; 33.5600; 35.4500; 33.2200; 33.3200; 34.7700; 35.0200; 35.1700; 35.3200; 31.6400; 34.3200	10142; 10223; 10802; 10937; 11054; 11067; 11768; 10432; 10468; 11022; 11116; 11175; 11231; 9847; 10882	sp|P06331|HV434_HUMAN Immunoglobulin heavy variable 4-34 OS=Homo sapiens OX=9606 GN=IGHV4-34 PE=1 SV=2	P06331	W,N	73,78	78	K.GLEwIGEInHSGSTNYNPSLKSR.V	HexNAc(4)Hex(5)NeuAc(2)	Uncertain			AR	a	4795.0236; 4795.0214; 4795.0143; 4795.0120; 4795.0174; 4795.0155; 4795.0163; 4795.0225; 4795.0170; 4795.0237; 4795.0123; 4795.0128; 4795.0132; 4795.0337; 4795.0170	Dioxidation/31.9898; NGlycan/2204.7724	2	a_hIgA-AR-GLTrFASP-FZpipHILIC_8mAbs_E2_step.raw_20240829_noglyc_spec_cut; b_hIgA-AR-GLTrFASP-FZpipHILIC_11mAbs_E2_step.raw_20240829_noglyc_spec_cut; d_hIgA-AR-GLTrFASP-FZpipHILIC_16mAbs_E2_step.raw_20240829_noglyc_spec_cut; d_hIgA-AR-GLTrFASP-FZpipHILIC_35mAbs_E1_step.raw_20240829_noglyc_spec_cut	245.08	9.38e-01 - 1.00e+00		2	31.67 - 35.01	4	4,9	70	92	9.38e-01 - 1.00e+00	1.9 - 79.5	1.9 - 79.5	1199.7632; 1199.7626; 1199.7609; 1199.7603; 1199.7616; 1199.7612; 1199.7614; 1199.7629; 1199.7615; 1199.7632; 1199.7604; 1199.7605; 1199.7606; 1199.7657; 1199.7615	1199.76	2.07; 1.62; 0.14; -0.35; 0.79; 0.39; 0.56; 1.84; 0.70; 2.09; -0.27; -0.17; -0.09; 4.19; 0.71	-1 - 1	4795.01	14; 17; 23; 24	9.701e+06 - 3.771e+07	31.67 - 35.01	14; 17; 23; 24-10142	HexNAc(4)Hex(5)NeuAc(2)
36.1	85172; 85200; 85377; 85434	33.4400; 33.6500; 35.2200; 35.5700	10142; 10223; 10802; 10937	sp|P06331|HV434_HUMAN Immunoglobulin heavy variable 4-34 OS=Homo sapiens OX=9606 GN=IGHV4-34 PE=1 SV=2	P06331	W,N	73,78	78	K.GLEwIGEInHSGSTNYNPSLKSR.V	HexNAc(4)Hex(5)NeuAc(2)	Uncertain			AR	a	4795.0236; 4795.0214; 4795.0143; 4795.0120	Dioxidation/31.9898; NGlycan/2204.7724	1	a_hIgA-AR-GLTrFASP-FZpipHILIC_8mAbs_E2_step.raw_20240829_noglyc_spec_cut	236.75	9.96e-01 - 1.00e+00	244000000	2	35.01	4	4,9	70	92	9.96e-01 - 1.00e+00	5.5 - 61.3	5.0 - 10.7	1199.7632; 1199.7626; 1199.7609; 1199.7603	1199.76	2.07; 1.62; 0.14; -0.35	0 - 1	4795.01	14	1.39e+07	35.01	14-10142	HexNAc(4)Hex(5)NeuAc(2)
36.1.1	85200	33.6500	10223	sp|P06331|HV434_HUMAN Immunoglobulin heavy variable 4-34 OS=Homo sapiens OX=9606 GN=IGHV4-34 PE=1 SV=2	P06331	W,N	73,78	78	K.GLEwIGEInHSGSTNYNPSLKSR.V	HexNAc(4)Hex(5)NeuAc(2)	Uncertain			AR	a	4795.0214	Dioxidation/31.9898; NGlycan/2204.7724	0	a_hIgA-AR-GLTrFASP-FZpipHILIC_8mAbs_E2_step.raw_20240829_noglyc_spec_cut	205.1	1	244000000	2	35.01	4	4,9	70	92	1	17.6	5.0	1199.7626	1199.76	1.62	1	4795.01	14	1.39e+07	35.01	14-10223	HexNAc(4)Hex(5)NeuAc(2)
36.1.2	85377	35.2200	10802	sp|P06331|HV434_HUMAN Immunoglobulin heavy variable 4-34 OS=Homo sapiens OX=9606 GN=IGHV4-34 PE=1 SV=2	P06331	W,N	73,78	78	K.GLEwIGEInHSGSTNYNPSLKSR.V	HexNAc(4)Hex(5)NeuAc(2)	Uncertain			AR	a	4795.0143	Dioxidation/31.9898; NGlycan/2204.7724	0	a_hIgA-AR-GLTrFASP-FZpipHILIC_8mAbs_E2_step.raw_20240829_noglyc_spec_cut	236.75	1	244000000	2	35.01	4	4,9	70	92	1	17.2	10.7	1199.7609	1199.76	0.14	0	4795.01	14	1.39e+07	35.01	14-10802	HexNAc(4)Hex(5)NeuAc(2)
36.1.3	85434	35.5700	10937	sp|P06331|HV434_HUMAN Immunoglobulin heavy variable 4-34 OS=Homo sapiens OX=9606 GN=IGHV4-34 PE=1 SV=2	P06331	W,N	73,78	78	K.GLEwIGEInHSGSTNYNPSLKSR.V	HexNAc(4)Hex(5)NeuAc(2)	Uncertain			AR	a	4795.0120	Dioxidation/31.9898; NGlycan/2204.7724	0	a_hIgA-AR-GLTrFASP-FZpipHILIC_8mAbs_E2_step.raw_20240829_noglyc_spec_cut	112.98	1	244000000	2	35.01	4	4,9	70	92	1	5.5	5.5	1199.7603	1199.76	-0.35	0	4795.01	14	1.39e+07	35.01	14-10937	HexNAc(4)Hex(5)NeuAc(2)
36.2	101455; 101459; 101682	33.5300; 33.5600; 35.4500	11054; 11067; 11768	sp|P06331|HV434_HUMAN Immunoglobulin heavy variable 4-34 OS=Homo sapiens OX=9606 GN=IGHV4-34 PE=1 SV=2	P06331	W,N	73,78	78	K.GLEwIGEInHSGSTNYNPSLKSR.V	HexNAc(4)Hex(5)NeuAc(2)	Uncertain			AR	b	4795.0174; 4795.0155; 4795.0163	Dioxidation/31.9898; NGlycan/2204.7724	1	b_hIgA-AR-GLTrFASP-FZpipHILIC_11mAbs_E2_step.raw_20240829_noglyc_spec_cut	175.27	9.99e-01 - 1.00e+00	177000000	2	34.96	4	4,9	70	92	9.99e-01 - 1.00e+00	10.4 - 28.0	10.4 - 14.4	1199.7616; 1199.7612; 1199.7614	1199.76	0.79; 0.39; 0.56	-1 - 1	4795.01	17	1.24e+07	34.96	17-11054	HexNAc(4)Hex(5)NeuAc(2)
36.2.2	101459	33.5600	11067	sp|P06331|HV434_HUMAN Immunoglobulin heavy variable 4-34 OS=Homo sapiens OX=9606 GN=IGHV4-34 PE=1 SV=2	P06331	W,N	73,78	78	K.GLEwIGEInHSGSTNYNPSLKSR.V	HexNAc(4)Hex(5)NeuAc(2)	Uncertain			AR	b	4795.0155	Dioxidation/31.9898; NGlycan/2204.7724	0	b_hIgA-AR-GLTrFASP-FZpipHILIC_11mAbs_E2_step.raw_20240829_noglyc_spec_cut	168.24	1	177000000	2	34.96	4	4,9	70	92	1	12.4	12.4	1199.7612	1199.76	0.39	1	4795.01	17	1.24e+07	34.96	17-11067	HexNAc(4)Hex(5)NeuAc(2)
36.2.3	101682	35.4500	11768	sp|P06331|HV434_HUMAN Immunoglobulin heavy variable 4-34 OS=Homo sapiens OX=9606 GN=IGHV4-34 PE=1 SV=2	P06331	W,N	73,78	78	K.GLEwIGEInHSGSTNYNPSLKSR.V	HexNAc(4)Hex(5)NeuAc(2)	Uncertain			AR	b	4795.0163	Dioxidation/31.9898; NGlycan/2204.7724	0	b_hIgA-AR-GLTrFASP-FZpipHILIC_11mAbs_E2_step.raw_20240829_noglyc_spec_cut	107.95	1	177000000	2	34.96	4	4,9	70	92	1	10.4	10.4	1199.7614	1199.76	0.56	-1	4795.01	17	1.24e+07	34.96	17-11768	HexNAc(4)Hex(5)NeuAc(2)
36.3	134173; 134190; 134389; 134423; 134438; 134460	33.2200; 33.3200; 34.7700; 35.0200; 35.1700; 35.3200	10432; 10468; 11022; 11116; 11175; 11231	sp|P06331|HV434_HUMAN Immunoglobulin heavy variable 4-34 OS=Homo sapiens OX=9606 GN=IGHV4-34 PE=1 SV=2	P06331	W,N	73,78	78	K.GLEwIGEInHSGSTNYNPSLKSR.V	HexNAc(4)Hex(5)NeuAc(2)	Uncertain			AR	d	4795.0225; 4795.0170; 4795.0237; 4795.0123; 4795.0128; 4795.0132	Dioxidation/31.9898; NGlycan/2204.7724	1	d_hIgA-AR-GLTrFASP-FZpipHILIC_16mAbs_E2_step.raw_20240829_noglyc_spec_cut	245.08	9.38e-01 - 1.00e+00	163000000	2	34.69	4	4,9	70	92	9.38e-01 - 1.00e+00	1.9 - 79.5	1.9 - 79.5	1199.7629; 1199.7615; 1199.7632; 1199.7604; 1199.7605; 1199.7606	1199.76	1.84; 0.70; 2.09; -0.27; -0.17; -0.09	-1 - 1	4795.01	23	9.7e+06	34.69	23-10432	HexNAc(4)Hex(5)NeuAc(2)
36.3.2	134190	33.3200	10468	sp|P06331|HV434_HUMAN Immunoglobulin heavy variable 4-34 OS=Homo sapiens OX=9606 GN=IGHV4-34 PE=1 SV=2	P06331	W,N	73,78	78	K.GLEwIGEInHSGSTNYNPSLKSR.V	HexNAc(4)Hex(5)NeuAc(2)	Uncertain			AR	d	4795.0170	Dioxidation/31.9898; NGlycan/2204.7724	0	d_hIgA-AR-GLTrFASP-FZpipHILIC_16mAbs_E2_step.raw_20240829_noglyc_spec_cut	245.08	0.94	163000000	2	34.69	4	4,9	70	92	0.94	3.7	3.7	1199.7615	1199.76	0.70	1	4795.01	23	9.7e+06	34.69	23-10468	HexNAc(4)Hex(5)NeuAc(2)
36.3.3	134389	34.7700	11022	sp|P06331|HV434_HUMAN Immunoglobulin heavy variable 4-34 OS=Homo sapiens OX=9606 GN=IGHV4-34 PE=1 SV=2	P06331	W,N	73,78	78	K.GLEwIGEInHSGSTNYNPSLKSR.V	HexNAc(4)Hex(5)NeuAc(2)	Uncertain			AR	d	4795.0237	Dioxidation/31.9898; NGlycan/2204.7724	0	d_hIgA-AR-GLTrFASP-FZpipHILIC_16mAbs_E2_step.raw_20240829_noglyc_spec_cut	233.33	1	163000000	2	34.69	4	4,9	70	92	1	1.9	1.9	1199.7632	1199.76	2.09	0	4795.01	23	9.7e+06	34.69	23-11022	HexNAc(4)Hex(5)NeuAc(2)
36.3.4	134423	35.0200	11116	sp|P06331|HV434_HUMAN Immunoglobulin heavy variable 4-34 OS=Homo sapiens OX=9606 GN=IGHV4-34 PE=1 SV=2	P06331	W,N	73,78	78	K.GLEwIGEInHSGSTNYNPSLKSR.V	HexNAc(4)Hex(5)NeuAc(2)	Uncertain			AR	d	4795.0123	Dioxidation/31.9898; NGlycan/2204.7724	0	d_hIgA-AR-GLTrFASP-FZpipHILIC_16mAbs_E2_step.raw_20240829_noglyc_spec_cut	211.25	1	163000000	2	34.69	4	4,9	70	92	1	79.5	79.5	1199.7604	1199.76	-0.27	-1	4795.01	23	9.7e+06	34.69	23-11116	HexNAc(4)Hex(5)NeuAc(2)
36.3.5	134438	35.1700	11175	sp|P06331|HV434_HUMAN Immunoglobulin heavy variable 4-34 OS=Homo sapiens OX=9606 GN=IGHV4-34 PE=1 SV=2	P06331	W,N	73,78	78	K.GLEwIGEInHSGSTNYNPSLKSR.V	HexNAc(4)Hex(5)NeuAc(2)	Uncertain			AR	d	4795.0128	Dioxidation/31.9898; NGlycan/2204.7724	0	d_hIgA-AR-GLTrFASP-FZpipHILIC_16mAbs_E2_step.raw_20240829_noglyc_spec_cut	145.59	1	163000000	2	34.69	4	4,9	70	92	1	27.1	16.0	1199.7605	1199.76	-0.17	0	4795.01	23	9.7e+06	34.69	23-11175	HexNAc(4)Hex(5)NeuAc(2)
36.4	141926; 141961	31.6400; 34.3200	9847; 10882	sp|P06331|HV434_HUMAN Immunoglobulin heavy variable 4-34 OS=Homo sapiens OX=9606 GN=IGHV4-34 PE=1 SV=2	P06331	W,N	73,78	78	K.GLEwIGEInHSGSTNYNPSLKSR.V	HexNAc(4)Hex(5)NeuAc(2)	Uncertain			AR	d	4795.0337; 4795.0170	Dioxidation/31.9898; NGlycan/2204.7724	1	d_hIgA-AR-GLTrFASP-FZpipHILIC_35mAbs_E1_step.raw_20240829_noglyc_spec_cut	233.31	9.44e-01 - 9.50e-01	364000000	2	31.67	4	4,9	70	92	9.44e-01 - 9.50e-01	10.8 - 20.0	10.8 - 17.2	1199.7657; 1199.7615	1199.76	4.19; 0.71	0	4795.01	24	3.77e+07	31.67	24-9847	HexNAc(4)Hex(5)NeuAc(2)
36.4.2	141961	34.3200	10882	sp|P06331|HV434_HUMAN Immunoglobulin heavy variable 4-34 OS=Homo sapiens OX=9606 GN=IGHV4-34 PE=1 SV=2	P06331	W,N	73,78	78	K.GLEwIGEInHSGSTNYNPSLKSR.V	HexNAc(4)Hex(5)NeuAc(2)	Uncertain			AR	d	4795.0170	Dioxidation/31.9898; NGlycan/2204.7724	0	d_hIgA-AR-GLTrFASP-FZpipHILIC_35mAbs_E1_step.raw_20240829_noglyc_spec_cut	192.61	0.94	364000000	2	31.67	4	4,9	70	92	0.94	20.0	17.2	1199.7615	1199.76	0.71	0	4795.01	24	3.77e+07	31.67	24-10882	HexNAc(4)Hex(5)NeuAc(2)
37	115007	31.6900	9480	sp|P06331|HV434_HUMAN Immunoglobulin heavy variable 4-34 OS=Homo sapiens OX=9606 GN=IGHV4-34 PE=1 SV=2	P06331	W,N	73,78	78	K.GLEwIGEInHSGSTNYNPSLKSR.V	HexNAc(4)Hex(5)NeuAc(2)	True-positive	Low b and y ions,Replace N-glycan	HexNAc(4)Hex(5)NeuAc(2)	AR	b	4796.0396	Dioxidation/31.9898; NGlycan/2205.7928	1	b_hIgA-AR-GLTrFASP-FZpipHILIC_214mAbs-Dil1-5_D_step.raw_20240829_noglyc_spec_cut	211.66	0.79	31100000	2	31.65	4	4,9	70	92	0.79	6.7	3.1	1200.0172	1200.02	1.16	-1	4796.03	19	3.21e+06	31.65	19-9480	HexNAc(4)Hex(5)Fuc(2)NeuAc(1)
38	85334; 101597; 101607	34.9600; 34.8600; 34.9200	10709; 11550; 11572	sp|P06331|HV434_HUMAN Immunoglobulin heavy variable 4-34 OS=Homo sapiens OX=9606 GN=IGHV4-34 PE=1 SV=2	P06331	W,N	73,78	78	K.GLEwIGEInHSGSTNYNPSLKSR.V	HexNAc(5)Hex(6)NeuAc(1)	Uncertain			AR	a	4869.0309; 4869.0393; 4869.0416	Dioxidation/31.9898; NGlycan/2278.8092	2	a_hIgA-AR-GLTrFASP-FZpipHILIC_8mAbs_E2_step.raw_20240829_noglyc_spec_cut; b_hIgA-AR-GLTrFASP-FZpipHILIC_11mAbs_E2_step.raw_20240829_noglyc_spec_cut	130.86	1.00e+00 - 1.00e+00		2	34.90 - 34.95	4	4,9	70	92	1.00e+00 - 1.00e+00	0.2 - 30.2	0.2 - 30.2	1218.2650; 1218.2671; 1218.2677	1218.27	-4.00; -2.29; -1.80	1	4869.05	14; 17	9.141e+05 - 1.019e+06	34.90 - 34.95	14; 17-10709	HexNAc(5)Hex(6)NeuAc(1)
38.1	101597; 101607	34.8600; 34.9200	11550; 11572	sp|P06331|HV434_HUMAN Immunoglobulin heavy variable 4-34 OS=Homo sapiens OX=9606 GN=IGHV4-34 PE=1 SV=2	P06331	W,N	73,78	78	K.GLEwIGEInHSGSTNYNPSLKSR.V	HexNAc(5)Hex(6)NeuAc(1)	Uncertain			AR	b	4869.0393; 4869.0416	Dioxidation/31.9898; NGlycan/2278.8092	1	b_hIgA-AR-GLTrFASP-FZpipHILIC_11mAbs_E2_step.raw_20240829_noglyc_spec_cut	130.86	1	7830000	2	34.90	4	4,9	70	92	1	0.2 - 30.2	0.2 - 30.2	1218.2671; 1218.2677	1218.27	-2.29; -1.80	1	4869.05	17	1.02e+06	34.90	17-11550	HexNAc(5)Hex(6)NeuAc(1)
38.1.2	101607	34.9200	11572	sp|P06331|HV434_HUMAN Immunoglobulin heavy variable 4-34 OS=Homo sapiens OX=9606 GN=IGHV4-34 PE=1 SV=2	P06331	W,N	73,78	78	K.GLEwIGEInHSGSTNYNPSLKSR.V	HexNAc(5)Hex(6)NeuAc(1)	Uncertain			AR	b	4869.0416	Dioxidation/31.9898; NGlycan/2278.8092	0	b_hIgA-AR-GLTrFASP-FZpipHILIC_11mAbs_E2_step.raw_20240829_noglyc_spec_cut	126.64	1	7830000	2	34.90	4	4,9	70	92	1	0.2	0.2	1218.2677	1218.27	-1.80	1	4869.05	17	1.02e+06	34.90	17-11572	HexNAc(5)Hex(6)NeuAc(1)
39	134024	32.0600	9985	sp|P06331|HV434_HUMAN Immunoglobulin heavy variable 4-34 OS=Homo sapiens OX=9606 GN=IGHV4-34 PE=1 SV=2	P06331	W,N	73,78	78	K.GLEwIGEInHSGSTNYNPSLKSR.V	HexNAc(5)Hex(6)Fuc(1)NeuAc(2)	True-positive		HexNAc(5)Hex(6)Fuc(1)NeuAc(2)	AR	d	5307.2334	Dioxidation/31.9898; NGlycan/2716.9829	1	d_hIgA-AR-GLTrFASP-FZpipHILIC_16mAbs_E2_step.raw_20240829_noglyc_spec_cut	206.81	0.98	16500000	3	32.02	4	4,9	70	92	0.98	37.9	19.2	1327.8156	1327.81	1.75	-1	5307.22	23	1.39e+06	32.02	23-9985	HexNAc(5)Hex(6)Fuc(3)NeuAc(1)
40	88940; 121050	33.8800; 33.7900	10309; 11255	sp|P06331|HV434_HUMAN Immunoglobulin heavy variable 4-34 OS=Homo sapiens OX=9606 GN=IGHV4-34 PE=1 SV=2	P06331	W,N	73,78	78	K.GLEwIGEInHSGSTNYNPSLKSR.V	HexNAc(5)Hex(6)HexA(1)NeuAc(2)	Uncertain			AR	a	5336.2030; 5336.2038	Dioxidation/31.9898; NGlycan/2745.9367	2	a_hIgA-AR-GLTrFASP-FZpipHILIC_8mAbs_E2_step.raw_20240829_noglyc_spec_cut; c_hIgA-AR-GLTrFASP-FZpipHILIC_16mAbs_E2_step.raw_20240829_noglyc_spec_cut	215.37	8.59e-01 - 1.21e+00		3	33.65 - 33.81	4	4,9	70	92	8.59e-01 - 1.21e+00	9.7 - 30.0	9.7 - 30.0	1335.0580; 1335.0582	1335.05	4.69; 4.85	-1 - 0	5336.18	14; 20	3.624e+05 - 1.058e+06	33.65 - 33.81	14; 20-10309	HexNAc(5)Hex(6)HexA(1)NeuAc(2)
40.1	88940	33.8800	10309	sp|P06331|HV434_HUMAN Immunoglobulin heavy variable 4-34 OS=Homo sapiens OX=9606 GN=IGHV4-34 PE=1 SV=2	P06331	W,N	73,78	78	K.GLEwIGEInHSGSTNYNPSLKSR.V	HexNAc(5)Hex(6)HexA(1)NeuAc(2)	Uncertain			AR	a	5336.2030	Dioxidation/31.9898; NGlycan/2745.9367	1	a_hIgA-AR-GLTrFASP-FZpipHILIC_8mAbs_E2_step.raw_20240829_noglyc_spec_cut	215.37	0.86	14500000	3	33.81	4	4,9	70	92	0.86	9.7	9.7	1335.0580	1335.05	4.69	-1	5336.18	14	1.06e+06	33.81	14-10309	HexNAc(5)Hex(6)HexA(1)NeuAc(2)
41	85509; 85671; 101670	36.1400; 37.6300; 35.3700	11141; 11688; 11740	sp|P06331|HV434_HUMAN Immunoglobulin heavy variable 4-34 OS=Homo sapiens OX=9606 GN=IGHV4-34 PE=1 SV=2	P06331	W,N	73,78	78	K.GLEwIGEInHSGSTNYNPSLKSR.V	HexNAc(5)Hex(6)Fuc(1)NeuAc(3)	Uncertain			AR	a	5597.3118; 5597.3008; 5597.3214	Dioxidation/31.9898; NGlycan/3007.0580	2	a_hIgA-AR-GLTrFASP-FZpipHILIC_8mAbs_E2_step.raw_20240829_noglyc_spec_cut; b_hIgA-AR-GLTrFASP-FZpipHILIC_11mAbs_E2_step.raw_20240829_noglyc_spec_cut	225.4	9.99e-01 - 1.00e+00		3	35.38 - 37.65	4	4,9	70	92	9.99e-01 - 1.00e+00	11.6 - 61.6	6.3 - 26.0	1400.3352; 1400.3325; 1400.3376	1400.33	2.26; 0.30; 3.97	-1 - 0	5597.3	14; 17	6.025e+05 - 3.495e+06	35.38 - 37.65	14; 17-11141	HexNAc(5)Hex(6)Fuc(1)NeuAc(3)
41.1	85509; 85671	36.1400; 37.6300	11141; 11688	sp|P06331|HV434_HUMAN Immunoglobulin heavy variable 4-34 OS=Homo sapiens OX=9606 GN=IGHV4-34 PE=1 SV=2	P06331	W,N	73,78	78	K.GLEwIGEInHSGSTNYNPSLKSR.V	HexNAc(5)Hex(6)Fuc(1)NeuAc(3)	Uncertain			AR	a	5597.3118; 5597.3008	Dioxidation/31.9898; NGlycan/3007.0580	1	a_hIgA-AR-GLTrFASP-FZpipHILIC_8mAbs_E2_step.raw_20240829_noglyc_spec_cut	225.4	9.99e-01 - 9.99e-01	50400000	3	37.65	4	4,9	70	92	9.99e-01 - 9.99e-01	11.6 - 61.6	6.3 - 10.4	1400.3352; 1400.3325	1400.33	2.26; 0.30	0	5597.3	14	3.5e+06	37.65	14-11141	HexNAc(5)Hex(6)Fuc(1)NeuAc(3)
41.1.2	85671	37.6300	11688	sp|P06331|HV434_HUMAN Immunoglobulin heavy variable 4-34 OS=Homo sapiens OX=9606 GN=IGHV4-34 PE=1 SV=2	P06331	W,N	73,78	78	K.GLEwIGEInHSGSTNYNPSLKSR.V	HexNAc(5)Hex(6)Fuc(1)NeuAc(3)	Uncertain			AR	a	5597.3008	Dioxidation/31.9898; NGlycan/3007.0580	0	a_hIgA-AR-GLTrFASP-FZpipHILIC_8mAbs_E2_step.raw_20240829_noglyc_spec_cut	225.4	1	50400000	3	37.65	4	4,9	70	92	1	11.6	10.4	1400.3325	1400.33	0.30	0	5597.3	14	3.5e+06	37.65	14-11688	HexNAc(5)Hex(6)Fuc(1)NeuAc(3)
41.2	101670	35.3700	11740	sp|P06331|HV434_HUMAN Immunoglobulin heavy variable 4-34 OS=Homo sapiens OX=9606 GN=IGHV4-34 PE=1 SV=2	P06331	W,N	73,78	78	K.GLEwIGEInHSGSTNYNPSLKSR.V	HexNAc(5)Hex(6)Fuc(1)NeuAc(3)	Uncertain			AR	b	5597.3214	Dioxidation/31.9898; NGlycan/3007.0580	1	b_hIgA-AR-GLTrFASP-FZpipHILIC_11mAbs_E2_step.raw_20240829_noglyc_spec_cut	223.9	1	2870000	3	35.38	4	4,9	70	92	1	26.0	26.0	1400.3376	1400.33	3.97	-1	5597.3	17	6.03e+05	35.38	17-11740	HexNAc(5)Hex(6)Fuc(1)NeuAc(3)
42	142135	40.2800	13214	sp|P06331|HV434_HUMAN Immunoglobulin heavy variable 4-34 OS=Homo sapiens OX=9606 GN=IGHV4-34 PE=1 SV=2	P06331	N	78	78	K.GLEWIGEInHSGSTNYNPSLKSRVTISVDTSK.N	HexNAc(3)Hex(4)	Uncertain			AR	d	4746.2239	NGlycan/1257.4494	1	d_hIgA-AR-GLTrFASP-FZpipHILIC_35mAbs_E1_step.raw_20240829_noglyc_spec_cut	260.77	0.94	63500000	2	40.30	4	9	70	101	0.94	124.7	124.7	1187.5632	1187.56	4.40	1	4746.2	24	6.78e+06	40.30	24-13214	HexNAc(3)Hex(4)
43	4213; 43628; 44009	45.2300; 39.7200; 45.3100	14657; 13216; 15219	sp|A0A0C4DH35|HV335_HUMAN Probable non-functional immunoglobulin heavy variable 3-35 OS=Homo sapiens OX=9606 GN=IGHV3-35 PE=1 SV=1	A0A0C4DH35	N	73	73	K.GLEWVSGVSWnGSR.T	HexNAc(5)Hex(5)Fuc(1)NeuAc(2)	Uncertain			SA	a	4086.6527; 4086.6458; 4086.6510	NGlycan/2553.9097	2	a_hIgA-SA-GLTrFASP-FZpipHILIC_E2_step.raw_20240829_noglyc_spec_cut; c_hIgA-SA-GLTrFASP-FZpipHILIC_E2_step.raw_20240829_noglyc_spec_cut	100.37	2.21e-01 - 8.37e-01		2	44.11 - 45.24	3	11	63	76	2.21e-01 - 8.37e-01	2.4 - 89.6	2.4 - 89.6	1363.2249; 1363.2226; 1363.2243	1363.22	1.43; -0.27; 1.01	0 - 1	4086.65	1; 7	1.854e+05 - 3.784e+05	44.11 - 45.24	1; 7-14657	HexNAc(5)Hex(5)Fuc(1)NeuAc(2)
43.1	43628; 44009	39.7200; 45.3100	13216; 15219	sp|A0A0C4DH35|HV335_HUMAN Probable non-functional immunoglobulin heavy variable 3-35 OS=Homo sapiens OX=9606 GN=IGHV3-35 PE=1 SV=1	A0A0C4DH35	N	73	73	K.GLEWVSGVSWnGSR.T	HexNAc(5)Hex(5)Fuc(1)NeuAc(2)	Uncertain			SA	c	4086.6458; 4086.6510	NGlycan/2553.9097	1	c_hIgA-SA-GLTrFASP-FZpipHILIC_E2_step.raw_20240829_noglyc_spec_cut	100.37	6.02e-01 - 8.37e-01	10700000	2	44.11	3	11	63	76	6.02e-01 - 8.37e-01	2.4 - 89.6	2.4 - 89.6	1363.2226; 1363.2243	1363.22	-0.27; 1.01	1	4086.65	7	3.78e+05	44.11	7-13216	HexNAc(5)Hex(5)Fuc(1)NeuAc(2)
44	16392; 16439; 16498; 16624; 74863	37.1100; 38.9600; 40.2800; 41.6300; 36.8200	13502; 14234; 14754; 15284; 12531	sp|A0A0C4DH35|HV335_HUMAN Probable non-functional immunoglobulin heavy variable 3-35 OS=Homo sapiens OX=9606 GN=IGHV3-35 PE=1 SV=1	A0A0C4DH35	W,N	72,73	73	K.GLEWVSGVSwnGSRTHYADSVK.G	HexNAc(5)Hex(3)Fuc(2)NeuAc(1)	Uncertain			SA	b	4534.9139; 4534.9054; 4534.9073; 4534.9078; 4534.9119	Oxidation/15.9949; NGlycan/2084.7666	2	b_hIgA-SA-GLTrFASP-FZpipHILIC_E1_step.raw_20240829_noglyc_spec_cut; a_hIgA-SA-GLTrFASP-FZpipHILIC_E1_step.raw_20240829_noglyc_spec_cut	160.85	1.00e+00 - 1.00e+00		2	36.57 - 36.99	4	10,11	63	84	1.00e+00 - 1.00e+00	3.5 - 29.7	0.0 - 22.5	1134.7358; 1134.7336; 1134.7341; 1134.7342; 1134.7353	1134.74	-3.12; -4.99; -4.57; -4.46; -3.56	-1 - 1	4534.93	3; 12	1.632e+07 - 3.646e+07	36.57 - 36.99	3; 12-13502	HexNAc(5)Hex(3)Fuc(2)NeuAc(1)
44.1	16392; 16439; 16498; 16624	37.1100; 38.9600; 40.2800; 41.6300	13502; 14234; 14754; 15284	sp|A0A0C4DH35|HV335_HUMAN Probable non-functional immunoglobulin heavy variable 3-35 OS=Homo sapiens OX=9606 GN=IGHV3-35 PE=1 SV=1	A0A0C4DH35	W,N	72,73	73	K.GLEWVSGVSwnGSRTHYADSVK.G	HexNAc(5)Hex(3)Fuc(2)NeuAc(1)	Uncertain			SA	b	4534.9139; 4534.9054; 4534.9073; 4534.9078	Oxidation/15.9949; NGlycan/2084.7666	1	b_hIgA-SA-GLTrFASP-FZpipHILIC_E1_step.raw_20240829_noglyc_spec_cut	160.85	1.00e+00 - 1.00e+00	923000000	2	36.99	4	10,11	63	84	1.00e+00 - 1.00e+00	6.1 - 29.7	0.0 - 22.5	1134.7358; 1134.7336; 1134.7341; 1134.7342	1134.74	-3.12; -4.99; -4.57; -4.46	-1 - 1	4534.93	3	1.63e+07	36.99	3-13502	HexNAc(5)Hex(3)Fuc(2)NeuAc(1)
44.1.1	16439	38.9600	14234	sp|A0A0C4DH35|HV335_HUMAN Probable non-functional immunoglobulin heavy variable 3-35 OS=Homo sapiens OX=9606 GN=IGHV3-35 PE=1 SV=1	A0A0C4DH35	W,N	72,73	73	K.GLEWVSGVSwnGSRTHYADSVK.G	HexNAc(5)Hex(3)Fuc(2)NeuAc(1)	Uncertain			SA	b	4534.9054	Oxidation/15.9949; NGlycan/2084.7666	0	b_hIgA-SA-GLTrFASP-FZpipHILIC_E1_step.raw_20240829_noglyc_spec_cut	160.85	1	923000000	2	36.99	4	10,11	63	84	1	6.1	6.1	1134.7336	1134.74	-4.99	1	4534.93	3	1.63e+07	36.99	3-14234	HexNAc(5)Hex(3)Fuc(2)NeuAc(1)
44.1.2	16498	40.2800	14754	sp|A0A0C4DH35|HV335_HUMAN Probable non-functional immunoglobulin heavy variable 3-35 OS=Homo sapiens OX=9606 GN=IGHV3-35 PE=1 SV=1	A0A0C4DH35	W,N	72,73	73	K.GLEWVSGVSwnGSRTHYADSVK.G	HexNAc(5)Hex(3)Fuc(2)NeuAc(1)	Uncertain			SA	b	4534.9073	Oxidation/15.9949; NGlycan/2084.7666	0	b_hIgA-SA-GLTrFASP-FZpipHILIC_E1_step.raw_20240829_noglyc_spec_cut	129.85	1	923000000	2	36.99	4	10,11	63	84	1	22.5	22.5	1134.7341	1134.74	-4.57	-1	4534.93	3	1.63e+07	36.99	3-14754	HexNAc(5)Hex(3)Fuc(2)NeuAc(1)
44.1.3	16624	41.6300	15284	sp|A0A0C4DH35|HV335_HUMAN Probable non-functional immunoglobulin heavy variable 3-35 OS=Homo sapiens OX=9606 GN=IGHV3-35 PE=1 SV=1	A0A0C4DH35	W,N	72,73	73	K.GLEWVSGVSwnGSRTHYADSVK.G	HexNAc(5)Hex(3)Fuc(2)NeuAc(1)	Uncertain			SA	b	4534.9078	Oxidation/15.9949; NGlycan/2084.7666	0	b_hIgA-SA-GLTrFASP-FZpipHILIC_E1_step.raw_20240829_noglyc_spec_cut	114.34	1	923000000	2	36.99	4	10,11	63	84	1	9.7	9.7	1134.7342	1134.74	-4.46	-1	4534.93	3	1.63e+07	36.99	3-15284	HexNAc(5)Hex(3)Fuc(2)NeuAc(1)
45	55804; 55805; 74858; 130608	36.5700; 36.6100; 36.5600; 35.9600	13500; 13514; 12430; 11185	sp|A0A0C4DH35|HV335_HUMAN Probable non-functional immunoglobulin heavy variable 3-35 OS=Homo sapiens OX=9606 GN=IGHV3-35 PE=1 SV=1	A0A0C4DH35	W,N	72,73	73	K.GLEWVSGVSwnGSRTHYADSVK.G	HexNAc(6)Hex(4)NeuAc(1)Phospho(1)	Uncertain			SA	d	4687.9083; 4687.9099; 4687.9082; 4687.9036	Oxidation/15.9949; NGlycan/2237.7493	2	d_hIgA-SA-GLTrFASP-FZpipHILIC_E1_step.raw_20240829_noglyc_spec_cut; a_hIgA-SA-GLTrFASP-FZpipHILIC_E1_step.raw_20240829_noglyc_spec_cut; c_hIgA-AR-GLTrFASP-FZpipHILIC_209mAbs-Dil1-5_D_step.raw_20240829_noglyc_spec_cut	162.23	9.69e-01 - 9.97e-01		2	36.11 - 36.64	4	10,11	63	84	9.69e-01 - 9.97e-01	3.4 - 85.7	0.0 - 28.6	1172.9844; 1172.9847; 1172.9843; 1172.9832	1172.98	-0.52; -0.19; -0.56; -1.54	1	4687.91	9; 12; 22	4.753e+06 - 1.153e+07	36.11 - 36.64	9; 12; 22-13500	HexNAc(6)Hex(4)NeuAc(1)Phospho(1)
45.1	55804; 55805	36.5700; 36.6100	13500; 13514	sp|A0A0C4DH35|HV335_HUMAN Probable non-functional immunoglobulin heavy variable 3-35 OS=Homo sapiens OX=9606 GN=IGHV3-35 PE=1 SV=1	A0A0C4DH35	W,N	72,73	73	K.GLEWVSGVSwnGSRTHYADSVK.G	HexNAc(6)Hex(4)NeuAc(1)Phospho(1)	Uncertain			SA	d	4687.9083; 4687.9099	Oxidation/15.9949; NGlycan/2237.7493	1	d_hIgA-SA-GLTrFASP-FZpipHILIC_E1_step.raw_20240829_noglyc_spec_cut	162.23	9.69e-01 - 9.97e-01	37200000	2	36.64	4	10,11	63	84	9.69e-01 - 9.97e-01	3.4 - 85.7	0.0 - 28.6	1172.9844; 1172.9847	1172.98	-0.52; -0.19	1	4687.91	9	4.75e+06	36.64	9-13500	HexNAc(6)Hex(4)NeuAc(1)Phospho(1)
45.2	74858	36.5600	12430	sp|A0A0C4DH35|HV335_HUMAN Probable non-functional immunoglobulin heavy variable 3-35 OS=Homo sapiens OX=9606 GN=IGHV3-35 PE=1 SV=1	A0A0C4DH35	W,N	72,73	73	K.GLEWVSGVSwnGSRTHYADSVK.G	HexNAc(6)Hex(4)NeuAc(1)Phospho(1)	Uncertain			SA	a	4687.9082	Oxidation/15.9949; NGlycan/2237.7493	1	a_hIgA-SA-GLTrFASP-FZpipHILIC_E1_step.raw_20240829_noglyc_spec_cut	102.12	1	88400000	2	36.57	4	10,11	63	84	1	23.7	23.7	1172.9843	1172.98	-0.56	1	4687.91	12	1.15e+07	36.57	12-12430	HexNAc(6)Hex(4)NeuAc(1)Phospho(1)
46	16332; 16373; 16440; 16476; 36312; 55884; 142013	35.6900; 36.3300; 39.1000; 39.7100; 39.6400; 39.8500; 36.8700	12949; 13198; 14290; 14533; 14680; 14793; 11880	sp|A0A0C4DH35|HV335_HUMAN Probable non-functional immunoglobulin heavy variable 3-35 OS=Homo sapiens OX=9606 GN=IGHV3-35 PE=1 SV=1	A0A0C4DH35	W,N	72,73	73	K.GLEWVSGVSwnGSRTHYADSVK.G	HexNAc(5)Hex(4)NeuAc(2)	Uncertain			SA	b	4695.9644; 4695.9620; 4695.9470; 4695.9666; 4695.9701; 4695.9638; 4695.9619	Oxidation/15.9949; NGlycan/2245.7990	2	b_hIgA-SA-GLTrFASP-FZpipHILIC_E1_step.raw_20240829_noglyc_spec_cut; c_hIgA-SA-GLTrFASP-FZpipHILIC_E1_step.raw_20240829_noglyc_spec_cut; d_hIgA-SA-GLTrFASP-FZpipHILIC_E1_step.raw_20240829_noglyc_spec_cut; d_hIgA-AR-GLTrFASP-FZpipHILIC_35mAbs_E1_step.raw_20240829_noglyc_spec_cut	307.41	3.52e-02 - 9.98e-01		2	36.68 - 39.95	4	10,11	63	84	3.52e-02 - 9.98e-01	8.2 - 154.5	0.0 - 14.8	1174.9984; 1174.9978; 1174.9940; 1174.9989; 1174.9998; 1174.9982; 1174.9978	1175	0.83; 0.32; -2.88; 1.31; 2.05; 0.72; 0.30	0 - 1	4695.96	3; 6; 9; 24	1.446e+06 - 2.824e+08	36.68 - 39.95	3; 6; 9; 24-12949	HexNAc(5)Hex(4)NeuAc(2)
46.1	16332; 16373; 16440; 16476	35.6900; 36.3300; 39.1000; 39.7100	12949; 13198; 14290; 14533	sp|A0A0C4DH35|HV335_HUMAN Probable non-functional immunoglobulin heavy variable 3-35 OS=Homo sapiens OX=9606 GN=IGHV3-35 PE=1 SV=1	A0A0C4DH35	W,N	72,73	73	K.GLEWVSGVSwnGSRTHYADSVK.G	HexNAc(5)Hex(4)NeuAc(2)	Uncertain			SA	b	4695.9644; 4695.9620; 4695.9470; 4695.9666	Oxidation/15.9949; NGlycan/2245.7990	1	b_hIgA-SA-GLTrFASP-FZpipHILIC_E1_step.raw_20240829_noglyc_spec_cut	307.41	3.52e-02 - 9.98e-01	3710000000	2	37.36	4	10,11	63	84	3.52e-02 - 9.98e-01	8.2 - 154.5	0.0 - 14.8	1174.9984; 1174.9978; 1174.9940; 1174.9989	1175	0.83; 0.32; -2.88; 1.31	0 - 1	4695.96	3	2.82e+08	37.36	3-12949	HexNAc(5)Hex(4)NeuAc(2)
46.1.1	16440	39.1000	14290	sp|A0A0C4DH35|HV335_HUMAN Probable non-functional immunoglobulin heavy variable 3-35 OS=Homo sapiens OX=9606 GN=IGHV3-35 PE=1 SV=1	A0A0C4DH35	W,N	72,73	73	K.GLEWVSGVSwnGSRTHYADSVK.G	HexNAc(5)Hex(4)NeuAc(2)	Uncertain			SA	b	4695.9470	Oxidation/15.9949; NGlycan/2245.7990	0	b_hIgA-SA-GLTrFASP-FZpipHILIC_E1_step.raw_20240829_noglyc_spec_cut	195.07	1	3710000000	2	37.36	4	10,11	63	84	1	14.8	14.8	1174.9940	1175	-2.88	1	4695.96	3	2.82e+08	37.36	3-14290	HexNAc(5)Hex(4)NeuAc(2)
46.1.2	16476	39.7100	14533	sp|A0A0C4DH35|HV335_HUMAN Probable non-functional immunoglobulin heavy variable 3-35 OS=Homo sapiens OX=9606 GN=IGHV3-35 PE=1 SV=1	A0A0C4DH35	W,N	72,73	73	K.GLEWVSGVSwnGSRTHYADSVK.G	HexNAc(5)Hex(4)NeuAc(2)	Uncertain			SA	b	4695.9666	Oxidation/15.9949; NGlycan/2245.7990	0	b_hIgA-SA-GLTrFASP-FZpipHILIC_E1_step.raw_20240829_noglyc_spec_cut	307.41	0.035	3710000000	2	37.36	4	10,11	63	84	0.035	154.5	2.2	1174.9989	1175	1.31	1	4695.96	3	2.82e+08	37.36	3-14533	HexNAc(5)Hex(4)NeuAc(2)
46.2	36312	39.6400	14680	sp|A0A0C4DH35|HV335_HUMAN Probable non-functional immunoglobulin heavy variable 3-35 OS=Homo sapiens OX=9606 GN=IGHV3-35 PE=1 SV=1	A0A0C4DH35	W,N	72,73	73	K.GLEWVSGVSwnGSRTHYADSVK.G	HexNAc(5)Hex(4)NeuAc(2)	Uncertain			SA	c	4695.9701	Oxidation/15.9949; NGlycan/2245.7990	1	c_hIgA-SA-GLTrFASP-FZpipHILIC_E1_step.raw_20240829_noglyc_spec_cut	210.42	0.61	15200000	2	39.69	4	10,11	63	84	0.61	133.0	4.3	1174.9998	1175	2.05	0	4695.96	6	3.26e+06	39.69	6-14680	HexNAc(5)Hex(4)NeuAc(2)
46.3	55884	39.8500	14793	sp|A0A0C4DH35|HV335_HUMAN Probable non-functional immunoglobulin heavy variable 3-35 OS=Homo sapiens OX=9606 GN=IGHV3-35 PE=1 SV=1	A0A0C4DH35	W,N	72,73	73	K.GLEWVSGVSwnGSRTHYADSVK.G	HexNAc(5)Hex(4)NeuAc(2)	Uncertain			SA	d	4695.9638	Oxidation/15.9949; NGlycan/2245.7990	1	d_hIgA-SA-GLTrFASP-FZpipHILIC_E1_step.raw_20240829_noglyc_spec_cut	174.53	0.91	18700000	2	39.95	4	10,11	63	84	0.91	64.8	0.9	1174.9982	1175	0.72	1	4695.96	9	1.45e+06	39.95	9-14793	HexNAc(5)Hex(4)NeuAc(2)
47	75200; 81856; 105905; 130699; 130700; 142246	42.9700; 42.2500; 41.8500; 42.2100; 42.3400; 41.8000	14945; 13598; 13647; 13562; 13608; 13802	sp|A0A0C4DH35|HV335_HUMAN Probable non-functional immunoglobulin heavy variable 3-35 OS=Homo sapiens OX=9606 GN=IGHV3-35 PE=1 SV=1	A0A0C4DH35	N	73	73	K.GLEWVSGVSWnGSRTHYADSVK.G	HexNAc(3)Hex(7)NeuAc(1)Phospho(1)	Uncertain			SA	a	4548.8486; 4548.8448; 4548.8499; 4548.8452; 4548.8403; 4548.8407	NGlycan/2114.6696	2	a_hIgA-SA-GLTrFASP-FZpipHILIC_E1_step.raw_20240829_noglyc_spec_cut; d_hIgA-AR-GLTrFASP-FZpipHILIC_217mAbs-Dil1-5_D_step.raw_20240829_noglyc_spec_cut; b_hIgA-AR-GLTrFASP-FZpipHILIC_47mAbs_E1_step.raw_20240829_noglyc_spec_cut; c_hIgA-AR-GLTrFASP-FZpipHILIC_209mAbs-Dil1-5_D_step.raw_20240829_noglyc_spec_cut; d_hIgA-AR-GLTrFASP-FZpipHILIC_35mAbs_E1_step.raw_20240829_noglyc_spec_cut	247.5	9.63e-02 - 9.96e-01		2	41.76 - 42.95	4	11	63	84	1.17e-01 - 9.96e-01	39.1 - 198.7	39.1 - 198.7	1138.2194; 1138.2185; 1138.2197; 1138.2186; 1138.2174; 1138.2175	1138.22	2.73; 1.89; 3.00; 1.98; 0.90; 0.99	-1	4548.84	12; 13; 18; 22; 24	9.134e+05 - 2.658e+06	41.76 - 42.95	12; 13; 18; 22; 24-14945	HexNAc(3)Hex(7)NeuAc(1)Phospho(1)
47.1	75200	42.9700	14945	sp|A0A0C4DH35|HV335_HUMAN Probable non-functional immunoglobulin heavy variable 3-35 OS=Homo sapiens OX=9606 GN=IGHV3-35 PE=1 SV=1	A0A0C4DH35	N	73	73	K.GLEWVSGVSWnGSRTHYADSVK.G	HexNAc(3)Hex(7)NeuAc(1)Phospho(1)	Uncertain			SA	a	4548.8486	NGlycan/2114.6696	1	a_hIgA-SA-GLTrFASP-FZpipHILIC_E1_step.raw_20240829_noglyc_spec_cut	135.09	0.93	20800000	2	42.95	4	11	63	84	0.93	67.5	67.5	1138.2194	1138.22	2.73	-1	4548.84	12	2.66e+06	42.95	12-14945	HexNAc(3)Hex(7)NeuAc(1)Phospho(1)
47.2	81856	42.2500	13598	sp|A0A0C4DH35|HV335_HUMAN Probable non-functional immunoglobulin heavy variable 3-35 OS=Homo sapiens OX=9606 GN=IGHV3-35 PE=1 SV=1	A0A0C4DH35	N	73	73	K.GLEWVSGVSWnGSRTHYADSVK.G	HexNAc(3)Hex(7)NeuAc(1)Phospho(1)	Uncertain			AR	d	4548.8448	NGlycan/2114.6696	1	d_hIgA-AR-GLTrFASP-FZpipHILIC_217mAbs-Dil1-5_D_step.raw_20240829_noglyc_spec_cut	220.22	0.58	6090000	2	42.22	4	11	63	84	0.58	138.1	138.1	1138.2185	1138.22	1.89	-1	4548.84	13	9.13e+05	42.22	13-13598	HexNAc(3)Hex(7)NeuAc(1)Phospho(1)
47.3	130699; 130700	42.2100; 42.3400	13562; 13608	sp|A0A0C4DH35|HV335_HUMAN Probable non-functional immunoglobulin heavy variable 3-35 OS=Homo sapiens OX=9606 GN=IGHV3-35 PE=1 SV=1	A0A0C4DH35	N	73	73	K.GLEWVSGVSWnGSRTHYADSVK.G	HexNAc(3)Hex(7)NeuAc(1)Phospho(1)	Uncertain			AR	c	4548.8452; 4548.8403	NGlycan/2114.6696	1	c_hIgA-AR-GLTrFASP-FZpipHILIC_209mAbs-Dil1-5_D_step.raw_20240829_noglyc_spec_cut	247.5	9.63e-02 - 2.64e-01	10200000	2	42.26	4	11	63	84	1.17e-01 - 3.16e-01	106.5 - 198.7	106.5 - 198.7	1138.2186; 1138.2174	1138.22	1.98; 0.90	-1	4548.84	22	1.05e+06	42.26	22-13562	HexNAc(3)Hex(7)NeuAc(1)Phospho(1)
47.3.2	130700	42.3400	13608	sp|A0A0C4DH35|HV335_HUMAN Probable non-functional immunoglobulin heavy variable 3-35 OS=Homo sapiens OX=9606 GN=IGHV3-35 PE=1 SV=1	A0A0C4DH35	N	73	73	K.GLEWVSGVSWnGSRTHYADSVK.G	HexNAc(3)Hex(7)NeuAc(1)Phospho(1)	Uncertain			AR	c	4548.8403	NGlycan/2114.6696	0	c_hIgA-AR-GLTrFASP-FZpipHILIC_209mAbs-Dil1-5_D_step.raw_20240829_noglyc_spec_cut	153.48	0.26	10200000	2	42.26	4	11	63	84	0.32	106.5	106.5	1138.2174	1138.22	0.90	-1	4548.84	22	1.05e+06	42.26	22-13608	HexNAc(3)Hex(7)NeuAc(1)Phospho(1)
47.4	142246	41.8000	13802	sp|A0A0C4DH35|HV335_HUMAN Probable non-functional immunoglobulin heavy variable 3-35 OS=Homo sapiens OX=9606 GN=IGHV3-35 PE=1 SV=1	A0A0C4DH35	N	73	73	K.GLEWVSGVSWnGSRTHYADSVK.G	HexNAc(3)Hex(7)NeuAc(1)Phospho(1)	Uncertain			AR	d	4548.8407	NGlycan/2114.6696	1	d_hIgA-AR-GLTrFASP-FZpipHILIC_35mAbs_E1_step.raw_20240829_noglyc_spec_cut	142.02	0.18	16900000	2	41.76	4	11	63	84	0.18	87.8	87.8	1138.2175	1138.22	0.99	-1	4548.84	24	1.86e+06	41.76	24-13802	HexNAc(3)Hex(7)NeuAc(1)Phospho(1)
48	3581; 3610; 11736; 11738; 16269; 16319; 16320; 16325; 16330; 16335; 16340; 16357; 16361; 31400; 36137; 36149; 36152; 36173; 36183; 43375; 51064; 51066; 55752; 55756; 55775; 55781; 70715; 70716; 74753; 74801; 74802; 74804; 74816; 74838; 74852; 81771; 81779; 81793; 92453; 92454; 98126; 98143; 105652; 115027; 115047; 124575; 124578; 130602; 141981	36.2500; 36.5400; 35.9200; 35.9900; 33.2400; 35.4000; 35.4500; 35.5200; 35.6800; 35.7400; 35.7800; 35.9800; 36.0400; 35.8500; 35.5000; 35.7000; 36.0000; 35.8200; 35.7100; 35.7900; 36.0800; 36.1500; 36.1700; 33.1700; 35.4100; 35.6200; 36.0900; 36.4500; 35.2600; 35.5100; 36.9300; 35.2800; 35.1300; 36.8500; 35.1900; 35.3400; 37.0500; 35.1700; 35.2300; 35.6400; 35.0800	11357; 11465; 12863; 12891; 11999; 12836; 12852; 12880; 12944; 12967; 12984; 13062; 13083; 12672; 13053; 13132; 13147; 13216; 13247; 11870; 12525; 12542; 13163; 13194; 13274; 13310; 13099; 13106; 11114; 11980; 11997; 12063; 12125; 12245; 12386; 10931; 11027; 11576; 11072; 11080; 10743; 11401; 11048; 10894; 11553; 11133; 11153; 11064; 11179	sp|A0A0C4DH35|HV335_HUMAN Probable non-functional immunoglobulin heavy variable 3-35 OS=Homo sapiens OX=9606 GN=IGHV3-35 PE=1 SV=1	A0A0C4DH35	N	73	73	K.GLEWVSGVSWnGSRTHYADSVK.G	HexNAc(5)Hex(5)NeuAc(1)	Uncertain			SA	a	4550.9299; 4550.9276; 4550.9292; 4550.9331; 4550.9241; 4550.9089; 4550.9074; 4550.9046; 4550.9179; 4550.9236; 4550.9315; 4550.9287; 4550.9288; 4550.9304; 4550.9054; 4550.9290; 4550.9241; 4550.9311; 4550.9272; 4550.9285; 4550.9348; 4550.9314; 4550.9218; 4550.9306; 4550.9293; 4550.9341; 4550.9339; 4550.9315; 4550.9194; 4550.9048; 4550.9067; 4550.9053; 4550.9282; 4550.9287; 4550.9246; 4550.9295; 455…	NGlycan/2116.7564	2	a_hIgA-SA-GLTrFASP-FZpipHILIC_E2_step.raw_20240829_noglyc_spec_cut; b_hIgA-SA-GLTrFASP-FZpipHILIC_D_step.raw_20240829_noglyc_spec_cut; b_hIgA-SA-GLTrFASP-FZpipHILIC_E1_step.raw_20240829_noglyc_spec_cut; c_hIgA-SA-GLTrFASP-FZpipHILIC_D_step.raw_20240829_noglyc_spec_cut; c_hIgA-SA-GLTrFASP-FZpipHILIC_E1_step.raw_20240829_noglyc_spec_cut; c_hIgA-SA-GLTrFASP-FZpipHILIC_E2_step.raw_20240829_noglyc_spe…	406.24	3.75e-04 - 1.00e+00		2	35.08 - 36.14	4	11	63	84	5.73e-03 - 1.00e+00	1.0 - 288.8	0.1 - 41.7	1138.7398; 1138.7392; 1138.7396; 1138.7406; 1138.7383; 1138.7345; 1138.7341; 1138.7334; 1138.7367; 1138.7382; 1138.7402; 1138.7395; 1138.7395; 1138.7399; 1138.7336; 1138.7395; 1138.7383; 1138.7401; 1138.7391; 1138.7394; 1138.7410; 1138.7401; 1138.7377; 1138.7399; 1138.7396; 1138.7408; 1138.7408; 1138.7401; 1138.7371; 1138.7335; 1138.7340; 1138.7336; 1138.7393; 1138.7395; 1138.7384; 1138.7397; 113…	1138.74	1.53; 1.02; 1.37; 2.23; 0.26; -3.10; -3.41; -4.05; -1.12; 0.15; 1.88; 1.27; 1.28; 1.63; -3.86; 1.33; 0.26; 1.80; 0.94; 1.22; 2.60; 1.86; -0.26; 1.68; 1.38; 2.45; 2.40; 1.87; -0.78; -3.99; -3.57; -3.88; 1.16; 1.26; 0.35; 1.45; 0.37; -2.52; 1.64; 1.01; 1.43; -2.99; 2.24; 1.64; -2.29; 2.08; 1.98; 1.64; 2.32	-1 - 0	4550.92	1; 2; 3; 5; 6; 7; 8; 9; 11; 12; 13; 15; 16; 18; 19; 21; 22; 24	4.055e+06 - 1.612e+07	35.08 - 36.14	1; 2; 3; 5; 6; 7; 8; 9; 11; 12; 13; 15; 16; 18; 19; 21; 22; 24-11357	HexNAc(5)Hex(5)NeuAc(1)
48.1	3581; 3610	36.2500; 36.5400	11357; 11465	sp|A0A0C4DH35|HV335_HUMAN Probable non-functional immunoglobulin heavy variable 3-35 OS=Homo sapiens OX=9606 GN=IGHV3-35 PE=1 SV=1	A0A0C4DH35	N	73	73	K.GLEWVSGVSWnGSRTHYADSVK.G	HexNAc(5)Hex(5)NeuAc(1)	Uncertain			SA	a	4550.9299; 4550.9276	NGlycan/2116.7564	1	a_hIgA-SA-GLTrFASP-FZpipHILIC_E2_step.raw_20240829_noglyc_spec_cut	130.85	9.71e-01 - 9.99e-01	250000000	2	35.99	4	11	63	84	9.71e-01 - 9.99e-01	39.7 - 107.3	0.1 - 19.4	1138.7398; 1138.7392	1138.74	1.53; 1.02	-1 - 0	4550.92	1	1.61e+07	35.99	1-11357	HexNAc(5)Hex(5)NeuAc(1)
48.1.1	3610	36.5400	11465	sp|A0A0C4DH35|HV335_HUMAN Probable non-functional immunoglobulin heavy variable 3-35 OS=Homo sapiens OX=9606 GN=IGHV3-35 PE=1 SV=1	A0A0C4DH35	N	73	73	K.GLEWVSGVSWnGSRTHYADSVK.G	HexNAc(5)Hex(5)NeuAc(1)	Uncertain			SA	a	4550.9276	NGlycan/2116.7564	0	a_hIgA-SA-GLTrFASP-FZpipHILIC_E2_step.raw_20240829_noglyc_spec_cut	130.85	0.97	250000000	2	35.99	4	11	63	84	0.97	107.3	19.4	1138.7392	1138.74	1.02	-1	4550.92	1	1.61e+07	35.99	1-11465	HexNAc(5)Hex(5)NeuAc(1)
48.2	11736; 11738	35.9200; 35.9900	12863; 12891	sp|A0A0C4DH35|HV335_HUMAN Probable non-functional immunoglobulin heavy variable 3-35 OS=Homo sapiens OX=9606 GN=IGHV3-35 PE=1 SV=1	A0A0C4DH35	N	73	73	K.GLEWVSGVSWnGSRTHYADSVK.G	HexNAc(5)Hex(5)NeuAc(1)	Uncertain			SA	b	4550.9292; 4550.9331	NGlycan/2116.7564	1	b_hIgA-SA-GLTrFASP-FZpipHILIC_D_step.raw_20240829_noglyc_spec_cut	249.58	6.75e-02 - 1.02e-01	66300000	2	35.95	4	11	63	84	6.75e-02 - 1.02e-01	96.8 - 121.7	28.0 - 36.2	1138.7396; 1138.7406	1138.74	1.37; 2.23	0	4550.92	2	4.8e+06	35.95	2-12863	HexNAc(5)Hex(5)NeuAc(1)
48.2.2	11738	35.9900	12891	sp|A0A0C4DH35|HV335_HUMAN Probable non-functional immunoglobulin heavy variable 3-35 OS=Homo sapiens OX=9606 GN=IGHV3-35 PE=1 SV=1	A0A0C4DH35	N	73	73	K.GLEWVSGVSWnGSRTHYADSVK.G	HexNAc(5)Hex(5)NeuAc(1)	Uncertain			SA	b	4550.9331	NGlycan/2116.7564	0	b_hIgA-SA-GLTrFASP-FZpipHILIC_D_step.raw_20240829_noglyc_spec_cut	249.58	0.067	66300000	2	35.95	4	11	63	84	0.067	121.7	36.2	1138.7406	1138.74	2.23	0	4550.92	2	4.8e+06	35.95	2-12891	HexNAc(5)Hex(5)NeuAc(1)
48.3	16269; 16319; 16320; 16325; 16330; 16335; 16340; 16357; 16361	33.2400; 35.4000; 35.4500; 35.5200; 35.6800; 35.7400; 35.7800; 35.9800; 36.0400	11999; 12836; 12852; 12880; 12944; 12967; 12984; 13062; 13083	sp|A0A0C4DH35|HV335_HUMAN Probable non-functional immunoglobulin heavy variable 3-35 OS=Homo sapiens OX=9606 GN=IGHV3-35 PE=1 SV=1	A0A0C4DH35	N	73	73	K.GLEWVSGVSWnGSRTHYADSVK.G	HexNAc(5)Hex(5)NeuAc(1)	Uncertain			SA	b	4550.9241; 4550.9089; 4550.9074; 4550.9046; 4550.9179; 4550.9236; 4550.9315; 4550.9287; 4550.9288	NGlycan/2116.7564	1	b_hIgA-SA-GLTrFASP-FZpipHILIC_E1_step.raw_20240829_noglyc_spec_cut	320.57	7.50e-03 - 1.00e+00	553000000	2	35.89	4	11	63	84	7.50e-03 - 1.00e+00	1.1 - 224.5	1.1 - 36.2	1138.7383; 1138.7345; 1138.7341; 1138.7334; 1138.7367; 1138.7382; 1138.7402; 1138.7395; 1138.7395	1138.74	0.26; -3.10; -3.41; -4.05; -1.12; 0.15; 1.88; 1.27; 1.28	-1 - 0	4550.92	3	1.37e+07	35.89	3-11999	HexNAc(5)Hex(5)NeuAc(1)
48.3.1	16319	35.4000	12836	sp|A0A0C4DH35|HV335_HUMAN Probable non-functional immunoglobulin heavy variable 3-35 OS=Homo sapiens OX=9606 GN=IGHV3-35 PE=1 SV=1	A0A0C4DH35	N	73	73	K.GLEWVSGVSWnGSRTHYADSVK.G	HexNAc(5)Hex(5)NeuAc(1)	Uncertain			SA	b	4550.9089	NGlycan/2116.7564	0	b_hIgA-SA-GLTrFASP-FZpipHILIC_E1_step.raw_20240829_noglyc_spec_cut	192.94	0.96	553000000	2	35.89	4	11	63	84	0.96	119.3	23.8	1138.7345	1138.74	-3.10	-1	4550.92	3	1.37e+07	35.89	3-12836	HexNAc(5)Hex(5)NeuAc(1)
48.3.2	16325	35.5200	12880	sp|A0A0C4DH35|HV335_HUMAN Probable non-functional immunoglobulin heavy variable 3-35 OS=Homo sapiens OX=9606 GN=IGHV3-35 PE=1 SV=1	A0A0C4DH35	N	73	73	K.GLEWVSGVSWnGSRTHYADSVK.G	HexNAc(5)Hex(5)NeuAc(1)	Uncertain			SA	b	4550.9046	NGlycan/2116.7564	0	b_hIgA-SA-GLTrFASP-FZpipHILIC_E1_step.raw_20240829_noglyc_spec_cut	269.43	0.24	553000000	2	35.89	4	11	63	84	0.24	224.5	20.5	1138.7334	1138.74	-4.05	-1	4550.92	3	1.37e+07	35.89	3-12880	HexNAc(5)Hex(5)NeuAc(1)
48.3.3	16330	35.6800	12944	sp|A0A0C4DH35|HV335_HUMAN Probable non-functional immunoglobulin heavy variable 3-35 OS=Homo sapiens OX=9606 GN=IGHV3-35 PE=1 SV=1	A0A0C4DH35	N	73	73	K.GLEWVSGVSWnGSRTHYADSVK.G	HexNAc(5)Hex(5)NeuAc(1)	Uncertain			SA	b	4550.9179	NGlycan/2116.7564	0	b_hIgA-SA-GLTrFASP-FZpipHILIC_E1_step.raw_20240829_noglyc_spec_cut	268.07	0.11	553000000	2	35.89	4	11	63	84	0.11	171.1	22.2	1138.7367	1138.74	-1.12	0	4550.92	3	1.37e+07	35.89	3-12944	HexNAc(5)Hex(5)NeuAc(1)
48.3.4	16340	35.7800	12984	sp|A0A0C4DH35|HV335_HUMAN Probable non-functional immunoglobulin heavy variable 3-35 OS=Homo sapiens OX=9606 GN=IGHV3-35 PE=1 SV=1	A0A0C4DH35	N	73	73	K.GLEWVSGVSWnGSRTHYADSVK.G	HexNAc(5)Hex(5)NeuAc(1)	Uncertain			SA	b	4550.9315	NGlycan/2116.7564	0	b_hIgA-SA-GLTrFASP-FZpipHILIC_E1_step.raw_20240829_noglyc_spec_cut	140.41	0.76	553000000	2	35.89	4	11	63	84	0.76	74.1	21.6	1138.7402	1138.74	1.88	0	4550.92	3	1.37e+07	35.89	3-12984	HexNAc(5)Hex(5)NeuAc(1)
48.3.5	16357	35.9800	13062	sp|A0A0C4DH35|HV335_HUMAN Probable non-functional immunoglobulin heavy variable 3-35 OS=Homo sapiens OX=9606 GN=IGHV3-35 PE=1 SV=1	A0A0C4DH35	N	73	73	K.GLEWVSGVSWnGSRTHYADSVK.G	HexNAc(5)Hex(5)NeuAc(1)	Uncertain			SA	b	4550.9287	NGlycan/2116.7564	0	b_hIgA-SA-GLTrFASP-FZpipHILIC_E1_step.raw_20240829_noglyc_spec_cut	320.57	0.0075	553000000	2	35.89	4	11	63	84	0.0075	201.5	28.0	1138.7395	1138.74	1.27	0	4550.92	3	1.37e+07	35.89	3-13062	HexNAc(5)Hex(5)NeuAc(1)
48.3.6	16361	36.0400	13083	sp|A0A0C4DH35|HV335_HUMAN Probable non-functional immunoglobulin heavy variable 3-35 OS=Homo sapiens OX=9606 GN=IGHV3-35 PE=1 SV=1	A0A0C4DH35	N	73	73	K.GLEWVSGVSWnGSRTHYADSVK.G	HexNAc(5)Hex(5)NeuAc(1)	Uncertain			SA	b	4550.9288	NGlycan/2116.7564	0	b_hIgA-SA-GLTrFASP-FZpipHILIC_E1_step.raw_20240829_noglyc_spec_cut	245.91	0.096	553000000	2	35.89	4	11	63	84	0.096	124.1	36.2	1138.7395	1138.74	1.28	0	4550.92	3	1.37e+07	35.89	3-13083	HexNAc(5)Hex(5)NeuAc(1)
48.4	31400	35.8500	12672	sp|A0A0C4DH35|HV335_HUMAN Probable non-functional immunoglobulin heavy variable 3-35 OS=Homo sapiens OX=9606 GN=IGHV3-35 PE=1 SV=1	A0A0C4DH35	N	73	73	K.GLEWVSGVSWnGSRTHYADSVK.G	HexNAc(5)Hex(5)NeuAc(1)	Uncertain			SA	c	4550.9304	NGlycan/2116.7564	1	c_hIgA-SA-GLTrFASP-FZpipHILIC_D_step.raw_20240829_noglyc_spec_cut	172.42	0.52	57300000	2	35.84	4	11	63	84	0.52	95.5	27.0	1138.7399	1138.74	1.63	0	4550.92	5	5.5e+06	35.84	5-12672	HexNAc(5)Hex(5)NeuAc(1)
48.5	36137; 36149; 36152; 36173; 36183	35.5000; 35.7000; 35.7400; 35.9200; 36.0000	13053; 13132; 13147; 13216; 13247	sp|A0A0C4DH35|HV335_HUMAN Probable non-functional immunoglobulin heavy variable 3-35 OS=Homo sapiens OX=9606 GN=IGHV3-35 PE=1 SV=1	A0A0C4DH35	N	73	73	K.GLEWVSGVSWnGSRTHYADSVK.G	HexNAc(5)Hex(5)NeuAc(1)	Uncertain			SA	c	4550.9054; 4550.9290; 4550.9241; 4550.9311; 4550.9272	NGlycan/2116.7564	1	c_hIgA-SA-GLTrFASP-FZpipHILIC_E1_step.raw_20240829_noglyc_spec_cut	315.43	1.92e-02 - 9.99e-01	316000000	2	35.56	4	11	63	84	1.92e-02 - 9.99e-01	25.1 - 288.8	11.7 - 36.6	1138.7336; 1138.7395; 1138.7383; 1138.7401; 1138.7391	1138.74	-3.86; 1.33; 0.26; 1.80; 0.94	-1 - 0	4550.92	6	1.45e+07	35.56	6-13053	HexNAc(5)Hex(5)NeuAc(1)
48.5.2	36149	35.7000	13132	sp|A0A0C4DH35|HV335_HUMAN Probable non-functional immunoglobulin heavy variable 3-35 OS=Homo sapiens OX=9606 GN=IGHV3-35 PE=1 SV=1	A0A0C4DH35	N	73	73	K.GLEWVSGVSWnGSRTHYADSVK.G	HexNAc(5)Hex(5)NeuAc(1)	Uncertain			SA	c	4550.9290	NGlycan/2116.7564	0	c_hIgA-SA-GLTrFASP-FZpipHILIC_E1_step.raw_20240829_noglyc_spec_cut	104.96	0.96	316000000	2	35.56	4	11	63	84	0.96	25.1	14.5	1138.7395	1138.74	1.33	0	4550.92	6	1.45e+07	35.56	6-13132	HexNAc(5)Hex(5)NeuAc(1)
48.5.3	36152	35.7400	13147	sp|A0A0C4DH35|HV335_HUMAN Probable non-functional immunoglobulin heavy variable 3-35 OS=Homo sapiens OX=9606 GN=IGHV3-35 PE=1 SV=1	A0A0C4DH35	N	73	73	K.GLEWVSGVSWnGSRTHYADSVK.G	HexNAc(5)Hex(5)NeuAc(1)	Uncertain			SA	c	4550.9241	NGlycan/2116.7564	0	c_hIgA-SA-GLTrFASP-FZpipHILIC_E1_step.raw_20240829_noglyc_spec_cut	137.29	0.95	316000000	2	35.56	4	11	63	84	0.95	57.1	14.1	1138.7383	1138.74	0.26	0	4550.92	6	1.45e+07	35.56	6-13147	HexNAc(5)Hex(5)NeuAc(1)
48.5.4	36173	35.9200	13216	sp|A0A0C4DH35|HV335_HUMAN Probable non-functional immunoglobulin heavy variable 3-35 OS=Homo sapiens OX=9606 GN=IGHV3-35 PE=1 SV=1	A0A0C4DH35	N	73	73	K.GLEWVSGVSWnGSRTHYADSVK.G	HexNAc(5)Hex(5)NeuAc(1)	Uncertain			SA	c	4550.9311	NGlycan/2116.7564	0	c_hIgA-SA-GLTrFASP-FZpipHILIC_E1_step.raw_20240829_noglyc_spec_cut	149.98	0.96	316000000	2	35.56	4	11	63	84	0.96	26.1	26.1	1138.7401	1138.74	1.80	0	4550.92	6	1.45e+07	35.56	6-13216	HexNAc(5)Hex(5)NeuAc(1)
48.5.5	36183	36.0000	13247	sp|A0A0C4DH35|HV335_HUMAN Probable non-functional immunoglobulin heavy variable 3-35 OS=Homo sapiens OX=9606 GN=IGHV3-35 PE=1 SV=1	A0A0C4DH35	N	73	73	K.GLEWVSGVSWnGSRTHYADSVK.G	HexNAc(5)Hex(5)NeuAc(1)	Uncertain			SA	c	4550.9272	NGlycan/2116.7564	0	c_hIgA-SA-GLTrFASP-FZpipHILIC_E1_step.raw_20240829_noglyc_spec_cut	315.43	0.019	316000000	2	35.56	4	11	63	84	0.019	288.8	36.6	1138.7391	1138.74	0.94	-1	4550.92	6	1.45e+07	35.56	6-13247	HexNAc(5)Hex(5)NeuAc(1)
48.6	51064; 51066	35.7800; 35.8200	12525; 12542	sp|A0A0C4DH35|HV335_HUMAN Probable non-functional immunoglobulin heavy variable 3-35 OS=Homo sapiens OX=9606 GN=IGHV3-35 PE=1 SV=1	A0A0C4DH35	N	73	73	K.GLEWVSGVSWnGSRTHYADSVK.G	HexNAc(5)Hex(5)NeuAc(1)	Uncertain			SA	d	4550.9348; 4550.9314	NGlycan/2116.7564	1	d_hIgA-SA-GLTrFASP-FZpipHILIC_D_step.raw_20240829_noglyc_spec_cut	232.15	5.20e-03 - 9.88e-03	41600000	2	35.80	4	11	63	84	6.05e-02 - 1.10e-01	93.3 - 147.5	22.3 - 25.1	1138.7410; 1138.7401	1138.74	2.60; 1.86	-1 - 0	4550.92	8	4.68e+06	35.80	8-12525	HexNAc(5)Hex(5)NeuAc(1)
48.6.2	51066	35.8200	12542	sp|A0A0C4DH35|HV335_HUMAN Probable non-functional immunoglobulin heavy variable 3-35 OS=Homo sapiens OX=9606 GN=IGHV3-35 PE=1 SV=1	A0A0C4DH35	N	73	73	K.GLEWVSGVSWnGSRTHYADSVK.G	HexNAc(5)Hex(5)NeuAc(1)	Uncertain			SA	d	4550.9314	NGlycan/2116.7564	0	d_hIgA-SA-GLTrFASP-FZpipHILIC_D_step.raw_20240829_noglyc_spec_cut	190.5	0.0052	41600000	2	35.80	4	11	63	84	0.061	93.3	25.1	1138.7401	1138.74	1.86	0	4550.92	8	4.68e+06	35.80	8-12542	HexNAc(5)Hex(5)NeuAc(1)
48.7	55752; 55756; 55775; 55781	35.7100; 35.7900; 35.9900; 36.0800	13163; 13194; 13274; 13310	sp|A0A0C4DH35|HV335_HUMAN Probable non-functional immunoglobulin heavy variable 3-35 OS=Homo sapiens OX=9606 GN=IGHV3-35 PE=1 SV=1	A0A0C4DH35	N	73	73	K.GLEWVSGVSWnGSRTHYADSVK.G	HexNAc(5)Hex(5)NeuAc(1)	Uncertain			SA	d	4550.9218; 4550.9306; 4550.9293; 4550.9341	NGlycan/2116.7564	1	d_hIgA-SA-GLTrFASP-FZpipHILIC_E1_step.raw_20240829_noglyc_spec_cut	356.98	1.06e-02 - 9.95e-01	192000000	2	35.80	4	11	63	84	1.06e-02 - 9.95e-01	60.7 - 178.7	24.8 - 29.8	1138.7377; 1138.7399; 1138.7396; 1138.7408	1138.74	-0.26; 1.68; 1.38; 2.45	-1 - 0	4550.92	9	1.13e+07	35.80	9-13163	HexNAc(5)Hex(5)NeuAc(1)
48.7.2	55775	35.9900	13274	sp|A0A0C4DH35|HV335_HUMAN Probable non-functional immunoglobulin heavy variable 3-35 OS=Homo sapiens OX=9606 GN=IGHV3-35 PE=1 SV=1	A0A0C4DH35	N	73	73	K.GLEWVSGVSWnGSRTHYADSVK.G	HexNAc(5)Hex(5)NeuAc(1)	Uncertain			SA	d	4550.9293	NGlycan/2116.7564	0	d_hIgA-SA-GLTrFASP-FZpipHILIC_E1_step.raw_20240829_noglyc_spec_cut	356.98	0.011	192000000	2	35.80	4	11	63	84	0.011	178.7	24.8	1138.7396	1138.74	1.38	0	4550.92	9	1.13e+07	35.80	9-13274	HexNAc(5)Hex(5)NeuAc(1)
48.7.3	55781	36.0800	13310	sp|A0A0C4DH35|HV335_HUMAN Probable non-functional immunoglobulin heavy variable 3-35 OS=Homo sapiens OX=9606 GN=IGHV3-35 PE=1 SV=1	A0A0C4DH35	N	73	73	K.GLEWVSGVSWnGSRTHYADSVK.G	HexNAc(5)Hex(5)NeuAc(1)	Uncertain			SA	d	4550.9341	NGlycan/2116.7564	0	d_hIgA-SA-GLTrFASP-FZpipHILIC_E1_step.raw_20240829_noglyc_spec_cut	227.41	0.89	192000000	2	35.80	4	11	63	84	0.89	125.7	26.3	1138.7408	1138.74	2.45	-1	4550.92	9	1.13e+07	35.80	9-13310	HexNAc(5)Hex(5)NeuAc(1)
48.8	70715; 70716	36.1500; 36.1700	13099; 13106	sp|A0A0C4DH35|HV335_HUMAN Probable non-functional immunoglobulin heavy variable 3-35 OS=Homo sapiens OX=9606 GN=IGHV3-35 PE=1 SV=1	A0A0C4DH35	N	73	73	K.GLEWVSGVSWnGSRTHYADSVK.G	HexNAc(5)Hex(5)NeuAc(1)	Uncertain			SA	a	4550.9339; 4550.9315	NGlycan/2116.7564	1	a_hIgA-SA-GLTrFASP-FZpipHILIC_D_step.raw_20240829_noglyc_spec_cut	365.94	3.75e-04 - 2.71e-03	57200000	2	36.14	4	11	63	84	5.73e-03 - 4.00e-02	164.3 - 197.0	28.0	1138.7408; 1138.7401	1138.74	2.40; 1.87	0	4550.92	11	4.06e+06	36.14	11-13099	HexNAc(5)Hex(5)NeuAc(1)
48.8.2	70716	36.1700	13106	sp|A0A0C4DH35|HV335_HUMAN Probable non-functional immunoglobulin heavy variable 3-35 OS=Homo sapiens OX=9606 GN=IGHV3-35 PE=1 SV=1	A0A0C4DH35	N	73	73	K.GLEWVSGVSWnGSRTHYADSVK.G	HexNAc(5)Hex(5)NeuAc(1)	Uncertain			SA	a	4550.9315	NGlycan/2116.7564	0	a_hIgA-SA-GLTrFASP-FZpipHILIC_D_step.raw_20240829_noglyc_spec_cut	365.94	0.00038	57200000	2	36.14	4	11	63	84	0.0057	197.0	28.0	1138.7401	1138.74	1.87	0	4550.92	11	4.06e+06	36.14	11-13106	HexNAc(5)Hex(5)NeuAc(1)
48.9	74753; 74801; 74802; 74804; 74816; 74838; 74852	33.1700; 35.4100; 35.4500; 35.6200; 35.7800; 36.0900; 36.4500	11114; 11980; 11997; 12063; 12125; 12245; 12386	sp|A0A0C4DH35|HV335_HUMAN Probable non-functional immunoglobulin heavy variable 3-35 OS=Homo sapiens OX=9606 GN=IGHV3-35 PE=1 SV=1	A0A0C4DH35	N	73	73	K.GLEWVSGVSWnGSRTHYADSVK.G	HexNAc(5)Hex(5)NeuAc(1)	Uncertain			SA	a	4550.9194; 4550.9048; 4550.9067; 4550.9053; 4550.9282; 4550.9287; 4550.9246	NGlycan/2116.7564	1	a_hIgA-SA-GLTrFASP-FZpipHILIC_E1_step.raw_20240829_noglyc_spec_cut	406.24	7.23e-02 - 1.00e+00	592000000	2	35.80	4	11	63	84	7.23e-02 - 1.00e+00	1.0 - 285.9	1.0 - 41.7	1138.7371; 1138.7335; 1138.7340; 1138.7336; 1138.7393; 1138.7395; 1138.7384	1138.74	-0.78; -3.99; -3.57; -3.88; 1.16; 1.26; 0.35	-1 - 0	4550.92	12	1.29e+07	35.80	12-11114	HexNAc(5)Hex(5)NeuAc(1)
48.9.1	74801	35.4100	11980	sp|A0A0C4DH35|HV335_HUMAN Probable non-functional immunoglobulin heavy variable 3-35 OS=Homo sapiens OX=9606 GN=IGHV3-35 PE=1 SV=1	A0A0C4DH35	N	73	73	K.GLEWVSGVSWnGSRTHYADSVK.G	HexNAc(5)Hex(5)NeuAc(1)	Uncertain			SA	a	4550.9048	NGlycan/2116.7564	0	a_hIgA-SA-GLTrFASP-FZpipHILIC_E1_step.raw_20240829_noglyc_spec_cut	132.82	0.98	592000000	2	35.80	4	11	63	84	0.98	73.2	41.7	1138.7335	1138.74	-3.99	0	4550.92	12	1.29e+07	35.80	12-11980	HexNAc(5)Hex(5)NeuAc(1)
48.9.2	74802	35.4500	11997	sp|A0A0C4DH35|HV335_HUMAN Probable non-functional immunoglobulin heavy variable 3-35 OS=Homo sapiens OX=9606 GN=IGHV3-35 PE=1 SV=1	A0A0C4DH35	N	73	73	K.GLEWVSGVSWnGSRTHYADSVK.G	HexNAc(5)Hex(5)NeuAc(1)	Uncertain			SA	a	4550.9067	NGlycan/2116.7564	0	a_hIgA-SA-GLTrFASP-FZpipHILIC_E1_step.raw_20240829_noglyc_spec_cut	267.17	0.45	592000000	2	35.80	4	11	63	84	0.45	134.7	28.0	1138.7340	1138.74	-3.57	-1	4550.92	12	1.29e+07	35.80	12-11997	HexNAc(5)Hex(5)NeuAc(1)
48.9.3	74804	35.6200	12063	sp|A0A0C4DH35|HV335_HUMAN Probable non-functional immunoglobulin heavy variable 3-35 OS=Homo sapiens OX=9606 GN=IGHV3-35 PE=1 SV=1	A0A0C4DH35	N	73	73	K.GLEWVSGVSWnGSRTHYADSVK.G	HexNAc(5)Hex(5)NeuAc(1)	Uncertain			SA	a	4550.9053	NGlycan/2116.7564	0	a_hIgA-SA-GLTrFASP-FZpipHILIC_E1_step.raw_20240829_noglyc_spec_cut	127.25	0.96	592000000	2	35.80	4	11	63	84	0.96	110.7	24.0	1138.7336	1138.74	-3.88	-1	4550.92	12	1.29e+07	35.80	12-12063	HexNAc(5)Hex(5)NeuAc(1)
48.9.4	74838	36.0900	12245	sp|A0A0C4DH35|HV335_HUMAN Probable non-functional immunoglobulin heavy variable 3-35 OS=Homo sapiens OX=9606 GN=IGHV3-35 PE=1 SV=1	A0A0C4DH35	N	73	73	K.GLEWVSGVSWnGSRTHYADSVK.G	HexNAc(5)Hex(5)NeuAc(1)	Uncertain			SA	a	4550.9287	NGlycan/2116.7564	0	a_hIgA-SA-GLTrFASP-FZpipHILIC_E1_step.raw_20240829_noglyc_spec_cut	139.36	0.45	592000000	2	35.80	4	11	63	84	0.45	121.4	28.0	1138.7395	1138.74	1.26	0	4550.92	12	1.29e+07	35.80	12-12245	HexNAc(5)Hex(5)NeuAc(1)
48.9.5	74852	36.4500	12386	sp|A0A0C4DH35|HV335_HUMAN Probable non-functional immunoglobulin heavy variable 3-35 OS=Homo sapiens OX=9606 GN=IGHV3-35 PE=1 SV=1	A0A0C4DH35	N	73	73	K.GLEWVSGVSWnGSRTHYADSVK.G	HexNAc(5)Hex(5)NeuAc(1)	Uncertain			SA	a	4550.9246	NGlycan/2116.7564	0	a_hIgA-SA-GLTrFASP-FZpipHILIC_E1_step.raw_20240829_noglyc_spec_cut	406.24	0.072	592000000	2	35.80	4	11	63	84	0.072	285.9	6.5	1138.7384	1138.74	0.35	-1	4550.92	12	1.29e+07	35.80	12-12386	HexNAc(5)Hex(5)NeuAc(1)
48.10	81771; 81779; 81793	35.2600; 35.5100; 36.9300	10931; 11027; 11576	sp|A0A0C4DH35|HV335_HUMAN Probable non-functional immunoglobulin heavy variable 3-35 OS=Homo sapiens OX=9606 GN=IGHV3-35 PE=1 SV=1	A0A0C4DH35	N	73	73	K.GLEWVSGVSWnGSRTHYADSVK.G	HexNAc(5)Hex(5)NeuAc(1)	Uncertain			AR	d	4550.9295; 4550.9247; 4550.9115	NGlycan/2116.7564	1	d_hIgA-AR-GLTrFASP-FZpipHILIC_217mAbs-Dil1-5_D_step.raw_20240829_noglyc_spec_cut	317.84	5.29e-02 - 6.58e-01	126000000	2	35.32	4	11	63	84	5.29e-02 - 6.58e-01	25.5 - 157.2	25.5 - 39.8	1138.7397; 1138.7384; 1138.7352	1138.74	1.45; 0.37; -2.52	0	4550.92	13	9.13e+06	35.32	13-10931	HexNAc(5)Hex(5)NeuAc(1)
48.10.2	81779	35.5100	11027	sp|A0A0C4DH35|HV335_HUMAN Probable non-functional immunoglobulin heavy variable 3-35 OS=Homo sapiens OX=9606 GN=IGHV3-35 PE=1 SV=1	A0A0C4DH35	N	73	73	K.GLEWVSGVSWnGSRTHYADSVK.G	HexNAc(5)Hex(5)NeuAc(1)	Uncertain			AR	d	4550.9247	NGlycan/2116.7564	0	d_hIgA-AR-GLTrFASP-FZpipHILIC_217mAbs-Dil1-5_D_step.raw_20240829_noglyc_spec_cut	304	0.053	126000000	2	35.32	4	11	63	84	0.053	157.2	28.0	1138.7384	1138.74	0.37	0	4550.92	13	9.13e+06	35.32	13-11027	HexNAc(5)Hex(5)NeuAc(1)
48.10.3	81793	36.9300	11576	sp|A0A0C4DH35|HV335_HUMAN Probable non-functional immunoglobulin heavy variable 3-35 OS=Homo sapiens OX=9606 GN=IGHV3-35 PE=1 SV=1	A0A0C4DH35	N	73	73	K.GLEWVSGVSWnGSRTHYADSVK.G	HexNAc(5)Hex(5)NeuAc(1)	Uncertain			AR	d	4550.9115	NGlycan/2116.7564	0	d_hIgA-AR-GLTrFASP-FZpipHILIC_217mAbs-Dil1-5_D_step.raw_20240829_noglyc_spec_cut	317.84	0.62	126000000	2	35.32	4	11	63	84	0.62	25.5	25.5	1138.7352	1138.74	-2.52	0	4550.92	13	9.13e+06	35.32	13-11576	HexNAc(5)Hex(5)NeuAc(1)
48.11	98126; 98143	35.1300; 36.8500	10743; 11401	sp|A0A0C4DH35|HV335_HUMAN Probable non-functional immunoglobulin heavy variable 3-35 OS=Homo sapiens OX=9606 GN=IGHV3-35 PE=1 SV=1	A0A0C4DH35	N	73	73	K.GLEWVSGVSWnGSRTHYADSVK.G	HexNAc(5)Hex(5)NeuAc(1)	Uncertain			AR	a	4550.9295; 4550.9093	NGlycan/2116.7564	1	a_hIgA-AR-GLTrFASP-FZpipHILIC_218mAbs-Dil1-5_D_step.raw_20240829_noglyc_spec_cut	355.59	1.12e-02 - 5.72e-02	96400000	2	35.21	4	11	63	84	1.12e-02 - 5.72e-02	80.3 - 117.2	19.6 - 20.3	1138.7397; 1138.7346	1138.74	1.43; -2.99	0	4550.92	16	6.07e+06	35.21	16-10743	HexNAc(5)Hex(5)NeuAc(1)
48.11.2	98143	36.8500	11401	sp|A0A0C4DH35|HV335_HUMAN Probable non-functional immunoglobulin heavy variable 3-35 OS=Homo sapiens OX=9606 GN=IGHV3-35 PE=1 SV=1	A0A0C4DH35	N	73	73	K.GLEWVSGVSWnGSRTHYADSVK.G	HexNAc(5)Hex(5)NeuAc(1)	Uncertain			AR	a	4550.9093	NGlycan/2116.7564	0	a_hIgA-AR-GLTrFASP-FZpipHILIC_218mAbs-Dil1-5_D_step.raw_20240829_noglyc_spec_cut	355.59	0.057	96400000	2	35.21	4	11	63	84	0.057	80.3	19.6	1138.7346	1138.74	-2.99	0	4550.92	16	6.07e+06	35.21	16-11401	HexNAc(5)Hex(5)NeuAc(1)
48.12	105652	35.1900	11048	sp|A0A0C4DH35|HV335_HUMAN Probable non-functional immunoglobulin heavy variable 3-35 OS=Homo sapiens OX=9606 GN=IGHV3-35 PE=1 SV=1	A0A0C4DH35	N	73	73	K.GLEWVSGVSWnGSRTHYADSVK.G	HexNAc(5)Hex(5)NeuAc(1)	Uncertain			AR	b	4550.9332	NGlycan/2116.7564	1	b_hIgA-AR-GLTrFASP-FZpipHILIC_47mAbs_E1_step.raw_20240829_noglyc_spec_cut	109.25	0.76	131000000	2	35.21	4	11	63	84	0.76	58.7	33.4	1138.7406	1138.74	2.24	0	4550.92	18	1.08e+07	35.21	18-11048	HexNAc(5)Hex(5)NeuAc(1)
48.13	115027; 115047	35.3400; 37.0500	10894; 11553	sp|A0A0C4DH35|HV335_HUMAN Probable non-functional immunoglobulin heavy variable 3-35 OS=Homo sapiens OX=9606 GN=IGHV3-35 PE=1 SV=1	A0A0C4DH35	N	73	73	K.GLEWVSGVSWnGSRTHYADSVK.G	HexNAc(5)Hex(5)NeuAc(1)	Uncertain			AR	b	4550.9304; 4550.9126	NGlycan/2116.7564	1	b_hIgA-AR-GLTrFASP-FZpipHILIC_214mAbs-Dil1-5_D_step.raw_20240829_noglyc_spec_cut	301.28	5.79e-01 - 5.96e-01	82900000	2	35.40	4	11	63	84	5.79e-01 - 5.96e-01	2.7 - 39.4	2.7 - 28.0	1138.7399; 1138.7354	1138.74	1.64; -2.29	0	4550.92	19	7.28e+06	35.40	19-10894	HexNAc(5)Hex(5)NeuAc(1)
48.13.1	115047	37.0500	11553	sp|A0A0C4DH35|HV335_HUMAN Probable non-functional immunoglobulin heavy variable 3-35 OS=Homo sapiens OX=9606 GN=IGHV3-35 PE=1 SV=1	A0A0C4DH35	N	73	73	K.GLEWVSGVSWnGSRTHYADSVK.G	HexNAc(5)Hex(5)NeuAc(1)	Uncertain			AR	b	4550.9126	NGlycan/2116.7564	0	b_hIgA-AR-GLTrFASP-FZpipHILIC_214mAbs-Dil1-5_D_step.raw_20240829_noglyc_spec_cut	301.28	0.58	82900000	2	35.40	4	11	63	84	0.58	2.7	2.7	1138.7354	1138.74	-2.29	0	4550.92	19	7.28e+06	35.40	19-11553	HexNAc(5)Hex(5)NeuAc(1)
48.14	124575; 124578	35.1700; 35.2300	11133; 11153	sp|A0A0C4DH35|HV335_HUMAN Probable non-functional immunoglobulin heavy variable 3-35 OS=Homo sapiens OX=9606 GN=IGHV3-35 PE=1 SV=1	A0A0C4DH35	N	73	73	K.GLEWVSGVSWnGSRTHYADSVK.G	HexNAc(5)Hex(5)NeuAc(1)	Uncertain			AR	c	4550.9324; 4550.9320	NGlycan/2116.7564	1	c_hIgA-AR-GLTrFASP-FZpipHILIC_55mAbs_E1_step.raw_20240829_noglyc_spec_cut	227.7	1.89e-01 - 9.47e-01	132000000	2	35.21	4	11	63	84	1.89e-01 - 9.47e-01	23.5 - 119.0	17.6 - 21.8	1138.7404; 1138.7403	1138.74	2.08; 1.98	0	4550.92	21	1.2e+07	35.21	21-11133	HexNAc(5)Hex(5)NeuAc(1)
48.14.1	124578	35.2300	11153	sp|A0A0C4DH35|HV335_HUMAN Probable non-functional immunoglobulin heavy variable 3-35 OS=Homo sapiens OX=9606 GN=IGHV3-35 PE=1 SV=1	A0A0C4DH35	N	73	73	K.GLEWVSGVSWnGSRTHYADSVK.G	HexNAc(5)Hex(5)NeuAc(1)	Uncertain			AR	c	4550.9320	NGlycan/2116.7564	0	c_hIgA-AR-GLTrFASP-FZpipHILIC_55mAbs_E1_step.raw_20240829_noglyc_spec_cut	227.7	0.19	132000000	2	35.21	4	11	63	84	0.19	119.0	17.6	1138.7403	1138.74	1.98	0	4550.92	21	1.2e+07	35.21	21-11153	HexNAc(5)Hex(5)NeuAc(1)
48.15	130602	35.6400	11064	sp|A0A0C4DH35|HV335_HUMAN Probable non-functional immunoglobulin heavy variable 3-35 OS=Homo sapiens OX=9606 GN=IGHV3-35 PE=1 SV=1	A0A0C4DH35	N	73	73	K.GLEWVSGVSWnGSRTHYADSVK.G	HexNAc(5)Hex(5)NeuAc(1)	Uncertain			AR	c	4550.9304	NGlycan/2116.7564	1	c_hIgA-AR-GLTrFASP-FZpipHILIC_209mAbs-Dil1-5_D_step.raw_20240829_noglyc_spec_cut	274.56	0.13	143000000	2	35.35	4	11	63	84	0.15	156.3	28.0	1138.7399	1138.74	1.64	0	4550.92	22	1.04e+07	35.35	22-11064	HexNAc(5)Hex(5)NeuAc(1)
49	11774; 11775; 16432; 16458; 16460; 16471; 16484; 16488; 16728; 17916; 31428; 36197; 36199; 36284; 36290; 36300; 36307; 51086; 55793; 55843; 55862; 55867; 55877; 74848; 74889; 74890; 74894; 74897; 74914; 74920; 74926; 74931; 74935; 74939; 81797	37.8000; 37.9800; 38.6900; 39.4100; 39.4200; 39.6500; 39.9400; 40.0200; 42.8000; 56.7500; 37.6500; 36.3800; 36.4100; 39.1900; 39.3200; 39.5100; 39.5700; 37.5500; 36.3900; 38.4500; 39.3500; 39.4700; 39.7100; 37.9000; 37.9200; 38.0400; 38.2800; 39.1300; 39.2000; 39.6200; 39.7000; 37.3000	13589; 13660; 14130; 14411; 14419; 14506; 14619; 14653; 15741; 20909; 13368; 13397; 13407; 14504; 14557; 14629; 13210; 13430; 14242; 14598; 14645; 14737; 12363; 12957; 12965; 13012; 13109; 13443; 13471; 13554; 13592; 13634; 13665; 11716	sp|A0A0C4DH35|HV335_HUMAN Probable non-functional immunoglobulin heavy variable 3-35 OS=Homo sapiens OX=9606 GN=IGHV3-35 PE=1 SV=1	A0A0C4DH35	N	73	73	K.GLEWVSGVSWnGSRTHYADSVK.G	HexNAc(5)Hex(5)Fuc(1)NeuAc(1)	Uncertain			SA	b	4696.9724; 4696.9743; 4696.9667; 4696.9716; 4696.9691; 4696.9695; 4696.9725; 4696.9726; 4696.9714; 4696.9692; 4696.9702; 4696.9749; 4696.9765; 4696.9739; 4696.9735; 4696.9726; 4696.9716; 4696.9673; 4696.9671; 4696.9738; 4696.9700; 4696.9722; 4696.9715; 4696.9683; 4696.9677; 4696.9640; 4696.9717; 4696.9620; 4696.9710; 4696.9705; 4696.9670; 4696.9738; 4696.9708; 4696.9719; 4696.9704	NGlycan/2262.8143	2	b_hIgA-SA-GLTrFASP-FZpipHILIC_D_step.raw_20240829_noglyc_spec_cut; b_hIgA-SA-GLTrFASP-FZpipHILIC_E1_step.raw_20240829_noglyc_spec_cut; c_hIgA-SA-GLTrFASP-FZpipHILIC_D_step.raw_20240829_noglyc_spec_cut; c_hIgA-SA-GLTrFASP-FZpipHILIC_E1_step.raw_20240829_noglyc_spec_cut; d_hIgA-SA-GLTrFASP-FZpipHILIC_D_step.raw_20240829_noglyc_spec_cut; d_hIgA-SA-GLTrFASP-FZpipHILIC_E1_step.raw_20240829_noglyc_spec…	354.35	6.35e-02 - 1.00e+00		2	37.28 - 38.62	4	11	63	84	9.47e-02 - 1.00e+00	9.8 - 260.6	1.1 - 32.0	1175.2504; 1175.2509; 1175.2489; 1175.2502; 1175.2496; 1175.2497; 1175.2504; 1175.2504; 1175.2501; 1175.2496; 1175.2498; 1175.2510; 1175.2514; 1175.2508; 1175.2506; 1175.2504; 1175.2502; 1175.2491; 1175.2490; 1175.2507; 1175.2498; 1175.2503; 1175.2502; 1175.2493; 1175.2492; 1175.2483; 1175.2502; 1175.2478; 1175.2500; 1175.2499; 1175.2490; 1175.2507; 1175.2500; 1175.2502; 1175.2499	1175.25	-1.81; -1.39; -3.02; -1.98; -2.50; -2.42; -1.78; -1.76; -2.03; -2.48; -2.28; -1.27; -0.94; -1.48; -1.57; -1.77; -1.98; -2.90; -2.94; -1.51; -2.33; -1.84; -1.99; -2.69; -2.80; -3.59; -1.96; -4.02; -2.11; -2.21; -2.96; -1.51; -2.14; -1.92; -2.23	-1 - 1	4696.98	2; 3; 5; 6; 8; 9; 12; 13	1.795e+06 - 5.983e+08	37.28 - 38.62	2; 3; 5; 6; 8; 9; 12; 13-13589	HexNAc(5)Hex(5)Fuc(1)NeuAc(1)
49.1	11774; 11775	37.8000; 37.9800	13589; 13660	sp|A0A0C4DH35|HV335_HUMAN Probable non-functional immunoglobulin heavy variable 3-35 OS=Homo sapiens OX=9606 GN=IGHV3-35 PE=1 SV=1	A0A0C4DH35	N	73	73	K.GLEWVSGVSWnGSRTHYADSVK.G	HexNAc(5)Hex(5)Fuc(1)NeuAc(1)	Uncertain			SA	b	4696.9724; 4696.9743	NGlycan/2262.8143	1	b_hIgA-SA-GLTrFASP-FZpipHILIC_D_step.raw_20240829_noglyc_spec_cut	354.35	9.47e-02 - 2.29e-01	45500000	2	37.77	4	11	63	84	9.47e-02 - 2.29e-01	89.5 - 260.6	12.7 - 18.8	1175.2504; 1175.2509	1175.25	-1.81; -1.39	-1 - 0	4696.98	2	5.49e+06	37.77	2-13589	HexNAc(5)Hex(5)Fuc(1)NeuAc(1)
49.1.2	11775	37.9800	13660	sp|A0A0C4DH35|HV335_HUMAN Probable non-functional immunoglobulin heavy variable 3-35 OS=Homo sapiens OX=9606 GN=IGHV3-35 PE=1 SV=1	A0A0C4DH35	N	73	73	K.GLEWVSGVSWnGSRTHYADSVK.G	HexNAc(5)Hex(5)Fuc(1)NeuAc(1)	Uncertain			SA	b	4696.9743	NGlycan/2262.8143	0	b_hIgA-SA-GLTrFASP-FZpipHILIC_D_step.raw_20240829_noglyc_spec_cut	354.35	0.095	45500000	2	37.77	4	11	63	84	0.095	260.6	18.8	1175.2509	1175.25	-1.39	-1	4696.98	2	5.49e+06	37.77	2-13660	HexNAc(5)Hex(5)Fuc(1)NeuAc(1)
49.2	16432; 16458; 16460; 16471; 16484; 16488; 16728; 17916	38.6900; 39.4100; 39.4200; 39.6500; 39.9400; 40.0200; 42.8000; 56.7500	14130; 14411; 14419; 14506; 14619; 14653; 15741; 20909	sp|A0A0C4DH35|HV335_HUMAN Probable non-functional immunoglobulin heavy variable 3-35 OS=Homo sapiens OX=9606 GN=IGHV3-35 PE=1 SV=1	A0A0C4DH35	N	73	73	K.GLEWVSGVSWnGSRTHYADSVK.G	HexNAc(5)Hex(5)Fuc(1)NeuAc(1)	Uncertain			SA	b	4696.9667; 4696.9716; 4696.9691; 4696.9695; 4696.9725; 4696.9726; 4696.9714; 4696.9692	NGlycan/2262.8143	1	b_hIgA-SA-GLTrFASP-FZpipHILIC_E1_step.raw_20240829_noglyc_spec_cut	268.07	4.79e-01 - 1.00e+00	359000000	2	38.62	4	11	63	84	4.79e-01 - 1.00e+00	9.8 - 141.3	3.0 - 23.7	1175.2489; 1175.2502; 1175.2496; 1175.2497; 1175.2504; 1175.2504; 1175.2501; 1175.2496	1175.25	-3.02; -1.98; -2.50; -2.42; -1.78; -1.76; -2.03; -2.48	0 - 1	4696.98	3	5.85e+06	38.62	3-14130	HexNAc(5)Hex(5)Fuc(1)NeuAc(1)
49.2.1	16458	39.4100	14411	sp|A0A0C4DH35|HV335_HUMAN Probable non-functional immunoglobulin heavy variable 3-35 OS=Homo sapiens OX=9606 GN=IGHV3-35 PE=1 SV=1	A0A0C4DH35	N	73	73	K.GLEWVSGVSWnGSRTHYADSVK.G	HexNAc(5)Hex(5)Fuc(1)NeuAc(1)	Uncertain			SA	b	4696.9716	NGlycan/2262.8143	0	b_hIgA-SA-GLTrFASP-FZpipHILIC_E1_step.raw_20240829_noglyc_spec_cut	268.07	0.48	359000000	2	38.62	4	11	63	84	0.48	141.3	12.8	1175.2502	1175.25	-1.98	0	4696.98	3	5.85e+06	38.62	3-14411	HexNAc(5)Hex(5)Fuc(1)NeuAc(1)
49.2.2	16460	39.4200	14419	sp|A0A0C4DH35|HV335_HUMAN Probable non-functional immunoglobulin heavy variable 3-35 OS=Homo sapiens OX=9606 GN=IGHV3-35 PE=1 SV=1	A0A0C4DH35	N	73	73	K.GLEWVSGVSWnGSRTHYADSVK.G	HexNAc(5)Hex(5)Fuc(1)NeuAc(1)	Uncertain			SA	b	4696.9691	NGlycan/2262.8143	0	b_hIgA-SA-GLTrFASP-FZpipHILIC_E1_step.raw_20240829_noglyc_spec_cut	192.78	0.86	359000000	2	38.62	4	11	63	84	0.86	60.5	3.0	1175.2496	1175.25	-2.50	0	4696.98	3	5.85e+06	38.62	3-14419	HexNAc(5)Hex(5)Fuc(1)NeuAc(1)
49.2.3	16471	39.6500	14506	sp|A0A0C4DH35|HV335_HUMAN Probable non-functional immunoglobulin heavy variable 3-35 OS=Homo sapiens OX=9606 GN=IGHV3-35 PE=1 SV=1	A0A0C4DH35	N	73	73	K.GLEWVSGVSWnGSRTHYADSVK.G	HexNAc(5)Hex(5)Fuc(1)NeuAc(1)	Uncertain			SA	b	4696.9695	NGlycan/2262.8143	0	b_hIgA-SA-GLTrFASP-FZpipHILIC_E1_step.raw_20240829_noglyc_spec_cut	228.52	0.65	359000000	2	38.62	4	11	63	84	0.65	116.8	3.1	1175.2497	1175.25	-2.42	0	4696.98	3	5.85e+06	38.62	3-14506	HexNAc(5)Hex(5)Fuc(1)NeuAc(1)
49.2.4	16484	39.9400	14619	sp|A0A0C4DH35|HV335_HUMAN Probable non-functional immunoglobulin heavy variable 3-35 OS=Homo sapiens OX=9606 GN=IGHV3-35 PE=1 SV=1	A0A0C4DH35	N	73	73	K.GLEWVSGVSWnGSRTHYADSVK.G	HexNAc(5)Hex(5)Fuc(1)NeuAc(1)	Uncertain			SA	b	4696.9725	NGlycan/2262.8143	0	b_hIgA-SA-GLTrFASP-FZpipHILIC_E1_step.raw_20240829_noglyc_spec_cut	131.48	0.97	359000000	2	38.62	4	11	63	84	0.97	90.3	12.9	1175.2504	1175.25	-1.78	0	4696.98	3	5.85e+06	38.62	3-14619	HexNAc(5)Hex(5)Fuc(1)NeuAc(1)
49.2.5	16488	40.0200	14653	sp|A0A0C4DH35|HV335_HUMAN Probable non-functional immunoglobulin heavy variable 3-35 OS=Homo sapiens OX=9606 GN=IGHV3-35 PE=1 SV=1	A0A0C4DH35	N	73	73	K.GLEWVSGVSWnGSRTHYADSVK.G	HexNAc(5)Hex(5)Fuc(1)NeuAc(1)	Uncertain			SA	b	4696.9726	NGlycan/2262.8143	0	b_hIgA-SA-GLTrFASP-FZpipHILIC_E1_step.raw_20240829_noglyc_spec_cut	108.31	1	359000000	2	38.62	4	11	63	84	1	13.1	13.0	1175.2504	1175.25	-1.76	0	4696.98	3	5.85e+06	38.62	3-14653	HexNAc(5)Hex(5)Fuc(1)NeuAc(1)
49.2.6	16728	42.8000	15741	sp|A0A0C4DH35|HV335_HUMAN Probable non-functional immunoglobulin heavy variable 3-35 OS=Homo sapiens OX=9606 GN=IGHV3-35 PE=1 SV=1	A0A0C4DH35	N	73	73	K.GLEWVSGVSWnGSRTHYADSVK.G	HexNAc(5)Hex(5)Fuc(1)NeuAc(1)	Uncertain			SA	b	4696.9714	NGlycan/2262.8143	0	b_hIgA-SA-GLTrFASP-FZpipHILIC_E1_step.raw_20240829_noglyc_spec_cut	150.99	1	359000000	2	38.62	4	11	63	84	1	61.4	4.7	1175.2501	1175.25	-2.03	0	4696.98	3	5.85e+06	38.62	3-15741	HexNAc(5)Hex(5)Fuc(1)NeuAc(1)
49.3	31428	37.6500	13368	sp|A0A0C4DH35|HV335_HUMAN Probable non-functional immunoglobulin heavy variable 3-35 OS=Homo sapiens OX=9606 GN=IGHV3-35 PE=1 SV=1	A0A0C4DH35	N	73	73	K.GLEWVSGVSWnGSRTHYADSVK.G	HexNAc(5)Hex(5)Fuc(1)NeuAc(1)	Uncertain			SA	c	4696.9702	NGlycan/2262.8143	1	c_hIgA-SA-GLTrFASP-FZpipHILIC_D_step.raw_20240829_noglyc_spec_cut	175.61	0.37	739000000	2	37.43	4	11	63	84	0.37	154.1	6.6	1175.2498	1175.25	-2.28	0	4696.98	5	7.35e+07	37.43	5-13368	HexNAc(5)Hex(5)Fuc(1)NeuAc(1)
49.4	36197; 36199; 36284; 36290; 36300; 36307	36.3800; 36.4100; 39.1900; 39.3200; 39.5100; 39.5700	13397; 13407; 14504; 14557; 14629; 14653	sp|A0A0C4DH35|HV335_HUMAN Probable non-functional immunoglobulin heavy variable 3-35 OS=Homo sapiens OX=9606 GN=IGHV3-35 PE=1 SV=1	A0A0C4DH35	N	73	73	K.GLEWVSGVSWnGSRTHYADSVK.G	HexNAc(5)Hex(5)Fuc(1)NeuAc(1)	Uncertain			SA	c	4696.9749; 4696.9765; 4696.9739; 4696.9735; 4696.9726; 4696.9716	NGlycan/2262.8143	1	c_hIgA-SA-GLTrFASP-FZpipHILIC_E1_step.raw_20240829_noglyc_spec_cut	332.75	3.61e-01 - 9.99e-01	5110000000	2	37.34	4	11	63	84	3.61e-01 - 9.99e-01	15.6 - 127.5	6.8 - 32.0	1175.2510; 1175.2514; 1175.2508; 1175.2506; 1175.2504; 1175.2502	1175.25	-1.27; -0.94; -1.48; -1.57; -1.77; -1.98	-1 - 0	4696.98	6	5.98e+08	37.34	6-13397	HexNAc(5)Hex(5)Fuc(1)NeuAc(1)
49.4.2	36199	36.4100	13407	sp|A0A0C4DH35|HV335_HUMAN Probable non-functional immunoglobulin heavy variable 3-35 OS=Homo sapiens OX=9606 GN=IGHV3-35 PE=1 SV=1	A0A0C4DH35	N	73	73	K.GLEWVSGVSWnGSRTHYADSVK.G	HexNAc(5)Hex(5)Fuc(1)NeuAc(1)	Uncertain			SA	c	4696.9765	NGlycan/2262.8143	0	c_hIgA-SA-GLTrFASP-FZpipHILIC_E1_step.raw_20240829_noglyc_spec_cut	332.75	0.36	5110000000	2	37.34	4	11	63	84	0.36	127.5	24.4	1175.2514	1175.25	-0.94	0	4696.98	6	5.98e+08	37.34	6-13407	HexNAc(5)Hex(5)Fuc(1)NeuAc(1)
49.4.3	36284	39.1900	14504	sp|A0A0C4DH35|HV335_HUMAN Probable non-functional immunoglobulin heavy variable 3-35 OS=Homo sapiens OX=9606 GN=IGHV3-35 PE=1 SV=1	A0A0C4DH35	N	73	73	K.GLEWVSGVSWnGSRTHYADSVK.G	HexNAc(5)Hex(5)Fuc(1)NeuAc(1)	Uncertain			SA	c	4696.9739	NGlycan/2262.8143	0	c_hIgA-SA-GLTrFASP-FZpipHILIC_E1_step.raw_20240829_noglyc_spec_cut	159.48	1	5110000000	2	37.34	4	11	63	84	1	43.6	6.8	1175.2508	1175.25	-1.48	-1	4696.98	6	5.98e+08	37.34	6-14504	HexNAc(5)Hex(5)Fuc(1)NeuAc(1)
49.4.4	36290	39.3200	14557	sp|A0A0C4DH35|HV335_HUMAN Probable non-functional immunoglobulin heavy variable 3-35 OS=Homo sapiens OX=9606 GN=IGHV3-35 PE=1 SV=1	A0A0C4DH35	N	73	73	K.GLEWVSGVSWnGSRTHYADSVK.G	HexNAc(5)Hex(5)Fuc(1)NeuAc(1)	Uncertain			SA	c	4696.9735	NGlycan/2262.8143	0	c_hIgA-SA-GLTrFASP-FZpipHILIC_E1_step.raw_20240829_noglyc_spec_cut	121.3	1	5110000000	2	37.34	4	11	63	84	1	15.6	9.6	1175.2506	1175.25	-1.57	-1	4696.98	6	5.98e+08	37.34	6-14557	HexNAc(5)Hex(5)Fuc(1)NeuAc(1)
49.4.5	36300	39.5100	14629	sp|A0A0C4DH35|HV335_HUMAN Probable non-functional immunoglobulin heavy variable 3-35 OS=Homo sapiens OX=9606 GN=IGHV3-35 PE=1 SV=1	A0A0C4DH35	N	73	73	K.GLEWVSGVSWnGSRTHYADSVK.G	HexNAc(5)Hex(5)Fuc(1)NeuAc(1)	Uncertain			SA	c	4696.9726	NGlycan/2262.8143	0	c_hIgA-SA-GLTrFASP-FZpipHILIC_E1_step.raw_20240829_noglyc_spec_cut	167.45	0.97	5110000000	2	37.34	4	11	63	84	0.97	81.9	32.0	1175.2504	1175.25	-1.77	0	4696.98	6	5.98e+08	37.34	6-14629	HexNAc(5)Hex(5)Fuc(1)NeuAc(1)
49.4.6	36307	39.5700	14653	sp|A0A0C4DH35|HV335_HUMAN Probable non-functional immunoglobulin heavy variable 3-35 OS=Homo sapiens OX=9606 GN=IGHV3-35 PE=1 SV=1	A0A0C4DH35	N	73	73	K.GLEWVSGVSWnGSRTHYADSVK.G	HexNAc(5)Hex(5)Fuc(1)NeuAc(1)	Uncertain			SA	c	4696.9716	NGlycan/2262.8143	0	c_hIgA-SA-GLTrFASP-FZpipHILIC_E1_step.raw_20240829_noglyc_spec_cut	215.85	0.98	5110000000	2	37.34	4	11	63	84	0.98	78.0	20.7	1175.2502	1175.25	-1.98	0	4696.98	6	5.98e+08	37.34	6-14653	HexNAc(5)Hex(5)Fuc(1)NeuAc(1)
49.5	51086	37.5500	13210	sp|A0A0C4DH35|HV335_HUMAN Probable non-functional immunoglobulin heavy variable 3-35 OS=Homo sapiens OX=9606 GN=IGHV3-35 PE=1 SV=1	A0A0C4DH35	N	73	73	K.GLEWVSGVSWnGSRTHYADSVK.G	HexNAc(5)Hex(5)Fuc(1)NeuAc(1)	Uncertain			SA	d	4696.9673	NGlycan/2262.8143	1	d_hIgA-SA-GLTrFASP-FZpipHILIC_D_step.raw_20240829_noglyc_spec_cut	189.76	0.064	550000000	2	37.32	4	11	63	84	0.45	81.4	3.1	1175.2491	1175.25	-2.90	0	4696.98	8	7.84e+07	37.32	8-13210	HexNAc(5)Hex(5)Fuc(1)NeuAc(1)
49.6	55793; 55843; 55862; 55867; 55877	36.3900; 38.4500; 39.3500; 39.4700; 39.7100	13430; 14242; 14598; 14645; 14737	sp|A0A0C4DH35|HV335_HUMAN Probable non-functional immunoglobulin heavy variable 3-35 OS=Homo sapiens OX=9606 GN=IGHV3-35 PE=1 SV=1	A0A0C4DH35	N	73	73	K.GLEWVSGVSWnGSRTHYADSVK.G	HexNAc(5)Hex(5)Fuc(1)NeuAc(1)	Uncertain			SA	d	4696.9671; 4696.9738; 4696.9700; 4696.9722; 4696.9715	NGlycan/2262.8143	1	d_hIgA-SA-GLTrFASP-FZpipHILIC_E1_step.raw_20240829_noglyc_spec_cut	217.56	9.46e-01 - 9.92e-01	3240000000	2	37.40	4	11	63	84	9.46e-01 - 9.92e-01	38.3 - 113.7	1.1 - 14.1	1175.2490; 1175.2507; 1175.2498; 1175.2503; 1175.2502	1175.25	-2.94; -1.51; -2.33; -1.84; -1.99	-1 - 0	4696.98	9	2.45e+08	37.40	9-13430	HexNAc(5)Hex(5)Fuc(1)NeuAc(1)
49.6.2	55843	38.4500	14242	sp|A0A0C4DH35|HV335_HUMAN Probable non-functional immunoglobulin heavy variable 3-35 OS=Homo sapiens OX=9606 GN=IGHV3-35 PE=1 SV=1	A0A0C4DH35	N	73	73	K.GLEWVSGVSWnGSRTHYADSVK.G	HexNAc(5)Hex(5)Fuc(1)NeuAc(1)	Uncertain			SA	d	4696.9738	NGlycan/2262.8143	0	d_hIgA-SA-GLTrFASP-FZpipHILIC_E1_step.raw_20240829_noglyc_spec_cut	217.56	0.95	3240000000	2	37.40	4	11	63	84	0.95	113.7	14.1	1175.2507	1175.25	-1.51	0	4696.98	9	2.45e+08	37.40	9-14242	HexNAc(5)Hex(5)Fuc(1)NeuAc(1)
49.6.3	55862	39.3500	14598	sp|A0A0C4DH35|HV335_HUMAN Probable non-functional immunoglobulin heavy variable 3-35 OS=Homo sapiens OX=9606 GN=IGHV3-35 PE=1 SV=1	A0A0C4DH35	N	73	73	K.GLEWVSGVSWnGSRTHYADSVK.G	HexNAc(5)Hex(5)Fuc(1)NeuAc(1)	Uncertain			SA	d	4696.9700	NGlycan/2262.8143	0	d_hIgA-SA-GLTrFASP-FZpipHILIC_E1_step.raw_20240829_noglyc_spec_cut	199.75	0.95	3240000000	2	37.40	4	11	63	84	0.95	84.6	4.7	1175.2498	1175.25	-2.33	0	4696.98	9	2.45e+08	37.40	9-14598	HexNAc(5)Hex(5)Fuc(1)NeuAc(1)
49.6.4	55867	39.4700	14645	sp|A0A0C4DH35|HV335_HUMAN Probable non-functional immunoglobulin heavy variable 3-35 OS=Homo sapiens OX=9606 GN=IGHV3-35 PE=1 SV=1	A0A0C4DH35	N	73	73	K.GLEWVSGVSWnGSRTHYADSVK.G	HexNAc(5)Hex(5)Fuc(1)NeuAc(1)	Uncertain			SA	d	4696.9722	NGlycan/2262.8143	0	d_hIgA-SA-GLTrFASP-FZpipHILIC_E1_step.raw_20240829_noglyc_spec_cut	167.22	0.96	3240000000	2	37.40	4	11	63	84	0.96	96.7	12.5	1175.2503	1175.25	-1.84	0	4696.98	9	2.45e+08	37.40	9-14645	HexNAc(5)Hex(5)Fuc(1)NeuAc(1)
49.6.5	55877	39.7100	14737	sp|A0A0C4DH35|HV335_HUMAN Probable non-functional immunoglobulin heavy variable 3-35 OS=Homo sapiens OX=9606 GN=IGHV3-35 PE=1 SV=1	A0A0C4DH35	N	73	73	K.GLEWVSGVSWnGSRTHYADSVK.G	HexNAc(5)Hex(5)Fuc(1)NeuAc(1)	Uncertain			SA	d	4696.9715	NGlycan/2262.8143	0	d_hIgA-SA-GLTrFASP-FZpipHILIC_E1_step.raw_20240829_noglyc_spec_cut	164.65	0.98	3240000000	2	37.40	4	11	63	84	0.98	96.6	1.1	1175.2502	1175.25	-1.99	-1	4696.98	9	2.45e+08	37.40	9-14737	HexNAc(5)Hex(5)Fuc(1)NeuAc(1)
49.7	74848; 74889; 74890; 74894; 74897; 74914; 74920; 74926; 74931; 74935; 74939	36.3900; 37.9000; 37.9200; 38.0400; 38.2800; 39.1300; 39.2000; 39.4100; 39.5100; 39.6200; 39.7000	12363; 12957; 12965; 13012; 13109; 13443; 13471; 13554; 13592; 13634; 13665	sp|A0A0C4DH35|HV335_HUMAN Probable non-functional immunoglobulin heavy variable 3-35 OS=Homo sapiens OX=9606 GN=IGHV3-35 PE=1 SV=1	A0A0C4DH35	N	73	73	K.GLEWVSGVSWnGSRTHYADSVK.G	HexNAc(5)Hex(5)Fuc(1)NeuAc(1)	Uncertain			SA	a	4696.9683; 4696.9677; 4696.9640; 4696.9717; 4696.9620; 4696.9710; 4696.9705; 4696.9670; 4696.9738; 4696.9708; 4696.9719	NGlycan/2262.8143	1	a_hIgA-SA-GLTrFASP-FZpipHILIC_E1_step.raw_20240829_noglyc_spec_cut	300.97	2.05e-01 - 1.00e+00	4890000000	2	37.34	4	11	63	84	2.05e-01 - 1.00e+00	11.6 - 245.4	2.8 - 20.0	1175.2493; 1175.2492; 1175.2483; 1175.2502; 1175.2478; 1175.2500; 1175.2499; 1175.2490; 1175.2507; 1175.2500; 1175.2502	1175.25	-2.69; -2.80; -3.59; -1.96; -4.02; -2.11; -2.21; -2.96; -1.51; -2.14; -1.92	-1 - 1	4696.98	12	4.31e+08	37.34	12-12363	HexNAc(5)Hex(5)Fuc(1)NeuAc(1)
49.7.2	74889	37.9000	12957	sp|A0A0C4DH35|HV335_HUMAN Probable non-functional immunoglobulin heavy variable 3-35 OS=Homo sapiens OX=9606 GN=IGHV3-35 PE=1 SV=1	A0A0C4DH35	N	73	73	K.GLEWVSGVSWnGSRTHYADSVK.G	HexNAc(5)Hex(5)Fuc(1)NeuAc(1)	Uncertain			SA	a	4696.9677	NGlycan/2262.8143	0	a_hIgA-SA-GLTrFASP-FZpipHILIC_E1_step.raw_20240829_noglyc_spec_cut	124.71	0.9	4890000000	2	37.34	4	11	63	84	0.9	101.3	8.1	1175.2492	1175.25	-2.80	0	4696.98	12	4.31e+08	37.34	12-12957	HexNAc(5)Hex(5)Fuc(1)NeuAc(1)
49.7.3	74894	38.0400	13012	sp|A0A0C4DH35|HV335_HUMAN Probable non-functional immunoglobulin heavy variable 3-35 OS=Homo sapiens OX=9606 GN=IGHV3-35 PE=1 SV=1	A0A0C4DH35	N	73	73	K.GLEWVSGVSWnGSRTHYADSVK.G	HexNAc(5)Hex(5)Fuc(1)NeuAc(1)	Uncertain			SA	a	4696.9717	NGlycan/2262.8143	0	a_hIgA-SA-GLTrFASP-FZpipHILIC_E1_step.raw_20240829_noglyc_spec_cut	186.35	1	4890000000	2	37.34	4	11	63	84	1	38.9	11.7	1175.2502	1175.25	-1.96	-1	4696.98	12	4.31e+08	37.34	12-13012	HexNAc(5)Hex(5)Fuc(1)NeuAc(1)
49.7.4	74897	38.2800	13109	sp|A0A0C4DH35|HV335_HUMAN Probable non-functional immunoglobulin heavy variable 3-35 OS=Homo sapiens OX=9606 GN=IGHV3-35 PE=1 SV=1	A0A0C4DH35	N	73	73	K.GLEWVSGVSWnGSRTHYADSVK.G	HexNAc(5)Hex(5)Fuc(1)NeuAc(1)	Uncertain			SA	a	4696.9620	NGlycan/2262.8143	0	a_hIgA-SA-GLTrFASP-FZpipHILIC_E1_step.raw_20240829_noglyc_spec_cut	300.97	0.21	4890000000	2	37.34	4	11	63	84	0.21	245.4	2.8	1175.2478	1175.25	-4.02	0	4696.98	12	4.31e+08	37.34	12-13109	HexNAc(5)Hex(5)Fuc(1)NeuAc(1)
49.7.5	74914	39.1300	13443	sp|A0A0C4DH35|HV335_HUMAN Probable non-functional immunoglobulin heavy variable 3-35 OS=Homo sapiens OX=9606 GN=IGHV3-35 PE=1 SV=1	A0A0C4DH35	N	73	73	K.GLEWVSGVSWnGSRTHYADSVK.G	HexNAc(5)Hex(5)Fuc(1)NeuAc(1)	Uncertain			SA	a	4696.9710	NGlycan/2262.8143	0	a_hIgA-SA-GLTrFASP-FZpipHILIC_E1_step.raw_20240829_noglyc_spec_cut	163.22	0.94	4890000000	2	37.34	4	11	63	84	0.94	112.8	10.2	1175.2500	1175.25	-2.11	-1	4696.98	12	4.31e+08	37.34	12-13443	HexNAc(5)Hex(5)Fuc(1)NeuAc(1)
49.7.6	74920	39.2000	13471	sp|A0A0C4DH35|HV335_HUMAN Probable non-functional immunoglobulin heavy variable 3-35 OS=Homo sapiens OX=9606 GN=IGHV3-35 PE=1 SV=1	A0A0C4DH35	N	73	73	K.GLEWVSGVSWnGSRTHYADSVK.G	HexNAc(5)Hex(5)Fuc(1)NeuAc(1)	Uncertain			SA	a	4696.9705	NGlycan/2262.8143	0	a_hIgA-SA-GLTrFASP-FZpipHILIC_E1_step.raw_20240829_noglyc_spec_cut	181.22	0.99	4890000000	2	37.34	4	11	63	84	0.99	59.0	10.8	1175.2499	1175.25	-2.21	0	4696.98	12	4.31e+08	37.34	12-13471	HexNAc(5)Hex(5)Fuc(1)NeuAc(1)
49.7.7	74926	39.4100	13554	sp|A0A0C4DH35|HV335_HUMAN Probable non-functional immunoglobulin heavy variable 3-35 OS=Homo sapiens OX=9606 GN=IGHV3-35 PE=1 SV=1	A0A0C4DH35	N	73	73	K.GLEWVSGVSWnGSRTHYADSVK.G	HexNAc(5)Hex(5)Fuc(1)NeuAc(1)	Uncertain			SA	a	4696.9670	NGlycan/2262.8143	0	a_hIgA-SA-GLTrFASP-FZpipHILIC_E1_step.raw_20240829_noglyc_spec_cut	221.66	0.71	4890000000	2	37.34	4	11	63	84	0.71	127.9	7.3	1175.2490	1175.25	-2.96	0	4696.98	12	4.31e+08	37.34	12-13554	HexNAc(5)Hex(5)Fuc(1)NeuAc(1)
49.7.8	74931	39.5100	13592	sp|A0A0C4DH35|HV335_HUMAN Probable non-functional immunoglobulin heavy variable 3-35 OS=Homo sapiens OX=9606 GN=IGHV3-35 PE=1 SV=1	A0A0C4DH35	N	73	73	K.GLEWVSGVSWnGSRTHYADSVK.G	HexNAc(5)Hex(5)Fuc(1)NeuAc(1)	Uncertain			SA	a	4696.9738	NGlycan/2262.8143	0	a_hIgA-SA-GLTrFASP-FZpipHILIC_E1_step.raw_20240829_noglyc_spec_cut	136.37	0.99	4890000000	2	37.34	4	11	63	84	0.99	62.0	14.1	1175.2507	1175.25	-1.51	0	4696.98	12	4.31e+08	37.34	12-13592	HexNAc(5)Hex(5)Fuc(1)NeuAc(1)
49.7.9	74935	39.6200	13634	sp|A0A0C4DH35|HV335_HUMAN Probable non-functional immunoglobulin heavy variable 3-35 OS=Homo sapiens OX=9606 GN=IGHV3-35 PE=1 SV=1	A0A0C4DH35	N	73	73	K.GLEWVSGVSWnGSRTHYADSVK.G	HexNAc(5)Hex(5)Fuc(1)NeuAc(1)	Uncertain			SA	a	4696.9708	NGlycan/2262.8143	0	a_hIgA-SA-GLTrFASP-FZpipHILIC_E1_step.raw_20240829_noglyc_spec_cut	154.77	0.86	4890000000	2	37.34	4	11	63	84	0.86	98.8	11.2	1175.2500	1175.25	-2.14	0	4696.98	12	4.31e+08	37.34	12-13634	HexNAc(5)Hex(5)Fuc(1)NeuAc(1)
49.7.10	74939	39.7000	13665	sp|A0A0C4DH35|HV335_HUMAN Probable non-functional immunoglobulin heavy variable 3-35 OS=Homo sapiens OX=9606 GN=IGHV3-35 PE=1 SV=1	A0A0C4DH35	N	73	73	K.GLEWVSGVSWnGSRTHYADSVK.G	HexNAc(5)Hex(5)Fuc(1)NeuAc(1)	Uncertain			SA	a	4696.9719	NGlycan/2262.8143	0	a_hIgA-SA-GLTrFASP-FZpipHILIC_E1_step.raw_20240829_noglyc_spec_cut	221.2	0.46	4890000000	2	37.34	4	11	63	84	0.46	178.6	20.0	1175.2502	1175.25	-1.92	1	4696.98	12	4.31e+08	37.34	12-13665	HexNAc(5)Hex(5)Fuc(1)NeuAc(1)
49.8	81797	37.3000	11716	sp|A0A0C4DH35|HV335_HUMAN Probable non-functional immunoglobulin heavy variable 3-35 OS=Homo sapiens OX=9606 GN=IGHV3-35 PE=1 SV=1	A0A0C4DH35	N	73	73	K.GLEWVSGVSWnGSRTHYADSVK.G	HexNAc(5)Hex(5)Fuc(1)NeuAc(1)	Uncertain			AR	d	4696.9704	NGlycan/2262.8143	1	d_hIgA-AR-GLTrFASP-FZpipHILIC_217mAbs-Dil1-5_D_step.raw_20240829_noglyc_spec_cut	159.68	0.86	17100000	2	37.28	4	11	63	84	0.86	15.6	15.6	1175.2499	1175.25	-2.23	0	4696.98	13	1.8e+06	37.28	13-11716	HexNAc(5)Hex(5)Fuc(1)NeuAc(1)
50	31423; 81795; 115044; 115045; 130620; 141933	37.4200; 37.0500; 36.8200; 36.8300; 36.7500; 32.2800	13277; 11620; 11464; 11470; 11489; 10095	sp|A0A0C4DH35|HV335_HUMAN Probable non-functional immunoglobulin heavy variable 3-35 OS=Homo sapiens OX=9606 GN=IGHV3-35 PE=1 SV=1	A0A0C4DH35	N	73	73	K.GLEWVSGVSWnGSRTHYADSVK.G	HexNAc(5)Hex(6)NeuAc(1)	Uncertain			SA	c	4712.9946; 4712.9861; 4712.9899; 4712.9972; 4712.9929; 4712.9661	NGlycan/2278.8092	2	c_hIgA-SA-GLTrFASP-FZpipHILIC_D_step.raw_20240829_noglyc_spec_cut; d_hIgA-AR-GLTrFASP-FZpipHILIC_217mAbs-Dil1-5_D_step.raw_20240829_noglyc_spec_cut; b_hIgA-AR-GLTrFASP-FZpipHILIC_214mAbs-Dil1-5_D_step.raw_20240829_noglyc_spec_cut; c_hIgA-AR-GLTrFASP-FZpipHILIC_209mAbs-Dil1-5_D_step.raw_20240829_noglyc_spec_cut; d_hIgA-AR-GLTrFASP-FZpipHILIC_35mAbs_E1_step.raw_20240829_noglyc_spec_cut	135.76	5.93e-01 - 9.43e-01		2	32.24 - 37.40	4	11	63	84	5.93e-01 - 9.73e-01	21.1 - 92.9	19.5 - 30.8	1179.2559; 1179.2538; 1179.2548; 1179.2566; 1179.2555; 1179.2488	1179.25	3.99; 2.18; 3.00; 4.54; 3.63; -2.05	0 - 1	4712.98	5; 13; 19; 22; 24	1.748e+06 - 1.475e+07	32.24 - 37.40	5; 13; 19; 22; 24-13277	HexNAc(5)Hex(6)NeuAc(1)
50.1	31423	37.4200	13277	sp|A0A0C4DH35|HV335_HUMAN Probable non-functional immunoglobulin heavy variable 3-35 OS=Homo sapiens OX=9606 GN=IGHV3-35 PE=1 SV=1	A0A0C4DH35	N	73	73	K.GLEWVSGVSWnGSRTHYADSVK.G	HexNAc(5)Hex(6)NeuAc(1)	Uncertain			SA	c	4712.9946	NGlycan/2278.8092	1	c_hIgA-SA-GLTrFASP-FZpipHILIC_D_step.raw_20240829_noglyc_spec_cut	135.76	0.59	13900000	2	37.40	4	11	63	84	0.59	92.9	30.8	1179.2559	1179.25	3.99	1	4712.98	5	1.75e+06	37.40	5-13277	HexNAc(5)Hex(6)NeuAc(1)
50.2	81795	37.0500	11620	sp|A0A0C4DH35|HV335_HUMAN Probable non-functional immunoglobulin heavy variable 3-35 OS=Homo sapiens OX=9606 GN=IGHV3-35 PE=1 SV=1	A0A0C4DH35	N	73	73	K.GLEWVSGVSWnGSRTHYADSVK.G	HexNAc(5)Hex(6)NeuAc(1)	Uncertain			AR	d	4712.9861	NGlycan/2278.8092	1	d_hIgA-AR-GLTrFASP-FZpipHILIC_217mAbs-Dil1-5_D_step.raw_20240829_noglyc_spec_cut	113.25	0.81	61900000	2	36.80	4	11	63	84	0.81	46.0	20.9	1179.2538	1179.25	2.18	1	4712.98	13	6.74e+06	36.80	13-11620	HexNAc(5)Hex(6)NeuAc(1)
51	16647	41.8500	15369	sp|A0A0C4DH35|HV335_HUMAN Probable non-functional immunoglobulin heavy variable 3-35 OS=Homo sapiens OX=9606 GN=IGHV3-35 PE=1 SV=1	A0A0C4DH35	N	73	73	K.GLEWVSGVSWnGSRTHYADSVK.G	HexNAc(6)Hex(7)NeuAc(2)	Uncertain			SA	b	5369.2168	NGlycan/2935.0368	1	b_hIgA-SA-GLTrFASP-FZpipHILIC_E1_step.raw_20240829_noglyc_spec_cut	149.33	0.98	38300000	3	41.86	4	11	63	84	0.98	75.5	2.4	1343.3115	1343.31	2.50	1	5369.2	3	3.52e+06	41.86	3-15369	HexNAc(6)Hex(7)NeuAc(2)
52	4061; 130685; 142220	43.0100; 41.5300; 41.5800	13859; 13314; 13717	sp|A0A0C4DH35|HV335_HUMAN Probable non-functional immunoglobulin heavy variable 3-35 OS=Homo sapiens OX=9606 GN=IGHV3-35 PE=1 SV=1	A0A0C4DH35	W,W,N	66,72,73	73	K.GLEwVSGVSwnGSRTHYADSVK.G	HexNAc(5)Hex(5)NeuAc(2)	Uncertain			SA	a	4890.0040; 4890.0061; 4889.9962	Dioxidation/31.9898; Oxidation/15.9949; NGlycan/2407.8518	2	a_hIgA-SA-GLTrFASP-FZpipHILIC_E2_step.raw_20240829_noglyc_spec_cut; c_hIgA-AR-GLTrFASP-FZpipHILIC_209mAbs-Dil1-5_D_step.raw_20240829_noglyc_spec_cut; d_hIgA-AR-GLTrFASP-FZpipHILIC_35mAbs_E1_step.raw_20240829_noglyc_spec_cut	118.5	9.47e-01 - 1.00e+00		2	41.52 - 43.11	4	4,10,11	63	84	9.47e-01 - 1.00e+00	11.0 - 29.3	0.0 - 11.3	1223.5083; 1223.5088; 1223.5063	1223.51	0.19; 0.61; -1.41	-1	4890	1; 22; 24	2.008e+06 - 2.220e+06	41.52 - 43.11	1; 22; 24-13859	HexNAc(5)Hex(5)NeuAc(2)
52.1	142220	41.5800	13717	sp|A0A0C4DH35|HV335_HUMAN Probable non-functional immunoglobulin heavy variable 3-35 OS=Homo sapiens OX=9606 GN=IGHV3-35 PE=1 SV=1	A0A0C4DH35	W,W,N	66,72,73	73	K.GLEwVSGVSwnGSRTHYADSVK.G	HexNAc(5)Hex(5)NeuAc(2)	Uncertain			AR	d	4889.9962	Dioxidation/31.9898; Oxidation/15.9949; NGlycan/2407.8518	1	d_hIgA-AR-GLTrFASP-FZpipHILIC_35mAbs_E1_step.raw_20240829_noglyc_spec_cut	118.5	0.95	27900000	2	41.71	4	4,10,11	63	84	0.95	11.3	11.3	1223.5063	1223.51	-1.41	-1	4890	24	2.01e+06	41.71	24-13717	HexNAc(5)Hex(5)NeuAc(2)
53	36533; 75135	42.2400	15698; 14659	sp|A0A0C4DH35|HV335_HUMAN Probable non-functional immunoglobulin heavy variable 3-35 OS=Homo sapiens OX=9606 GN=IGHV3-35 PE=1 SV=1	A0A0C4DH35	W,W,N	66,72,73	73	K.GLEwVSGVSwnGSRTHYADSVK.G	HexNAc(4)Hex(5)NeuAc(2)	Uncertain			SA	c	4686.9194; 4686.9230	Oxidation/15.9949; Dioxidation/31.9898; NGlycan/2204.7724	2	c_hIgA-SA-GLTrFASP-FZpipHILIC_E1_step.raw_20240829_noglyc_spec_cut; a_hIgA-SA-GLTrFASP-FZpipHILIC_E1_step.raw_20240829_noglyc_spec_cut	123.36	9.98e-01 - 9.99e-01		2	42.23 - 42.39	4	4,10,11	63	84	9.98e-01 - 9.99e-01	26.3 - 41.9	0.0 - 0.0	1172.7371; 1172.7380	1172.74	-0.93; -0.16	-1	4686.92	6; 12	1.870e+06 - 2.584e+06	42.23 - 42.39	6; 12-15698	HexNAc(4)Hex(5)NeuAc(2)
53.1	36533	42.2400	15698	sp|A0A0C4DH35|HV335_HUMAN Probable non-functional immunoglobulin heavy variable 3-35 OS=Homo sapiens OX=9606 GN=IGHV3-35 PE=1 SV=1	A0A0C4DH35	W,W,N	66,72,73	73	K.GLEwVSGVSwnGSRTHYADSVK.G	HexNAc(4)Hex(5)NeuAc(2)	Uncertain			SA	c	4686.9194	Oxidation/15.9949; Dioxidation/31.9898; NGlycan/2204.7724	1	c_hIgA-SA-GLTrFASP-FZpipHILIC_E1_step.raw_20240829_noglyc_spec_cut	105.65	1	25600000	2	42.39	4	4,10,11	63	84	1	41.9	0.0	1172.7371	1172.74	-0.93	-1	4686.92	6	2.58e+06	42.39	6-15698	HexNAc(4)Hex(5)NeuAc(2)
53.2	75135	42.2400	14659	sp|A0A0C4DH35|HV335_HUMAN Probable non-functional immunoglobulin heavy variable 3-35 OS=Homo sapiens OX=9606 GN=IGHV3-35 PE=1 SV=1	A0A0C4DH35	W,W,N	66,72,73	73	K.GLEwVSGVSwnGSRTHYADSVK.G	HexNAc(4)Hex(5)NeuAc(2)	Uncertain			SA	a	4686.9230	Oxidation/15.9949; Dioxidation/31.9898; NGlycan/2204.7724	1	a_hIgA-SA-GLTrFASP-FZpipHILIC_E1_step.raw_20240829_noglyc_spec_cut	123.36	1	21800000	2	42.23	4	4,10,11	63	84	1	26.3	0.0	1172.7380	1172.74	-0.16	-1	4686.92	12	1.87e+06	42.23	12-14659	HexNAc(4)Hex(5)NeuAc(2)
54	11821; 56047; 75142; 81839; 98163	43.1200; 42.2400; 42.3200; 41.5100; 41.4600	15646; 15723; 14693; 13324; 13161	sp|A0A0C4DH35|HV335_HUMAN Probable non-functional immunoglobulin heavy variable 3-35 OS=Homo sapiens OX=9606 GN=IGHV3-35 PE=1 SV=1	A0A0C4DH35	W,W,N	66,72,73	73	K.GLEwVSGVSwnGSRTHYADSVK.G	HexNAc(5)Hex(5)NeuAc(2)	Uncertain			SA	b	4889.9981; 4890.0062; 4890.0018; 4889.9995; 4889.9940	Oxidation/15.9949; Dioxidation/31.9898; NGlycan/2407.8518	2	b_hIgA-SA-GLTrFASP-FZpipHILIC_D_step.raw_20240829_noglyc_spec_cut; d_hIgA-SA-GLTrFASP-FZpipHILIC_E1_step.raw_20240829_noglyc_spec_cut; a_hIgA-SA-GLTrFASP-FZpipHILIC_E1_step.raw_20240829_noglyc_spec_cut; d_hIgA-AR-GLTrFASP-FZpipHILIC_217mAbs-Dil1-5_D_step.raw_20240829_noglyc_spec_cut; a_hIgA-AR-GLTrFASP-FZpipHILIC_218mAbs-Dil1-5_D_step.raw_20240829_noglyc_spec_cut	135.95	5.86e-01 - 9.99e-01		2	41.47 - 43.08	4	4,10,11	63	84	5.86e-01 - 9.99e-01	8.2 - 41.2	0.0 - 8.2	1223.5068; 1223.5088; 1223.5077; 1223.5072; 1223.5058	1223.51	-1.02; 0.64; -0.28; -0.73; -1.87	-1	4890	2; 9; 12; 13; 16	6.689e+05 - 5.429e+06	41.47 - 43.08	2; 9; 12; 13; 16-15646	HexNAc(5)Hex(5)NeuAc(2)
54.1	11821	43.1200	15646	sp|A0A0C4DH35|HV335_HUMAN Probable non-functional immunoglobulin heavy variable 3-35 OS=Homo sapiens OX=9606 GN=IGHV3-35 PE=1 SV=1	A0A0C4DH35	W,W,N	66,72,73	73	K.GLEwVSGVSwnGSRTHYADSVK.G	HexNAc(5)Hex(5)NeuAc(2)	Uncertain			SA	b	4889.9981	Oxidation/15.9949; Dioxidation/31.9898; NGlycan/2407.8518	1	b_hIgA-SA-GLTrFASP-FZpipHILIC_D_step.raw_20240829_noglyc_spec_cut	135.95	0.98	13900000	2	43.08	4	4,10,11	63	84	0.98	41.2	0.0	1223.5068	1223.51	-1.02	-1	4890	2	1.36e+06	43.08	2-15646	HexNAc(5)Hex(5)NeuAc(2)
55	56050; 75130; 81838; 115085	42.2600; 42.2100; 41.4900; 41.5100	15733; 14645; 13318; 13271	sp|A0A0C4DH35|HV335_HUMAN Probable non-functional immunoglobulin heavy variable 3-35 OS=Homo sapiens OX=9606 GN=IGHV3-35 PE=1 SV=1	A0A0C4DH35	W,W,N	66,72,73	73	K.GLEwVSGVSwnGSRTHYADSVK.G	HexNAc(5)Hex(6)Fuc(1)NeuAc(1)	Uncertain			SA	d	4907.0238; 4907.0321; 4907.0240; 4907.0241	Oxidation/15.9949; Dioxidation/31.9898; NGlycan/2424.8671	2	d_hIgA-SA-GLTrFASP-FZpipHILIC_E1_step.raw_20240829_noglyc_spec_cut; a_hIgA-SA-GLTrFASP-FZpipHILIC_E1_step.raw_20240829_noglyc_spec_cut; d_hIgA-AR-GLTrFASP-FZpipHILIC_217mAbs-Dil1-5_D_step.raw_20240829_noglyc_spec_cut; b_hIgA-AR-GLTrFASP-FZpipHILIC_214mAbs-Dil1-5_D_step.raw_20240829_noglyc_spec_cut	151.62	3.96e-01 - 9.98e-01		2	41.49 - 42.28	4	4,10,11	63	84	3.96e-01 - 9.98e-01	34.9 - 111.8	0.0 - 15.9	1227.7632; 1227.7653; 1227.7633; 1227.7633	1227.76	1.10; 2.79; 1.13; 1.16	-1	4907.02	9; 12; 13; 19	7.913e+05 - 2.574e+06	41.49 - 42.28	9; 12; 13; 19-15733	HexNAc(5)Hex(6)Fuc(1)NeuAc(1)
55.1	56050	42.2600	15733	sp|A0A0C4DH35|HV335_HUMAN Probable non-functional immunoglobulin heavy variable 3-35 OS=Homo sapiens OX=9606 GN=IGHV3-35 PE=1 SV=1	A0A0C4DH35	W,W,N	66,72,73	73	K.GLEwVSGVSwnGSRTHYADSVK.G	HexNAc(5)Hex(6)Fuc(1)NeuAc(1)	Uncertain			SA	d	4907.0238	Oxidation/15.9949; Dioxidation/31.9898; NGlycan/2424.8671	1	d_hIgA-SA-GLTrFASP-FZpipHILIC_E1_step.raw_20240829_noglyc_spec_cut	151.62	0.99	20500000	2	42.28	4	4,10,11	63	84	0.99	34.9	0.0	1227.7632	1227.76	1.10	-1	4907.02	9	2.16e+06	42.28	9-15733	HexNAc(5)Hex(6)Fuc(1)NeuAc(1)
55.2	81838	41.4900	13318	sp|A0A0C4DH35|HV335_HUMAN Probable non-functional immunoglobulin heavy variable 3-35 OS=Homo sapiens OX=9606 GN=IGHV3-35 PE=1 SV=1	A0A0C4DH35	W,W,N	66,72,73	73	K.GLEwVSGVSwnGSRTHYADSVK.G	HexNAc(5)Hex(6)Fuc(1)NeuAc(1)	Uncertain			AR	d	4907.0240	Oxidation/15.9949; Dioxidation/31.9898; NGlycan/2424.8671	1	d_hIgA-AR-GLTrFASP-FZpipHILIC_217mAbs-Dil1-5_D_step.raw_20240829_noglyc_spec_cut	130.86	0.4	9350000	2	41.49	4	4,10,11	63	84	0.4	111.8	0.0	1227.7633	1227.76	1.13	-1	4907.02	13	1.24e+06	41.49	13-13318	HexNAc(5)Hex(6)Fuc(1)NeuAc(1)
55.3	115085	41.5100	13271	sp|A0A0C4DH35|HV335_HUMAN Probable non-functional immunoglobulin heavy variable 3-35 OS=Homo sapiens OX=9606 GN=IGHV3-35 PE=1 SV=1	A0A0C4DH35	W,W,N	66,72,73	73	K.GLEwVSGVSwnGSRTHYADSVK.G	HexNAc(5)Hex(6)Fuc(1)NeuAc(1)	Uncertain			AR	b	4907.0241	Oxidation/15.9949; Dioxidation/31.9898; NGlycan/2424.8671	1	b_hIgA-AR-GLTrFASP-FZpipHILIC_214mAbs-Dil1-5_D_step.raw_20240829_noglyc_spec_cut	112.47	0.56	6460000	2	41.54	4	4,10,11	63	84	0.56	90.8	15.9	1227.7633	1227.76	1.16	-1	4907.02	19	7.91e+05	41.54	19-13271	HexNAc(5)Hex(6)Fuc(1)NeuAc(1)
56	16310; 55822; 74796; 74798	35.1700; 37.3800; 35.1800; 35.2000	12746; 13817; 11890; 11901	sp|A0A0C4DH35|HV335_HUMAN Probable non-functional immunoglobulin heavy variable 3-35 OS=Homo sapiens OX=9606 GN=IGHV3-35 PE=1 SV=1	A0A0C4DH35	W,N	66,73	73	K.GLEwVSGVSWnGSRTHYADSVK.G	HexNAc(4)Hex(5)Fuc(1)NeuAc(2)	True-positive	Replace N-glycan,Low b and y ions	HexNAc(4)Hex(5)Fuc(1)NeuAc(2)	SA	b	4818.0014; 4818.0020; 4818.0026; 4817.9938	Dioxidation/31.9898; NGlycan/2351.8508	2	b_hIgA-SA-GLTrFASP-FZpipHILIC_E1_step.raw_20240829_noglyc_spec_cut; d_hIgA-SA-GLTrFASP-FZpipHILIC_E1_step.raw_20240829_noglyc_spec_cut; a_hIgA-SA-GLTrFASP-FZpipHILIC_E1_step.raw_20240829_noglyc_spec_cut	208.87	8.88e-01 - 1.00e+00		2	35.23 - 37.32	4	4,11	63	84	8.88e-01 - 1.00e+00	2.3 - 100.9	0.0	1205.5076; 1205.5078; 1205.5079; 1205.5057	1205.51	-1.18; -1.07; -0.94; -2.77	-1 - 0	4818.01	3; 9; 12	7.211e+06 - 1.191e+07	35.23 - 37.32	3; 9; 12-12746	HexNAc(4)Hex(5)Fuc(3)NeuAc(1)
56.1	55822	37.3800	13817	sp|A0A0C4DH35|HV335_HUMAN Probable non-functional immunoglobulin heavy variable 3-35 OS=Homo sapiens OX=9606 GN=IGHV3-35 PE=1 SV=1	A0A0C4DH35	W,N	66,73	73	K.GLEwVSGVSWnGSRTHYADSVK.G	HexNAc(4)Hex(5)Fuc(1)NeuAc(2)	True-positive	Replace N-glycan,Low b and y ions	HexNAc(4)Hex(5)Fuc(1)NeuAc(2)	SA	d	4818.0020	Dioxidation/31.9898; NGlycan/2351.8508	1	d_hIgA-SA-GLTrFASP-FZpipHILIC_E1_step.raw_20240829_noglyc_spec_cut	103.75	0.99	105000000	2	37.32	4	4,11	63	84	0.99	11.6	0.0	1205.5078	1205.51	-1.07	0	4818.01	9	1.19e+07	37.32	9-13817	HexNAc(4)Hex(5)Fuc(3)NeuAc(1)
56.2	74796; 74798	35.1800; 35.2000	11890; 11901	sp|A0A0C4DH35|HV335_HUMAN Probable non-functional immunoglobulin heavy variable 3-35 OS=Homo sapiens OX=9606 GN=IGHV3-35 PE=1 SV=1	A0A0C4DH35	W,N	66,73	73	K.GLEwVSGVSWnGSRTHYADSVK.G	HexNAc(4)Hex(5)Fuc(1)NeuAc(2)	True-positive	Replace N-glycan,Low b and y ions	HexNAc(4)Hex(5)Fuc(1)NeuAc(2)	SA	a	4818.0026; 4817.9938	Dioxidation/31.9898; NGlycan/2351.8508	1	a_hIgA-SA-GLTrFASP-FZpipHILIC_E1_step.raw_20240829_noglyc_spec_cut	208.87	8.88e-01 - 1.00e+00	87400000	2	35.24	4	4,11	63	84	8.88e-01 - 1.00e+00	2.3 - 100.9	0.0	1205.5079; 1205.5057	1205.51	-0.94; -2.77	-1	4818.01	12	7.21e+06	35.24	12-11890	HexNAc(4)Hex(5)Fuc(3)NeuAc(1)
57	36171	35.9000	13208	sp|A0A0C4DH35|HV335_HUMAN Probable non-functional immunoglobulin heavy variable 3-35 OS=Homo sapiens OX=9606 GN=IGHV3-35 PE=1 SV=1	A0A0C4DH35	W,N	66,73	73	K.GLEwVSGVSWnGSRTHYADSVK.G	HexNAc(5)Hex(4)NeuAc(2)	Uncertain			SA	c	4695.9697	Oxidation/15.9949; NGlycan/2245.7990	1	c_hIgA-SA-GLTrFASP-FZpipHILIC_E1_step.raw_20240829_noglyc_spec_cut	171.06	0.96	148000000	2	35.56	4	4,11	63	84	0.96	43.0	0.0	1174.9997	1175	1.97	0	4695.96	6	1.59e+07	35.56	6-13208	HexNAc(5)Hex(4)NeuAc(2)
58	11745; 31409; 55796; 70713; 98127; 98131; 124585; 124588; 130603	36.1800; 36.0700; 36.4600; 36.0400; 35.1400; 35.5100; 35.4500; 35.7100	12965; 12759; 13454; 13056; 10745; 10890; 11240; 11262; 11092	sp|A0A0C4DH35|HV335_HUMAN Probable non-functional immunoglobulin heavy variable 3-35 OS=Homo sapiens OX=9606 GN=IGHV3-35 PE=1 SV=1	A0A0C4DH35	W,N	72,73	73	K.GLEWVSGVSwnGSRTHYADSVKGR.F	HexNAc(4)Hex(6)NeuAc(1)	Uncertain			SA	b	4755.0128; 4755.0189; 4755.0165; 4755.0072; 4755.0136; 4755.0218; 4755.0203; 4755.0140; 4755.0160	Dioxidation/31.9898; NGlycan/2075.7298	2	b_hIgA-SA-GLTrFASP-FZpipHILIC_D_step.raw_20240829_noglyc_spec_cut; c_hIgA-SA-GLTrFASP-FZpipHILIC_D_step.raw_20240829_noglyc_spec_cut; d_hIgA-SA-GLTrFASP-FZpipHILIC_E1_step.raw_20240829_noglyc_spec_cut; a_hIgA-SA-GLTrFASP-FZpipHILIC_D_step.raw_20240829_noglyc_spec_cut; a_hIgA-AR-GLTrFASP-FZpipHILIC_218mAbs-Dil1-5_D_step.raw_20240829_noglyc_spec_cut; c_hIgA-AR-GLTrFASP-FZpipHILIC_55mAbs_E1_step.raw…	196.93	9.12e-01 - 1.00e+00		2	35.20 - 36.15	4	10,11	63	86	9.56e-01 - 1.00e+00	5.3 - 113.0	5.3 - 79.5	1189.7605; 1189.7620; 1189.7614; 1189.7591; 1189.7607; 1189.7627; 1189.7623; 1189.7608; 1189.7613	1189.76	0.83; 2.11; 1.61; -0.35; 1.00; 2.73; 2.41; 1.09; 1.50	-1	4755.01	2; 5; 9; 11; 16; 21; 22	1.264e+07 - 3.940e+07	35.20 - 36.15	2; 5; 9; 11; 16; 21; 22-12965	HexNAc(4)Hex(6)NeuAc(1)
58.1	11745	36.1800	12965	sp|A0A0C4DH35|HV335_HUMAN Probable non-functional immunoglobulin heavy variable 3-35 OS=Homo sapiens OX=9606 GN=IGHV3-35 PE=1 SV=1	A0A0C4DH35	W,N	72,73	73	K.GLEWVSGVSwnGSRTHYADSVKGR.F	HexNAc(4)Hex(6)NeuAc(1)	Uncertain			SA	b	4755.0128	Dioxidation/31.9898; NGlycan/2075.7298	1	b_hIgA-SA-GLTrFASP-FZpipHILIC_D_step.raw_20240829_noglyc_spec_cut	138.96	0.99	181000000	2	35.95	4	10,11	63	86	0.99	66.0	63.3	1189.7605	1189.76	0.83	-1	4755.01	2	1.26e+07	35.95	2-12965	HexNAc(4)Hex(6)NeuAc(1)
58.2	55796	36.4600	13454	sp|A0A0C4DH35|HV335_HUMAN Probable non-functional immunoglobulin heavy variable 3-35 OS=Homo sapiens OX=9606 GN=IGHV3-35 PE=1 SV=1	A0A0C4DH35	W,N	72,73	73	K.GLEWVSGVSwnGSRTHYADSVKGR.F	HexNAc(4)Hex(6)NeuAc(1)	Uncertain			SA	d	4755.0165	Dioxidation/31.9898; NGlycan/2075.7298	1	d_hIgA-SA-GLTrFASP-FZpipHILIC_E1_step.raw_20240829_noglyc_spec_cut	141.1	1	620000000	2	35.88	4	10,11	63	86	1	113.0	79.5	1189.7614	1189.76	1.61	-1	4755.01	9	3.94e+07	35.88	9-13454	HexNAc(4)Hex(6)NeuAc(1)
58.3	124585; 124588	35.4500; 35.5100	11240; 11262	sp|A0A0C4DH35|HV335_HUMAN Probable non-functional immunoglobulin heavy variable 3-35 OS=Homo sapiens OX=9606 GN=IGHV3-35 PE=1 SV=1	A0A0C4DH35	W,N	72,73	73	K.GLEWVSGVSwnGSRTHYADSVKGR.F	HexNAc(4)Hex(6)NeuAc(1)	Uncertain			AR	c	4755.0203; 4755.0140	Dioxidation/31.9898; NGlycan/2075.7298	1	c_hIgA-AR-GLTrFASP-FZpipHILIC_55mAbs_E1_step.raw_20240829_noglyc_spec_cut	196.93	1.00e+00 - 1.00e+00	301000000	2	35.20	4	10,11	63	86	1.00e+00 - 1.00e+00	5.3 - 53.0	5.3 - 53.0	1189.7623; 1189.7608	1189.76	2.41; 1.09	-1	4755.01	21	3.1e+07	35.20	21-11240	HexNAc(4)Hex(6)NeuAc(1)
58.3.1	124588	35.5100	11262	sp|A0A0C4DH35|HV335_HUMAN Probable non-functional immunoglobulin heavy variable 3-35 OS=Homo sapiens OX=9606 GN=IGHV3-35 PE=1 SV=1	A0A0C4DH35	W,N	72,73	73	K.GLEWVSGVSwnGSRTHYADSVKGR.F	HexNAc(4)Hex(6)NeuAc(1)	Uncertain			AR	c	4755.0140	Dioxidation/31.9898; NGlycan/2075.7298	0	c_hIgA-AR-GLTrFASP-FZpipHILIC_55mAbs_E1_step.raw_20240829_noglyc_spec_cut	196.93	1	301000000	2	35.20	4	10,11	63	86	1	53.0	53.0	1189.7608	1189.76	1.09	-1	4755.01	21	3.1e+07	35.20	21-11262	HexNAc(4)Hex(6)NeuAc(1)
58.4	130603	35.7100	11092	sp|A0A0C4DH35|HV335_HUMAN Probable non-functional immunoglobulin heavy variable 3-35 OS=Homo sapiens OX=9606 GN=IGHV3-35 PE=1 SV=1	A0A0C4DH35	W,N	72,73	73	K.GLEWVSGVSwnGSRTHYADSVKGR.F	HexNAc(4)Hex(6)NeuAc(1)	Uncertain			AR	c	4755.0160	Dioxidation/31.9898; NGlycan/2075.7298	1	c_hIgA-AR-GLTrFASP-FZpipHILIC_209mAbs-Dil1-5_D_step.raw_20240829_noglyc_spec_cut	105.52	0.91	341000000	2	35.37	4	10,11	63	86	0.96	74.2	31.8	1189.7613	1189.76	1.50	-1	4755.01	22	3.07e+07	35.37	22-11092	HexNAc(4)Hex(6)NeuAc(1)
59	16706; 16727; 31467; 56074; 75159; 75181; 81852; 98165; 115086; 115091; 130688; 130694	42.5600; 42.8000; 42.6500; 42.5800; 42.5200; 42.7800; 42.1400; 41.8200; 41.8800; 42.0700; 41.8100; 42.1000	15645; 15738; 15297; 15857; 14769; 14870; 13558; 13292; 13411; 13478; 13422; 13521	sp|A0A0C4DH35|HV335_HUMAN Probable non-functional immunoglobulin heavy variable 3-35 OS=Homo sapiens OX=9606 GN=IGHV3-35 PE=1 SV=1	A0A0C4DH35	W,N	72,73	73	K.GLEWVSGVSwnGSRTHYADSVKGR.F	HexNAc(3)Hex(7)NeuAc(1)Phospho(1)	Uncertain			SA	b	4793.9549; 4793.9596; 4793.9564; 4793.9523; 4793.9538; 4793.9552; 4793.9556; 4793.9534; 4793.9565; 4793.9495; 4793.9514; 4793.9500	Dioxidation/31.9898; NGlycan/2114.6696	2	b_hIgA-SA-GLTrFASP-FZpipHILIC_E1_step.raw_20240829_noglyc_spec_cut; c_hIgA-SA-GLTrFASP-FZpipHILIC_D_step.raw_20240829_noglyc_spec_cut; d_hIgA-SA-GLTrFASP-FZpipHILIC_E1_step.raw_20240829_noglyc_spec_cut; a_hIgA-SA-GLTrFASP-FZpipHILIC_E1_step.raw_20240829_noglyc_spec_cut; d_hIgA-AR-GLTrFASP-FZpipHILIC_217mAbs-Dil1-5_D_step.raw_20240829_noglyc_spec_cut; a_hIgA-AR-GLTrFASP-FZpipHILIC_218mAbs-Dil1-5_D…	113.96	8.80e-01 - 1.00e+00		2	41.87 - 42.66	4	10,11	63	86	8.80e-01 - 1.00e+00	17.4 - 58.2	0.0 - 51.3	1199.4960; 1199.4972; 1199.4964; 1199.4954; 1199.4957; 1199.4961; 1199.4962; 1199.4956; 1199.4964; 1199.4947; 1199.4951; 1199.4948	1199.49	1.30; 2.30; 1.62; 0.78; 1.07; 1.38; 1.45; 1.00; 1.64; 0.19; 0.59; 0.28	-1 - 0	4793.95	3; 5; 9; 12; 13; 16; 19; 22	7.241e+05 - 6.675e+06	41.87 - 42.66	3; 5; 9; 12; 13; 16; 19; 22-15645	HexNAc(3)Hex(7)NeuAc(1)Phospho(1)
59.1	16706; 16727	42.5600; 42.8000	15645; 15738	sp|A0A0C4DH35|HV335_HUMAN Probable non-functional immunoglobulin heavy variable 3-35 OS=Homo sapiens OX=9606 GN=IGHV3-35 PE=1 SV=1	A0A0C4DH35	W,N	72,73	73	K.GLEWVSGVSwnGSRTHYADSVKGR.F	HexNAc(3)Hex(7)NeuAc(1)Phospho(1)	Uncertain			SA	b	4793.9549; 4793.9596	Dioxidation/31.9898; NGlycan/2114.6696	1	b_hIgA-SA-GLTrFASP-FZpipHILIC_E1_step.raw_20240829_noglyc_spec_cut	111.95	1.00e+00 - 1.00e+00	82800000	2	42.66	4	10,11	63	86	1.00e+00 - 1.00e+00	44.3 - 58.2	32.2 - 44.3	1199.4960; 1199.4972	1199.49	1.30; 2.30	-1 - 0	4793.95	3	6.36e+06	42.66	3-15645	HexNAc(3)Hex(7)NeuAc(1)Phospho(1)
59.1.1	16727	42.8000	15738	sp|A0A0C4DH35|HV335_HUMAN Probable non-functional immunoglobulin heavy variable 3-35 OS=Homo sapiens OX=9606 GN=IGHV3-35 PE=1 SV=1	A0A0C4DH35	W,N	72,73	73	K.GLEWVSGVSwnGSRTHYADSVKGR.F	HexNAc(3)Hex(7)NeuAc(1)Phospho(1)	Uncertain			SA	b	4793.9596	Dioxidation/31.9898; NGlycan/2114.6696	0	b_hIgA-SA-GLTrFASP-FZpipHILIC_E1_step.raw_20240829_noglyc_spec_cut	111.95	1	82800000	2	42.66	4	10,11	63	86	1	58.2	32.2	1199.4972	1199.49	2.30	-1	4793.95	3	6.36e+06	42.66	3-15738	HexNAc(3)Hex(7)NeuAc(1)Phospho(1)
59.2	31467	42.6500	15297	sp|A0A0C4DH35|HV335_HUMAN Probable non-functional immunoglobulin heavy variable 3-35 OS=Homo sapiens OX=9606 GN=IGHV3-35 PE=1 SV=1	A0A0C4DH35	W,N	72,73	73	K.GLEWVSGVSwnGSRTHYADSVKGR.F	HexNAc(3)Hex(7)NeuAc(1)Phospho(1)	Uncertain			SA	c	4793.9564	Dioxidation/31.9898; NGlycan/2114.6696	1	c_hIgA-SA-GLTrFASP-FZpipHILIC_D_step.raw_20240829_noglyc_spec_cut	113.96	0.99	5050000	2	42.61	4	10,11	63	86	0.99	20.5	20.5	1199.4964	1199.49	1.62	0	4793.95	5	7.24e+05	42.61	5-15297	HexNAc(3)Hex(7)NeuAc(1)Phospho(1)
59.3	81852	42.1400	13558	sp|A0A0C4DH35|HV335_HUMAN Probable non-functional immunoglobulin heavy variable 3-35 OS=Homo sapiens OX=9606 GN=IGHV3-35 PE=1 SV=1	A0A0C4DH35	W,N	72,73	73	K.GLEWVSGVSwnGSRTHYADSVKGR.F	HexNAc(3)Hex(7)NeuAc(1)Phospho(1)	Uncertain			AR	d	4793.9556	Dioxidation/31.9898; NGlycan/2114.6696	1	d_hIgA-AR-GLTrFASP-FZpipHILIC_217mAbs-Dil1-5_D_step.raw_20240829_noglyc_spec_cut	101.84	0.88	35500000	2	41.93	4	10,11	63	86	0.88	51.3	51.3	1199.4962	1199.49	1.45	0	4793.95	13	3.36e+06	41.93	13-13558	HexNAc(3)Hex(7)NeuAc(1)Phospho(1)
60	81786	36.1700	11280	sp|A0A0C4DH35|HV335_HUMAN Probable non-functional immunoglobulin heavy variable 3-35 OS=Homo sapiens OX=9606 GN=IGHV3-35 PE=1 SV=1	A0A0C4DH35	W,N	72,73	73	K.GLEWVSGVSwnGSRTHYADSVKGR.F	HexNAc(3)Hex(7)Phospho(1)	Uncertain			AR	d	4486.8375	Oxidation/15.9949; NGlycan/1823.5742	1	d_hIgA-AR-GLTrFASP-FZpipHILIC_217mAbs-Dil1-5_D_step.raw_20240829_noglyc_spec_cut	108.09	1	16600000	2	36.13	4	10,11	63	86	1	77.4	77.4	1122.7167	1122.72	-4.63	-1	4486.86	13	1.74e+06	36.13	13-11280	HexNAc(3)Hex(7)Phospho(1)
61	11813; 11814; 16586; 16606; 31465; 31466; 36429; 36553; 55995; 56072; 70753; 70754; 75081; 81853; 130640	42.7000; 42.7100; 41.1600; 41.4500; 42.5700; 42.5800; 42.5500; 41.2900; 42.8400; 42.8500; 41.5800; 42.1600; 38.0900	15482; 15484; 15099; 15212; 15266; 15269; 15275; 15820; 15355; 15845; 15691; 15694; 14402; 13565; 12002	sp|A0A0C4DH35|HV335_HUMAN Probable non-functional immunoglobulin heavy variable 3-35 OS=Homo sapiens OX=9606 GN=IGHV3-35 PE=1 SV=1	A0A0C4DH35	W,N	72,73	73	K.GLEWVSGVSwnGSRTHYADSVKGR.F	HexNAc(3)Hex(7)NeuAc(1)Phospho(1)	Uncertain			SA	b	4777.9334; 4777.9334; 4777.9349; 4777.9340; 4777.9378; 4777.9378; 4777.9320; 4777.9317; 4777.9391; 4777.9327; 4777.9334; 4777.9334; 4777.9361; 4777.9340; 4777.9376	Oxidation/15.9949; NGlycan/2114.6696	2	b_hIgA-SA-GLTrFASP-FZpipHILIC_D_step.raw_20240829_noglyc_spec_cut; b_hIgA-SA-GLTrFASP-FZpipHILIC_E1_step.raw_20240829_noglyc_spec_cut; c_hIgA-SA-GLTrFASP-FZpipHILIC_D_step.raw_20240829_noglyc_spec_cut; c_hIgA-SA-GLTrFASP-FZpipHILIC_E1_step.raw_20240829_noglyc_spec_cut; d_hIgA-SA-GLTrFASP-FZpipHILIC_E1_step.raw_20240829_noglyc_spec_cut; a_hIgA-SA-GLTrFASP-FZpipHILIC_D_step.raw_20240829_noglyc_spec…	181.95	9.90e-01 - 1.00e+00		2	38.03 - 42.83	4	10,11	63	86	9.96e-01 - 1.00e+00	2.7 - 135.3	2.7 - 114.0	1195.4906; 1195.4906; 1195.4910; 1195.4908; 1195.4917; 1195.4917; 1195.4903; 1195.4902; 1195.4921; 1195.4905; 1195.4906; 1195.4906; 1195.4913; 1195.4908; 1195.4917	1195.5	-4.25; -4.25; -3.93; -4.12; -3.33; -3.33; -4.54; -4.59; -3.05; -4.39; -4.24; -4.24; -3.68; -4.12; -3.36	-1 - 0	4777.95	2; 3; 5; 6; 9; 11; 12; 13; 22	1.949e+06 - 2.596e+07	38.03 - 42.83	2; 3; 5; 6; 9; 11; 12; 13; 22-15482	HexNAc(3)Hex(7)NeuAc(1)Phospho(1)
61.1	16586; 16606	41.1600; 41.4500	15099; 15212	sp|A0A0C4DH35|HV335_HUMAN Probable non-functional immunoglobulin heavy variable 3-35 OS=Homo sapiens OX=9606 GN=IGHV3-35 PE=1 SV=1	A0A0C4DH35	W,N	72,73	73	K.GLEWVSGVSwnGSRTHYADSVKGR.F	HexNAc(3)Hex(7)NeuAc(1)Phospho(1)	Uncertain			SA	b	4777.9349; 4777.9340	Oxidation/15.9949; NGlycan/2114.6696	1	b_hIgA-SA-GLTrFASP-FZpipHILIC_E1_step.raw_20240829_noglyc_spec_cut	110.54	1.00e+00 - 1.00e+00	297000000	2	40.86	4	10,11	63	86	1.00e+00 - 1.00e+00	32.1 - 62.4	28.5 - 56.1	1195.4910; 1195.4908	1195.5	-3.93; -4.12	-1	4777.95	3	2.17e+07	40.86	3-15099	HexNAc(3)Hex(7)NeuAc(1)Phospho(1)
61.1.1	16606	41.4500	15212	sp|A0A0C4DH35|HV335_HUMAN Probable non-functional immunoglobulin heavy variable 3-35 OS=Homo sapiens OX=9606 GN=IGHV3-35 PE=1 SV=1	A0A0C4DH35	W,N	72,73	73	K.GLEWVSGVSwnGSRTHYADSVKGR.F	HexNAc(3)Hex(7)NeuAc(1)Phospho(1)	Uncertain			SA	b	4777.9340	Oxidation/15.9949; NGlycan/2114.6696	0	b_hIgA-SA-GLTrFASP-FZpipHILIC_E1_step.raw_20240829_noglyc_spec_cut	110.54	1	297000000	2	40.86	4	10,11	63	86	1	62.4	56.1	1195.4908	1195.5	-4.12	-1	4777.95	3	2.17e+07	40.86	3-15212	HexNAc(3)Hex(7)NeuAc(1)Phospho(1)
61.2	31465; 31466	42.5700; 42.5800	15266; 15269	sp|A0A0C4DH35|HV335_HUMAN Probable non-functional immunoglobulin heavy variable 3-35 OS=Homo sapiens OX=9606 GN=IGHV3-35 PE=1 SV=1	A0A0C4DH35	W,N	72,73	73	K.GLEWVSGVSwnGSRTHYADSVKGR.F	HexNAc(3)Hex(7)NeuAc(1)Phospho(1)	Uncertain			SA	c	4777.9378; 4777.9378	Oxidation/15.9949; NGlycan/2114.6696	1	c_hIgA-SA-GLTrFASP-FZpipHILIC_D_step.raw_20240829_noglyc_spec_cut	181.95	9.97e-01 - 9.98e-01	14800000	2	42.59	4	10,11	63	86	9.97e-01 - 9.98e-01	133.9 - 135.3	112.3 - 114.0	1195.4917; 1195.4917	1195.5	-3.33; -3.33	-1	4777.95	5	1.95e+06	42.59	5-15266	HexNAc(3)Hex(7)NeuAc(1)Phospho(1)
61.2.2	31466	42.5800	15269	sp|A0A0C4DH35|HV335_HUMAN Probable non-functional immunoglobulin heavy variable 3-35 OS=Homo sapiens OX=9606 GN=IGHV3-35 PE=1 SV=1	A0A0C4DH35	W,N	72,73	73	K.GLEWVSGVSwnGSRTHYADSVKGR.F	HexNAc(3)Hex(7)NeuAc(1)Phospho(1)	Uncertain			SA	c	4777.9378	Oxidation/15.9949; NGlycan/2114.6696	0	c_hIgA-SA-GLTrFASP-FZpipHILIC_D_step.raw_20240829_noglyc_spec_cut	139.04	1	14800000	2	42.59	4	10,11	63	86	1	133.9	112.3	1195.4917	1195.5	-3.33	-1	4777.95	5	1.95e+06	42.59	5-15269	HexNAc(3)Hex(7)NeuAc(1)Phospho(1)
61.3	70753; 70754	42.8400; 42.8500	15691; 15694	sp|A0A0C4DH35|HV335_HUMAN Probable non-functional immunoglobulin heavy variable 3-35 OS=Homo sapiens OX=9606 GN=IGHV3-35 PE=1 SV=1	A0A0C4DH35	W,N	72,73	73	K.GLEWVSGVSwnGSRTHYADSVKGR.F	HexNAc(3)Hex(7)NeuAc(1)Phospho(1)	Uncertain			SA	a	4777.9334; 4777.9334	Oxidation/15.9949; NGlycan/2114.6696	1	a_hIgA-SA-GLTrFASP-FZpipHILIC_D_step.raw_20240829_noglyc_spec_cut	154.38	9.90e-01 - 9.95e-01	18500000	2	42.83	4	10,11	63	86	9.99e-01 - 1.00e+00	83.4 - 85.1	83.4 - 85.1	1195.4906; 1195.4906	1195.5	-4.24; -4.24	-1	4777.95	11	2.82e+06	42.83	11-15691	HexNAc(3)Hex(7)NeuAc(1)Phospho(1)
61.4	75081	41.5800	14402	sp|A0A0C4DH35|HV335_HUMAN Probable non-functional immunoglobulin heavy variable 3-35 OS=Homo sapiens OX=9606 GN=IGHV3-35 PE=1 SV=1	A0A0C4DH35	W,N	72,73	73	K.GLEWVSGVSwnGSRTHYADSVKGR.F	HexNAc(3)Hex(7)NeuAc(1)Phospho(1)	Uncertain			SA	a	4777.9361	Oxidation/15.9949; NGlycan/2114.6696	1	a_hIgA-SA-GLTrFASP-FZpipHILIC_E1_step.raw_20240829_noglyc_spec_cut	138.72	1	17200000	2	41.48	4	10,11	63	86	1	43.0	43.0	1195.4913	1195.5	-3.68	-1	4777.95	12	2.11e+06	41.48	12-14402	HexNAc(3)Hex(7)NeuAc(1)Phospho(1)
61.5	81853	42.1600	13565	sp|A0A0C4DH35|HV335_HUMAN Probable non-functional immunoglobulin heavy variable 3-35 OS=Homo sapiens OX=9606 GN=IGHV3-35 PE=1 SV=1	A0A0C4DH35	W,N	72,73	73	K.GLEWVSGVSwnGSRTHYADSVKGR.F	HexNAc(3)Hex(7)NeuAc(1)Phospho(1)	Uncertain			AR	d	4777.9340	Oxidation/15.9949; NGlycan/2114.6696	1	d_hIgA-AR-GLTrFASP-FZpipHILIC_217mAbs-Dil1-5_D_step.raw_20240829_noglyc_spec_cut	114.95	1	39300000	2	41.93	4	10,11	63	86	1	62.8	62.8	1195.4908	1195.5	-4.12	-1	4777.95	13	3.36e+06	41.93	13-13565	HexNAc(3)Hex(7)NeuAc(1)Phospho(1)
62	22258; 61235	22.2000	6554; 6714	sp|P0C0L5|CO4B_HUMAN Complement C4-B OS=Homo sapiens OX=9606 GN=C4B PE=1 SV=2	P0C0L5	N	1328	1328	R.GLnVTLSSTGR.N	HexNAc(3)Hex(4)	Uncertain			SA	b	2361.0535; 2361.0505	NGlycan/1257.4494	2	b_hIgA-SA-GLTrFASP-FZpipHILIC_E2_step.raw_20240829_noglyc_spec_cut; d_hIgA-SA-GLTrFASP-FZpipHILIC_E2_step.raw_20240829_noglyc_spec_cut	140.02	5.53e-01 - 9.54e-01		1	22.18 - 22.24	2	3	1326	1336	8.56e-01 - 9.54e-01	136.0 - 140.0	136.0 - 140.0	1181.5340; 1181.5325	1181.53	4.49; 3.22	0	2361.04	4; 10	1.803e+06 - 2.066e+06	22.18 - 22.24	4; 10-6554	HexNAc(3)Hex(4)
62.1	22258	22.2000	6554	sp|P0C0L5|CO4B_HUMAN Complement C4-B OS=Homo sapiens OX=9606 GN=C4B PE=1 SV=2	P0C0L5	N	1328	1328	R.GLnVTLSSTGR.N	HexNAc(3)Hex(4)	Uncertain			SA	b	2361.0535	NGlycan/1257.4494	1	b_hIgA-SA-GLTrFASP-FZpipHILIC_E2_step.raw_20240829_noglyc_spec_cut	135.98	0.55	12800000	1	22.18	2	3	1326	1336	0.86	136.0	136.0	1181.5340	1181.53	4.49	0	2361.04	4	1.8e+06	22.18	4-6554	HexNAc(3)Hex(4)
62.2	61235	22.2000	6714	sp|P0C0L5|CO4B_HUMAN Complement C4-B OS=Homo sapiens OX=9606 GN=C4B PE=1 SV=2	P0C0L5	N	1328	1328	R.GLnVTLSSTGR.N	HexNAc(3)Hex(4)	Uncertain			SA	d	2361.0505	NGlycan/1257.4494	1	d_hIgA-SA-GLTrFASP-FZpipHILIC_E2_step.raw_20240829_noglyc_spec_cut	140.02	0.95	15900000	1	22.24	2	3	1326	1336	0.95	140.0	140.0	1181.5325	1181.53	3.22	0	2361.04	10	2.07e+06	22.24	10-6714	HexNAc(3)Hex(4)
63	101080; 118069; 133858	30.4200; 30.3700; 30.2800	9869; 9993; 9299	sp|P01871|IGHM_HUMAN Immunoglobulin heavy constant mu OS=Homo sapiens OX=9606 GN=IGHM PE=1 SV=4	P01871	N	209	209	R.GLTFQQnASSMCVPDQDTAIR.V	HexNAc(3)Hex(5)NeuAc(1)	Uncertain			AR	b	4048.6780; 4048.6785; 4048.6819	NGlycan/1710.5977	2	b_hIgA-AR-GLTrFASP-FZpipHILIC_11mAbs_E2_step.raw_20240829_noglyc_spec_cut; c_hIgA-AR-GLTrFASP-FZpipHILIC_16mAbs_E2_step.raw_20240829_noglyc_spec_cut; d_hIgA-AR-GLTrFASP-FZpipHILIC_16mAbs_E2_step.raw_20240829_noglyc_spec_cut	128.98	8.89e-01 - 9.99e-01		2	30.21 - 30.41	3	7	203	223	9.78e-01 - 1.00e+00	20.1 - 71.9	20.1 - 71.9	1350.5666; 1350.5668; 1350.5679	1350.56	2.99; 3.14; 3.98	0 - 1	4048.67	17; 20; 23	1.017e+06 - 2.379e+06	30.21 - 30.41	17; 20; 23-9869	HexNAc(3)Hex(5)NeuAc(1)
63.1	101080	30.4200	9869	sp|P01871|IGHM_HUMAN Immunoglobulin heavy constant mu OS=Homo sapiens OX=9606 GN=IGHM PE=1 SV=4	P01871	N	209	209	R.GLTFQQnASSMCVPDQDTAIR.V	HexNAc(3)Hex(5)NeuAc(1)	Uncertain			AR	b	4048.6780	NGlycan/1710.5977	1	b_hIgA-AR-GLTrFASP-FZpipHILIC_11mAbs_E2_step.raw_20240829_noglyc_spec_cut	116.58	1	18000000	2	30.41	3	7	203	223	1	34.0	34.0	1350.5666	1350.56	2.99	0	4048.67	17	2.18e+06	30.41	17-9869	HexNAc(3)Hex(5)NeuAc(1)
63.2	133858	30.2800	9299	sp|P01871|IGHM_HUMAN Immunoglobulin heavy constant mu OS=Homo sapiens OX=9606 GN=IGHM PE=1 SV=4	P01871	N	209	209	R.GLTFQQnASSMCVPDQDTAIR.V	HexNAc(3)Hex(5)NeuAc(1)	Uncertain			AR	d	4048.6819	NGlycan/1710.5977	1	d_hIgA-AR-GLTrFASP-FZpipHILIC_16mAbs_E2_step.raw_20240829_noglyc_spec_cut	128.98	0.89	21500000	2	30.21	3	7	203	223	0.98	71.9	71.9	1350.5679	1350.56	3.98	1	4048.67	23	2.38e+06	30.21	23-9299	HexNAc(3)Hex(5)NeuAc(1)
64	118535; 134471; 142004	35.2900; 35.3700; 35.8800	11789; 11250; 11491	sp|P01871|IGHM_HUMAN Immunoglobulin heavy constant mu OS=Homo sapiens OX=9606 GN=IGHM PE=1 SV=4	P01871	N	209	209	R.GLTFQQnASSMCVPDQDTAIR.V	HexNAc(4)Hex(5)Fuc(1)NeuAc(2)	True-positive	Replace N-glycan	HexNAc(4)Hex(5)Fuc(1)NeuAc(2)	AR	c	4689.9134; 4689.9111; 4689.9204	NGlycan/2351.8508	2	c_hIgA-AR-GLTrFASP-FZpipHILIC_16mAbs_E2_step.raw_20240829_noglyc_spec_cut; d_hIgA-AR-GLTrFASP-FZpipHILIC_16mAbs_E2_step.raw_20240829_noglyc_spec_cut; d_hIgA-AR-GLTrFASP-FZpipHILIC_35mAbs_E1_step.raw_20240829_noglyc_spec_cut	723.46	5.20e-12 - 1.72e-02		2	35.36 - 35.98	4	7	203	223	3.61e-11 - 9.17e-02	3.7 - 638.6	0.0 - 3.7	1173.4856; 1173.4851; 1173.4874	1173.49	-1.17; -1.67; 0.32	-1	4689.92	20; 23; 24	1.419e+06 - 7.065e+06	35.36 - 35.98	20; 23; 24-11789	HexNAc(4)Hex(5)Fuc(3)NeuAc(1)
64.1	118535	35.2900	11789	sp|P01871|IGHM_HUMAN Immunoglobulin heavy constant mu OS=Homo sapiens OX=9606 GN=IGHM PE=1 SV=4	P01871	N	209	209	R.GLTFQQnASSMCVPDQDTAIR.V	HexNAc(4)Hex(5)Fuc(1)NeuAc(2)	True-positive	Replace N-glycan	HexNAc(4)Hex(5)Fuc(1)NeuAc(2)	AR	c	4689.9134	NGlycan/2351.8508	1	c_hIgA-AR-GLTrFASP-FZpipHILIC_16mAbs_E2_step.raw_20240829_noglyc_spec_cut	723.46	5.5e-12	13300000	2	35.36	4	7	203	223	5.4e-11	629.1	2.3	1173.4856	1173.49	-1.17	-1	4689.92	20	1.42e+06	35.36	20-11789	HexNAc(4)Hex(5)Fuc(3)NeuAc(1)
64.2	134471	35.3700	11250	sp|P01871|IGHM_HUMAN Immunoglobulin heavy constant mu OS=Homo sapiens OX=9606 GN=IGHM PE=1 SV=4	P01871	N	209	209	R.GLTFQQnASSMCVPDQDTAIR.V	HexNAc(4)Hex(5)Fuc(1)NeuAc(2)	True-positive	Replace N-glycan	HexNAc(4)Hex(5)Fuc(1)NeuAc(2)	AR	d	4689.9111	NGlycan/2351.8508	1	d_hIgA-AR-GLTrFASP-FZpipHILIC_16mAbs_E2_step.raw_20240829_noglyc_spec_cut	721.87	5.2e-12	30600000	2	35.39	4	7	203	223	3.6e-11	638.6	0.0	1173.4851	1173.49	-1.67	-1	4689.92	23	3.19e+06	35.39	23-11250	HexNAc(4)Hex(5)Fuc(3)NeuAc(1)
65	85388; 85395; 85403; 101672; 118550; 118556; 118567	35.3100; 35.3400; 35.3900; 35.3800; 35.4300; 35.5000	10837; 10849; 10867; 11743; 11825; 11839; 11863	sp|P01871|IGHM_HUMAN Immunoglobulin heavy constant mu OS=Homo sapiens OX=9606 GN=IGHM PE=1 SV=4	P01871	N	209	209	R.GLTFQQnASSMCVPDQDTAIR.V	HexNAc(5)Hex(6)Fuc(2)NeuAc(1)	Uncertain			AR	a	4909.0067; 4909.0095; 4909.0096; 4909.0149; 4909.0132; 4909.0108; 4909.0157	NGlycan/2570.9250	2	a_hIgA-AR-GLTrFASP-FZpipHILIC_8mAbs_E2_step.raw_20240829_noglyc_spec_cut; b_hIgA-AR-GLTrFASP-FZpipHILIC_11mAbs_E2_step.raw_20240829_noglyc_spec_cut; c_hIgA-AR-GLTrFASP-FZpipHILIC_16mAbs_E2_step.raw_20240829_noglyc_spec_cut	229.05	7.57e-05 - 1.50e-01		2	35.35 - 35.38	4	7	203	223	7.43e-04 - 6.08e-01	53.4 - 193.5	53.4 - 193.5	1228.2590; 1228.2597; 1228.2597; 1228.2610; 1228.2606; 1228.2600; 1228.2612	1228.26	2.75; 3.32; 3.34; 4.42; 4.07; 3.59; 4.57	-1 - 1	4908.99	14; 17; 20	9.086e+05 - 2.151e+06	35.35 - 35.38	14; 17; 20-10837	HexNAc(5)Hex(6)Fuc(2)NeuAc(1)
65.1	85388; 85395; 85403	35.3100; 35.3400; 35.3900	10837; 10849; 10867	sp|P01871|IGHM_HUMAN Immunoglobulin heavy constant mu OS=Homo sapiens OX=9606 GN=IGHM PE=1 SV=4	P01871	N	209	209	R.GLTFQQnASSMCVPDQDTAIR.V	HexNAc(5)Hex(6)Fuc(2)NeuAc(1)	Uncertain			AR	a	4909.0067; 4909.0095; 4909.0096	NGlycan/2570.9250	1	a_hIgA-AR-GLTrFASP-FZpipHILIC_8mAbs_E2_step.raw_20240829_noglyc_spec_cut	229.05	1.94e-03 - 7.90e-02	19700000	2	35.38	4	7	203	223	1.28e-02 - 3.49e-01	97.0 - 193.5	97.0 - 193.5	1228.2590; 1228.2597; 1228.2597	1228.26	2.75; 3.32; 3.34	-1 - 1	4908.99	14	2.15e+06	35.38	14-10837	HexNAc(5)Hex(6)Fuc(2)NeuAc(1)
65.1.2	85395	35.3400	10849	sp|P01871|IGHM_HUMAN Immunoglobulin heavy constant mu OS=Homo sapiens OX=9606 GN=IGHM PE=1 SV=4	P01871	N	209	209	R.GLTFQQnASSMCVPDQDTAIR.V	HexNAc(5)Hex(6)Fuc(2)NeuAc(1)	Uncertain			AR	a	4909.0095	NGlycan/2570.9250	0	a_hIgA-AR-GLTrFASP-FZpipHILIC_8mAbs_E2_step.raw_20240829_noglyc_spec_cut	229.05	0.0019	19700000	2	35.38	4	7	203	223	0.013	193.5	193.5	1228.2597	1228.26	3.32	-1	4908.99	14	2.15e+06	35.38	14-10849	HexNAc(5)Hex(6)Fuc(2)NeuAc(1)
65.1.3	85403	35.3900	10867	sp|P01871|IGHM_HUMAN Immunoglobulin heavy constant mu OS=Homo sapiens OX=9606 GN=IGHM PE=1 SV=4	P01871	N	209	209	R.GLTFQQnASSMCVPDQDTAIR.V	HexNAc(5)Hex(6)Fuc(2)NeuAc(1)	Uncertain			AR	a	4909.0096	NGlycan/2570.9250	0	a_hIgA-AR-GLTrFASP-FZpipHILIC_8mAbs_E2_step.raw_20240829_noglyc_spec_cut	124.77	0.079	19700000	2	35.38	4	7	203	223	0.35	97.0	97.0	1228.2597	1228.26	3.34	0	4908.99	14	2.15e+06	35.38	14-10867	HexNAc(5)Hex(6)Fuc(2)NeuAc(1)
65.2	101672	35.3800	11743	sp|P01871|IGHM_HUMAN Immunoglobulin heavy constant mu OS=Homo sapiens OX=9606 GN=IGHM PE=1 SV=4	P01871	N	209	209	R.GLTFQQnASSMCVPDQDTAIR.V	HexNAc(5)Hex(6)Fuc(2)NeuAc(1)	Uncertain			AR	b	4909.0149	NGlycan/2570.9250	1	b_hIgA-AR-GLTrFASP-FZpipHILIC_11mAbs_E2_step.raw_20240829_noglyc_spec_cut	178.31	0.00045	20700000	2	35.35	4	7	203	223	0.003	170.8	170.8	1228.2610	1228.26	4.42	-1	4908.99	17	2.13e+06	35.35	17-11743	HexNAc(5)Hex(6)Fuc(2)NeuAc(1)
65.3	118550; 118556; 118567	35.3900; 35.4300; 35.5000	11825; 11839; 11863	sp|P01871|IGHM_HUMAN Immunoglobulin heavy constant mu OS=Homo sapiens OX=9606 GN=IGHM PE=1 SV=4	P01871	N	209	209	R.GLTFQQnASSMCVPDQDTAIR.V	HexNAc(5)Hex(6)Fuc(2)NeuAc(1)	Uncertain			AR	c	4909.0132; 4909.0108; 4909.0157	NGlycan/2570.9250	1	c_hIgA-AR-GLTrFASP-FZpipHILIC_16mAbs_E2_step.raw_20240829_noglyc_spec_cut	206.13	7.57e-05 - 1.50e-01	7260000	2	35.36	4	7	203	223	7.43e-04 - 6.08e-01	53.4 - 163.1	53.4 - 163.1	1228.2606; 1228.2600; 1228.2612	1228.26	4.07; 3.59; 4.57	-1 - 0	4908.99	20	9.09e+05	35.36	20-11825	HexNAc(5)Hex(6)Fuc(2)NeuAc(1)
65.3.2	118556	35.4300	11839	sp|P01871|IGHM_HUMAN Immunoglobulin heavy constant mu OS=Homo sapiens OX=9606 GN=IGHM PE=1 SV=4	P01871	N	209	209	R.GLTFQQnASSMCVPDQDTAIR.V	HexNAc(5)Hex(6)Fuc(2)NeuAc(1)	Uncertain			AR	c	4909.0108	NGlycan/2570.9250	0	c_hIgA-AR-GLTrFASP-FZpipHILIC_16mAbs_E2_step.raw_20240829_noglyc_spec_cut	111.86	0.022	7260000	2	35.36	4	7	203	223	0.17	111.9	111.9	1228.2600	1228.26	3.59	0	4908.99	20	9.09e+05	35.36	20-11839	HexNAc(5)Hex(6)Fuc(2)NeuAc(1)
66	85011; 101280; 118225; 118235; 134034	32.2600; 32.2300; 32.1700; 32.2500; 32.1200	9686; 10556; 10656; 10686; 10007	sp|P01871|IGHM_HUMAN Immunoglobulin heavy constant mu OS=Homo sapiens OX=9606 GN=IGHM PE=1 SV=4	P01871	N,M	209,213	209	R.GLTFQQnASSmCVPDQDTAIR.V	HexNAc(5)Hex(3)Fuc(2)NeuAc(1)	Uncertain			AR	a	4438.8361; 4438.8334; 4438.8333; 4438.8377; 4438.8371	NGlycan/2084.7666; Oxidation/15.9949	2	a_hIgA-AR-GLTrFASP-FZpipHILIC_8mAbs_E2_step.raw_20240829_noglyc_spec_cut; b_hIgA-AR-GLTrFASP-FZpipHILIC_11mAbs_E2_step.raw_20240829_noglyc_spec_cut; c_hIgA-AR-GLTrFASP-FZpipHILIC_16mAbs_E2_step.raw_20240829_noglyc_spec_cut; d_hIgA-AR-GLTrFASP-FZpipHILIC_16mAbs_E2_step.raw_20240829_noglyc_spec_cut	544.06	1.46e-08 - 1.28e-07		2	32.10 - 32.27	3	7,11	203	223	1.09e-07 - 1.26e-06	322.9 - 405.6	81.4 - 377.8	1480.6193; 1480.6184; 1480.6184; 1480.6198; 1480.6197	1480.62	1.44; 0.84; 0.81; 1.82; 1.68	0	4438.83	14; 17; 20; 23	7.663e+05 - 2.528e+06	32.10 - 32.27	14; 17; 20; 23-9686	HexNAc(5)Hex(3)Fuc(2)NeuAc(1)
66.1	85011	32.2600	9686	sp|P01871|IGHM_HUMAN Immunoglobulin heavy constant mu OS=Homo sapiens OX=9606 GN=IGHM PE=1 SV=4	P01871	N,M	209,213	209	R.GLTFQQnASSmCVPDQDTAIR.V	HexNAc(5)Hex(3)Fuc(2)NeuAc(1)	Uncertain			AR	a	4438.8361	NGlycan/2084.7666; Oxidation/15.9949	1	a_hIgA-AR-GLTrFASP-FZpipHILIC_8mAbs_E2_step.raw_20240829_noglyc_spec_cut	517.91	2.3e-08	16600000	2	32.27	3	7,11	203	223	1.5e-07	360.2	360.2	1480.6193	1480.62	1.44	0	4438.83	14	2.21e+06	32.27	14-9686	HexNAc(5)Hex(3)Fuc(2)NeuAc(1)
66.2	101280	32.2300	10556	sp|P01871|IGHM_HUMAN Immunoglobulin heavy constant mu OS=Homo sapiens OX=9606 GN=IGHM PE=1 SV=4	P01871	N,M	209,213	209	R.GLTFQQnASSmCVPDQDTAIR.V	HexNAc(5)Hex(3)Fuc(2)NeuAc(1)	Uncertain			AR	b	4438.8334	NGlycan/2084.7666; Oxidation/15.9949	1	b_hIgA-AR-GLTrFASP-FZpipHILIC_11mAbs_E2_step.raw_20240829_noglyc_spec_cut	542.49	4e-08	17500000	2	32.24	3	7,11	203	223	2.7e-07	405.6	81.4	1480.6184	1480.62	0.84	0	4438.83	17	2.08e+06	32.24	17-10556	HexNAc(5)Hex(3)Fuc(2)NeuAc(1)
66.3	118225; 118235	32.1700; 32.2500	10656; 10686	sp|P01871|IGHM_HUMAN Immunoglobulin heavy constant mu OS=Homo sapiens OX=9606 GN=IGHM PE=1 SV=4	P01871	N,M	209,213	209	R.GLTFQQnASSmCVPDQDTAIR.V	HexNAc(5)Hex(3)Fuc(2)NeuAc(1)	Uncertain			AR	c	4438.8333; 4438.8377	NGlycan/2084.7666; Oxidation/15.9949	1	c_hIgA-AR-GLTrFASP-FZpipHILIC_16mAbs_E2_step.raw_20240829_noglyc_spec_cut	544.06	1.46e-08 - 1.28e-07	6500000	2	32.18	3	7,11	203	223	1.44e-07 - 1.26e-06	322.9 - 386.8	86.7 - 322.9	1480.6184; 1480.6198	1480.62	0.81; 1.82	0	4438.83	20	7.66e+05	32.18	20-10656	HexNAc(5)Hex(3)Fuc(2)NeuAc(1)
66.3.2	118235	32.2500	10686	sp|P01871|IGHM_HUMAN Immunoglobulin heavy constant mu OS=Homo sapiens OX=9606 GN=IGHM PE=1 SV=4	P01871	N,M	209,213	209	R.GLTFQQnASSmCVPDQDTAIR.V	HexNAc(5)Hex(3)Fuc(2)NeuAc(1)	Uncertain			AR	c	4438.8377	NGlycan/2084.7666; Oxidation/15.9949	0	c_hIgA-AR-GLTrFASP-FZpipHILIC_16mAbs_E2_step.raw_20240829_noglyc_spec_cut	421.55	1.3e-07	6500000	2	32.18	3	7,11	203	223	1.3e-06	322.9	322.9	1480.6198	1480.62	1.82	0	4438.83	20	7.66e+05	32.18	20-10686	HexNAc(5)Hex(3)Fuc(2)NeuAc(1)
66.4	134034	32.1200	10007	sp|P01871|IGHM_HUMAN Immunoglobulin heavy constant mu OS=Homo sapiens OX=9606 GN=IGHM PE=1 SV=4	P01871	N,M	209,213	209	R.GLTFQQnASSmCVPDQDTAIR.V	HexNAc(5)Hex(3)Fuc(2)NeuAc(1)	Uncertain			AR	d	4438.8371	NGlycan/2084.7666; Oxidation/15.9949	1	d_hIgA-AR-GLTrFASP-FZpipHILIC_16mAbs_E2_step.raw_20240829_noglyc_spec_cut	509.27	1.6e-08	19300000	2	32.10	3	7,11	203	223	1.1e-07	377.8	377.8	1480.6197	1480.62	1.68	0	4438.83	23	2.53e+06	32.10	23-10007	HexNAc(5)Hex(3)Fuc(2)NeuAc(1)
67	85013; 101279	32.2600; 32.2300	9689; 10554	sp|P01871|IGHM_HUMAN Immunoglobulin heavy constant mu OS=Homo sapiens OX=9606 GN=IGHM PE=1 SV=4	P01871	N,M	209,213	209	R.GLTFQQnASSmCVPDQDTAIR.V	HexNAc(5)Hex(3)Fuc(2)NeuAc(1)	Uncertain			AR	a	4438.8334; 4438.8368	NGlycan/2084.7666; Oxidation/15.9949	2	a_hIgA-AR-GLTrFASP-FZpipHILIC_8mAbs_E2_step.raw_20240829_noglyc_spec_cut; b_hIgA-AR-GLTrFASP-FZpipHILIC_11mAbs_E2_step.raw_20240829_noglyc_spec_cut	465.77	1.41e-07 - 1.52e-07		2	32.20 - 32.29	4	7,11	203	223	9.33e-07 - 1.01e-06	354.3 - 357.3	74.7 - 354.3	1110.7156; 1110.7165	1110.71	0.85; 1.60	0	4438.83	14; 17	1.713e+06 - 2.110e+06	32.20 - 32.29	14; 17-9689	HexNAc(5)Hex(3)Fuc(2)NeuAc(1)
67.1	85013	32.2600	9689	sp|P01871|IGHM_HUMAN Immunoglobulin heavy constant mu OS=Homo sapiens OX=9606 GN=IGHM PE=1 SV=4	P01871	N,M	209,213	209	R.GLTFQQnASSmCVPDQDTAIR.V	HexNAc(5)Hex(3)Fuc(2)NeuAc(1)	Uncertain			AR	a	4438.8334	NGlycan/2084.7666; Oxidation/15.9949	1	a_hIgA-AR-GLTrFASP-FZpipHILIC_8mAbs_E2_step.raw_20240829_noglyc_spec_cut	465.77	1.5e-07	13700000	2	32.29	4	7,11	203	223	1e-06	357.3	74.7	1110.7156	1110.71	0.85	0	4438.83	14	1.71e+06	32.29	14-9689	HexNAc(5)Hex(3)Fuc(2)NeuAc(1)
67.2	101279	32.2300	10554	sp|P01871|IGHM_HUMAN Immunoglobulin heavy constant mu OS=Homo sapiens OX=9606 GN=IGHM PE=1 SV=4	P01871	N,M	209,213	209	R.GLTFQQnASSmCVPDQDTAIR.V	HexNAc(5)Hex(3)Fuc(2)NeuAc(1)	Uncertain			AR	b	4438.8368	NGlycan/2084.7666; Oxidation/15.9949	1	b_hIgA-AR-GLTrFASP-FZpipHILIC_11mAbs_E2_step.raw_20240829_noglyc_spec_cut	464.68	1.4e-07	14900000	2	32.20	4	7,11	203	223	9.3e-07	354.3	354.3	1110.7165	1110.71	1.60	0	4438.83	17	2.11e+06	32.20	17-10554	HexNAc(5)Hex(3)Fuc(2)NeuAc(1)
68	2493; 2497; 22282; 42247; 61261; 61263; 62046	22.9500; 23.0000; 22.7200; 22.7700; 22.7300; 33.6600	6267; 6287; 6748; 6885; 6913; 6930; 11130	sp|P35527|K1C9_HUMAN Keratin, type I cytoskeletal 9 OS=Homo sapiens OX=9606 GN=KRT9 PE=1 SV=3	P35527	N	200	200	K.GPAAIQKnYSPYYNTIDDLK.D	HexNAc(3)Hex(4)Fuc(2)NeuAc(1)	Uncertain			SA	a	4110.7716; 4110.7727; 4110.7719; 4110.7763; 4110.7767; 4110.7759; 4110.7778	NGlycan/1840.6606	2	a_hIgA-SA-GLTrFASP-FZpipHILIC_E2_step.raw_20240829_noglyc_spec_cut; b_hIgA-SA-GLTrFASP-FZpipHILIC_E2_step.raw_20240829_noglyc_spec_cut; c_hIgA-SA-GLTrFASP-FZpipHILIC_E2_step.raw_20240829_noglyc_spec_cut; d_hIgA-SA-GLTrFASP-FZpipHILIC_E2_step.raw_20240829_noglyc_spec_cut	101.73	9.95e-01 - 1.00e+00		2	22.70 - 33.74	3	8	193	212	1.00e+00 - 1.00e+00	9.2 - 30.0	0.8 - 30.0	1371.2645; 1371.2648; 1371.2646; 1371.2661; 1371.2662; 1371.2659; 1371.2666	1371.27	-2.65; -2.39; -2.58; -1.51; -1.43; -1.62; -1.15	0 - 1	4110.78	1; 4; 7; 10	6.461e+05 - 4.614e+06	22.70 - 33.74	1; 4; 7; 10-6267	HexNAc(3)Hex(4)Fuc(2)NeuAc(1)
68.1	61261; 61263; 62046	22.7300; 22.7700; 33.6600	6913; 6930; 11130	sp|P35527|K1C9_HUMAN Keratin, type I cytoskeletal 9 OS=Homo sapiens OX=9606 GN=KRT9 PE=1 SV=3	P35527	N	200	200	K.GPAAIQKnYSPYYNTIDDLK.D	HexNAc(3)Hex(4)Fuc(2)NeuAc(1)	Uncertain			SA	d	4110.7767; 4110.7759; 4110.7778	NGlycan/1840.6606	1	d_hIgA-SA-GLTrFASP-FZpipHILIC_E2_step.raw_20240829_noglyc_spec_cut	101.73	9.95e-01 - 1.00e+00	48000000	2	33.74	3	8	193	212	1.00e+00 - 1.00e+00	9.2 - 11.2	9.2 - 11.2	1371.2662; 1371.2659; 1371.2666	1371.27	-1.43; -1.62; -1.15	0 - 1	4110.78	10	4.61e+06	33.74	10-6913	HexNAc(3)Hex(4)Fuc(2)NeuAc(1)
68.1.1	62046	33.6600	11130	sp|P35527|K1C9_HUMAN Keratin, type I cytoskeletal 9 OS=Homo sapiens OX=9606 GN=KRT9 PE=1 SV=3	P35527	N	200	200	K.GPAAIQKnYSPYYNTIDDLK.D	HexNAc(3)Hex(4)Fuc(2)NeuAc(1)	Uncertain			SA	d	4110.7778	NGlycan/1840.6606	0	d_hIgA-SA-GLTrFASP-FZpipHILIC_E2_step.raw_20240829_noglyc_spec_cut	101.73	1	48000000	2	33.74	3	8	193	212	1	10.2	10.2	1371.2666	1371.27	-1.15	0	4110.78	10	4.61e+06	33.74	10-11130	HexNAc(3)Hex(4)Fuc(2)NeuAc(1)
69	101458; 102021; 134583	33.5500; 38.6700; 36.1400	11061; 12944; 11534	sp|P35527|K1C9_HUMAN Keratin, type I cytoskeletal 9 OS=Homo sapiens OX=9606 GN=KRT9 PE=1 SV=3	P35527	N	200	200	K.GPAAIQKnYSPYYNTIDDLK.D	HexNAc(5)Hex(5)Fuc(1)NeuAc(2)	Uncertain			AR	b	4824.0189; 4824.0340; 4824.0161	NGlycan/2553.9097	2	b_hIgA-AR-GLTrFASP-FZpipHILIC_11mAbs_E2_step.raw_20240829_noglyc_spec_cut; d_hIgA-AR-GLTrFASP-FZpipHILIC_16mAbs_E2_step.raw_20240829_noglyc_spec_cut	120.55	9.95e-01 - 1.00e+00		2	34.26 - 36.10	4	8	193	212	9.99e-01 - 1.00e+00	13.8 - 49.4	10.0 - 13.8	1207.0120; 1207.0158; 1207.0113	1207.02	-2.64; 0.50; -3.23	0	4824.03	17; 23	7.229e+06 - 1.160e+07	34.26 - 36.10	17; 23-11061	HexNAc(5)Hex(5)Fuc(1)NeuAc(2)
69.1	101458; 102021	33.5500; 38.6700	11061; 12944	sp|P35527|K1C9_HUMAN Keratin, type I cytoskeletal 9 OS=Homo sapiens OX=9606 GN=KRT9 PE=1 SV=3	P35527	N	200	200	K.GPAAIQKnYSPYYNTIDDLK.D	HexNAc(5)Hex(5)Fuc(1)NeuAc(2)	Uncertain			AR	b	4824.0189; 4824.0340	NGlycan/2553.9097	1	b_hIgA-AR-GLTrFASP-FZpipHILIC_11mAbs_E2_step.raw_20240829_noglyc_spec_cut	120.55	9.95e-01 - 1.00e+00	257000000	2	34.26	4	8	193	212	9.99e-01 - 1.00e+00	37.6 - 49.4	10.0 - 12.7	1207.0120; 1207.0158	1207.02	-2.64; 0.50	0	4824.03	17	7.23e+06	34.26	17-11061	HexNAc(5)Hex(5)Fuc(1)NeuAc(2)
70	3238; 3432; 23237; 42926; 43257; 43263	32.9700; 34.9800; 35.1700; 31.9900; 35.1500; 35.2000	10101; 10869; 11459; 10355; 11535; 11556	sp|P0DOX4|IGE_HUMAN Immunoglobulin epsilon heavy chain OS=Homo sapiens OX=9606 PE=1 SV=1	P0DOX4	N,N	371,383	383	K.GTVnLTWSRASGKPVnHSTR.K	HexNAc(5)Hex(5)NeuAc(2)	Uncertain			SA	a	4575.9477; 4575.9719; 4575.9551; 4575.9707; 4575.9531; 4575.9520	Deamidated/0.9840; NGlycan/2407.8518	2	a_hIgA-SA-GLTrFASP-FZpipHILIC_E2_step.raw_20240829_noglyc_spec_cut; b_hIgA-SA-GLTrFASP-FZpipHILIC_E2_step.raw_20240829_noglyc_spec_cut; c_hIgA-SA-GLTrFASP-FZpipHILIC_E2_step.raw_20240829_noglyc_spec_cut	150.32	1.00e+00 - 1.00e+00		0	34.91 - 35.11	4	4,16	368	387	1.00e+00 - 1.00e+00	9.7 - 34.5	7.5 - 34.5	1144.9942; 1145.0003; 1144.9960; 1144.9999; 1144.9955; 1144.9953	1145	-2.80; 2.50; -1.18; 2.23; -1.62; -1.84	0 - 1	4575.96	1; 4; 7	3.346e+05 - 4.530e+06	34.91 - 35.11	1; 4; 7-10101	HexNAc(5)Hex(5)NeuAc(2)
70.1	3238; 3432	32.9700; 34.9800	10101; 10869	sp|P0DOX4|IGE_HUMAN Immunoglobulin epsilon heavy chain OS=Homo sapiens OX=9606 PE=1 SV=1	P0DOX4	N,N	371,383	383	K.GTVnLTWSRASGKPVnHSTR.K	HexNAc(5)Hex(5)NeuAc(2)	Uncertain			SA	a	4575.9477; 4575.9719	Deamidated/0.9840; NGlycan/2407.8518	1	a_hIgA-SA-GLTrFASP-FZpipHILIC_E2_step.raw_20240829_noglyc_spec_cut	150.32	1.00e+00 - 1.00e+00	41100000	0	35.11	4	4,16	368	387	1.00e+00 - 1.00e+00	26.0 - 29.3	24.4 - 26.0	1144.9942; 1145.0003	1145	-2.80; 2.50	0 - 1	4575.96	1	4.53e+06	35.11	1-10101	HexNAc(5)Hex(5)NeuAc(2)
70.1.1	3432	34.9800	10869	sp|P0DOX4|IGE_HUMAN Immunoglobulin epsilon heavy chain OS=Homo sapiens OX=9606 PE=1 SV=1	P0DOX4	N,N	371,383	383	K.GTVnLTWSRASGKPVnHSTR.K	HexNAc(5)Hex(5)NeuAc(2)	Uncertain			SA	a	4575.9719	Deamidated/0.9840; NGlycan/2407.8518	0	a_hIgA-SA-GLTrFASP-FZpipHILIC_E2_step.raw_20240829_noglyc_spec_cut	150.32	1	41100000	0	35.11	4	4,16	368	387	1	29.3	24.4	1145.0003	1145	2.50	0	4575.96	1	4.53e+06	35.11	1-10869	HexNAc(5)Hex(5)NeuAc(2)
71	85880; 102082	39.5600; 39.2100	12370; 13141	sp|P01042|KNG1_HUMAN Kininogen-1 OS=Homo sapiens OX=9606 GN=KNG1 PE=1 SV=2	P01042	Q,N	165,169	169	R.HGIqYFNnNTQHSSLFMLNEVK.R	HexNAc(5)Hex(6)NeuAc(3)	Uncertain			AR	a	5482.2337; 5482.2439	Deamidated/0.9840; NGlycan/2861.0001	2	a_hIgA-AR-GLTrFASP-FZpipHILIC_8mAbs_E2_step.raw_20240829_noglyc_spec_cut; b_hIgA-AR-GLTrFASP-FZpipHILIC_11mAbs_E2_step.raw_20240829_noglyc_spec_cut	207.65	3.98e-03 - 2.90e-02		0	39.32 - 39.62	4	4,8	162	183	2.58e-02 - 1.59e-01	127.6 - 194.9	0.0	1371.5657; 1371.5683	1371.57	0.06; 1.94	-1 - 0	5482.23	14; 17	2.771e+05 - 4.043e+05	39.32 - 39.62	14; 17-12370	HexNAc(5)Hex(6)NeuAc(3)
71.1	85880	39.5600	12370	sp|P01042|KNG1_HUMAN Kininogen-1 OS=Homo sapiens OX=9606 GN=KNG1 PE=1 SV=2	P01042	Q,N	165,169	169	R.HGIqYFNnNTQHSSLFMLNEVK.R	HexNAc(5)Hex(6)NeuAc(3)	Uncertain			AR	a	5482.2337	Deamidated/0.9840; NGlycan/2861.0001	1	a_hIgA-AR-GLTrFASP-FZpipHILIC_8mAbs_E2_step.raw_20240829_noglyc_spec_cut	207.65	0.029	4450000	0	39.62	4	4,8	162	183	0.16	194.9	0.0	1371.5657	1371.57	0.06	0	5482.23	14	4.04e+05	39.62	14-12370	HexNAc(5)Hex(6)NeuAc(3)
71.2	102082	39.2100	13141	sp|P01042|KNG1_HUMAN Kininogen-1 OS=Homo sapiens OX=9606 GN=KNG1 PE=1 SV=2	P01042	Q,N	165,169	169	R.HGIqYFNnNTQHSSLFMLNEVK.R	HexNAc(5)Hex(6)NeuAc(3)	Uncertain			AR	b	5482.2439	Deamidated/0.9840; NGlycan/2861.0001	1	b_hIgA-AR-GLTrFASP-FZpipHILIC_11mAbs_E2_step.raw_20240829_noglyc_spec_cut	127.55	0.004	2500000	0	39.32	4	4,8	162	183	0.026	127.6	0.0	1371.5683	1371.57	1.94	-1	5482.23	17	2.77e+05	39.32	17-13141	HexNAc(5)Hex(6)NeuAc(3)
72	118641	36.0600	12062	sp|P01042|KNG1_HUMAN Kininogen-1 OS=Homo sapiens OX=9606 GN=KNG1 PE=1 SV=2	P01042	N,N,M	168,169,178	169	R.HGIQYFnnNTQHSSLFmLNEVK.R	HexNAc(3)Hex(7)NeuAc(1)Phospho(1)	Uncertain			AR	c	4767.8851	Deamidated/0.9840; NGlycan/2114.6696; Dioxidation/31.9898	1	c_hIgA-AR-GLTrFASP-FZpipHILIC_16mAbs_E2_step.raw_20240829_noglyc_spec_cut	107.68	1	5960000	0	35.88	4	7,8,17	162	183	1	88.7	7.0	1192.9785	1192.98	-1.61	-1	4767.89	20	5.66e+05	35.88	20-12062	HexNAc(3)Hex(7)NeuAc(1)Phospho(1)
73	85330; 85380; 92438; 101598; 101640; 118359; 118469; 118474; 134380	34.9400; 35.2400; 34.5000; 34.8700; 35.1400; 33.4400; 34.7200; 34.7500	10699; 10811; 10776; 11553; 11651; 11128; 11590; 11600; 11000	sp|P01042|KNG1_HUMAN Kininogen-1 OS=Homo sapiens OX=9606 GN=KNG1 PE=1 SV=2	P01042	N,N,M	168,169,178	169	R.HGIQYFnnNTQHSSLFmLNEVK.R	HexNAc(6)Hex(4)NeuAc(1)	Uncertain			AR	a	4795.0231; 4795.0183; 4795.0135; 4795.0216; 4795.0199; 4795.0182; 4795.0228; 4795.0228; 4795.0272	Deamidated/0.9840; NGlycan/2157.7829; Oxidation/15.9949	2	a_hIgA-AR-GLTrFASP-FZpipHILIC_8mAbs_E2_step.raw_20240829_noglyc_spec_cut; a_hIgA-AR-GLTrFASP-FZpipHILIC_39mAbs_E1_step.raw_20240829_noglyc_spec_cut; b_hIgA-AR-GLTrFASP-FZpipHILIC_11mAbs_E2_step.raw_20240829_noglyc_spec_cut; c_hIgA-AR-GLTrFASP-FZpipHILIC_16mAbs_E2_step.raw_20240829_noglyc_spec_cut; d_hIgA-AR-GLTrFASP-FZpipHILIC_16mAbs_E2_step.raw_20240829_noglyc_spec_cut	262.19	2.56e-03 - 4.89e-01		0	34.06 - 35.31	4	7,8,17	162	183	1.68e-02 - 8.93e-01	1.5 - 71.1	0.1 - 17.7	1199.7630; 1199.7619; 1199.7606; 1199.7627; 1199.7623; 1199.7618; 1199.7630; 1199.7630; 1199.7641	1199.76	2.49; 1.49; 0.49; 2.18; 1.83; 1.48; 2.43; 2.42; 3.34	0 - 1	4795.01	14; 15; 17; 20; 23	0.000e+00 - 3.040e+05	34.06 - 35.31	14; 15; 17; 20; 23-10699	HexNAc(6)Hex(4)NeuAc(1)
73.1	85330; 85380	34.9400; 35.2400	10699; 10811	sp|P01042|KNG1_HUMAN Kininogen-1 OS=Homo sapiens OX=9606 GN=KNG1 PE=1 SV=2	P01042	N,N,M	168,169,178	169	R.HGIQYFnnNTQHSSLFmLNEVK.R	HexNAc(6)Hex(4)NeuAc(1)	Uncertain			AR	a	4795.0231; 4795.0183	Deamidated/0.9840; NGlycan/2157.7829; Oxidation/15.9949	1	a_hIgA-AR-GLTrFASP-FZpipHILIC_8mAbs_E2_step.raw_20240829_noglyc_spec_cut	253.27	2.56e-03 - 3.51e-03	116000	0	35.31	4	7,8,17	162	183	1.68e-02 - 2.29e-02	2.0 - 39.7	2.0 - 17.6	1199.7630; 1199.7619	1199.76	2.49; 1.49	1	4795.01	14	2.01e+05	35.31	14-10699	HexNAc(6)Hex(4)NeuAc(1)
73.1.2	85380	35.2400	10811	sp|P01042|KNG1_HUMAN Kininogen-1 OS=Homo sapiens OX=9606 GN=KNG1 PE=1 SV=2	P01042	N,N,M	168,169,178	169	R.HGIQYFnnNTQHSSLFmLNEVK.R	HexNAc(6)Hex(4)NeuAc(1)	Uncertain			AR	a	4795.0183	Deamidated/0.9840; NGlycan/2157.7829; Oxidation/15.9949	0	a_hIgA-AR-GLTrFASP-FZpipHILIC_8mAbs_E2_step.raw_20240829_noglyc_spec_cut	243.63	0.0026	116000	0	35.31	4	7,8,17	162	183	0.017	2.0	2.0	1199.7619	1199.76	1.49	1	4795.01	14	2.01e+05	35.31	14-10811	HexNAc(6)Hex(4)NeuAc(1)
73.2	92438	34.5000	10776	sp|P01042|KNG1_HUMAN Kininogen-1 OS=Homo sapiens OX=9606 GN=KNG1 PE=1 SV=2	P01042	N,N,M	168,169,178	169	R.HGIQYFnnNTQHSSLFmLNEVK.R	HexNAc(6)Hex(4)NeuAc(1)	Uncertain			AR	a	4795.0135	Deamidated/0.9840; NGlycan/2157.7829; Oxidation/15.9949	1	a_hIgA-AR-GLTrFASP-FZpipHILIC_39mAbs_E1_step.raw_20240829_noglyc_spec_cut	262.19	0.025	0	0	34.38	4	7,8,17	162	183	0.11	34.4	17.3	1199.7606	1199.76	0.49	1	4795.01	15	0	34.38	15-10776	HexNAc(6)Hex(4)NeuAc(1)
73.3	101598; 101640	34.8700; 35.1400	11553; 11651	sp|P01042|KNG1_HUMAN Kininogen-1 OS=Homo sapiens OX=9606 GN=KNG1 PE=1 SV=2	P01042	N,N,M	168,169,178	169	R.HGIQYFnnNTQHSSLFmLNEVK.R	HexNAc(6)Hex(4)NeuAc(1)	Uncertain			AR	b	4795.0216; 4795.0199	Deamidated/0.9840; NGlycan/2157.7829; Oxidation/15.9949	1	b_hIgA-AR-GLTrFASP-FZpipHILIC_11mAbs_E2_step.raw_20240829_noglyc_spec_cut	242.17	9.65e-02 - 3.05e-01	244000	0	35.23	4	7,8,17	162	183	3.94e-01 - 7.26e-01	26.3 - 33.2	0.1 - 17.2	1199.7627; 1199.7623	1199.76	2.18; 1.83	0 - 1	4795.01	17	3.04e+05	35.23	17-11553	HexNAc(6)Hex(4)NeuAc(1)
73.3.2	101640	35.1400	11651	sp|P01042|KNG1_HUMAN Kininogen-1 OS=Homo sapiens OX=9606 GN=KNG1 PE=1 SV=2	P01042	N,N,M	168,169,178	169	R.HGIQYFnnNTQHSSLFmLNEVK.R	HexNAc(6)Hex(4)NeuAc(1)	Uncertain			AR	b	4795.0199	Deamidated/0.9840; NGlycan/2157.7829; Oxidation/15.9949	0	b_hIgA-AR-GLTrFASP-FZpipHILIC_11mAbs_E2_step.raw_20240829_noglyc_spec_cut	229.72	0.31	244000	0	35.23	4	7,8,17	162	183	0.73	26.3	0.1	1199.7623	1199.76	1.83	0	4795.01	17	3.04e+05	35.23	17-11651	HexNAc(6)Hex(4)NeuAc(1)
73.4	118359; 118469; 118474	33.4400; 34.7200; 34.7500	11128; 11590; 11600	sp|P01042|KNG1_HUMAN Kininogen-1 OS=Homo sapiens OX=9606 GN=KNG1 PE=1 SV=2	P01042	N,N,M	168,169,178	169	R.HGIQYFnnNTQHSSLFmLNEVK.R	HexNAc(6)Hex(4)NeuAc(1)	Uncertain			AR	c	4795.0182; 4795.0228; 4795.0228	Deamidated/0.9840; NGlycan/2157.7829; Oxidation/15.9949	1	c_hIgA-AR-GLTrFASP-FZpipHILIC_16mAbs_E2_step.raw_20240829_noglyc_spec_cut	253.98	3.80e-02 - 4.89e-01	220000	0	34.06	4	7,8,17	162	183	2.60e-01 - 8.93e-01	1.5 - 66.8	1.5 - 17.6	1199.7618; 1199.7630; 1199.7630	1199.76	1.48; 2.43; 2.42	1	4795.01	20	8.29e+04	34.06	20-11128	HexNAc(6)Hex(4)NeuAc(1)
73.4.2	118469	34.7200	11590	sp|P01042|KNG1_HUMAN Kininogen-1 OS=Homo sapiens OX=9606 GN=KNG1 PE=1 SV=2	P01042	N,N,M	168,169,178	169	R.HGIQYFnnNTQHSSLFmLNEVK.R	HexNAc(6)Hex(4)NeuAc(1)	Uncertain			AR	c	4795.0228	Deamidated/0.9840; NGlycan/2157.7829; Oxidation/15.9949	0	c_hIgA-AR-GLTrFASP-FZpipHILIC_16mAbs_E2_step.raw_20240829_noglyc_spec_cut	248.89	0.11	220000	0	34.06	4	7,8,17	162	183	0.53	66.8	17.6	1199.7630	1199.76	2.43	1	4795.01	20	8.29e+04	34.06	20-11590	HexNAc(6)Hex(4)NeuAc(1)
73.4.3	118474	34.7500	11600	sp|P01042|KNG1_HUMAN Kininogen-1 OS=Homo sapiens OX=9606 GN=KNG1 PE=1 SV=2	P01042	N,N,M	168,169,178	169	R.HGIQYFnnNTQHSSLFmLNEVK.R	HexNAc(6)Hex(4)NeuAc(1)	Uncertain			AR	c	4795.0228	Deamidated/0.9840; NGlycan/2157.7829; Oxidation/15.9949	0	c_hIgA-AR-GLTrFASP-FZpipHILIC_16mAbs_E2_step.raw_20240829_noglyc_spec_cut	253.98	0.038	220000	0	34.06	4	7,8,17	162	183	0.26	47.8	17.4	1199.7630	1199.76	2.42	1	4795.01	20	8.29e+04	34.06	20-11600	HexNAc(6)Hex(4)NeuAc(1)
73.5	134380	34.7200	11000	sp|P01042|KNG1_HUMAN Kininogen-1 OS=Homo sapiens OX=9606 GN=KNG1 PE=1 SV=2	P01042	N,N,M	168,169,178	169	R.HGIQYFnnNTQHSSLFmLNEVK.R	HexNAc(6)Hex(4)NeuAc(1)	Uncertain			AR	d	4795.0272	Deamidated/0.9840; NGlycan/2157.7829; Oxidation/15.9949	1	d_hIgA-AR-GLTrFASP-FZpipHILIC_16mAbs_E2_step.raw_20240829_noglyc_spec_cut	252.83	0.058	0	0	34.61	4	7,8,17	162	183	0.26	71.1	17.7	1199.7641	1199.76	3.34	1	4795.01	23	0	34.61	23-11000	HexNAc(6)Hex(4)NeuAc(1)
75	85526; 101527	36.2200; 34.2800	11169; 11330	sp|P01042|KNG1_HUMAN Kininogen-1 OS=Homo sapiens OX=9606 GN=KNG1 PE=1 SV=2	P01042	N,Q	169,172	169	R.HGIQYFNnNTqHSSLFMLNEVK.R	HexNAc(4)Hex(5)NeuAc(2)	Uncertain			AR	a	4825.9936; 4826.0284	NGlycan/2204.7724; Deamidated/0.9840	2	a_hIgA-AR-GLTrFASP-FZpipHILIC_8mAbs_E2_step.raw_20240829_noglyc_spec_cut; b_hIgA-AR-GLTrFASP-FZpipHILIC_11mAbs_E2_step.raw_20240829_noglyc_spec_cut	194.32	1.94e-01 - 3.79e-01		0	34.26 - 36.42	4	8,11	162	183	5.93e-01 - 7.92e-01	143.0 - 194.3	0.0 - 2.9	1207.5057; 1207.5144	1207.51	-2.51; 4.70	-1 - 0	4826.01	14; 17	5.636e+05 - 2.511e+06	34.26 - 36.42	14; 17-11169	HexNAc(4)Hex(5)NeuAc(2)
75.1	85526	36.2200	11169	sp|P01042|KNG1_HUMAN Kininogen-1 OS=Homo sapiens OX=9606 GN=KNG1 PE=1 SV=2	P01042	N,Q	169,172	169	R.HGIQYFNnNTqHSSLFMLNEVK.R	HexNAc(4)Hex(5)NeuAc(2)	Uncertain			AR	a	4825.9936	NGlycan/2204.7724; Deamidated/0.9840	1	a_hIgA-AR-GLTrFASP-FZpipHILIC_8mAbs_E2_step.raw_20240829_noglyc_spec_cut	193.58	0.38	2070000	0	36.42	4	8,11	162	183	0.79	143.0	0.0	1207.5057	1207.51	-2.51	0	4826.01	14	5.64e+05	36.42	14-11169	HexNAc(4)Hex(5)NeuAc(2)
75.2	101527	34.2800	11330	sp|P01042|KNG1_HUMAN Kininogen-1 OS=Homo sapiens OX=9606 GN=KNG1 PE=1 SV=2	P01042	N,Q	169,172	169	R.HGIQYFNnNTqHSSLFMLNEVK.R	HexNAc(4)Hex(5)NeuAc(2)	Uncertain			AR	b	4826.0284	NGlycan/2204.7724; Deamidated/0.9840	1	b_hIgA-AR-GLTrFASP-FZpipHILIC_11mAbs_E2_step.raw_20240829_noglyc_spec_cut	194.32	0.19	21600000	0	34.26	4	8,11	162	183	0.59	194.3	2.9	1207.5144	1207.51	4.70	-1	4826.01	17	2.51e+06	34.26	17-11330	HexNAc(4)Hex(5)NeuAc(2)
76	118967	39.4900	13285	sp|P01042|KNG1_HUMAN Kininogen-1 OS=Homo sapiens OX=9606 GN=KNG1 PE=1 SV=2	P01042	N,Q	169,172	169	R.HGIQYFNnNTqHSSLFMLNEVK.R	HexNAc(5)Hex(6)Fuc(1)NeuAc(3)	Uncertain			AR	c	5628.2950	NGlycan/3007.0580; Deamidated/0.9840	1	c_hIgA-AR-GLTrFASP-FZpipHILIC_16mAbs_E2_step.raw_20240829_noglyc_spec_cut	176.44	0.00019	230000	0	39.43	4	8,11	162	183	0.0019	176.4	0.0	1408.0810	1408.08	0.68	0	5628.29	20	6.15e+04	39.43	20-13285	HexNAc(5)Hex(6)Fuc(1)NeuAc(3)
77	85036; 101301; 134043	32.4500; 32.3700; 32.1500	9760; 10610; 10020	sp|P01042|KNG1_HUMAN Kininogen-1 OS=Homo sapiens OX=9606 GN=KNG1 PE=1 SV=2	P01042	N,Q,M	169,172,178	169	R.HGIQYFNnNTqHSSLFmLNEVK.R	HexNAc(2)Hex(6)Phospho(1)	Uncertain			AR	a	4111.6564; 4111.6570; 4111.6581	NGlycan/1458.4420; Deamidated/0.9840; Dioxidation/31.9898	2	a_hIgA-AR-GLTrFASP-FZpipHILIC_8mAbs_E2_step.raw_20240829_noglyc_spec_cut; b_hIgA-AR-GLTrFASP-FZpipHILIC_11mAbs_E2_step.raw_20240829_noglyc_spec_cut; d_hIgA-AR-GLTrFASP-FZpipHILIC_16mAbs_E2_step.raw_20240829_noglyc_spec_cut	191.49	7.65e-01 - 9.93e-01		0	32.24 - 32.59	3	8,11,17	162	183	9.48e-01 - 9.99e-01	95.9 - 139.1	2.8 - 17.8	1371.5594; 1371.5596; 1371.5600	1371.56	-2.13; -1.98; -1.70	-1	4111.67	14; 17; 23	7.428e+06 - 1.109e+07	32.24 - 32.59	14; 17; 23-9760	HexNAc(2)Hex(6)Phospho(1)
77.1	85036	32.4500	9760	sp|P01042|KNG1_HUMAN Kininogen-1 OS=Homo sapiens OX=9606 GN=KNG1 PE=1 SV=2	P01042	N,Q,M	169,172,178	169	R.HGIQYFNnNTqHSSLFmLNEVK.R	HexNAc(2)Hex(6)Phospho(1)	Uncertain			AR	a	4111.6564	NGlycan/1458.4420; Deamidated/0.9840; Dioxidation/31.9898	1	a_hIgA-AR-GLTrFASP-FZpipHILIC_8mAbs_E2_step.raw_20240829_noglyc_spec_cut	171.17	0.94	86400000	0	32.59	3	8,11,17	162	183	0.99	116.0	6.7	1371.5594	1371.56	-2.13	-1	4111.67	14	9.67e+06	32.59	14-9760	HexNAc(2)Hex(6)Phospho(1)
77.2	101301	32.3700	10610	sp|P01042|KNG1_HUMAN Kininogen-1 OS=Homo sapiens OX=9606 GN=KNG1 PE=1 SV=2	P01042	N,Q,M	169,172,178	169	R.HGIQYFNnNTqHSSLFmLNEVK.R	HexNAc(2)Hex(6)Phospho(1)	Uncertain			AR	b	4111.6570	NGlycan/1458.4420; Deamidated/0.9840; Dioxidation/31.9898	1	b_hIgA-AR-GLTrFASP-FZpipHILIC_11mAbs_E2_step.raw_20240829_noglyc_spec_cut	153.01	0.99	73700000	0	32.51	3	8,11,17	162	183	1	95.9	2.8	1371.5596	1371.56	-1.98	-1	4111.67	17	1.11e+07	32.51	17-10610	HexNAc(2)Hex(6)Phospho(1)
77.3	134043	32.1500	10020	sp|P01042|KNG1_HUMAN Kininogen-1 OS=Homo sapiens OX=9606 GN=KNG1 PE=1 SV=2	P01042	N,Q,M	169,172,178	169	R.HGIQYFNnNTqHSSLFmLNEVK.R	HexNAc(2)Hex(6)Phospho(1)	Uncertain			AR	d	4111.6581	NGlycan/1458.4420; Deamidated/0.9840; Dioxidation/31.9898	1	d_hIgA-AR-GLTrFASP-FZpipHILIC_16mAbs_E2_step.raw_20240829_noglyc_spec_cut	191.49	0.77	72500000	0	32.24	3	8,11,17	162	183	0.95	139.1	17.8	1371.5600	1371.56	-1.70	-1	4111.67	23	7.43e+06	32.24	23-10020	HexNAc(2)Hex(6)Phospho(1)
78	85475; 85522; 118607	35.8500; 36.2000; 35.7700	11039; 11162; 11961	sp|P01042|KNG1_HUMAN Kininogen-1 OS=Homo sapiens OX=9606 GN=KNG1 PE=1 SV=2	P01042	N,Q,M	169,172,178	169	R.HGIQYFNnNTqHSSLFmLNEVK.R	HexNAc(3)Hex(7)NeuAc(1)Phospho(1)	Uncertain			AR	a	4767.8854; 4767.8875; 4767.8839	NGlycan/2114.6696; Deamidated/0.9840; Dioxidation/31.9898	2	a_hIgA-AR-GLTrFASP-FZpipHILIC_8mAbs_E2_step.raw_20240829_noglyc_spec_cut; c_hIgA-AR-GLTrFASP-FZpipHILIC_16mAbs_E2_step.raw_20240829_noglyc_spec_cut	143.08	8.75e-01 - 1.00e+00		0	35.88 - 35.90	4	8,11,17	162	183	9.77e-01 - 1.00e+00	10.1 - 98.7	0.0 - 7.4	1192.9786; 1192.9792; 1192.9783	1192.98	-1.53; -1.09; -1.85	-1	4767.89	14; 20	5.664e+05 - 1.560e+06	35.88 - 35.90	14; 20-11039	HexNAc(3)Hex(7)NeuAc(1)Phospho(1)
78.1	85475; 85522	35.8500; 36.2000	11039; 11162	sp|P01042|KNG1_HUMAN Kininogen-1 OS=Homo sapiens OX=9606 GN=KNG1 PE=1 SV=2	P01042	N,Q,M	169,172,178	169	R.HGIQYFNnNTqHSSLFmLNEVK.R	HexNAc(3)Hex(7)NeuAc(1)Phospho(1)	Uncertain			AR	a	4767.8854; 4767.8875	NGlycan/2114.6696; Deamidated/0.9840; Dioxidation/31.9898	1	a_hIgA-AR-GLTrFASP-FZpipHILIC_8mAbs_E2_step.raw_20240829_noglyc_spec_cut	127.87	8.75e-01 - 9.77e-01	19700000	0	35.90	4	8,11,17	162	183	9.77e-01 - 9.96e-01	10.1 - 98.7	0.0 - 7.4	1192.9786; 1192.9792	1192.98	-1.53; -1.09	-1	4767.89	14	1.56e+06	35.90	14-11039	HexNAc(3)Hex(7)NeuAc(1)Phospho(1)
78.1.2	85522	36.2000	11162	sp|P01042|KNG1_HUMAN Kininogen-1 OS=Homo sapiens OX=9606 GN=KNG1 PE=1 SV=2	P01042	N,Q,M	169,172,178	169	R.HGIQYFNnNTqHSSLFmLNEVK.R	HexNAc(3)Hex(7)NeuAc(1)Phospho(1)	Uncertain			AR	a	4767.8875	NGlycan/2114.6696; Deamidated/0.9840; Dioxidation/31.9898	0	a_hIgA-AR-GLTrFASP-FZpipHILIC_8mAbs_E2_step.raw_20240829_noglyc_spec_cut	127.87	0.98	19700000	0	35.90	4	8,11,17	162	183	1	98.7	7.4	1192.9792	1192.98	-1.09	-1	4767.89	14	1.56e+06	35.90	14-11162	HexNAc(3)Hex(7)NeuAc(1)Phospho(1)
78.2	118607	35.7700	11961	sp|P01042|KNG1_HUMAN Kininogen-1 OS=Homo sapiens OX=9606 GN=KNG1 PE=1 SV=2	P01042	N,Q,M	169,172,178	169	R.HGIQYFNnNTqHSSLFmLNEVK.R	HexNAc(3)Hex(7)NeuAc(1)Phospho(1)	Uncertain			AR	c	4767.8839	NGlycan/2114.6696; Deamidated/0.9840; Dioxidation/31.9898	1	c_hIgA-AR-GLTrFASP-FZpipHILIC_16mAbs_E2_step.raw_20240829_noglyc_spec_cut	143.08	1	5960000	0	35.88	4	8,11,17	162	183	1	72.4	0.0	1192.9783	1192.98	-1.85	-1	4767.89	20	5.66e+05	35.88	20-11961	HexNAc(3)Hex(7)NeuAc(1)Phospho(1)
79	134129	32.8200	10276	sp|P01042|KNG1_HUMAN Kininogen-1 OS=Homo sapiens OX=9606 GN=KNG1 PE=1 SV=2	P01042	N,Q,M	169,172,178	169	R.HGIQYFNnNTqHSSLFmLNEVK.R	HexNAc(6)Hex(4)NeuAc(1)	Uncertain			AR	d	4795.0268	NGlycan/2157.7829; Deamidated/0.9840; Oxidation/15.9949	1	d_hIgA-AR-GLTrFASP-FZpipHILIC_16mAbs_E2_step.raw_20240829_noglyc_spec_cut	280.35	0.00055	9840000	0	32.88	4	8,11,17	162	183	0.0038	65.6	0.0	1199.7640	1199.76	3.27	0	4795.01	23	1.41e+06	32.88	23-10276	HexNAc(6)Hex(4)NeuAc(1)
80	101771	36.1000	12002	sp|P01042|KNG1_HUMAN Kininogen-1 OS=Homo sapiens OX=9606 GN=KNG1 PE=1 SV=2	P01042	N,M	169,178	169	R.HGIQYFNnNTQHSSLFmLNEVK.R	HexNAc(3)Hex(7)NeuAc(1)Phospho(1)	Uncertain			AR	b	4766.8862	NGlycan/2114.6696; Dioxidation/31.9898	1	b_hIgA-AR-GLTrFASP-FZpipHILIC_11mAbs_E2_step.raw_20240829_noglyc_spec_cut	146.97	0.99	47400000	2	35.90	4	8,17	162	183	1	113.9	22.8	1192.7288	1192.73	-4.73	0	4766.91	17	3.36e+06	35.90	17-12002	HexNAc(3)Hex(7)NeuAc(1)Phospho(1)
81	16090; 74582; 81736; 85073; 85078; 85119; 85132; 92404; 100651; 101330; 101373; 118254; 118266; 118280; 118314; 118357; 130537; 130538; 134050; 134084; 134105	25.7700; 25.2200; 31.6700; 32.7000; 32.7400; 33.0400; 33.1300; 31.9900; 26.2200; 32.5900; 32.8800; 32.3900; 32.5400; 32.6900; 33.0000; 33.4100; 31.6400; 31.7000; 32.1900; 32.4800; 32.6500	9091; 8019; 9538; 9858; 9877; 9989; 10024; 9806; 8229; 10694; 10807; 10737; 10794; 10850; 10964; 11120; 9510; 9535; 10033; 10145; 10209	sp|P01042|KNG1_HUMAN Kininogen-1 OS=Homo sapiens OX=9606 GN=KNG1 PE=1 SV=2	P01042	N,M	169,178	169	R.HGIQYFNnNTQHSSLFmLNEVK.R	HexNAc(6)Hex(4)NeuAc(1)	Uncertain			SA	b	4794.0084; 4794.0093; 4794.0327; 4794.0308; 4794.0342; 4794.0300; 4794.0275; 4794.0301; 4794.0089; 4794.0319; 4794.0315; 4794.0290; 4794.0315; 4794.0305; 4794.0297; 4794.0168; 4794.0293; 4794.0346; 4794.0317; 4794.0335; 4794.0324	NGlycan/2157.7829; Oxidation/15.9949	2	b_hIgA-SA-GLTrFASP-FZpipHILIC_E1_step.raw_20240829_noglyc_spec_cut; a_hIgA-SA-GLTrFASP-FZpipHILIC_E1_step.raw_20240829_noglyc_spec_cut; d_hIgA-AR-GLTrFASP-FZpipHILIC_217mAbs-Dil1-5_D_step.raw_20240829_noglyc_spec_cut; a_hIgA-AR-GLTrFASP-FZpipHILIC_8mAbs_E2_step.raw_20240829_noglyc_spec_cut; a_hIgA-AR-GLTrFASP-FZpipHILIC_39mAbs_E1_step.raw_20240829_noglyc_spec_cut; b_hIgA-AR-GLTrFASP-FZpipHILIC_11…	332.35	8.20e-05 - 1.00e+00		2	25.27 - 32.79	4	8,17	162	183	8.04e-04 - 1.00e+00	1.8 - 95.2	1.8 - 55.7	1199.5094; 1199.5096; 1199.5155; 1199.5150; 1199.5158; 1199.5148; 1199.5142; 1199.5148; 1199.5095; 1199.5153; 1199.5151; 1199.5145; 1199.5151; 1199.5149; 1199.5147; 1199.5115; 1199.5146; 1199.5159; 1199.5152; 1199.5157; 1199.5154	1199.51	-3.89; -3.71; 1.17; 0.77; 1.49; 0.60; 0.09; 0.61; -3.81; 1.01; 0.91; 0.39; 0.91; 0.70; 0.54; -2.16; 0.45; 1.57; 0.96; 1.34; 1.11	0 - 1	4794.03	3; 12; 13; 14; 15; 17; 20; 22; 23	4.739e+06 - 1.509e+08	25.27 - 32.79	3; 12; 13; 14; 15; 17; 20; 22; 23-9091	HexNAc(6)Hex(4)NeuAc(1)
81.1	81736	31.6700	9538	sp|P01042|KNG1_HUMAN Kininogen-1 OS=Homo sapiens OX=9606 GN=KNG1 PE=1 SV=2	P01042	N,M	169,178	169	R.HGIQYFNnNTQHSSLFmLNEVK.R	HexNAc(6)Hex(4)NeuAc(1)	Uncertain			AR	d	4794.0327	NGlycan/2157.7829; Oxidation/15.9949	1	d_hIgA-AR-GLTrFASP-FZpipHILIC_217mAbs-Dil1-5_D_step.raw_20240829_noglyc_spec_cut	258.46	0.00024	42300000	2	31.60	4	8,17	162	183	0.002	24.4	24.4	1199.5155	1199.51	1.17	1	4794.03	13	4.74e+06	31.60	13-9538	HexNAc(6)Hex(4)NeuAc(1)
81.2	85073; 85078; 85119; 85132	32.7000; 32.7400; 33.0400; 33.1300	9858; 9877; 9989; 10024	sp|P01042|KNG1_HUMAN Kininogen-1 OS=Homo sapiens OX=9606 GN=KNG1 PE=1 SV=2	P01042	N,M	169,178	169	R.HGIQYFNnNTQHSSLFmLNEVK.R	HexNAc(6)Hex(4)NeuAc(1)	Uncertain			AR	a	4794.0308; 4794.0342; 4794.0300; 4794.0275	NGlycan/2157.7829; Oxidation/15.9949	1	a_hIgA-AR-GLTrFASP-FZpipHILIC_8mAbs_E2_step.raw_20240829_noglyc_spec_cut	313.25	1.94e-04 - 2.06e-01	629000000	2	32.79	4	8,17	162	183	1.29e-03 - 6.18e-01	18.2 - 77.5	18.2 - 46.9	1199.5150; 1199.5158; 1199.5148; 1199.5142	1199.51	0.77; 1.49; 0.60; 0.09	1	4794.03	14	7.38e+07	32.79	14-9858	HexNAc(6)Hex(4)NeuAc(1)
81.2.2	85078	32.7400	9877	sp|P01042|KNG1_HUMAN Kininogen-1 OS=Homo sapiens OX=9606 GN=KNG1 PE=1 SV=2	P01042	N,M	169,178	169	R.HGIQYFNnNTQHSSLFmLNEVK.R	HexNAc(6)Hex(4)NeuAc(1)	Uncertain			AR	a	4794.0342	NGlycan/2157.7829; Oxidation/15.9949	0	a_hIgA-AR-GLTrFASP-FZpipHILIC_8mAbs_E2_step.raw_20240829_noglyc_spec_cut	282.94	0.00099	629000000	2	32.79	4	8,17	162	183	0.0065	46.9	46.9	1199.5158	1199.51	1.49	1	4794.03	14	7.38e+07	32.79	14-9877	HexNAc(6)Hex(4)NeuAc(1)
81.2.3	85119	33.0400	9989	sp|P01042|KNG1_HUMAN Kininogen-1 OS=Homo sapiens OX=9606 GN=KNG1 PE=1 SV=2	P01042	N,M	169,178	169	R.HGIQYFNnNTQHSSLFmLNEVK.R	HexNAc(6)Hex(4)NeuAc(1)	Uncertain			AR	a	4794.0300	NGlycan/2157.7829; Oxidation/15.9949	0	a_hIgA-AR-GLTrFASP-FZpipHILIC_8mAbs_E2_step.raw_20240829_noglyc_spec_cut	208.37	0.21	629000000	2	32.79	4	8,17	162	183	0.62	18.2	18.2	1199.5148	1199.51	0.60	1	4794.03	14	7.38e+07	32.79	14-9989	HexNAc(6)Hex(4)NeuAc(1)
81.2.4	85132	33.1300	10024	sp|P01042|KNG1_HUMAN Kininogen-1 OS=Homo sapiens OX=9606 GN=KNG1 PE=1 SV=2	P01042	N,M	169,178	169	R.HGIQYFNnNTQHSSLFmLNEVK.R	HexNAc(6)Hex(4)NeuAc(1)	Uncertain			AR	a	4794.0275	NGlycan/2157.7829; Oxidation/15.9949	0	a_hIgA-AR-GLTrFASP-FZpipHILIC_8mAbs_E2_step.raw_20240829_noglyc_spec_cut	262.26	0.015	629000000	2	32.79	4	8,17	162	183	0.086	32.8	32.8	1199.5142	1199.51	0.09	1	4794.03	14	7.38e+07	32.79	14-10024	HexNAc(6)Hex(4)NeuAc(1)
81.3	100651; 101330; 101373	26.2200; 32.5900; 32.8800	8229; 10694; 10807	sp|P01042|KNG1_HUMAN Kininogen-1 OS=Homo sapiens OX=9606 GN=KNG1 PE=1 SV=2	P01042	N,M	169,178	169	R.HGIQYFNnNTQHSSLFmLNEVK.R	HexNAc(6)Hex(4)NeuAc(1)	Uncertain			AR	b	4794.0089; 4794.0319; 4794.0315	NGlycan/2157.7829; Oxidation/15.9949	1	b_hIgA-AR-GLTrFASP-FZpipHILIC_11mAbs_E2_step.raw_20240829_noglyc_spec_cut	308.56	1.32e-03 - 1.00e+00	570000000	2	26.07	4	8,17	162	183	8.66e-03 - 1.00e+00	4.7 - 74.5	4.7 - 28.1	1199.5095; 1199.5153; 1199.5151	1199.51	-3.81; 1.01; 0.91	0 - 1	4794.03	17	5.61e+07	26.07	17-8229	HexNAc(6)Hex(4)NeuAc(1)
81.3.1	101330	32.5900	10694	sp|P01042|KNG1_HUMAN Kininogen-1 OS=Homo sapiens OX=9606 GN=KNG1 PE=1 SV=2	P01042	N,M	169,178	169	R.HGIQYFNnNTQHSSLFmLNEVK.R	HexNAc(6)Hex(4)NeuAc(1)	Uncertain			AR	b	4794.0319	NGlycan/2157.7829; Oxidation/15.9949	0	b_hIgA-AR-GLTrFASP-FZpipHILIC_11mAbs_E2_step.raw_20240829_noglyc_spec_cut	308.56	0.0013	570000000	2	26.07	4	8,17	162	183	0.0087	74.5	28.1	1199.5153	1199.51	1.01	0	4794.03	17	5.61e+07	26.07	17-10694	HexNAc(6)Hex(4)NeuAc(1)
81.3.2	101373	32.8800	10807	sp|P01042|KNG1_HUMAN Kininogen-1 OS=Homo sapiens OX=9606 GN=KNG1 PE=1 SV=2	P01042	N,M	169,178	169	R.HGIQYFNnNTQHSSLFmLNEVK.R	HexNAc(6)Hex(4)NeuAc(1)	Uncertain			AR	b	4794.0315	NGlycan/2157.7829; Oxidation/15.9949	0	b_hIgA-AR-GLTrFASP-FZpipHILIC_11mAbs_E2_step.raw_20240829_noglyc_spec_cut	258.54	0.034	570000000	2	26.07	4	8,17	162	183	0.18	39.9	27.1	1199.5151	1199.51	0.91	1	4794.03	17	5.61e+07	26.07	17-10807	HexNAc(6)Hex(4)NeuAc(1)
81.4	118254; 118266; 118280; 118314; 118357	32.3900; 32.5400; 32.6900; 33.0000; 33.4100	10737; 10794; 10850; 10964; 11120	sp|P01042|KNG1_HUMAN Kininogen-1 OS=Homo sapiens OX=9606 GN=KNG1 PE=1 SV=2	P01042	N,M	169,178	169	R.HGIQYFNnNTQHSSLFmLNEVK.R	HexNAc(6)Hex(4)NeuAc(1)	Uncertain			AR	c	4794.0290; 4794.0315; 4794.0305; 4794.0297; 4794.0168	NGlycan/2157.7829; Oxidation/15.9949	1	c_hIgA-AR-GLTrFASP-FZpipHILIC_16mAbs_E2_step.raw_20240829_noglyc_spec_cut	324.63	8.20e-05 - 1.00e+00	174000000	2	32.46	4	8,17	162	183	8.04e-04 - 1.00e+00	5.1 - 95.2	2.9 - 27.6	1199.5145; 1199.5151; 1199.5149; 1199.5147; 1199.5115	1199.51	0.39; 0.91; 0.70; 0.54; -2.16	1	4794.03	20	1.71e+07	32.46	20-10737	HexNAc(6)Hex(4)NeuAc(1)
81.4.2	118266	32.5400	10794	sp|P01042|KNG1_HUMAN Kininogen-1 OS=Homo sapiens OX=9606 GN=KNG1 PE=1 SV=2	P01042	N,M	169,178	169	R.HGIQYFNnNTQHSSLFmLNEVK.R	HexNAc(6)Hex(4)NeuAc(1)	Uncertain			AR	c	4794.0315	NGlycan/2157.7829; Oxidation/15.9949	0	c_hIgA-AR-GLTrFASP-FZpipHILIC_16mAbs_E2_step.raw_20240829_noglyc_spec_cut	264.71	0.0015	174000000	2	32.46	4	8,17	162	183	0.014	49.1	26.1	1199.5151	1199.51	0.91	1	4794.03	20	1.71e+07	32.46	20-10794	HexNAc(6)Hex(4)NeuAc(1)
81.4.3	118280	32.6900	10850	sp|P01042|KNG1_HUMAN Kininogen-1 OS=Homo sapiens OX=9606 GN=KNG1 PE=1 SV=2	P01042	N,M	169,178	169	R.HGIQYFNnNTQHSSLFmLNEVK.R	HexNAc(6)Hex(4)NeuAc(1)	Uncertain			AR	c	4794.0305	NGlycan/2157.7829; Oxidation/15.9949	0	c_hIgA-AR-GLTrFASP-FZpipHILIC_16mAbs_E2_step.raw_20240829_noglyc_spec_cut	253.14	0.0027	174000000	2	32.46	4	8,17	162	183	0.026	23.2	23.2	1199.5149	1199.51	0.70	1	4794.03	20	1.71e+07	32.46	20-10850	HexNAc(6)Hex(4)NeuAc(1)
81.4.4	118314	33.0000	10964	sp|P01042|KNG1_HUMAN Kininogen-1 OS=Homo sapiens OX=9606 GN=KNG1 PE=1 SV=2	P01042	N,M	169,178	169	R.HGIQYFNnNTQHSSLFmLNEVK.R	HexNAc(6)Hex(4)NeuAc(1)	Uncertain			AR	c	4794.0297	NGlycan/2157.7829; Oxidation/15.9949	0	c_hIgA-AR-GLTrFASP-FZpipHILIC_16mAbs_E2_step.raw_20240829_noglyc_spec_cut	262.56	0.0019	174000000	2	32.46	4	8,17	162	183	0.018	64.8	22.2	1199.5147	1199.51	0.54	1	4794.03	20	1.71e+07	32.46	20-10964	HexNAc(6)Hex(4)NeuAc(1)
81.4.5	118357	33.4100	11120	sp|P01042|KNG1_HUMAN Kininogen-1 OS=Homo sapiens OX=9606 GN=KNG1 PE=1 SV=2	P01042	N,M	169,178	169	R.HGIQYFNnNTQHSSLFmLNEVK.R	HexNAc(6)Hex(4)NeuAc(1)	Uncertain			AR	c	4794.0168	NGlycan/2157.7829; Oxidation/15.9949	0	c_hIgA-AR-GLTrFASP-FZpipHILIC_16mAbs_E2_step.raw_20240829_noglyc_spec_cut	199.98	1	174000000	2	32.46	4	8,17	162	183	1	5.1	2.9	1199.5115	1199.51	-2.16	1	4794.03	20	1.71e+07	32.46	20-11120	HexNAc(6)Hex(4)NeuAc(1)
81.5	130537; 130538	31.6400; 31.7000	9510; 9535	sp|P01042|KNG1_HUMAN Kininogen-1 OS=Homo sapiens OX=9606 GN=KNG1 PE=1 SV=2	P01042	N,M	169,178	169	R.HGIQYFNnNTQHSSLFmLNEVK.R	HexNAc(6)Hex(4)NeuAc(1)	Uncertain			AR	c	4794.0293; 4794.0346	NGlycan/2157.7829; Oxidation/15.9949	1	c_hIgA-AR-GLTrFASP-FZpipHILIC_209mAbs-Dil1-5_D_step.raw_20240829_noglyc_spec_cut	290.56	1.92e-03 - 8.30e-03	66500000	2	31.63	4	8,17	162	183	1.56e-02 - 6.45e-02	18.1 - 23.5	18.1 - 23.0	1199.5146; 1199.5159	1199.51	0.45; 1.57	0 - 1	4794.03	22	7.34e+06	31.63	22-9510	HexNAc(6)Hex(4)NeuAc(1)
81.5.2	130538	31.7000	9535	sp|P01042|KNG1_HUMAN Kininogen-1 OS=Homo sapiens OX=9606 GN=KNG1 PE=1 SV=2	P01042	N,M	169,178	169	R.HGIQYFNnNTQHSSLFmLNEVK.R	HexNAc(6)Hex(4)NeuAc(1)	Uncertain			AR	c	4794.0346	NGlycan/2157.7829; Oxidation/15.9949	0	c_hIgA-AR-GLTrFASP-FZpipHILIC_209mAbs-Dil1-5_D_step.raw_20240829_noglyc_spec_cut	290.56	0.0019	66500000	2	31.63	4	8,17	162	183	0.016	18.1	18.1	1199.5159	1199.51	1.57	1	4794.03	22	7.34e+06	31.63	22-9535	HexNAc(6)Hex(4)NeuAc(1)
81.6	134050; 134084; 134105	32.1900; 32.4800; 32.6500	10033; 10145; 10209	sp|P01042|KNG1_HUMAN Kininogen-1 OS=Homo sapiens OX=9606 GN=KNG1 PE=1 SV=2	P01042	N,M	169,178	169	R.HGIQYFNnNTQHSSLFmLNEVK.R	HexNAc(6)Hex(4)NeuAc(1)	Uncertain			AR	d	4794.0317; 4794.0335; 4794.0324	NGlycan/2157.7829; Oxidation/15.9949	1	d_hIgA-AR-GLTrFASP-FZpipHILIC_16mAbs_E2_step.raw_20240829_noglyc_spec_cut	332.35	1.50e-04 - 4.17e-01	887000000	2	32.30	4	8,17	162	183	1.04e-03 - 8.00e-01	16.4 - 91.5	16.4 - 55.7	1199.5152; 1199.5157; 1199.5154	1199.51	0.96; 1.34; 1.11	1	4794.03	23	9.68e+07	32.30	23-10033	HexNAc(6)Hex(4)NeuAc(1)
81.6.2	134084	32.4800	10145	sp|P01042|KNG1_HUMAN Kininogen-1 OS=Homo sapiens OX=9606 GN=KNG1 PE=1 SV=2	P01042	N,M	169,178	169	R.HGIQYFNnNTQHSSLFmLNEVK.R	HexNAc(6)Hex(4)NeuAc(1)	Uncertain			AR	d	4794.0335	NGlycan/2157.7829; Oxidation/15.9949	0	d_hIgA-AR-GLTrFASP-FZpipHILIC_16mAbs_E2_step.raw_20240829_noglyc_spec_cut	306.23	0.0014	887000000	2	32.30	4	8,17	162	183	0.0098	55.7	55.7	1199.5157	1199.51	1.34	1	4794.03	23	9.68e+07	32.30	23-10145	HexNAc(6)Hex(4)NeuAc(1)
81.6.3	134105	32.6500	10209	sp|P01042|KNG1_HUMAN Kininogen-1 OS=Homo sapiens OX=9606 GN=KNG1 PE=1 SV=2	P01042	N,M	169,178	169	R.HGIQYFNnNTQHSSLFmLNEVK.R	HexNAc(6)Hex(4)NeuAc(1)	Uncertain			AR	d	4794.0324	NGlycan/2157.7829; Oxidation/15.9949	0	d_hIgA-AR-GLTrFASP-FZpipHILIC_16mAbs_E2_step.raw_20240829_noglyc_spec_cut	236.56	0.42	887000000	2	32.30	4	8,17	162	183	0.8	16.4	16.4	1199.5154	1199.51	1.11	1	4794.03	23	9.68e+07	32.30	23-10209	HexNAc(6)Hex(4)NeuAc(1)
82	85349	35.0400	10736	sp|P01042|KNG1_HUMAN Kininogen-1 OS=Homo sapiens OX=9606 GN=KNG1 PE=1 SV=2	P01042	N,M	169,178	169	R.HGIQYFNnNTQHSSLFmLNEVK.R	HexNAc(5)Hex(6)NeuAc(1)	Uncertain			AR	a	4915.0637	NGlycan/2278.8092; Oxidation/15.9949	1	a_hIgA-AR-GLTrFASP-FZpipHILIC_8mAbs_E2_step.raw_20240829_noglyc_spec_cut	186.88	0.29	14800000	2	35.03	4	8,17	162	183	0.72	111.7	0.9	1229.7732	1229.77	2.10	1	4915.05	14	1.34e+06	35.03	14-10736	HexNAc(5)Hex(6)NeuAc(1)
83	121127; 121128	35.1900; 35.2500	11753; 11777	sp|P01042|KNG1_HUMAN Kininogen-1 OS=Homo sapiens OX=9606 GN=KNG1 PE=1 SV=2	P01042	N,M	169,178	169	R.HGIQYFNnNTQHSSLFmLNEVK.R	HexNAc(4)Hex(5)NeuAc(2)Sulfo(1)	Uncertain			AR	c	4920.9779; 4920.9936	NGlycan/2284.7293; Oxidation/15.9949	2	c_hIgA-AR-GLTrFASP-FZpipHILIC_16mAbs_E2_step.raw_20240829_noglyc_spec_cut	186.38	6.94e-03 - 1.40e-01	6930000	2	35.18	4	8,17	162	183	1.40e-01 - 7.87e-01	50.3 - 55.4	50.3 - 55.4	1231.2517; 1231.2557	1231.25	0.90; 4.10	-1 - 0	4920.97	20	5.92e+05	35.18	20-11753	HexNAc(4)Hex(5)NeuAc(2)Sulfo(1)
84	118241	32.2800	10699	sp|P01042|KNG1_HUMAN Kininogen-1 OS=Homo sapiens OX=9606 GN=KNG1 PE=1 SV=2	P01042	N,M,N	169,178,180	169	R.HGIQYFNnNTQHSSLFmLnEVK.R	HexNAc(2)Hex(6)Phospho(1)	Uncertain			AR	c	4111.6585	NGlycan/1458.4420; Dioxidation/31.9898; Deamidated/0.9840	1	c_hIgA-AR-GLTrFASP-FZpipHILIC_16mAbs_E2_step.raw_20240829_noglyc_spec_cut	214.61	1	38800000	0	32.33	3	8,17,19	162	183	1	143.0	12.1	1371.5601	1371.56	-1.62	-1	4111.67	20	4.24e+06	32.33	20-10699	HexNAc(2)Hex(6)Phospho(1)
85	85039	32.4800	9772	sp|P01042|KNG1_HUMAN Kininogen-1 OS=Homo sapiens OX=9606 GN=KNG1 PE=1 SV=2	P01042	N,M,N	169,178,180	169	R.HGIQYFNnNTQHSSLFmLnEVK.R	HexNAc(2)Hex(6)Phospho(1)	Uncertain			AR	a	4111.6535	NGlycan/1458.4420; Dioxidation/31.9898; Deamidated/0.9840	1	a_hIgA-AR-GLTrFASP-FZpipHILIC_8mAbs_E2_step.raw_20240829_noglyc_spec_cut	102.67	0.91	21800000	0	32.57	4	8,17,19	162	183	0.98	69.4	1.5	1028.9207	1028.92	-2.82	-1	4111.67	14	3.45e+06	32.57	14-9772	HexNAc(2)Hex(6)Phospho(1)
86	85158; 85190; 101412; 118318; 134135	33.3300; 33.5800; 33.1500; 33.0200; 32.8700	10101; 10195; 10911; 10973; 10296	sp|P01042|KNG1_HUMAN Kininogen-1 OS=Homo sapiens OX=9606 GN=KNG1 PE=1 SV=2	P01042	N,M,N	169,178,180	169	R.HGIQYFNnNTQHSSLFmLnEVK.R	HexNAc(6)Hex(4)NeuAc(1)	Uncertain			AR	a	4795.0202; 4795.0321; 4795.0263; 4795.0237; 4795.0224	NGlycan/2157.7829; Oxidation/15.9949; Deamidated/0.9840	2	a_hIgA-AR-GLTrFASP-FZpipHILIC_8mAbs_E2_step.raw_20240829_noglyc_spec_cut; b_hIgA-AR-GLTrFASP-FZpipHILIC_11mAbs_E2_step.raw_20240829_noglyc_spec_cut; c_hIgA-AR-GLTrFASP-FZpipHILIC_16mAbs_E2_step.raw_20240829_noglyc_spec_cut; d_hIgA-AR-GLTrFASP-FZpipHILIC_16mAbs_E2_step.raw_20240829_noglyc_spec_cut	281.91	4.01e-03 - 9.12e-01		0	32.88 - 33.26	4	8,17,19	162	183	2.60e-02 - 9.84e-01	6.4 - 75.2	0.3 - 14.4	1199.7623; 1199.7653; 1199.7639; 1199.7632; 1199.7629	1199.76	1.88; 4.38; 3.17; 2.62; 2.34	-1 - 0	4795.01	14; 17; 20; 23	1.445e+05 - 1.413e+06	32.88 - 33.26	14; 17; 20; 23-10101	HexNAc(6)Hex(4)NeuAc(1)
86.1	85158; 85190	33.3300; 33.5800	10101; 10195	sp|P01042|KNG1_HUMAN Kininogen-1 OS=Homo sapiens OX=9606 GN=KNG1 PE=1 SV=2	P01042	N,M,N	169,178,180	169	R.HGIQYFNnNTQHSSLFmLnEVK.R	HexNAc(6)Hex(4)NeuAc(1)	Uncertain			AR	a	4795.0202; 4795.0321	NGlycan/2157.7829; Oxidation/15.9949; Deamidated/0.9840	1	a_hIgA-AR-GLTrFASP-FZpipHILIC_8mAbs_E2_step.raw_20240829_noglyc_spec_cut	198.73	1.60e-01 - 9.12e-01	14600000	0	33.26	4	8,17,19	162	183	5.43e-01 - 9.84e-01	8.6 - 71.3	1.5 - 14.4	1199.7623; 1199.7653	1199.76	1.88; 4.38	0	4795.01	14	1.33e+06	33.26	14-10101	HexNAc(6)Hex(4)NeuAc(1)
86.1.2	85190	33.5800	10195	sp|P01042|KNG1_HUMAN Kininogen-1 OS=Homo sapiens OX=9606 GN=KNG1 PE=1 SV=2	P01042	N,M,N	169,178,180	169	R.HGIQYFNnNTQHSSLFmLnEVK.R	HexNAc(6)Hex(4)NeuAc(1)	Uncertain			AR	a	4795.0321	NGlycan/2157.7829; Oxidation/15.9949; Deamidated/0.9840	0	a_hIgA-AR-GLTrFASP-FZpipHILIC_8mAbs_E2_step.raw_20240829_noglyc_spec_cut	186.01	0.91	14600000	0	33.26	4	8,17,19	162	183	0.98	8.6	1.5	1199.7653	1199.76	4.38	0	4795.01	14	1.33e+06	33.26	14-10195	HexNAc(6)Hex(4)NeuAc(1)
86.2	101412	33.1500	10911	sp|P01042|KNG1_HUMAN Kininogen-1 OS=Homo sapiens OX=9606 GN=KNG1 PE=1 SV=2	P01042	N,M,N	169,178,180	169	R.HGIQYFNnNTQHSSLFmLnEVK.R	HexNAc(6)Hex(4)NeuAc(1)	Uncertain			AR	b	4795.0263	NGlycan/2157.7829; Oxidation/15.9949; Deamidated/0.9840	1	b_hIgA-AR-GLTrFASP-FZpipHILIC_11mAbs_E2_step.raw_20240829_noglyc_spec_cut	281.22	0.004	6590000	0	33.13	4	8,17,19	162	183	0.026	75.2	0.3	1199.7639	1199.76	3.17	0	4795.01	17	9.58e+05	33.13	17-10911	HexNAc(6)Hex(4)NeuAc(1)
86.3	118318	33.0200	10973	sp|P01042|KNG1_HUMAN Kininogen-1 OS=Homo sapiens OX=9606 GN=KNG1 PE=1 SV=2	P01042	N,M,N	169,178,180	169	R.HGIQYFNnNTQHSSLFmLnEVK.R	HexNAc(6)Hex(4)NeuAc(1)	Uncertain			AR	c	4795.0237	NGlycan/2157.7829; Oxidation/15.9949; Deamidated/0.9840	1	c_hIgA-AR-GLTrFASP-FZpipHILIC_16mAbs_E2_step.raw_20240829_noglyc_spec_cut	281.91	0.098	238000	0	33.14	4	8,17,19	162	183	0.49	72.8	4.7	1199.7632	1199.76	2.62	-1	4795.01	20	1.45e+05	33.14	20-10973	HexNAc(6)Hex(4)NeuAc(1)
86.4	134135	32.8700	10296	sp|P01042|KNG1_HUMAN Kininogen-1 OS=Homo sapiens OX=9606 GN=KNG1 PE=1 SV=2	P01042	N,M,N	169,178,180	169	R.HGIQYFNnNTQHSSLFmLnEVK.R	HexNAc(6)Hex(4)NeuAc(1)	Uncertain			AR	d	4795.0224	NGlycan/2157.7829; Oxidation/15.9949; Deamidated/0.9840	1	d_hIgA-AR-GLTrFASP-FZpipHILIC_16mAbs_E2_step.raw_20240829_noglyc_spec_cut	235.51	0.015	9840000	0	32.88	4	8,17,19	162	183	0.085	6.4	6.4	1199.7629	1199.76	2.34	0	4795.01	23	1.41e+06	32.88	23-10296	HexNAc(6)Hex(4)NeuAc(1)
87	85498; 134535; 134559	36.0000; 35.7800; 35.9300	11093; 11405; 11458	sp|P01042|KNG1_HUMAN Kininogen-1 OS=Homo sapiens OX=9606 GN=KNG1 PE=1 SV=2	P01042	N,N,M	169,170,178	169	R.HGIQYFNnnTQHSSLFmLNEVK.R	HexNAc(3)Hex(7)NeuAc(1)Phospho(1)	Uncertain			AR	a	4767.8879; 4767.8832; 4767.8853	NGlycan/2114.6696; Deamidated/0.9840; Dioxidation/31.9898	2	a_hIgA-AR-GLTrFASP-FZpipHILIC_8mAbs_E2_step.raw_20240829_noglyc_spec_cut; d_hIgA-AR-GLTrFASP-FZpipHILIC_16mAbs_E2_step.raw_20240829_noglyc_spec_cut	177.22	7.54e-01 - 8.26e-01		0	35.90 - 35.96	4	8,9,17	162	183	9.45e-01 - 9.67e-01	105.6 - 133.9	0.0 - 5.3	1192.9793; 1192.9781; 1192.9786	1192.98	-1.01; -1.99; -1.56	-1	4767.89	14; 23	1.101e+06 - 1.560e+06	35.90 - 35.96	14; 23-11093	HexNAc(3)Hex(7)NeuAc(1)Phospho(1)
87.1	85498	36.0000	11093	sp|P01042|KNG1_HUMAN Kininogen-1 OS=Homo sapiens OX=9606 GN=KNG1 PE=1 SV=2	P01042	N,N,M	169,170,178	169	R.HGIQYFNnnTQHSSLFmLNEVK.R	HexNAc(3)Hex(7)NeuAc(1)Phospho(1)	Uncertain			AR	a	4767.8879	NGlycan/2114.6696; Deamidated/0.9840; Dioxidation/31.9898	1	a_hIgA-AR-GLTrFASP-FZpipHILIC_8mAbs_E2_step.raw_20240829_noglyc_spec_cut	122.76	0.83	19700000	0	35.90	4	8,9,17	162	183	0.97	105.6	5.3	1192.9793	1192.98	-1.01	-1	4767.89	14	1.56e+06	35.90	14-11093	HexNAc(3)Hex(7)NeuAc(1)Phospho(1)
87.2	134535; 134559	35.7800; 35.9300	11405; 11458	sp|P01042|KNG1_HUMAN Kininogen-1 OS=Homo sapiens OX=9606 GN=KNG1 PE=1 SV=2	P01042	N,N,M	169,170,178	169	R.HGIQYFNnnTQHSSLFmLNEVK.R	HexNAc(3)Hex(7)NeuAc(1)Phospho(1)	Uncertain			AR	d	4767.8832; 4767.8853	NGlycan/2114.6696; Deamidated/0.9840; Dioxidation/31.9898	1	d_hIgA-AR-GLTrFASP-FZpipHILIC_16mAbs_E2_step.raw_20240829_noglyc_spec_cut	177.22	7.54e-01 - 8.07e-01	18100000	0	35.96	4	8,9,17	162	183	9.45e-01 - 9.59e-01	129.6 - 133.9	0.0 - 2.6	1192.9781; 1192.9786	1192.98	-1.99; -1.56	-1	4767.89	23	1.1e+06	35.96	23-11405	HexNAc(3)Hex(7)NeuAc(1)Phospho(1)
87.2.2	134559	35.9300	11458	sp|P01042|KNG1_HUMAN Kininogen-1 OS=Homo sapiens OX=9606 GN=KNG1 PE=1 SV=2	P01042	N,N,M	169,170,178	169	R.HGIQYFNnnTQHSSLFmLNEVK.R	HexNAc(3)Hex(7)NeuAc(1)Phospho(1)	Uncertain			AR	d	4767.8853	NGlycan/2114.6696; Deamidated/0.9840; Dioxidation/31.9898	0	d_hIgA-AR-GLTrFASP-FZpipHILIC_16mAbs_E2_step.raw_20240829_noglyc_spec_cut	171.23	0.81	18100000	0	35.96	4	8,9,17	162	183	0.96	133.9	2.6	1192.9786	1192.98	-1.56	-1	4767.89	23	1.1e+06	35.96	23-11458	HexNAc(3)Hex(7)NeuAc(1)Phospho(1)
88	85665; 85683; 101918; 101924; 118784; 118792; 134702	37.5900; 37.7600; 37.5700; 37.6300; 37.5100; 37.6500; 37.5600	11672; 11736; 12537; 12561; 12576; 12625; 12073	sp|P01042|KNG1_HUMAN Kininogen-1 OS=Homo sapiens OX=9606 GN=KNG1 PE=1 SV=2	P01042	N,N,M	168,169,178	169	R.HGIQYFnnNTQHSSLFmLNEVKR.A	HexNAc(6)Hex(8)NeuAc(1)	Uncertain			AR	a	5599.3082; 5599.3101; 5599.3066; 5599.3126; 5599.3069; 5599.3131; 5599.3187	Deamidated/0.9840; NGlycan/2805.9942; Oxidation/15.9949	2	a_hIgA-AR-GLTrFASP-FZpipHILIC_8mAbs_E2_step.raw_20240829_noglyc_spec_cut; b_hIgA-AR-GLTrFASP-FZpipHILIC_11mAbs_E2_step.raw_20240829_noglyc_spec_cut; c_hIgA-AR-GLTrFASP-FZpipHILIC_16mAbs_E2_step.raw_20240829_noglyc_spec_cut; d_hIgA-AR-GLTrFASP-FZpipHILIC_16mAbs_E2_step.raw_20240829_noglyc_spec_cut	291.09	7.68e-01 - 1.00e+00		0	37.53 - 37.63	4	7,8,17	162	184	9.49e-01 - 1.00e+00	16.9 - 63.9	6.9 - 18.4	1400.8343; 1400.8348; 1400.8339; 1400.8354; 1400.8340; 1400.8356; 1400.8369	1400.84	-2.74; -2.39; -3.02; -1.96; -2.97; -1.86; -0.87	-1 - 0	5599.32	14; 17; 20; 23	4.200e+05 - 2.044e+06	37.53 - 37.63	14; 17; 20; 23-11672	HexNAc(6)Hex(8)NeuAc(1)
88.1	85665; 85683	37.5900; 37.7600	11672; 11736	sp|P01042|KNG1_HUMAN Kininogen-1 OS=Homo sapiens OX=9606 GN=KNG1 PE=1 SV=2	P01042	N,N,M	168,169,178	169	R.HGIQYFnnNTQHSSLFmLNEVKR.A	HexNAc(6)Hex(8)NeuAc(1)	Uncertain			AR	a	5599.3082; 5599.3101	Deamidated/0.9840; NGlycan/2805.9942; Oxidation/15.9949	1	a_hIgA-AR-GLTrFASP-FZpipHILIC_8mAbs_E2_step.raw_20240829_noglyc_spec_cut	248.57	9.92e-01 - 1.00e+00	10100000	0	37.57	4	7,8,17	162	184	9.99e-01 - 1.00e+00	16.9 - 25.5	7.9 - 16.9	1400.8343; 1400.8348	1400.84	-2.74; -2.39	0	5599.32	14	2.04e+06	37.57	14-11672	HexNAc(6)Hex(8)NeuAc(1)
88.1.2	85683	37.7600	11736	sp|P01042|KNG1_HUMAN Kininogen-1 OS=Homo sapiens OX=9606 GN=KNG1 PE=1 SV=2	P01042	N,N,M	168,169,178	169	R.HGIQYFnnNTQHSSLFmLNEVKR.A	HexNAc(6)Hex(8)NeuAc(1)	Uncertain			AR	a	5599.3101	Deamidated/0.9840; NGlycan/2805.9942; Oxidation/15.9949	0	a_hIgA-AR-GLTrFASP-FZpipHILIC_8mAbs_E2_step.raw_20240829_noglyc_spec_cut	248.57	0.99	10100000	0	37.57	4	7,8,17	162	184	1	25.5	7.9	1400.8348	1400.84	-2.39	0	5599.32	14	2.04e+06	37.57	14-11736	HexNAc(6)Hex(8)NeuAc(1)
88.2	101918; 101924	37.5700; 37.6300	12537; 12561	sp|P01042|KNG1_HUMAN Kininogen-1 OS=Homo sapiens OX=9606 GN=KNG1 PE=1 SV=2	P01042	N,N,M	168,169,178	169	R.HGIQYFnnNTQHSSLFmLNEVKR.A	HexNAc(6)Hex(8)NeuAc(1)	Uncertain			AR	b	5599.3066; 5599.3126	Deamidated/0.9840; NGlycan/2805.9942; Oxidation/15.9949	1	b_hIgA-AR-GLTrFASP-FZpipHILIC_11mAbs_E2_step.raw_20240829_noglyc_spec_cut	279.38	9.97e-01 - 9.98e-01	5870000	0	37.63	4	7,8,17	162	184	1.00e+00 - 1.00e+00	42.5 - 44.4	6.9 - 17.9	1400.8339; 1400.8354	1400.84	-3.02; -1.96	-1	5599.32	17	1.7e+06	37.63	17-12537	HexNAc(6)Hex(8)NeuAc(1)
88.2.2	101924	37.6300	12561	sp|P01042|KNG1_HUMAN Kininogen-1 OS=Homo sapiens OX=9606 GN=KNG1 PE=1 SV=2	P01042	N,N,M	168,169,178	169	R.HGIQYFnnNTQHSSLFmLNEVKR.A	HexNAc(6)Hex(8)NeuAc(1)	Uncertain			AR	b	5599.3126	Deamidated/0.9840; NGlycan/2805.9942; Oxidation/15.9949	0	b_hIgA-AR-GLTrFASP-FZpipHILIC_11mAbs_E2_step.raw_20240829_noglyc_spec_cut	273.99	1	5870000	0	37.63	4	7,8,17	162	184	1	44.4	6.9	1400.8354	1400.84	-1.96	-1	5599.32	17	1.7e+06	37.63	17-12561	HexNAc(6)Hex(8)NeuAc(1)
88.3	118784; 118792	37.5100; 37.6500	12576; 12625	sp|P01042|KNG1_HUMAN Kininogen-1 OS=Homo sapiens OX=9606 GN=KNG1 PE=1 SV=2	P01042	N,N,M	168,169,178	169	R.HGIQYFnnNTQHSSLFmLNEVKR.A	HexNAc(6)Hex(8)NeuAc(1)	Uncertain			AR	c	5599.3069; 5599.3131	Deamidated/0.9840; NGlycan/2805.9942; Oxidation/15.9949	1	c_hIgA-AR-GLTrFASP-FZpipHILIC_16mAbs_E2_step.raw_20240829_noglyc_spec_cut	226.46	1.00e+00 - 1.00e+00	2180000	0	37.59	4	7,8,17	162	184	1.00e+00 - 1.00e+00	18.7 - 28.8	16.2 - 16.2	1400.8340; 1400.8356	1400.84	-2.97; -1.86	-1	5599.32	20	4.2e+05	37.59	20-12576	HexNAc(6)Hex(8)NeuAc(1)
88.3.2	118792	37.6500	12625	sp|P01042|KNG1_HUMAN Kininogen-1 OS=Homo sapiens OX=9606 GN=KNG1 PE=1 SV=2	P01042	N,N,M	168,169,178	169	R.HGIQYFnnNTQHSSLFmLNEVKR.A	HexNAc(6)Hex(8)NeuAc(1)	Uncertain			AR	c	5599.3131	Deamidated/0.9840; NGlycan/2805.9942; Oxidation/15.9949	0	c_hIgA-AR-GLTrFASP-FZpipHILIC_16mAbs_E2_step.raw_20240829_noglyc_spec_cut	182.74	1	2180000	0	37.59	4	7,8,17	162	184	1	18.7	16.2	1400.8356	1400.84	-1.86	-1	5599.32	20	4.2e+05	37.59	20-12625	HexNAc(6)Hex(8)NeuAc(1)
88.4	134702	37.5600	12073	sp|P01042|KNG1_HUMAN Kininogen-1 OS=Homo sapiens OX=9606 GN=KNG1 PE=1 SV=2	P01042	N,N,M	168,169,178	169	R.HGIQYFnnNTQHSSLFmLNEVKR.A	HexNAc(6)Hex(8)NeuAc(1)	Uncertain			AR	d	5599.3187	Deamidated/0.9840; NGlycan/2805.9942; Oxidation/15.9949	1	d_hIgA-AR-GLTrFASP-FZpipHILIC_16mAbs_E2_step.raw_20240829_noglyc_spec_cut	291.09	0.77	8390000	0	37.53	4	7,8,17	162	184	0.95	63.9	18.4	1400.8369	1400.84	-0.87	-1	5599.32	23	1.47e+06	37.53	23-12073	HexNAc(6)Hex(8)NeuAc(1)
89	17007; 31537; 36856; 51160; 51161; 56358; 75446; 135454	45.4400; 45.4600; 45.4700; 45.5100; 45.4800; 45.4300; 44.8100	16780; 16372; 16971; 16258; 16278; 16991; 15911; 14610	sp|P01042|KNG1_HUMAN Kininogen-1 OS=Homo sapiens OX=9606 GN=KNG1 PE=1 SV=2	P01042	N	169	169	R.HGIQYFNnNTQHSSLFMLNEVKR.A	HexNAc(4)Hex(5)Fuc(3)NeuAc(1)	Uncertain			SA	b	5128.2246; 5128.2254; 5128.2261; 5128.2241; 5128.2193; 5128.2250; 5128.2255; 5128.2256	NGlycan/2351.8508	2	b_hIgA-SA-GLTrFASP-FZpipHILIC_E1_step.raw_20240829_noglyc_spec_cut; c_hIgA-SA-GLTrFASP-FZpipHILIC_D_step.raw_20240829_noglyc_spec_cut; c_hIgA-SA-GLTrFASP-FZpipHILIC_E1_step.raw_20240829_noglyc_spec_cut; d_hIgA-SA-GLTrFASP-FZpipHILIC_D_step.raw_20240829_noglyc_spec_cut; d_hIgA-SA-GLTrFASP-FZpipHILIC_E1_step.raw_20240829_noglyc_spec_cut; a_hIgA-SA-GLTrFASP-FZpipHILIC_E1_step.raw_20240829_noglyc_spe…	189.43	7.55e-01 - 1.00e+00		3	44.81 - 45.51	4	8	162	184	7.55e-01 - 1.00e+00	29.4 - 169.8	29.4 - 169.8	1283.0634; 1283.0636; 1283.0638; 1283.0633; 1283.0621; 1283.0635; 1283.0636; 1283.0637	1283.06	4.57; 4.73; 4.88; 4.49; 3.55; 4.65; 4.75; 4.77	-1	5128.2	3; 5; 6; 8; 9; 12; 23	6.733e+05 - 7.874e+07	44.81 - 45.51	3; 5; 6; 8; 9; 12; 23-16780	HexNAc(4)Hex(5)Fuc(3)NeuAc(1)
89.1	17007	45.4400	16780	sp|P01042|KNG1_HUMAN Kininogen-1 OS=Homo sapiens OX=9606 GN=KNG1 PE=1 SV=2	P01042	N	169	169	R.HGIQYFNnNTQHSSLFMLNEVKR.A	HexNAc(4)Hex(5)Fuc(3)NeuAc(1)	Uncertain			SA	b	5128.2246	NGlycan/2351.8508	1	b_hIgA-SA-GLTrFASP-FZpipHILIC_E1_step.raw_20240829_noglyc_spec_cut	146.59	1	379000000	3	45.49	4	8	162	184	1	31.1	31.1	1283.0634	1283.06	4.57	-1	5128.2	3	5.45e+07	45.49	3-16780	HexNAc(4)Hex(5)Fuc(3)NeuAc(1)
89.2	31537	45.4600	16372	sp|P01042|KNG1_HUMAN Kininogen-1 OS=Homo sapiens OX=9606 GN=KNG1 PE=1 SV=2	P01042	N	169	169	R.HGIQYFNnNTQHSSLFMLNEVKR.A	HexNAc(4)Hex(5)Fuc(3)NeuAc(1)	Uncertain			SA	c	5128.2254	NGlycan/2351.8508	1	c_hIgA-SA-GLTrFASP-FZpipHILIC_D_step.raw_20240829_noglyc_spec_cut	123.1	0.99	40700000	3	45.49	4	8	162	184	0.99	50.3	50.3	1283.0636	1283.06	4.73	-1	5128.2	5	8.87e+06	45.49	5-16372	HexNAc(4)Hex(5)Fuc(3)NeuAc(1)
89.3	36856	45.4700	16971	sp|P01042|KNG1_HUMAN Kininogen-1 OS=Homo sapiens OX=9606 GN=KNG1 PE=1 SV=2	P01042	N	169	169	R.HGIQYFNnNTQHSSLFMLNEVKR.A	HexNAc(4)Hex(5)Fuc(3)NeuAc(1)	Uncertain			SA	c	5128.2261	NGlycan/2351.8508	1	c_hIgA-SA-GLTrFASP-FZpipHILIC_E1_step.raw_20240829_noglyc_spec_cut	132	1	415000000	3	45.49	4	8	162	184	1	61.2	61.2	1283.0638	1283.06	4.88	-1	5128.2	6	7.87e+07	45.49	6-16971	HexNAc(4)Hex(5)Fuc(3)NeuAc(1)
89.4	51160; 51161	45.4600; 45.5100	16258; 16278	sp|P01042|KNG1_HUMAN Kininogen-1 OS=Homo sapiens OX=9606 GN=KNG1 PE=1 SV=2	P01042	N	169	169	R.HGIQYFNnNTQHSSLFMLNEVKR.A	HexNAc(4)Hex(5)Fuc(3)NeuAc(1)	Uncertain			SA	d	5128.2241; 5128.2193	NGlycan/2351.8508	1	d_hIgA-SA-GLTrFASP-FZpipHILIC_D_step.raw_20240829_noglyc_spec_cut	176.25	7.55e-01 - 9.35e-01	31500000	3	45.51	4	8	162	184	7.55e-01 - 9.35e-01	69.9 - 169.8	69.9 - 169.8	1283.0633; 1283.0621	1283.06	4.49; 3.55	-1	5128.2	8	5.52e+06	45.51	8-16258	HexNAc(4)Hex(5)Fuc(3)NeuAc(1)
89.4.2	51161	45.5100	16278	sp|P01042|KNG1_HUMAN Kininogen-1 OS=Homo sapiens OX=9606 GN=KNG1 PE=1 SV=2	P01042	N	169	169	R.HGIQYFNnNTQHSSLFMLNEVKR.A	HexNAc(4)Hex(5)Fuc(3)NeuAc(1)	Uncertain			SA	d	5128.2193	NGlycan/2351.8508	0	d_hIgA-SA-GLTrFASP-FZpipHILIC_D_step.raw_20240829_noglyc_spec_cut	176.25	0.76	31500000	3	45.51	4	8	162	184	0.76	169.8	169.8	1283.0621	1283.06	3.55	-1	5128.2	8	5.52e+06	45.51	8-16278	HexNAc(4)Hex(5)Fuc(3)NeuAc(1)
89.5	56358	45.4800	16991	sp|P01042|KNG1_HUMAN Kininogen-1 OS=Homo sapiens OX=9606 GN=KNG1 PE=1 SV=2	P01042	N	169	169	R.HGIQYFNnNTQHSSLFMLNEVKR.A	HexNAc(4)Hex(5)Fuc(3)NeuAc(1)	Uncertain			SA	d	5128.2250	NGlycan/2351.8508	1	d_hIgA-SA-GLTrFASP-FZpipHILIC_E1_step.raw_20240829_noglyc_spec_cut	143.8	1	299000000	3	45.50	4	8	162	184	1	48.1	48.1	1283.0635	1283.06	4.65	-1	5128.2	9	4.28e+07	45.50	9-16991	HexNAc(4)Hex(5)Fuc(3)NeuAc(1)
89.6	75446	45.4300	15911	sp|P01042|KNG1_HUMAN Kininogen-1 OS=Homo sapiens OX=9606 GN=KNG1 PE=1 SV=2	P01042	N	169	169	R.HGIQYFNnNTQHSSLFMLNEVKR.A	HexNAc(4)Hex(5)Fuc(3)NeuAc(1)	Uncertain			SA	a	5128.2255	NGlycan/2351.8508	1	a_hIgA-SA-GLTrFASP-FZpipHILIC_E1_step.raw_20240829_noglyc_spec_cut	148.99	1	419000000	3	45.50	4	8	162	184	1	29.4	29.4	1283.0636	1283.06	4.75	-1	5128.2	12	6.09e+07	45.50	12-15911	HexNAc(4)Hex(5)Fuc(3)NeuAc(1)
89.7	135454	44.8100	14610	sp|P01042|KNG1_HUMAN Kininogen-1 OS=Homo sapiens OX=9606 GN=KNG1 PE=1 SV=2	P01042	N	169	169	R.HGIQYFNnNTQHSSLFMLNEVKR.A	HexNAc(4)Hex(5)Fuc(3)NeuAc(1)	Uncertain			AR	d	5128.2256	NGlycan/2351.8508	1	d_hIgA-AR-GLTrFASP-FZpipHILIC_16mAbs_E2_step.raw_20240829_noglyc_spec_cut	189.43	1	4210000	3	44.81	4	8	162	184	1	68.4	68.4	1283.0637	1283.06	4.77	-1	5128.2	23	6.73e+05	44.81	23-14610	HexNAc(4)Hex(5)Fuc(3)NeuAc(1)
90	133781	29.6000	9035	sp|P01042|KNG1_HUMAN Kininogen-1 OS=Homo sapiens OX=9606 GN=KNG1 PE=1 SV=2	P01042	N,Q,M	169,172,178	169	R.HGIQYFNnNTqHSSLFmLNEVKR.A	HexNAc(6)Hex(4)NeuAc(1)	Uncertain			AR	d	4951.1349	NGlycan/2157.7829; Deamidated/0.9840; Oxidation/15.9949	1	d_hIgA-AR-GLTrFASP-FZpipHILIC_16mAbs_E2_step.raw_20240829_noglyc_spec_cut	180.69	1	1400000	0	29.63	4	8,11,17	162	184	1	2.2	1.9	1238.7910	1238.79	4.58	0	4951.11	23	1.15e+06	29.63	23-9035	HexNAc(6)Hex(4)NeuAc(1)
91	85065	32.6600	9842	sp|P01042|KNG1_HUMAN Kininogen-1 OS=Homo sapiens OX=9606 GN=KNG1 PE=1 SV=2	P01042	N,Q,M	169,172,178	169	R.HGIQYFNnNTqHSSLFmLNEVKR.A	HexNAc(4)Hex(6)Fuc(2)NeuAc(1)	Uncertain			AR	a	5161.1695	NGlycan/2367.8457; Deamidated/0.9840; Oxidation/15.9949	1	a_hIgA-AR-GLTrFASP-FZpipHILIC_8mAbs_E2_step.raw_20240829_noglyc_spec_cut	292.81	0.97	14700000	0	32.59	4	8,11,17	162	184	1	80.6	12.1	1291.2997	1291.3	-1.05	-1	5161.18	14	2.23e+06	32.59	14-9842	HexNAc(4)Hex(6)Fuc(2)NeuAc(1)
92	85444	35.6400	10962	sp|P01042|KNG1_HUMAN Kininogen-1 OS=Homo sapiens OX=9606 GN=KNG1 PE=1 SV=2	P01042	N,Q,M	169,172,178	169	R.HGIQYFNnNTqHSSLFmLNEVKR.A	HexNAc(6)Hex(8)NeuAc(1)	Uncertain			AR	a	5599.3189	NGlycan/2805.9942; Deamidated/0.9840; Oxidation/15.9949	1	a_hIgA-AR-GLTrFASP-FZpipHILIC_8mAbs_E2_step.raw_20240829_noglyc_spec_cut	262.15	0.99	2830000	0	35.67	4	8,11,17	162	184	1	6.4	0.0	1400.8370	1400.84	-0.82	-1	5599.32	14	1.16e+06	35.67	14-10962	HexNAc(6)Hex(8)NeuAc(1)
93	101587	34.8100	11528	sp|P01042|KNG1_HUMAN Kininogen-1 OS=Homo sapiens OX=9606 GN=KNG1 PE=1 SV=2	P01042	N,Q,M	169,172,178	169	R.HGIQYFNnNTqHSSLFmLNEVKR.A	HexNAc(5)Hex(7)Fuc(2)NeuAc(2)	Uncertain			AR	b	5817.3961	NGlycan/3024.0733; Deamidated/0.9840; Oxidation/15.9949	1	b_hIgA-AR-GLTrFASP-FZpipHILIC_11mAbs_E2_step.raw_20240829_noglyc_spec_cut	275.1	0.92	6630000	0	34.82	4	8,11,17	162	184	0.99	49.8	5.2	1455.3563	1455.36	-1.12	-1	5817.4	17	7.25e+05	34.82	17-11528	HexNAc(5)Hex(7)Fuc(2)NeuAc(2)
94	84796	30.3000	8932	sp|P01042|KNG1_HUMAN Kininogen-1 OS=Homo sapiens OX=9606 GN=KNG1 PE=1 SV=2	P01042	N,M	169,178	169	R.HGIQYFNnNTQHSSLFmLNEVKR.A	HexNAc(6)Hex(4)NeuAc(1)	Uncertain			AR	a	4950.1344	NGlycan/2157.7829; Oxidation/15.9949	1	a_hIgA-AR-GLTrFASP-FZpipHILIC_8mAbs_E2_step.raw_20240829_noglyc_spec_cut	166.09	1	9850000	2	30.28	5	8,17	162	184	1	95.2	30.3	991.0342	991.033	1.25	0	4950.13	14	1.7e+06	30.28	14-8932	HexNAc(6)Hex(4)NeuAc(1)
95	118250; 134026	32.3400; 32.0800	10718; 9991	sp|P01042|KNG1_HUMAN Kininogen-1 OS=Homo sapiens OX=9606 GN=KNG1 PE=1 SV=2	P01042	N,M	169,178	169	R.HGIQYFNnNTQHSSLFmLNEVKR.A	HexNAc(4)Hex(6)Fuc(2)NeuAc(1)	Uncertain			AR	c	5160.1675; 5160.1698	NGlycan/2367.8457; Oxidation/15.9949	2	c_hIgA-AR-GLTrFASP-FZpipHILIC_16mAbs_E2_step.raw_20240829_noglyc_spec_cut; d_hIgA-AR-GLTrFASP-FZpipHILIC_16mAbs_E2_step.raw_20240829_noglyc_spec_cut	344.46	8.23e-01 - 1.00e+00		3	32.07 - 32.31	4	8,17	162	184	9.63e-01 - 1.00e+00	15.9 - 83.8	15.9 - 83.8	1291.0492; 1291.0497	1291.06	-4.54; -4.09	-1	5160.19	20; 23	9.799e+05 - 3.182e+06	32.07 - 32.31	20; 23-10718	HexNAc(4)Hex(6)Fuc(2)NeuAc(1)
95.1	118250	32.3400	10718	sp|P01042|KNG1_HUMAN Kininogen-1 OS=Homo sapiens OX=9606 GN=KNG1 PE=1 SV=2	P01042	N,M	169,178	169	R.HGIQYFNnNTQHSSLFmLNEVKR.A	HexNAc(4)Hex(6)Fuc(2)NeuAc(1)	Uncertain			AR	c	5160.1675	NGlycan/2367.8457; Oxidation/15.9949	1	c_hIgA-AR-GLTrFASP-FZpipHILIC_16mAbs_E2_step.raw_20240829_noglyc_spec_cut	171.61	1	7670000	3	32.31	4	8,17	162	184	1	15.9	15.9	1291.0492	1291.06	-4.54	-1	5160.19	20	9.8e+05	32.31	20-10718	HexNAc(4)Hex(6)Fuc(2)NeuAc(1)
95.2	134026	32.0800	9991	sp|P01042|KNG1_HUMAN Kininogen-1 OS=Homo sapiens OX=9606 GN=KNG1 PE=1 SV=2	P01042	N,M	169,178	169	R.HGIQYFNnNTQHSSLFmLNEVKR.A	HexNAc(4)Hex(6)Fuc(2)NeuAc(1)	Uncertain			AR	d	5160.1698	NGlycan/2367.8457; Oxidation/15.9949	1	d_hIgA-AR-GLTrFASP-FZpipHILIC_16mAbs_E2_step.raw_20240829_noglyc_spec_cut	344.46	0.82	32300000	3	32.07	4	8,17	162	184	0.96	83.8	83.8	1291.0497	1291.06	-4.09	-1	5160.19	23	3.18e+06	32.07	23-9991	HexNAc(4)Hex(6)Fuc(2)NeuAc(1)
96	85321; 85358; 85398; 101590; 101636; 118468; 118506; 134365; 134388	34.8700; 35.0900; 35.3700; 34.8200; 35.1100; 34.7100; 34.9900; 34.6200; 34.7700	10675; 10756; 10858; 11534; 11642; 11587; 11684; 10962; 11020	sp|P01042|KNG1_HUMAN Kininogen-1 OS=Homo sapiens OX=9606 GN=KNG1 PE=1 SV=2	P01042	N,M	169,178	169	R.HGIQYFNnNTQHSSLFmLNEVKR.A	HexNAc(6)Hex(8)NeuAc(1)	Uncertain			AR	a	5598.3256; 5598.3266; 5598.3267; 5598.3246; 5598.3249; 5598.3250; 5598.3318; 5598.3285; 5598.3250	NGlycan/2805.9942; Oxidation/15.9949	2	a_hIgA-AR-GLTrFASP-FZpipHILIC_8mAbs_E2_step.raw_20240829_noglyc_spec_cut; b_hIgA-AR-GLTrFASP-FZpipHILIC_11mAbs_E2_step.raw_20240829_noglyc_spec_cut; c_hIgA-AR-GLTrFASP-FZpipHILIC_16mAbs_E2_step.raw_20240829_noglyc_spec_cut; d_hIgA-AR-GLTrFASP-FZpipHILIC_16mAbs_E2_step.raw_20240829_noglyc_spec_cut	317.33	7.93e-01 - 1.00e+00		3	34.72 - 34.98	4	8,17	162	184	9.58e-01 - 1.00e+00	1.0 - 65.9	1.0 - 65.9	1400.5887; 1400.5889; 1400.5890; 1400.5884; 1400.5885; 1400.5885; 1400.5902; 1400.5894; 1400.5885	1400.59	-2.49; -2.31; -2.28; -2.66; -2.61; -2.60; -1.38; -1.97; -2.59	-1	5598.34	14; 17; 20; 23	4.923e+06 - 1.813e+07	34.72 - 34.98	14; 17; 20; 23-10675	HexNAc(6)Hex(8)NeuAc(1)
96.1	85321; 85358; 85398	34.8700; 35.0900; 35.3700	10675; 10756; 10858	sp|P01042|KNG1_HUMAN Kininogen-1 OS=Homo sapiens OX=9606 GN=KNG1 PE=1 SV=2	P01042	N,M	169,178	169	R.HGIQYFNnNTQHSSLFmLNEVKR.A	HexNAc(6)Hex(8)NeuAc(1)	Uncertain			AR	a	5598.3256; 5598.3266; 5598.3267	NGlycan/2805.9942; Oxidation/15.9949	1	a_hIgA-AR-GLTrFASP-FZpipHILIC_8mAbs_E2_step.raw_20240829_noglyc_spec_cut	288.9	9.69e-01 - 9.92e-01	180000000	3	34.98	4	8,17	162	184	9.94e-01 - 9.99e-01	18.6 - 53.7	18.6 - 53.7	1400.5887; 1400.5889; 1400.5890	1400.59	-2.49; -2.31; -2.28	-1	5598.34	14	1.69e+07	34.98	14-10675	HexNAc(6)Hex(8)NeuAc(1)
96.1.2	85358	35.0900	10756	sp|P01042|KNG1_HUMAN Kininogen-1 OS=Homo sapiens OX=9606 GN=KNG1 PE=1 SV=2	P01042	N,M	169,178	169	R.HGIQYFNnNTQHSSLFmLNEVKR.A	HexNAc(6)Hex(8)NeuAc(1)	Uncertain			AR	a	5598.3266	NGlycan/2805.9942; Oxidation/15.9949	0	a_hIgA-AR-GLTrFASP-FZpipHILIC_8mAbs_E2_step.raw_20240829_noglyc_spec_cut	261.69	0.99	180000000	3	34.98	4	8,17	162	184	1	18.6	18.6	1400.5889	1400.59	-2.31	-1	5598.34	14	1.69e+07	34.98	14-10756	HexNAc(6)Hex(8)NeuAc(1)
96.1.3	85398	35.3700	10858	sp|P01042|KNG1_HUMAN Kininogen-1 OS=Homo sapiens OX=9606 GN=KNG1 PE=1 SV=2	P01042	N,M	169,178	169	R.HGIQYFNnNTQHSSLFmLNEVKR.A	HexNAc(6)Hex(8)NeuAc(1)	Uncertain			AR	a	5598.3267	NGlycan/2805.9942; Oxidation/15.9949	0	a_hIgA-AR-GLTrFASP-FZpipHILIC_8mAbs_E2_step.raw_20240829_noglyc_spec_cut	271.92	0.99	180000000	3	34.98	4	8,17	162	184	1	19.2	19.2	1400.5890	1400.59	-2.28	-1	5598.34	14	1.69e+07	34.98	14-10858	HexNAc(6)Hex(8)NeuAc(1)
96.2	101590; 101636	34.8200; 35.1100	11534; 11642	sp|P01042|KNG1_HUMAN Kininogen-1 OS=Homo sapiens OX=9606 GN=KNG1 PE=1 SV=2	P01042	N,M	169,178	169	R.HGIQYFNnNTQHSSLFmLNEVKR.A	HexNAc(6)Hex(8)NeuAc(1)	Uncertain			AR	b	5598.3246; 5598.3249	NGlycan/2805.9942; Oxidation/15.9949	1	b_hIgA-AR-GLTrFASP-FZpipHILIC_11mAbs_E2_step.raw_20240829_noglyc_spec_cut	294.12	7.93e-01 - 9.97e-01	169000000	3	34.90	4	8,17	162	184	9.58e-01 - 9.99e-01	1.0 - 65.9	1.0 - 65.9	1400.5884; 1400.5885	1400.59	-2.66; -2.61	-1	5598.34	17	1.66e+07	34.90	17-11534	HexNAc(6)Hex(8)NeuAc(1)
96.2.2	101636	35.1100	11642	sp|P01042|KNG1_HUMAN Kininogen-1 OS=Homo sapiens OX=9606 GN=KNG1 PE=1 SV=2	P01042	N,M	169,178	169	R.HGIQYFNnNTQHSSLFmLNEVKR.A	HexNAc(6)Hex(8)NeuAc(1)	Uncertain			AR	b	5598.3249	NGlycan/2805.9942; Oxidation/15.9949	0	b_hIgA-AR-GLTrFASP-FZpipHILIC_11mAbs_E2_step.raw_20240829_noglyc_spec_cut	246.24	1	169000000	3	34.90	4	8,17	162	184	1	1.0	1.0	1400.5885	1400.59	-2.61	-1	5598.34	17	1.66e+07	34.90	17-11642	HexNAc(6)Hex(8)NeuAc(1)
96.3	118468; 118506	34.7100; 34.9900	11587; 11684	sp|P01042|KNG1_HUMAN Kininogen-1 OS=Homo sapiens OX=9606 GN=KNG1 PE=1 SV=2	P01042	N,M	169,178	169	R.HGIQYFNnNTQHSSLFmLNEVKR.A	HexNAc(6)Hex(8)NeuAc(1)	Uncertain			AR	c	5598.3250; 5598.3318	NGlycan/2805.9942; Oxidation/15.9949	1	c_hIgA-AR-GLTrFASP-FZpipHILIC_16mAbs_E2_step.raw_20240829_noglyc_spec_cut	317.33	1.00e+00 - 1.00e+00	53000000	3	34.79	4	8,17	162	184	1.00e+00 - 1.00e+00	50.4 - 52.4	50.4 - 52.4	1400.5885; 1400.5902	1400.59	-2.60; -1.38	-1	5598.34	20	4.92e+06	34.79	20-11587	HexNAc(6)Hex(8)NeuAc(1)
96.3.2	118506	34.9900	11684	sp|P01042|KNG1_HUMAN Kininogen-1 OS=Homo sapiens OX=9606 GN=KNG1 PE=1 SV=2	P01042	N,M	169,178	169	R.HGIQYFNnNTQHSSLFmLNEVKR.A	HexNAc(6)Hex(8)NeuAc(1)	Uncertain			AR	c	5598.3318	NGlycan/2805.9942; Oxidation/15.9949	0	c_hIgA-AR-GLTrFASP-FZpipHILIC_16mAbs_E2_step.raw_20240829_noglyc_spec_cut	255.97	1	53000000	3	34.79	4	8,17	162	184	1	52.4	52.4	1400.5902	1400.59	-1.38	-1	5598.34	20	4.92e+06	34.79	20-11684	HexNAc(6)Hex(8)NeuAc(1)
96.4	134365; 134388	34.6200; 34.7700	10962; 11020	sp|P01042|KNG1_HUMAN Kininogen-1 OS=Homo sapiens OX=9606 GN=KNG1 PE=1 SV=2	P01042	N,M	169,178	169	R.HGIQYFNnNTQHSSLFmLNEVKR.A	HexNAc(6)Hex(8)NeuAc(1)	Uncertain			AR	d	5598.3285; 5598.3250	NGlycan/2805.9942; Oxidation/15.9949	1	d_hIgA-AR-GLTrFASP-FZpipHILIC_16mAbs_E2_step.raw_20240829_noglyc_spec_cut	240.97	9.70e-01 - 1.00e+00	185000000	3	34.72	4	8,17	162	184	9.94e-01 - 1.00e+00	29.0 - 31.2	29.0 - 31.2	1400.5894; 1400.5885	1400.59	-1.97; -2.59	-1	5598.34	23	1.81e+07	34.72	23-10962	HexNAc(6)Hex(8)NeuAc(1)
96.4.2	134388	34.7700	11020	sp|P01042|KNG1_HUMAN Kininogen-1 OS=Homo sapiens OX=9606 GN=KNG1 PE=1 SV=2	P01042	N,M	169,178	169	R.HGIQYFNnNTQHSSLFmLNEVKR.A	HexNAc(6)Hex(8)NeuAc(1)	Uncertain			AR	d	5598.3250	NGlycan/2805.9942; Oxidation/15.9949	0	d_hIgA-AR-GLTrFASP-FZpipHILIC_16mAbs_E2_step.raw_20240829_noglyc_spec_cut	240.97	0.97	185000000	3	34.72	4	8,17	162	184	0.99	31.2	31.2	1400.5885	1400.59	-2.59	-1	5598.34	23	1.81e+07	34.72	23-11020	HexNAc(6)Hex(8)NeuAc(1)
97	85316; 85337; 101579; 101583; 118466; 134360; 134377	34.8200; 34.9700; 34.7500; 34.7800; 34.7000; 34.5700; 34.6800	10657; 10713; 11505; 11520; 11581; 10945; 10987	sp|P01042|KNG1_HUMAN Kininogen-1 OS=Homo sapiens OX=9606 GN=KNG1 PE=1 SV=2	P01042	N,M	169,178	169	R.HGIQYFNnNTQHSSLFmLNEVKR.A	HexNAc(5)Hex(7)Fuc(2)NeuAc(2)	Uncertain			AR	a	5816.3942; 5816.4039; 5816.3976; 5816.4000; 5816.4144; 5816.4023; 5816.4018	NGlycan/3024.0733; Oxidation/15.9949	2	a_hIgA-AR-GLTrFASP-FZpipHILIC_8mAbs_E2_step.raw_20240829_noglyc_spec_cut; b_hIgA-AR-GLTrFASP-FZpipHILIC_11mAbs_E2_step.raw_20240829_noglyc_spec_cut; c_hIgA-AR-GLTrFASP-FZpipHILIC_16mAbs_E2_step.raw_20240829_noglyc_spec_cut; d_hIgA-AR-GLTrFASP-FZpipHILIC_16mAbs_E2_step.raw_20240829_noglyc_spec_cut	303.56	9.53e-01 - 1.00e+00		3	34.54 - 34.84	4	8,17	162	184	9.92e-01 - 1.00e+00	0.1 - 118.7	0.1 - 94.3	1455.1058; 1455.1082; 1455.1067; 1455.1073; 1455.1109; 1455.1079; 1455.1077	1455.11	-4.20; -2.52; -3.60; -3.19; -0.72; -2.79; -2.88	-1 - 0	5816.42	14; 17; 20; 23	3.322e+05 - 1.364e+06	34.54 - 34.84	14; 17; 20; 23-10657	HexNAc(5)Hex(7)Fuc(2)NeuAc(2)
97.1	85316; 85337	34.8200; 34.9700	10657; 10713	sp|P01042|KNG1_HUMAN Kininogen-1 OS=Homo sapiens OX=9606 GN=KNG1 PE=1 SV=2	P01042	N,M	169,178	169	R.HGIQYFNnNTQHSSLFmLNEVKR.A	HexNAc(5)Hex(7)Fuc(2)NeuAc(2)	Uncertain			AR	a	5816.3942; 5816.4039	NGlycan/3024.0733; Oxidation/15.9949	1	a_hIgA-AR-GLTrFASP-FZpipHILIC_8mAbs_E2_step.raw_20240829_noglyc_spec_cut	271.79	9.86e-01 - 9.93e-01	19900000	3	34.84	4	8,17	162	184	9.97e-01 - 9.99e-01	28.7 - 35.0	2.2 - 17.8	1455.1058; 1455.1082	1455.11	-4.20; -2.52	0	5816.42	14	1.36e+06	34.84	14-10657	HexNAc(5)Hex(7)Fuc(2)NeuAc(2)
97.1.2	85337	34.9700	10713	sp|P01042|KNG1_HUMAN Kininogen-1 OS=Homo sapiens OX=9606 GN=KNG1 PE=1 SV=2	P01042	N,M	169,178	169	R.HGIQYFNnNTQHSSLFmLNEVKR.A	HexNAc(5)Hex(7)Fuc(2)NeuAc(2)	Uncertain			AR	a	5816.4039	NGlycan/3024.0733; Oxidation/15.9949	0	a_hIgA-AR-GLTrFASP-FZpipHILIC_8mAbs_E2_step.raw_20240829_noglyc_spec_cut	252.84	0.99	19900000	3	34.84	4	8,17	162	184	1	28.7	2.2	1455.1082	1455.11	-2.52	0	5816.42	14	1.36e+06	34.84	14-10713	HexNAc(5)Hex(7)Fuc(2)NeuAc(2)
97.2	101579; 101583	34.7500; 34.7800	11505; 11520	sp|P01042|KNG1_HUMAN Kininogen-1 OS=Homo sapiens OX=9606 GN=KNG1 PE=1 SV=2	P01042	N,M	169,178	169	R.HGIQYFNnNTQHSSLFmLNEVKR.A	HexNAc(5)Hex(7)Fuc(2)NeuAc(2)	Uncertain			AR	b	5816.3976; 5816.4000	NGlycan/3024.0733; Oxidation/15.9949	1	b_hIgA-AR-GLTrFASP-FZpipHILIC_11mAbs_E2_step.raw_20240829_noglyc_spec_cut	303.56	9.53e-01 - 1.00e+00	8960000	3	34.79	4	8,17	162	184	9.92e-01 - 1.00e+00	0.1 - 64.0	0.1 - 64.0	1455.1067; 1455.1073	1455.11	-3.60; -3.19	-1	5816.42	17	8.17e+05	34.79	17-11505	HexNAc(5)Hex(7)Fuc(2)NeuAc(2)
97.2.2	101583	34.7800	11520	sp|P01042|KNG1_HUMAN Kininogen-1 OS=Homo sapiens OX=9606 GN=KNG1 PE=1 SV=2	P01042	N,M	169,178	169	R.HGIQYFNnNTQHSSLFmLNEVKR.A	HexNAc(5)Hex(7)Fuc(2)NeuAc(2)	Uncertain			AR	b	5816.4000	NGlycan/3024.0733; Oxidation/15.9949	0	b_hIgA-AR-GLTrFASP-FZpipHILIC_11mAbs_E2_step.raw_20240829_noglyc_spec_cut	303.56	0.95	8960000	3	34.79	4	8,17	162	184	0.99	64.0	64.0	1455.1073	1455.11	-3.19	-1	5816.42	17	8.17e+05	34.79	17-11520	HexNAc(5)Hex(7)Fuc(2)NeuAc(2)
97.3	118466	34.7000	11581	sp|P01042|KNG1_HUMAN Kininogen-1 OS=Homo sapiens OX=9606 GN=KNG1 PE=1 SV=2	P01042	N,M	169,178	169	R.HGIQYFNnNTQHSSLFmLNEVKR.A	HexNAc(5)Hex(7)Fuc(2)NeuAc(2)	Uncertain			AR	c	5816.4144	NGlycan/3024.0733; Oxidation/15.9949	1	c_hIgA-AR-GLTrFASP-FZpipHILIC_16mAbs_E2_step.raw_20240829_noglyc_spec_cut	118.72	1	4540000	3	34.69	4	8,17	162	184	1	118.7	94.3	1455.1109	1455.11	-0.72	-1	5816.42	20	3.32e+05	34.69	20-11581	HexNAc(5)Hex(7)Fuc(2)NeuAc(2)
97.4	134360; 134377	34.5700; 34.6800	10945; 10987	sp|P01042|KNG1_HUMAN Kininogen-1 OS=Homo sapiens OX=9606 GN=KNG1 PE=1 SV=2	P01042	N,M	169,178	169	R.HGIQYFNnNTQHSSLFmLNEVKR.A	HexNAc(5)Hex(7)Fuc(2)NeuAc(2)	Uncertain			AR	d	5816.4023; 5816.4018	NGlycan/3024.0733; Oxidation/15.9949	1	d_hIgA-AR-GLTrFASP-FZpipHILIC_16mAbs_E2_step.raw_20240829_noglyc_spec_cut	211.57	1.00e+00 - 1.00e+00	19100000	3	34.54	4	8,17	162	184	1.00e+00 - 1.00e+00	9.1 - 24.2	9.1 - 24.2	1455.1079; 1455.1077	1455.11	-2.79; -2.88	-1	5816.42	23	1.28e+06	34.54	23-10945	HexNAc(5)Hex(7)Fuc(2)NeuAc(2)
97.4.2	134377	34.6800	10987	sp|P01042|KNG1_HUMAN Kininogen-1 OS=Homo sapiens OX=9606 GN=KNG1 PE=1 SV=2	P01042	N,M	169,178	169	R.HGIQYFNnNTQHSSLFmLNEVKR.A	HexNAc(5)Hex(7)Fuc(2)NeuAc(2)	Uncertain			AR	d	5816.4018	NGlycan/3024.0733; Oxidation/15.9949	0	d_hIgA-AR-GLTrFASP-FZpipHILIC_16mAbs_E2_step.raw_20240829_noglyc_spec_cut	181.92	1	19100000	3	34.54	4	8,17	162	184	1	24.2	24.2	1455.1077	1455.11	-2.88	-1	5816.42	23	1.28e+06	34.54	23-10987	HexNAc(5)Hex(7)Fuc(2)NeuAc(2)
98	2360; 22138; 22140; 42111; 61132	17.9700; 17.6800; 17.8100; 17.7200; 17.7000	4419; 4894; 4941; 5028; 5037	sp|P01877|IGHA2_HUMAN Immunoglobulin heavy constant alpha 2 OS=Homo sapiens OX=9606 GN=IGHA2 PE=1 SV=4	P01877	N	92	92	K.HYTnSSQDVTVPCR.V	HexNAc(4)Hex(6)NeuAc(1)	Uncertain			SA	a	3738.4748; 3738.4771; 3738.4723; 3738.4786; 3738.4764	NGlycan/2075.7298	2	a_hIgA-SA-GLTrFASP-FZpipHILIC_E2_step.raw_20240829_noglyc_spec_cut; b_hIgA-SA-GLTrFASP-FZpipHILIC_E2_step.raw_20240829_noglyc_spec_cut; c_hIgA-SA-GLTrFASP-FZpipHILIC_E2_step.raw_20240829_noglyc_spec_cut; d_hIgA-SA-GLTrFASP-FZpipHILIC_E2_step.raw_20240829_noglyc_spec_cut	238.38	7.10e-03 - 1.70e-01		2	17.72 - 18.00	3	4	89	102	7.82e-02 - 8.25e-01	78.1 - 164.8	78.1 - 164.8	1247.1656; 1247.1663; 1247.1647; 1247.1668; 1247.1661	1247.16	0.80; 1.41; 0.11; 1.81; 1.21	0	3738.47	1; 4; 7; 10	4.977e+05 - 1.077e+06	17.72 - 18.00	1; 4; 7; 10-4419	HexNAc(4)Hex(6)NeuAc(1)
98.1	22138; 22140	17.6800; 17.8100	4894; 4941	sp|P01877|IGHA2_HUMAN Immunoglobulin heavy constant alpha 2 OS=Homo sapiens OX=9606 GN=IGHA2 PE=1 SV=4	P01877	N	92	92	K.HYTnSSQDVTVPCR.V	HexNAc(4)Hex(6)NeuAc(1)	Uncertain			SA	b	3738.4771; 3738.4723	NGlycan/2075.7298	1	b_hIgA-SA-GLTrFASP-FZpipHILIC_E2_step.raw_20240829_noglyc_spec_cut	179.05	1.03e-01 - 1.09e-01	11100000	2	17.72	3	4	89	102	5.58e-01 - 5.75e-01	86.4 - 116.5	86.4 - 116.5	1247.1663; 1247.1647	1247.16	1.41; 0.11	0	3738.47	4	8.8e+05	17.72	4-4894	HexNAc(4)Hex(6)NeuAc(1)
98.1.2	22140	17.8100	4941	sp|P01877|IGHA2_HUMAN Immunoglobulin heavy constant alpha 2 OS=Homo sapiens OX=9606 GN=IGHA2 PE=1 SV=4	P01877	N	92	92	K.HYTnSSQDVTVPCR.V	HexNAc(4)Hex(6)NeuAc(1)	Uncertain			SA	b	3738.4723	NGlycan/2075.7298	0	b_hIgA-SA-GLTrFASP-FZpipHILIC_E2_step.raw_20240829_noglyc_spec_cut	118.07	0.11	11100000	2	17.72	3	4	89	102	0.58	86.4	86.4	1247.1647	1247.16	0.11	0	3738.47	4	8.8e+05	17.72	4-4941	HexNAc(4)Hex(6)NeuAc(1)
98.2	42111	17.7200	5028	sp|P01877|IGHA2_HUMAN Immunoglobulin heavy constant alpha 2 OS=Homo sapiens OX=9606 GN=IGHA2 PE=1 SV=4	P01877	N	92	92	K.HYTnSSQDVTVPCR.V	HexNAc(4)Hex(6)NeuAc(1)	Uncertain			SA	c	3738.4786	NGlycan/2075.7298	1	c_hIgA-SA-GLTrFASP-FZpipHILIC_E2_step.raw_20240829_noglyc_spec_cut	121.26	0.17	10200000	2	17.76	3	4	89	102	0.83	78.1	78.1	1247.1668	1247.16	1.81	0	3738.47	7	7.92e+05	17.76	7-5028	HexNAc(4)Hex(6)NeuAc(1)
98.3	61132	17.7000	5037	sp|P01877|IGHA2_HUMAN Immunoglobulin heavy constant alpha 2 OS=Homo sapiens OX=9606 GN=IGHA2 PE=1 SV=4	P01877	N	92	92	K.HYTnSSQDVTVPCR.V	HexNAc(4)Hex(6)NeuAc(1)	Uncertain			SA	d	3738.4764	NGlycan/2075.7298	1	d_hIgA-SA-GLTrFASP-FZpipHILIC_E2_step.raw_20240829_noglyc_spec_cut	238.38	0.0071	13500000	2	17.72	3	4	89	102	0.078	164.8	164.8	1247.1661	1247.16	1.21	0	3738.47	10	1.08e+06	17.72	10-5037	HexNAc(4)Hex(6)NeuAc(1)
99	22141; 42113; 42114; 61136	17.8100; 17.8400	4942; 5059; 5071; 5087	sp|P01877|IGHA2_HUMAN Immunoglobulin heavy constant alpha 2 OS=Homo sapiens OX=9606 GN=IGHA2 PE=1 SV=4	P01877	N	92	92	K.HYTnSSQDVTVPCR.V	HexNAc(5)Hex(6)NeuAc(1)	Uncertain			SA	b	3941.5518; 3941.5567; 3941.5519; 3941.5558	NGlycan/2278.8092	2	b_hIgA-SA-GLTrFASP-FZpipHILIC_E2_step.raw_20240829_noglyc_spec_cut; c_hIgA-SA-GLTrFASP-FZpipHILIC_E2_step.raw_20240829_noglyc_spec_cut; d_hIgA-SA-GLTrFASP-FZpipHILIC_E2_step.raw_20240829_noglyc_spec_cut	144.78	3.16e-01 - 8.42e-01		2	17.83 - 17.87	3	4	89	102	9.14e-01 - 9.83e-01	16.9 - 52.3	16.9 - 52.3	1314.8579; 1314.8595; 1314.8579; 1314.8592	1314.86	0.13; 1.38; 0.17; 1.15	0	3941.55	4; 7; 10	7.910e+05 - 1.024e+06	17.83 - 17.87	4; 7; 10-4942	HexNAc(5)Hex(6)NeuAc(1)
99.1	22141	17.8100	4942	sp|P01877|IGHA2_HUMAN Immunoglobulin heavy constant alpha 2 OS=Homo sapiens OX=9606 GN=IGHA2 PE=1 SV=4	P01877	N	92	92	K.HYTnSSQDVTVPCR.V	HexNAc(5)Hex(6)NeuAc(1)	Uncertain			SA	b	3941.5518	NGlycan/2278.8092	1	b_hIgA-SA-GLTrFASP-FZpipHILIC_E2_step.raw_20240829_noglyc_spec_cut	144.78	0.84	10100000	2	17.87	3	4	89	102	0.98	31.7	31.7	1314.8579	1314.86	0.13	0	3941.55	4	7.91e+05	17.87	4-4942	HexNAc(5)Hex(6)NeuAc(1)
99.2	42113; 42114	17.8100; 17.8400	5059; 5071	sp|P01877|IGHA2_HUMAN Immunoglobulin heavy constant alpha 2 OS=Homo sapiens OX=9606 GN=IGHA2 PE=1 SV=4	P01877	N	92	92	K.HYTnSSQDVTVPCR.V	HexNAc(5)Hex(6)NeuAc(1)	Uncertain			SA	c	3941.5567; 3941.5519	NGlycan/2278.8092	1	c_hIgA-SA-GLTrFASP-FZpipHILIC_E2_step.raw_20240829_noglyc_spec_cut	121.19	3.16e-01 - 6.51e-01	11500000	2	17.83	3	4	89	102	9.14e-01 - 9.77e-01	16.9 - 52.3	16.9 - 52.3	1314.8595; 1314.8579	1314.86	1.38; 0.17	0	3941.55	7	1.01e+06	17.83	7-5059	HexNAc(5)Hex(6)NeuAc(1)
99.2.1	42114	17.8400	5071	sp|P01877|IGHA2_HUMAN Immunoglobulin heavy constant alpha 2 OS=Homo sapiens OX=9606 GN=IGHA2 PE=1 SV=4	P01877	N	92	92	K.HYTnSSQDVTVPCR.V	HexNAc(5)Hex(6)NeuAc(1)	Uncertain			SA	c	3941.5519	NGlycan/2278.8092	0	c_hIgA-SA-GLTrFASP-FZpipHILIC_E2_step.raw_20240829_noglyc_spec_cut	121.19	0.65	11500000	2	17.83	3	4	89	102	0.98	52.3	52.3	1314.8579	1314.86	0.17	0	3941.55	7	1.01e+06	17.83	7-5071	HexNAc(5)Hex(6)NeuAc(1)
99.3	61136	17.8400	5087	sp|P01877|IGHA2_HUMAN Immunoglobulin heavy constant alpha 2 OS=Homo sapiens OX=9606 GN=IGHA2 PE=1 SV=4	P01877	N	92	92	K.HYTnSSQDVTVPCR.V	HexNAc(5)Hex(6)NeuAc(1)	Uncertain			SA	d	3941.5558	NGlycan/2278.8092	1	d_hIgA-SA-GLTrFASP-FZpipHILIC_E2_step.raw_20240829_noglyc_spec_cut	113.49	0.75	14200000	2	17.86	3	4	89	102	0.97	19.8	19.8	1314.8592	1314.86	1.15	0	3941.55	10	1.02e+06	17.86	10-5087	HexNAc(5)Hex(6)NeuAc(1)
100	16038; 42193	20.6100; 20.7600	7096; 6133	sp|P01877|IGHA2_HUMAN Immunoglobulin heavy constant alpha 2 OS=Homo sapiens OX=9606 GN=IGHA2 PE=1 SV=4	P01877	N	92	92	K.HYTnSSQDVTVPCR.V	HexNAc(4)Hex(5)Fuc(1)NeuAc(2)	True-positive	Replace N-glycan	HexNAc(4)Hex(5)Fuc(1)NeuAc(2)	SA	b	4014.5816; 4014.5763	NGlycan/2351.8508	2	b_hIgA-SA-GLTrFASP-FZpipHILIC_E1_step.raw_20240829_noglyc_spec_cut; c_hIgA-SA-GLTrFASP-FZpipHILIC_E2_step.raw_20240829_noglyc_spec_cut	595.74	5.71e-08 - 4.73e-05		2	20.59 - 20.59	3	4	89	102	5.99e-07 - 1.12e-03	432.1 - 466.8	0.5 - 5.4	1339.2011; 1339.1994	1339.2	-2.79; -4.09	-1	4014.59	3; 7	8.186e+06 - 2.440e+07	20.59 - 20.59	3; 7-7096	HexNAc(4)Hex(5)Fuc(3)NeuAc(1)
100.1	16038	20.6100	7096	sp|P01877|IGHA2_HUMAN Immunoglobulin heavy constant alpha 2 OS=Homo sapiens OX=9606 GN=IGHA2 PE=1 SV=4	P01877	N	92	92	K.HYTnSSQDVTVPCR.V	HexNAc(4)Hex(5)Fuc(1)NeuAc(2)	True-positive	Replace N-glycan	HexNAc(4)Hex(5)Fuc(1)NeuAc(2)	SA	b	4014.5816	NGlycan/2351.8508	1	b_hIgA-SA-GLTrFASP-FZpipHILIC_E1_step.raw_20240829_noglyc_spec_cut	566.83	5.7e-08	61900000	2	20.59	3	4	89	102	6e-07	432.1	5.4	1339.2011	1339.2	-2.79	-1	4014.59	3	8.19e+06	20.59	3-7096	HexNAc(4)Hex(5)Fuc(3)NeuAc(1)
100.2	42193	20.7600	6133	sp|P01877|IGHA2_HUMAN Immunoglobulin heavy constant alpha 2 OS=Homo sapiens OX=9606 GN=IGHA2 PE=1 SV=4	P01877	N	92	92	K.HYTnSSQDVTVPCR.V	HexNAc(4)Hex(5)Fuc(1)NeuAc(2)	True-positive	Replace N-glycan	HexNAc(4)Hex(5)Fuc(1)NeuAc(2)	SA	c	4014.5763	NGlycan/2351.8508	1	c_hIgA-SA-GLTrFASP-FZpipHILIC_E2_step.raw_20240829_noglyc_spec_cut	595.74	4.7e-05	213000000	2	20.59	3	4	89	102	0.0011	466.8	0.5	1339.1994	1339.2	-4.09	-1	4014.59	7	2.44e+07	20.59	7-6133	HexNAc(4)Hex(5)Fuc(3)NeuAc(1)
101	31331	20.7000	6849	sp|P0DOX2|IGA2_HUMAN Immunoglobulin alpha-2 heavy chain OS=Homo sapiens OX=9606 PE=1 SV=2	P0DOX2	N	207	207	K.HYTnSSQDVTVPCR.V	HexNAc(4)Hex(5)Fuc(1)NeuAc(2)	True-positive	Replace N-glycan	HexNAc(4)Hex(5)Fuc(1)NeuAc(2)	SA	c	4014.5805	NGlycan/2351.8508	1	c_hIgA-SA-GLTrFASP-FZpipHILIC_D_step.raw_20240829_noglyc_spec_cut	507.26	4.9e-05	10300000	2	20.62	3	4	204	217	0.00047	359.5	5.7	1339.2008	1339.2	-3.05	-1	4014.59	5	1.27e+06	20.62	5-6849	HexNAc(4)Hex(5)Fuc(3)NeuAc(1)
102	61652	29.4000	9482	sp|P01877|IGHA2_HUMAN Immunoglobulin heavy constant alpha 2 OS=Homo sapiens OX=9606 GN=IGHA2 PE=1 SV=4	P01877	N	92	92	K.HYTnSSQDVTVPCRVPPPPPCCHPR.L	HexNAc(4)Hex(5)	Uncertain			SA	d	4579.9154	NGlycan/1622.5816	1	d_hIgA-SA-GLTrFASP-FZpipHILIC_E2_step.raw_20240829_noglyc_spec_cut	124.55	1	9480000	2	29.35	4	4	89	113	1	88.3	11.1	1145.9861	1145.99	-3.18	0	4579.93	10	1.4e+06	29.35	10-9482	HexNAc(4)Hex(5)
103	22680	29.1800	9185	sp|P01877|IGHA2_HUMAN Immunoglobulin heavy constant alpha 2 OS=Homo sapiens OX=9606 GN=IGHA2 PE=1 SV=4	P01877	N	92	92	K.HYTnSSQDVTVPCRVPPPPPCCHPR.L	HexNAc(6)Hex(7)Fuc(3)NeuAc(2)	Uncertain			SA	b	6330.5895	NGlycan/3373.2106	1	b_hIgA-SA-GLTrFASP-FZpipHILIC_E2_step.raw_20240829_noglyc_spec_cut	115.56	1	24500000	3	28.98	5	4	89	113	1	115.6	115.6	1267.1252	1267.12	4.83	0	6330.56	4	1.74e+06	28.98	4-9185	HexNAc(6)Hex(7)Fuc(3)NeuAc(2)
104	3180; 22665; 22788; 42632; 42781; 42950; 61623	32.3900; 28.9700; 30.4200; 28.9800; 30.5900; 32.2300; 28.9600	9877; 9102; 9655; 9210; 9825; 10442; 9310	sp|P01877|IGHA2_HUMAN Immunoglobulin heavy constant alpha 2 OS=Homo sapiens OX=9606 GN=IGHA2 PE=1 SV=4	P01877	N,Q	92,95	92	K.HYTnSSqDVTVPCRVPPPPPCCHPR.L	HexNAc(4)Hex(4)Fuc(1)	Uncertain			SA	a	4564.9206; 4564.9018; 4564.8988; 4564.9122; 4564.9004; 4564.9190; 4564.9038	NGlycan/1606.5867; Deamidated/0.9840	2	a_hIgA-SA-GLTrFASP-FZpipHILIC_E2_step.raw_20240829_noglyc_spec_cut; b_hIgA-SA-GLTrFASP-FZpipHILIC_E2_step.raw_20240829_noglyc_spec_cut; c_hIgA-SA-GLTrFASP-FZpipHILIC_E2_step.raw_20240829_noglyc_spec_cut; d_hIgA-SA-GLTrFASP-FZpipHILIC_E2_step.raw_20240829_noglyc_spec_cut	136.52	1.00e+00 - 1.00e+00		0	28.82 - 32.48	4	4,7	89	113	1.00e+00 - 1.00e+00	13.8 - 68.0	6.7 - 68.0	1142.2374; 1142.2327; 1142.2320; 1142.2353; 1142.2324; 1142.2370; 1142.2332	1142.24	0.33; -3.79; -4.44; -1.50; -4.08; -0.01; -3.34	-1 - 1	4564.92	1; 4; 7; 10	0.000e+00 - 8.539e+05	28.82 - 32.48	1; 4; 7; 10-9877	HexNAc(4)Hex(4)Fuc(1)
104.1	22665; 22788	28.9700; 30.4200	9102; 9655	sp|P01877|IGHA2_HUMAN Immunoglobulin heavy constant alpha 2 OS=Homo sapiens OX=9606 GN=IGHA2 PE=1 SV=4	P01877	N,Q	92,95	92	K.HYTnSSqDVTVPCRVPPPPPCCHPR.L	HexNAc(4)Hex(4)Fuc(1)	Uncertain			SA	b	4564.9018; 4564.8988	NGlycan/1606.5867; Deamidated/0.9840	1	b_hIgA-SA-GLTrFASP-FZpipHILIC_E2_step.raw_20240829_noglyc_spec_cut	123.04	1.00e+00 - 1.00e+00	0	0	28.82	4	4,7	89	113	1.00e+00 - 1.00e+00	27.6 - 30.0	27.6 - 30.0	1142.2327; 1142.2320	1142.24	-3.79; -4.44	1	4564.92	4	0	28.82	4-9102	HexNAc(4)Hex(4)Fuc(1)
104.2	42632; 42781; 42950	28.9800; 30.5900; 32.2300	9210; 9825; 10442	sp|P01877|IGHA2_HUMAN Immunoglobulin heavy constant alpha 2 OS=Homo sapiens OX=9606 GN=IGHA2 PE=1 SV=4	P01877	N,Q	92,95	92	K.HYTnSSqDVTVPCRVPPPPPCCHPR.L	HexNAc(4)Hex(4)Fuc(1)	Uncertain			SA	c	4564.9122; 4564.9004; 4564.9190	NGlycan/1606.5867; Deamidated/0.9840	1	c_hIgA-SA-GLTrFASP-FZpipHILIC_E2_step.raw_20240829_noglyc_spec_cut	136.52	1.00e+00 - 1.00e+00	3800000	0	32.25	4	4,7	89	113	1.00e+00 - 1.00e+00	13.8 - 68.0	13.8 - 68.0	1142.2353; 1142.2324; 1142.2370	1142.24	-1.50; -4.08; -0.01	-1 - 1	4564.92	7	6.82e+05	32.25	7-9210	HexNAc(4)Hex(4)Fuc(1)
104.2.2	42950	32.2300	10442	sp|P01877|IGHA2_HUMAN Immunoglobulin heavy constant alpha 2 OS=Homo sapiens OX=9606 GN=IGHA2 PE=1 SV=4	P01877	N,Q	92,95	92	K.HYTnSSqDVTVPCRVPPPPPCCHPR.L	HexNAc(4)Hex(4)Fuc(1)	Uncertain			SA	c	4564.9190	NGlycan/1606.5867; Deamidated/0.9840	0	c_hIgA-SA-GLTrFASP-FZpipHILIC_E2_step.raw_20240829_noglyc_spec_cut	113.3	1	3800000	0	32.25	4	4,7	89	113	1	63.8	22.2	1142.2370	1142.24	-0.01	-1	4564.92	7	6.82e+05	32.25	7-10442	HexNAc(4)Hex(4)Fuc(1)
105	85327	34.9200	10694	sp|P0DOX2|IGA2_HUMAN Immunoglobulin alpha-2 heavy chain OS=Homo sapiens OX=9606 PE=1 SV=2	P0DOX2	N	207	207	K.HYTnSSQDVTVPCRVPPPPPCCHPR.L	HexNAc(4)Hex(5)NeuAc(1)	Uncertain			AR	a	4871.0489	NGlycan/1913.6770	1	a_hIgA-AR-GLTrFASP-FZpipHILIC_8mAbs_E2_step.raw_20240829_noglyc_spec_cut	138.68	1	15800000	2	34.91	4	4	204	228	1	12.6	12.6	1218.7695	1218.76	4.82	-1	4871.03	14	1.76e+06	34.91	14-10694	HexNAc(4)Hex(5)NeuAc(1)
106	84952; 85010; 85075; 85083; 101215; 101220; 101271; 101333; 118171; 118177; 118184; 118193; 118220; 118261; 118263; 133951; 133972; 134077; 134078	31.7400; 32.2500; 32.7000; 32.7800; 31.6700; 31.7000; 32.1800; 32.6000; 31.3000; 31.4200; 31.6100; 31.7700; 32.1200; 32.4800; 32.4900; 31.2000; 31.5100; 32.4000; 32.4300	9489; 9684; 9860; 9888; 10345; 10358; 10536; 10699; 10350; 10394; 10463; 10523; 10640; 10772; 10776; 9653; 9773; 10113; 10124	sp|P0DOX2|IGA2_HUMAN Immunoglobulin alpha-2 heavy chain OS=Homo sapiens OX=9606 PE=1 SV=2	P0DOX2	N	207	207	K.HYTnSSQDVTVPCRVPPPPPCCHPR.L	HexNAc(5)Hex(3)Fuc(2)NeuAc(1)	Uncertain			AR	a	5042.0910; 5042.0912; 5042.0890; 5042.0919; 5042.0920; 5042.0921; 5042.0910; 5042.0892; 5042.0934; 5042.0935; 5042.0920; 5042.0893; 5042.0893; 5042.0886; 5042.0910; 5042.0939; 5042.0943; 5042.0971; 5042.0911	NGlycan/2084.7666	2	a_hIgA-AR-GLTrFASP-FZpipHILIC_8mAbs_E2_step.raw_20240829_noglyc_spec_cut; b_hIgA-AR-GLTrFASP-FZpipHILIC_11mAbs_E2_step.raw_20240829_noglyc_spec_cut; c_hIgA-AR-GLTrFASP-FZpipHILIC_16mAbs_E2_step.raw_20240829_noglyc_spec_cut; d_hIgA-AR-GLTrFASP-FZpipHILIC_16mAbs_E2_step.raw_20240829_noglyc_spec_cut	155.03	9.99e-01 - 1.00e+00		3	31.36 - 31.76	4	4	204	228	1.00e+00 - 1.00e+00	4.9 - 124.1	4.9 - 34.0	1261.5300; 1261.5301; 1261.5295; 1261.5303; 1261.5303; 1261.5303; 1261.5300; 1261.5296; 1261.5306; 1261.5306; 1261.5303; 1261.5296; 1261.5296; 1261.5294; 1261.5300; 1261.5308; 1261.5309; 1261.5315; 1261.5301	1261.54	-4.74; -4.70; -5.14; -4.55; -4.54; -4.53; -4.74; -5.10; -4.27; -4.25; -4.53; -5.07; -5.08; -5.22; -4.74; -4.16; -4.08; -3.54; -4.72	0 - 1	5042.11	14; 17; 20; 23	2.217e+06 - 7.113e+06	31.36 - 31.76	14; 17; 20; 23-9489	HexNAc(5)Hex(3)Fuc(2)NeuAc(1)
106.1	84952; 85010; 85075; 85083	31.7400; 32.2500; 32.7000; 32.7800	9489; 9684; 9860; 9888	sp|P0DOX2|IGA2_HUMAN Immunoglobulin alpha-2 heavy chain OS=Homo sapiens OX=9606 PE=1 SV=2	P0DOX2	N	207	207	K.HYTnSSQDVTVPCRVPPPPPCCHPR.L	HexNAc(5)Hex(3)Fuc(2)NeuAc(1)	Uncertain			AR	a	5042.0910; 5042.0912; 5042.0890; 5042.0919	NGlycan/2084.7666	1	a_hIgA-AR-GLTrFASP-FZpipHILIC_8mAbs_E2_step.raw_20240829_noglyc_spec_cut	107.92	1.00e+00 - 1.00e+00	155000000	3	31.76	4	4	204	228	1.00e+00 - 1.00e+00	35.9 - 85.3	6.1 - 24.1	1261.5300; 1261.5301; 1261.5295; 1261.5303	1261.54	-4.74; -4.70; -5.14; -4.55	1	5042.11	14	6.7e+06	31.76	14-9489	HexNAc(5)Hex(3)Fuc(2)NeuAc(1)
106.2	101215; 101220; 101271; 101333	31.6700; 31.7000; 32.1800; 32.6000	10345; 10358; 10536; 10699	sp|P0DOX2|IGA2_HUMAN Immunoglobulin alpha-2 heavy chain OS=Homo sapiens OX=9606 PE=1 SV=2	P0DOX2	N	207	207	K.HYTnSSQDVTVPCRVPPPPPCCHPR.L	HexNAc(5)Hex(3)Fuc(2)NeuAc(1)	Uncertain			AR	b	5042.0920; 5042.0921; 5042.0910; 5042.0892	NGlycan/2084.7666	1	b_hIgA-AR-GLTrFASP-FZpipHILIC_11mAbs_E2_step.raw_20240829_noglyc_spec_cut	106.41	9.99e-01 - 1.00e+00	152000000	3	31.73	4	4	204	228	1.00e+00 - 1.00e+00	4.9 - 106.4	4.9 - 32.7	1261.5303; 1261.5303; 1261.5300; 1261.5296	1261.54	-4.54; -4.53; -4.74; -5.10	0 - 1	5042.11	17	6.97e+06	31.73	17-10345	HexNAc(5)Hex(3)Fuc(2)NeuAc(1)
106.2.1	101220	31.7000	10358	sp|P0DOX2|IGA2_HUMAN Immunoglobulin alpha-2 heavy chain OS=Homo sapiens OX=9606 PE=1 SV=2	P0DOX2	N	207	207	K.HYTnSSQDVTVPCRVPPPPPCCHPR.L	HexNAc(5)Hex(3)Fuc(2)NeuAc(1)	Uncertain			AR	b	5042.0921	NGlycan/2084.7666	0	b_hIgA-AR-GLTrFASP-FZpipHILIC_11mAbs_E2_step.raw_20240829_noglyc_spec_cut	106.41	1	152000000	3	31.73	4	4	204	228	1	106.4	32.7	1261.5303	1261.54	-4.53	1	5042.11	17	6.97e+06	31.73	17-10358	HexNAc(5)Hex(3)Fuc(2)NeuAc(1)
106.3	118171; 118177; 118184; 118193; 118220; 118261; 118263	31.3000; 31.4200; 31.6100; 31.7700; 32.1200; 32.4800; 32.4900	10350; 10394; 10463; 10523; 10640; 10772; 10776	sp|P0DOX2|IGA2_HUMAN Immunoglobulin alpha-2 heavy chain OS=Homo sapiens OX=9606 PE=1 SV=2	P0DOX2	N	207	207	K.HYTnSSQDVTVPCRVPPPPPCCHPR.L	HexNAc(5)Hex(3)Fuc(2)NeuAc(1)	Uncertain			AR	c	5042.0934; 5042.0935; 5042.0920; 5042.0893; 5042.0893; 5042.0886; 5042.0910	NGlycan/2084.7666	1	c_hIgA-AR-GLTrFASP-FZpipHILIC_16mAbs_E2_step.raw_20240829_noglyc_spec_cut	155.03	1.00e+00 - 1.00e+00	66900000	3	31.36	4	4	204	228	1.00e+00 - 1.00e+00	60.6 - 122.6	16.5 - 26.8	1261.5306; 1261.5306; 1261.5303; 1261.5296; 1261.5296; 1261.5294; 1261.5300	1261.54	-4.27; -4.25; -4.53; -5.07; -5.08; -5.22; -4.74	0 - 1	5042.11	20	2.22e+06	31.36	20-10350	HexNAc(5)Hex(3)Fuc(2)NeuAc(1)
106.3.2	118177	31.4200	10394	sp|P0DOX2|IGA2_HUMAN Immunoglobulin alpha-2 heavy chain OS=Homo sapiens OX=9606 PE=1 SV=2	P0DOX2	N	207	207	K.HYTnSSQDVTVPCRVPPPPPCCHPR.L	HexNAc(5)Hex(3)Fuc(2)NeuAc(1)	Uncertain			AR	c	5042.0935	NGlycan/2084.7666	0	c_hIgA-AR-GLTrFASP-FZpipHILIC_16mAbs_E2_step.raw_20240829_noglyc_spec_cut	112.36	1	66900000	3	31.36	4	4	204	228	1	112.4	26.8	1261.5306	1261.54	-4.25	1	5042.11	20	2.22e+06	31.36	20-10394	HexNAc(5)Hex(3)Fuc(2)NeuAc(1)
106.3.3	118184	31.6100	10463	sp|P0DOX2|IGA2_HUMAN Immunoglobulin alpha-2 heavy chain OS=Homo sapiens OX=9606 PE=1 SV=2	P0DOX2	N	207	207	K.HYTnSSQDVTVPCRVPPPPPCCHPR.L	HexNAc(5)Hex(3)Fuc(2)NeuAc(1)	Uncertain			AR	c	5042.0920	NGlycan/2084.7666	0	c_hIgA-AR-GLTrFASP-FZpipHILIC_16mAbs_E2_step.raw_20240829_noglyc_spec_cut	120.09	1	66900000	3	31.36	4	4	204	228	1	106.7	24.8	1261.5303	1261.54	-4.53	0	5042.11	20	2.22e+06	31.36	20-10463	HexNAc(5)Hex(3)Fuc(2)NeuAc(1)
106.3.4	118193	31.7700	10523	sp|P0DOX2|IGA2_HUMAN Immunoglobulin alpha-2 heavy chain OS=Homo sapiens OX=9606 PE=1 SV=2	P0DOX2	N	207	207	K.HYTnSSQDVTVPCRVPPPPPCCHPR.L	HexNAc(5)Hex(3)Fuc(2)NeuAc(1)	Uncertain			AR	c	5042.0893	NGlycan/2084.7666	0	c_hIgA-AR-GLTrFASP-FZpipHILIC_16mAbs_E2_step.raw_20240829_noglyc_spec_cut	145.37	1	66900000	3	31.36	4	4	204	228	1	115.9	24.5	1261.5296	1261.54	-5.07	1	5042.11	20	2.22e+06	31.36	20-10523	HexNAc(5)Hex(3)Fuc(2)NeuAc(1)
106.3.5	118220	32.1200	10640	sp|P0DOX2|IGA2_HUMAN Immunoglobulin alpha-2 heavy chain OS=Homo sapiens OX=9606 PE=1 SV=2	P0DOX2	N	207	207	K.HYTnSSQDVTVPCRVPPPPPCCHPR.L	HexNAc(5)Hex(3)Fuc(2)NeuAc(1)	Uncertain			AR	c	5042.0893	NGlycan/2084.7666	0	c_hIgA-AR-GLTrFASP-FZpipHILIC_16mAbs_E2_step.raw_20240829_noglyc_spec_cut	131.64	1	66900000	3	31.36	4	4	204	228	1	83.0	16.5	1261.5296	1261.54	-5.08	1	5042.11	20	2.22e+06	31.36	20-10640	HexNAc(5)Hex(3)Fuc(2)NeuAc(1)
106.3.6	118261	32.4800	10772	sp|P0DOX2|IGA2_HUMAN Immunoglobulin alpha-2 heavy chain OS=Homo sapiens OX=9606 PE=1 SV=2	P0DOX2	N	207	207	K.HYTnSSQDVTVPCRVPPPPPCCHPR.L	HexNAc(5)Hex(3)Fuc(2)NeuAc(1)	Uncertain			AR	c	5042.0886	NGlycan/2084.7666	0	c_hIgA-AR-GLTrFASP-FZpipHILIC_16mAbs_E2_step.raw_20240829_noglyc_spec_cut	122.6	1	66900000	3	31.36	4	4	204	228	1	122.6	25.9	1261.5294	1261.54	-5.22	1	5042.11	20	2.22e+06	31.36	20-10772	HexNAc(5)Hex(3)Fuc(2)NeuAc(1)
106.4	133951; 133972; 134077; 134078	31.2000; 31.5100; 32.4000; 32.4300	9653; 9773; 10113; 10124	sp|P0DOX2|IGA2_HUMAN Immunoglobulin alpha-2 heavy chain OS=Homo sapiens OX=9606 PE=1 SV=2	P0DOX2	N	207	207	K.HYTnSSQDVTVPCRVPPPPPCCHPR.L	HexNAc(5)Hex(3)Fuc(2)NeuAc(1)	Uncertain			AR	d	5042.0939; 5042.0943; 5042.0971; 5042.0911	NGlycan/2084.7666	1	d_hIgA-AR-GLTrFASP-FZpipHILIC_16mAbs_E2_step.raw_20240829_noglyc_spec_cut	143.19	1.00e+00 - 1.00e+00	239000000	3	31.53	4	4	204	228	1.00e+00 - 1.00e+00	32.8 - 124.1	15.3 - 34.0	1261.5308; 1261.5309; 1261.5315; 1261.5301	1261.54	-4.16; -4.08; -3.54; -4.72	0 - 1	5042.11	23	7.11e+06	31.53	23-9653	HexNAc(5)Hex(3)Fuc(2)NeuAc(1)
107	84753; 84805; 101023; 101248; 118004; 118102; 133793	29.8400; 30.3900; 29.9400; 31.9800; 29.7100; 30.6100; 29.7700	8756; 8969; 9681; 10461; 9745; 10089; 9102	sp|P0DOX2|IGA2_HUMAN Immunoglobulin alpha-2 heavy chain OS=Homo sapiens OX=9606 PE=1 SV=2	P0DOX2	N,Q	207,210	207	K.HYTnSSqDVTVPCRVPPPPPCCHPR.L	HexNAc(4)Hex(4)Fuc(1)	Uncertain			AR	a	4564.8949; 4564.9155; 4564.8951; 4564.9138; 4564.8957; 4564.9216; 4564.9014	NGlycan/1606.5867; Deamidated/0.9840	2	a_hIgA-AR-GLTrFASP-FZpipHILIC_8mAbs_E2_step.raw_20240829_noglyc_spec_cut; b_hIgA-AR-GLTrFASP-FZpipHILIC_11mAbs_E2_step.raw_20240829_noglyc_spec_cut; c_hIgA-AR-GLTrFASP-FZpipHILIC_16mAbs_E2_step.raw_20240829_noglyc_spec_cut; d_hIgA-AR-GLTrFASP-FZpipHILIC_16mAbs_E2_step.raw_20240829_noglyc_spec_cut	184.52	1.00e+00 - 1.00e+00		0	29.63 - 31.97	4	4,7	204	228	1.00e+00 - 1.00e+00	4.5 - 144.0	4.5 - 144.0	1142.2310; 1142.2362; 1142.2310; 1142.2357; 1142.2312; 1142.2377; 1142.2326	1142.24	-5.28; -0.77; -5.25; -1.14; -5.12; 0.56; -3.86	0 - 1	4564.92	14; 17; 20; 23	0.000e+00 - 3.767e+05	29.63 - 31.97	14; 17; 20; 23-8756	HexNAc(4)Hex(4)Fuc(1)
107.1	84753; 84805	29.8400; 30.3900	8756; 8969	sp|P0DOX2|IGA2_HUMAN Immunoglobulin alpha-2 heavy chain OS=Homo sapiens OX=9606 PE=1 SV=2	P0DOX2	N,Q	207,210	207	K.HYTnSSqDVTVPCRVPPPPPCCHPR.L	HexNAc(4)Hex(4)Fuc(1)	Uncertain			AR	a	4564.8949; 4564.9155	NGlycan/1606.5867; Deamidated/0.9840	1	a_hIgA-AR-GLTrFASP-FZpipHILIC_8mAbs_E2_step.raw_20240829_noglyc_spec_cut	109.18	1.00e+00 - 1.00e+00	0	0	29.63	4	4,7	204	228	1.00e+00 - 1.00e+00	26.4 - 79.1	26.4 - 79.1	1142.2310; 1142.2362	1142.24	-5.28; -0.77	1	4564.92	14	0	29.63	14-8756	HexNAc(4)Hex(4)Fuc(1)
107.1.2	84805	30.3900	8969	sp|P0DOX2|IGA2_HUMAN Immunoglobulin alpha-2 heavy chain OS=Homo sapiens OX=9606 PE=1 SV=2	P0DOX2	N,Q	207,210	207	K.HYTnSSqDVTVPCRVPPPPPCCHPR.L	HexNAc(4)Hex(4)Fuc(1)	Uncertain			AR	a	4564.9155	NGlycan/1606.5867; Deamidated/0.9840	0	a_hIgA-AR-GLTrFASP-FZpipHILIC_8mAbs_E2_step.raw_20240829_noglyc_spec_cut	107.8	1	0	0	29.63	4	4,7	204	228	1	79.1	79.1	1142.2362	1142.24	-0.77	1	4564.92	14	0	29.63	14-8969	HexNAc(4)Hex(4)Fuc(1)
107.2	101023; 101248	29.9400; 31.9800	9681; 10461	sp|P0DOX2|IGA2_HUMAN Immunoglobulin alpha-2 heavy chain OS=Homo sapiens OX=9606 PE=1 SV=2	P0DOX2	N,Q	207,210	207	K.HYTnSSqDVTVPCRVPPPPPCCHPR.L	HexNAc(4)Hex(4)Fuc(1)	Uncertain			AR	b	4564.8951; 4564.9138	NGlycan/1606.5867; Deamidated/0.9840	1	b_hIgA-AR-GLTrFASP-FZpipHILIC_11mAbs_E2_step.raw_20240829_noglyc_spec_cut	184.52	1.00e+00 - 1.00e+00	1860000	0	31.97	4	4,7	204	228	1.00e+00 - 1.00e+00	18.6 - 144.0	18.6 - 144.0	1142.2310; 1142.2357	1142.24	-5.25; -1.14	1	4564.92	17	3.77e+05	31.97	17-9681	HexNAc(4)Hex(4)Fuc(1)
107.2.1	101248	31.9800	10461	sp|P0DOX2|IGA2_HUMAN Immunoglobulin alpha-2 heavy chain OS=Homo sapiens OX=9606 PE=1 SV=2	P0DOX2	N,Q	207,210	207	K.HYTnSSqDVTVPCRVPPPPPCCHPR.L	HexNAc(4)Hex(4)Fuc(1)	Uncertain			AR	b	4564.9138	NGlycan/1606.5867; Deamidated/0.9840	0	b_hIgA-AR-GLTrFASP-FZpipHILIC_11mAbs_E2_step.raw_20240829_noglyc_spec_cut	184.52	1	1860000	0	31.97	4	4,7	204	228	1	144.0	144.0	1142.2357	1142.24	-1.14	1	4564.92	17	3.77e+05	31.97	17-10461	HexNAc(4)Hex(4)Fuc(1)
107.3	118004; 118102	29.7100; 30.6100	9745; 10089	sp|P0DOX2|IGA2_HUMAN Immunoglobulin alpha-2 heavy chain OS=Homo sapiens OX=9606 PE=1 SV=2	P0DOX2	N,Q	207,210	207	K.HYTnSSqDVTVPCRVPPPPPCCHPR.L	HexNAc(4)Hex(4)Fuc(1)	Uncertain			AR	c	4564.8957; 4564.9216	NGlycan/1606.5867; Deamidated/0.9840	1	c_hIgA-AR-GLTrFASP-FZpipHILIC_16mAbs_E2_step.raw_20240829_noglyc_spec_cut	115.96	1.00e+00 - 1.00e+00	112000	0	30.27	4	4,7	204	228	1.00e+00 - 1.00e+00	4.5 - 10.6	4.5 - 10.6	1142.2312; 1142.2377	1142.24	-5.12; 0.56	1	4564.92	20	7.12e+04	30.27	20-9745	HexNAc(4)Hex(4)Fuc(1)
107.4	133793	29.7700	9102	sp|P0DOX2|IGA2_HUMAN Immunoglobulin alpha-2 heavy chain OS=Homo sapiens OX=9606 PE=1 SV=2	P0DOX2	N,Q	207,210	207	K.HYTnSSqDVTVPCRVPPPPPCCHPR.L	HexNAc(4)Hex(4)Fuc(1)	Uncertain			AR	d	4564.9014	NGlycan/1606.5867; Deamidated/0.9840	1	d_hIgA-AR-GLTrFASP-FZpipHILIC_16mAbs_E2_step.raw_20240829_noglyc_spec_cut	119.17	1	264000	0	29.74	4	4,7	204	228	1	59.3	59.3	1142.2326	1142.24	-3.86	0	4564.92	23	1.9e+05	29.74	23-9102	HexNAc(4)Hex(4)Fuc(1)
108	84965; 84971; 101230; 101272	31.8600; 31.9100; 31.8400; 32.1900	9535; 9556; 10409; 10539	sp|P0DOX2|IGA2_HUMAN Immunoglobulin alpha-2 heavy chain OS=Homo sapiens OX=9606 PE=1 SV=2	P0DOX2	N,Q	207,210	207	K.HYTnSSqDVTVPCRVPPPPPCCHPR.L	HexNAc(5)Hex(6)	Uncertain			AR	a	4946.0552; 4946.0640; 4946.0602; 4946.0488	NGlycan/1987.7138; Deamidated/0.9840	2	a_hIgA-AR-GLTrFASP-FZpipHILIC_8mAbs_E2_step.raw_20240829_noglyc_spec_cut; b_hIgA-AR-GLTrFASP-FZpipHILIC_11mAbs_E2_step.raw_20240829_noglyc_spec_cut	122.97	9.99e-01 - 1.00e+00		0	31.95 - 32.34	4	4,7	204	228	1.00e+00 - 1.00e+00	7.5 - 73.3	7.5 - 42.9	1237.5211; 1237.5233; 1237.5223; 1237.5195	1237.52	1.84; 3.62; 2.84; 0.54	-1	4946.05	14; 17	7.830e+05 - 9.749e+05	31.95 - 32.34	14; 17-9535	HexNAc(5)Hex(6)
108.1	84965; 84971	31.8600; 31.9100	9535; 9556	sp|P0DOX2|IGA2_HUMAN Immunoglobulin alpha-2 heavy chain OS=Homo sapiens OX=9606 PE=1 SV=2	P0DOX2	N,Q	207,210	207	K.HYTnSSqDVTVPCRVPPPPPCCHPR.L	HexNAc(5)Hex(6)	Uncertain			AR	a	4946.0552; 4946.0640	NGlycan/1987.7138; Deamidated/0.9840	1	a_hIgA-AR-GLTrFASP-FZpipHILIC_8mAbs_E2_step.raw_20240829_noglyc_spec_cut	122.97	1.00e+00 - 1.00e+00	10800000	0	31.95	4	4,7	204	228	1.00e+00 - 1.00e+00	7.5 - 73.3	7.5 - 31.8	1237.5211; 1237.5233	1237.52	1.84; 3.62	-1	4946.05	14	7.83e+05	31.95	14-9535	HexNAc(5)Hex(6)
108.1.1	84971	31.9100	9556	sp|P0DOX2|IGA2_HUMAN Immunoglobulin alpha-2 heavy chain OS=Homo sapiens OX=9606 PE=1 SV=2	P0DOX2	N,Q	207,210	207	K.HYTnSSqDVTVPCRVPPPPPCCHPR.L	HexNAc(5)Hex(6)	Uncertain			AR	a	4946.0640	NGlycan/1987.7138; Deamidated/0.9840	0	a_hIgA-AR-GLTrFASP-FZpipHILIC_8mAbs_E2_step.raw_20240829_noglyc_spec_cut	122.97	1	10800000	0	31.95	4	4,7	204	228	1	73.3	31.8	1237.5233	1237.52	3.62	-1	4946.05	14	7.83e+05	31.95	14-9556	HexNAc(5)Hex(6)
109	84930; 101193; 101233; 101340; 133956; 133987; 134015	31.4400; 31.4000; 31.8800; 32.6400; 31.2400; 31.7100; 32.0000	9375; 10245; 10424; 10713; 9668; 9849; 9960	sp|P0DOX2|IGA2_HUMAN Immunoglobulin alpha-2 heavy chain OS=Homo sapiens OX=9606 PE=1 SV=2	P0DOX2	N,Q	207,210	207	K.HYTnSSqDVTVPCRVPPPPPCCHPR.L	HexNAc(5)Hex(3)Fuc(2)NeuAc(1)	Uncertain			AR	a	5043.0916; 5043.0942; 5043.0838; 5043.0916; 5043.0988; 5043.0988; 5043.0917	NGlycan/2084.7666; Deamidated/0.9840	2	a_hIgA-AR-GLTrFASP-FZpipHILIC_8mAbs_E2_step.raw_20240829_noglyc_spec_cut; b_hIgA-AR-GLTrFASP-FZpipHILIC_11mAbs_E2_step.raw_20240829_noglyc_spec_cut; d_hIgA-AR-GLTrFASP-FZpipHILIC_16mAbs_E2_step.raw_20240829_noglyc_spec_cut	181.88	1.00e+00 - 1.00e+00		0	31.45 - 31.73	4	4,7	204	228	1.00e+00 - 1.00e+00	32.2 - 138.6	3.2 - 131.3	1261.7802; 1261.7808; 1261.7782; 1261.7802; 1261.7820; 1261.7820; 1261.7802	1261.78	-1.45; -0.93; -3.01; -1.46; -0.02; -0.02; -1.44	-1 - 0	5043.1	14; 17; 23	2.123e+06 - 2.850e+06	31.45 - 31.73	14; 17; 23-9375	HexNAc(5)Hex(3)Fuc(2)NeuAc(1)
109.1	84930	31.4400	9375	sp|P0DOX2|IGA2_HUMAN Immunoglobulin alpha-2 heavy chain OS=Homo sapiens OX=9606 PE=1 SV=2	P0DOX2	N,Q	207,210	207	K.HYTnSSqDVTVPCRVPPPPPCCHPR.L	HexNAc(5)Hex(3)Fuc(2)NeuAc(1)	Uncertain			AR	a	5043.0916	NGlycan/2084.7666; Deamidated/0.9840	1	a_hIgA-AR-GLTrFASP-FZpipHILIC_8mAbs_E2_step.raw_20240829_noglyc_spec_cut	143.73	1	15000000	0	31.45	4	4,7	204	228	1	131.3	131.3	1261.7802	1261.78	-1.45	0	5043.1	14	2.12e+06	31.45	14-9375	HexNAc(5)Hex(3)Fuc(2)NeuAc(1)
109.2	101193; 101233; 101340	31.4000; 31.8800; 32.6400	10245; 10424; 10713	sp|P0DOX2|IGA2_HUMAN Immunoglobulin alpha-2 heavy chain OS=Homo sapiens OX=9606 PE=1 SV=2	P0DOX2	N,Q	207,210	207	K.HYTnSSqDVTVPCRVPPPPPCCHPR.L	HexNAc(5)Hex(3)Fuc(2)NeuAc(1)	Uncertain			AR	b	5043.0942; 5043.0838; 5043.0916	NGlycan/2084.7666; Deamidated/0.9840	1	b_hIgA-AR-GLTrFASP-FZpipHILIC_11mAbs_E2_step.raw_20240829_noglyc_spec_cut	167.73	1.00e+00 - 1.00e+00	59900000	0	31.73	4	4,7	204	228	1.00e+00 - 1.00e+00	32.2 - 105.8	3.2 - 55.1	1261.7808; 1261.7782; 1261.7802	1261.78	-0.93; -3.01; -1.46	-1 - 0	5043.1	17	2.48e+06	31.73	17-10245	HexNAc(5)Hex(3)Fuc(2)NeuAc(1)
109.3	133956; 133987; 134015	31.2400; 31.7100; 32.0000	9668; 9849; 9960	sp|P0DOX2|IGA2_HUMAN Immunoglobulin alpha-2 heavy chain OS=Homo sapiens OX=9606 PE=1 SV=2	P0DOX2	N,Q	207,210	207	K.HYTnSSqDVTVPCRVPPPPPCCHPR.L	HexNAc(5)Hex(3)Fuc(2)NeuAc(1)	Uncertain			AR	d	5043.0988; 5043.0988; 5043.0917	NGlycan/2084.7666; Deamidated/0.9840	1	d_hIgA-AR-GLTrFASP-FZpipHILIC_16mAbs_E2_step.raw_20240829_noglyc_spec_cut	181.88	1.00e+00 - 1.00e+00	57400000	0	31.55	4	4,7	204	228	1.00e+00 - 1.00e+00	40.3 - 138.6	5.0 - 40.3	1261.7820; 1261.7820; 1261.7802	1261.78	-0.02; -0.02; -1.44	0	5043.1	23	2.85e+06	31.55	23-9668	HexNAc(5)Hex(3)Fuc(2)NeuAc(1)
109.3.2	133987	31.7100	9849	sp|P0DOX2|IGA2_HUMAN Immunoglobulin alpha-2 heavy chain OS=Homo sapiens OX=9606 PE=1 SV=2	P0DOX2	N,Q	207,210	207	K.HYTnSSqDVTVPCRVPPPPPCCHPR.L	HexNAc(5)Hex(3)Fuc(2)NeuAc(1)	Uncertain			AR	d	5043.0988	NGlycan/2084.7666; Deamidated/0.9840	0	d_hIgA-AR-GLTrFASP-FZpipHILIC_16mAbs_E2_step.raw_20240829_noglyc_spec_cut	143.96	1	57400000	0	31.55	4	4,7	204	228	1	80.8	5.0	1261.7820	1261.78	-0.02	0	5043.1	23	2.85e+06	31.55	23-9849	HexNAc(5)Hex(3)Fuc(2)NeuAc(1)
110	22731; 23539; 43562; 62474	29.8500; 38.4800; 38.6400	9439; 12699; 12770; 13056	sp|P01877|IGHA2_HUMAN Immunoglobulin heavy constant alpha 2 OS=Homo sapiens OX=9606 GN=IGHA2 PE=1 SV=4	P01877	N	92	92	K.HYTnSSQDVTVPCRVPPPPPCCHPRLSLHR.P	HexNAc(6)Hex(4)NeuAc(1)Phospho(1)	Uncertain			SA	b	5801.4325; 5801.4603; 5801.4596; 5801.4540	NGlycan/2237.7493	2	b_hIgA-SA-GLTrFASP-FZpipHILIC_E2_step.raw_20240829_noglyc_spec_cut; c_hIgA-SA-GLTrFASP-FZpipHILIC_E2_step.raw_20240829_noglyc_spec_cut; d_hIgA-SA-GLTrFASP-FZpipHILIC_E2_step.raw_20240829_noglyc_spec_cut	102.84	9.97e-01 - 1.00e+00		3	38.49 - 38.62	4	4	89	118	1.00e+00 - 1.00e+00	8.1 - 30.0	8.1 - 24.7	1451.3654; 1451.3723; 1451.3722; 1451.3708	1451.37	-4.36; 0.43; 0.32; -0.66	-1 - 1	5801.46	4; 7; 10	7.223e+05 - 1.570e+06	38.49 - 38.62	4; 7; 10-9439	HexNAc(6)Hex(4)NeuAc(1)Phospho(1)
110.1	62474	38.6400	13056	sp|P01877|IGHA2_HUMAN Immunoglobulin heavy constant alpha 2 OS=Homo sapiens OX=9606 GN=IGHA2 PE=1 SV=4	P01877	N	92	92	K.HYTnSSQDVTVPCRVPPPPPCCHPRLSLHR.P	HexNAc(6)Hex(4)NeuAc(1)Phospho(1)	Uncertain			SA	d	5801.4540	NGlycan/2237.7493	1	d_hIgA-SA-GLTrFASP-FZpipHILIC_E2_step.raw_20240829_noglyc_spec_cut	102.84	1	4400000	3	38.62	4	4	89	118	1	8.1	8.1	1451.3708	1451.37	-0.66	0	5801.46	10	1.57e+06	38.62	10-13056	HexNAc(6)Hex(4)NeuAc(1)Phospho(1)
111	2516; 2563; 2566; 22365; 22379; 42323; 43992	24.1800; 25.5300; 25.5500; 25.3500; 25.5700; 25.4300; 45.0300	6730; 7240; 7245; 7730; 7811; 7869; 15118	sp|P01877|IGHA2_HUMAN Immunoglobulin heavy constant alpha 2 OS=Homo sapiens OX=9606 GN=IGHA2 PE=1 SV=4	P01877	N	92	92	K.HYTnSSQDVTVPCRVPPPPPCCHPRLSLHR.P	HexNAc(4)Hex(7)NeuAc(1)	Uncertain			SA	a	5801.5032; 5801.5015; 5801.5015; 5801.5132; 5801.5138; 5801.5087; 5801.4950	NGlycan/2237.7827	2	a_hIgA-SA-GLTrFASP-FZpipHILIC_E2_step.raw_20240829_noglyc_spec_cut; b_hIgA-SA-GLTrFASP-FZpipHILIC_E2_step.raw_20240829_noglyc_spec_cut; c_hIgA-SA-GLTrFASP-FZpipHILIC_E2_step.raw_20240829_noglyc_spec_cut	106.7	9.89e-01 - 1.00e+00		3	24.48 - 25.51	4	4	89	118	9.99e-01 - 1.00e+00	18.2 - 106.7	18.2 - 106.7	1451.3831; 1451.3827; 1451.3827; 1451.3856; 1451.3857; 1451.3845; 1451.3810	1451.38	2.07; 1.78; 1.78; 3.80; 3.91; 3.02; 0.65	-1 - 0	5801.49	1; 4; 7	1.040e+06 - 1.943e+07	24.48 - 25.51	1; 4; 7-6730	HexNAc(4)Hex(7)NeuAc(1)
111.1	22365; 22379	25.3500; 25.5700	7730; 7811	sp|P01877|IGHA2_HUMAN Immunoglobulin heavy constant alpha 2 OS=Homo sapiens OX=9606 GN=IGHA2 PE=1 SV=4	P01877	N	92	92	K.HYTnSSQDVTVPCRVPPPPPCCHPRLSLHR.P	HexNAc(4)Hex(7)NeuAc(1)	Uncertain			SA	b	5801.5132; 5801.5138	NGlycan/2237.7827	1	b_hIgA-SA-GLTrFASP-FZpipHILIC_E2_step.raw_20240829_noglyc_spec_cut	106.7	9.98e-01 - 1.00e+00	38700000	3	25.32	4	4	89	118	1.00e+00 - 1.00e+00	30.0 - 106.7	30.0 - 106.7	1451.3856; 1451.3857	1451.38	3.80; 3.91	0	5801.49	4	2.35e+06	25.32	4-7730	HexNAc(4)Hex(7)NeuAc(1)
111.1.1	22379	25.5700	7811	sp|P01877|IGHA2_HUMAN Immunoglobulin heavy constant alpha 2 OS=Homo sapiens OX=9606 GN=IGHA2 PE=1 SV=4	P01877	N	92	92	K.HYTnSSQDVTVPCRVPPPPPCCHPRLSLHR.P	HexNAc(4)Hex(7)NeuAc(1)	Uncertain			SA	b	5801.5138	NGlycan/2237.7827	0	b_hIgA-SA-GLTrFASP-FZpipHILIC_E2_step.raw_20240829_noglyc_spec_cut	106.7	1	38700000	3	25.32	4	4	89	118	1	106.7	106.7	1451.3857	1451.38	3.91	0	5801.49	4	2.35e+06	25.32	4-7811	HexNAc(4)Hex(7)NeuAc(1)
112	2798; 2812; 2819; 22612; 22623; 22628; 22682; 42564; 42567; 42585; 61567; 61576; 61578	28.3900; 28.5100; 28.5900; 28.1900; 28.3300; 28.4300; 29.2300; 28.2900; 28.4800; 28.2600; 28.3400; 28.3500	8338; 8383; 8413; 8807; 8859; 8898; 9202; 8943; 8959; 9018; 9038; 9069; 9075	sp|P01877|IGHA2_HUMAN Immunoglobulin heavy constant alpha 2 OS=Homo sapiens OX=9606 GN=IGHA2 PE=1 SV=4	P01877	N,Q	92,95	92	K.HYTnSSqDVTVPCRVPPPPPCCHPRLSLHR.P	HexNAc(6)Hex(4)NeuAc(1)	Uncertain			SA	a	5722.4579; 5722.4657; 5722.4632; 5722.4621; 5722.4679; 5722.4642; 5722.4524; 5722.4710; 5722.4686; 5722.4623; 5722.4717; 5722.4668; 5722.4586	NGlycan/2157.7829; Deamidated/0.9840	2	a_hIgA-SA-GLTrFASP-FZpipHILIC_E2_step.raw_20240829_noglyc_spec_cut; b_hIgA-SA-GLTrFASP-FZpipHILIC_E2_step.raw_20240829_noglyc_spec_cut; c_hIgA-SA-GLTrFASP-FZpipHILIC_E2_step.raw_20240829_noglyc_spec_cut; d_hIgA-SA-GLTrFASP-FZpipHILIC_E2_step.raw_20240829_noglyc_spec_cut	150.29	8.43e-01 - 1.00e+00		0	28.31 - 29.02	4	4,7	89	118	9.84e-01 - 1.00e+00	84.3 - 150.3	10.0 - 131.6	1431.6218; 1431.6237; 1431.6231; 1431.6228; 1431.6243; 1431.6233; 1431.6204; 1431.6250; 1431.6244; 1431.6229; 1431.6252; 1431.6240; 1431.6219	1431.63	-3.07; -1.71; -2.14; -2.35; -1.32; -1.97; -4.02; -0.78; -1.20; -2.30; -0.65; -1.51; -2.95	-1 - 1	5722.48	1; 4; 7; 10	5.121e+05 - 9.982e+05	28.31 - 29.02	1; 4; 7; 10-8338	HexNAc(6)Hex(4)NeuAc(1)
112.1	2798; 2812; 2819	28.3900; 28.5100; 28.5900	8338; 8383; 8413	sp|P01877|IGHA2_HUMAN Immunoglobulin heavy constant alpha 2 OS=Homo sapiens OX=9606 GN=IGHA2 PE=1 SV=4	P01877	N,Q	92,95	92	K.HYTnSSqDVTVPCRVPPPPPCCHPRLSLHR.P	HexNAc(6)Hex(4)NeuAc(1)	Uncertain			SA	a	5722.4579; 5722.4657; 5722.4632	NGlycan/2157.7829; Deamidated/0.9840	1	a_hIgA-SA-GLTrFASP-FZpipHILIC_E2_step.raw_20240829_noglyc_spec_cut	131.63	1.00e+00 - 1.00e+00	6400000	0	28.53	4	4,7	89	118	1.00e+00 - 1.00e+00	97.0 - 131.6	97.0 - 131.6	1431.6218; 1431.6237; 1431.6231	1431.63	-3.07; -1.71; -2.14	1	5722.48	1	5.16e+05	28.53	1-8338	HexNAc(6)Hex(4)NeuAc(1)
112.1.1	2812	28.5100	8383	sp|P01877|IGHA2_HUMAN Immunoglobulin heavy constant alpha 2 OS=Homo sapiens OX=9606 GN=IGHA2 PE=1 SV=4	P01877	N,Q	92,95	92	K.HYTnSSqDVTVPCRVPPPPPCCHPRLSLHR.P	HexNAc(6)Hex(4)NeuAc(1)	Uncertain			SA	a	5722.4657	NGlycan/2157.7829; Deamidated/0.9840	0	a_hIgA-SA-GLTrFASP-FZpipHILIC_E2_step.raw_20240829_noglyc_spec_cut	131.63	1	6400000	0	28.53	4	4,7	89	118	1	131.6	131.6	1431.6237	1431.63	-1.71	1	5722.48	1	5.16e+05	28.53	1-8383	HexNAc(6)Hex(4)NeuAc(1)
112.1.2	2819	28.5900	8413	sp|P01877|IGHA2_HUMAN Immunoglobulin heavy constant alpha 2 OS=Homo sapiens OX=9606 GN=IGHA2 PE=1 SV=4	P01877	N,Q	92,95	92	K.HYTnSSqDVTVPCRVPPPPPCCHPRLSLHR.P	HexNAc(6)Hex(4)NeuAc(1)	Uncertain			SA	a	5722.4632	NGlycan/2157.7829; Deamidated/0.9840	0	a_hIgA-SA-GLTrFASP-FZpipHILIC_E2_step.raw_20240829_noglyc_spec_cut	101.57	1	6400000	0	28.53	4	4,7	89	118	1	101.6	101.6	1431.6231	1431.63	-2.14	1	5722.48	1	5.16e+05	28.53	1-8413	HexNAc(6)Hex(4)NeuAc(1)
112.2	22612; 22623; 22628; 22682	28.1900; 28.3300; 28.4300; 29.2300	8807; 8859; 8898; 9202	sp|P01877|IGHA2_HUMAN Immunoglobulin heavy constant alpha 2 OS=Homo sapiens OX=9606 GN=IGHA2 PE=1 SV=4	P01877	N,Q	92,95	92	K.HYTnSSqDVTVPCRVPPPPPCCHPRLSLHR.P	HexNAc(6)Hex(4)NeuAc(1)	Uncertain			SA	b	5722.4621; 5722.4679; 5722.4642; 5722.4524	NGlycan/2157.7829; Deamidated/0.9840	1	b_hIgA-SA-GLTrFASP-FZpipHILIC_E2_step.raw_20240829_noglyc_spec_cut	127.67	9.99e-01 - 1.00e+00	17600000	0	29.02	4	4,7	89	118	1.00e+00 - 1.00e+00	98.5 - 127.7	10.0 - 127.7	1431.6228; 1431.6243; 1431.6233; 1431.6204	1431.63	-2.35; -1.32; -1.97; -4.02	0 - 1	5722.48	4	6.86e+05	29.02	4-8807	HexNAc(6)Hex(4)NeuAc(1)
112.2.2	22623	28.3300	8859	sp|P01877|IGHA2_HUMAN Immunoglobulin heavy constant alpha 2 OS=Homo sapiens OX=9606 GN=IGHA2 PE=1 SV=4	P01877	N,Q	92,95	92	K.HYTnSSqDVTVPCRVPPPPPCCHPRLSLHR.P	HexNAc(6)Hex(4)NeuAc(1)	Uncertain			SA	b	5722.4679	NGlycan/2157.7829; Deamidated/0.9840	0	b_hIgA-SA-GLTrFASP-FZpipHILIC_E2_step.raw_20240829_noglyc_spec_cut	110.12	1	17600000	0	29.02	4	4,7	89	118	1	110.1	10.0	1431.6243	1431.63	-1.32	0	5722.48	4	6.86e+05	29.02	4-8859	HexNAc(6)Hex(4)NeuAc(1)
112.2.3	22628	28.4300	8898	sp|P01877|IGHA2_HUMAN Immunoglobulin heavy constant alpha 2 OS=Homo sapiens OX=9606 GN=IGHA2 PE=1 SV=4	P01877	N,Q	92,95	92	K.HYTnSSqDVTVPCRVPPPPPCCHPRLSLHR.P	HexNAc(6)Hex(4)NeuAc(1)	Uncertain			SA	b	5722.4642	NGlycan/2157.7829; Deamidated/0.9840	0	b_hIgA-SA-GLTrFASP-FZpipHILIC_E2_step.raw_20240829_noglyc_spec_cut	118.48	1	17600000	0	29.02	4	4,7	89	118	1	98.5	98.5	1431.6233	1431.63	-1.97	1	5722.48	4	6.86e+05	29.02	4-8898	HexNAc(6)Hex(4)NeuAc(1)
112.2.4	22682	29.2300	9202	sp|P01877|IGHA2_HUMAN Immunoglobulin heavy constant alpha 2 OS=Homo sapiens OX=9606 GN=IGHA2 PE=1 SV=4	P01877	N,Q	92,95	92	K.HYTnSSqDVTVPCRVPPPPPCCHPRLSLHR.P	HexNAc(6)Hex(4)NeuAc(1)	Uncertain			SA	b	5722.4524	NGlycan/2157.7829; Deamidated/0.9840	0	b_hIgA-SA-GLTrFASP-FZpipHILIC_E2_step.raw_20240829_noglyc_spec_cut	112.27	1	17600000	0	29.02	4	4,7	89	118	1	112.3	112.3	1431.6204	1431.63	-4.02	0	5722.48	4	6.86e+05	29.02	4-9202	HexNAc(6)Hex(4)NeuAc(1)
112.3	42564; 42567; 42585	28.2900; 28.3300; 28.4800	8943; 8959; 9018	sp|P01877|IGHA2_HUMAN Immunoglobulin heavy constant alpha 2 OS=Homo sapiens OX=9606 GN=IGHA2 PE=1 SV=4	P01877	N,Q	92,95	92	K.HYTnSSqDVTVPCRVPPPPPCCHPRLSLHR.P	HexNAc(6)Hex(4)NeuAc(1)	Uncertain			SA	c	5722.4710; 5722.4686; 5722.4623	NGlycan/2157.7829; Deamidated/0.9840	1	c_hIgA-SA-GLTrFASP-FZpipHILIC_E2_step.raw_20240829_noglyc_spec_cut	143.96	9.92e-01 - 1.00e+00	6430000	0	28.42	4	4,7	89	118	1.00e+00 - 1.00e+00	108.7 - 144.0	23.4 - 112.7	1431.6250; 1431.6244; 1431.6229	1431.63	-0.78; -1.20; -2.30	-1 - 0	5722.48	7	5.12e+05	28.42	7-8943	HexNAc(6)Hex(4)NeuAc(1)
112.3.2	42567	28.3300	8959	sp|P01877|IGHA2_HUMAN Immunoglobulin heavy constant alpha 2 OS=Homo sapiens OX=9606 GN=IGHA2 PE=1 SV=4	P01877	N,Q	92,95	92	K.HYTnSSqDVTVPCRVPPPPPCCHPRLSLHR.P	HexNAc(6)Hex(4)NeuAc(1)	Uncertain			SA	c	5722.4686	NGlycan/2157.7829; Deamidated/0.9840	0	c_hIgA-SA-GLTrFASP-FZpipHILIC_E2_step.raw_20240829_noglyc_spec_cut	143.96	0.99	6430000	0	28.42	4	4,7	89	118	1	144.0	23.4	1431.6244	1431.63	-1.20	0	5722.48	7	5.12e+05	28.42	7-8959	HexNAc(6)Hex(4)NeuAc(1)
112.3.3	42585	28.4800	9018	sp|P01877|IGHA2_HUMAN Immunoglobulin heavy constant alpha 2 OS=Homo sapiens OX=9606 GN=IGHA2 PE=1 SV=4	P01877	N,Q	92,95	92	K.HYTnSSqDVTVPCRVPPPPPCCHPRLSLHR.P	HexNAc(6)Hex(4)NeuAc(1)	Uncertain			SA	c	5722.4623	NGlycan/2157.7829; Deamidated/0.9840	0	c_hIgA-SA-GLTrFASP-FZpipHILIC_E2_step.raw_20240829_noglyc_spec_cut	112.67	1	6430000	0	28.42	4	4,7	89	118	1	112.7	112.7	1431.6229	1431.63	-2.30	-1	5722.48	7	5.12e+05	28.42	7-9018	HexNAc(6)Hex(4)NeuAc(1)
112.4	61567; 61576; 61578	28.2600; 28.3400; 28.3500	9038; 9069; 9075	sp|P01877|IGHA2_HUMAN Immunoglobulin heavy constant alpha 2 OS=Homo sapiens OX=9606 GN=IGHA2 PE=1 SV=4	P01877	N,Q	92,95	92	K.HYTnSSqDVTVPCRVPPPPPCCHPRLSLHR.P	HexNAc(6)Hex(4)NeuAc(1)	Uncertain			SA	d	5722.4717; 5722.4668; 5722.4586	NGlycan/2157.7829; Deamidated/0.9840	1	d_hIgA-SA-GLTrFASP-FZpipHILIC_E2_step.raw_20240829_noglyc_spec_cut	150.29	8.43e-01 - 9.98e-01	15300000	0	28.31	4	4,7	89	118	9.84e-01 - 1.00e+00	84.3 - 150.3	19.8 - 109.2	1431.6252; 1431.6240; 1431.6219	1431.63	-0.65; -1.51; -2.95	0 - 1	5722.48	10	9.98e+05	28.31	10-9038	HexNAc(6)Hex(4)NeuAc(1)
112.4.2	61576	28.3400	9069	sp|P01877|IGHA2_HUMAN Immunoglobulin heavy constant alpha 2 OS=Homo sapiens OX=9606 GN=IGHA2 PE=1 SV=4	P01877	N,Q	92,95	92	K.HYTnSSqDVTVPCRVPPPPPCCHPRLSLHR.P	HexNAc(6)Hex(4)NeuAc(1)	Uncertain			SA	d	5722.4668	NGlycan/2157.7829; Deamidated/0.9840	0	d_hIgA-SA-GLTrFASP-FZpipHILIC_E2_step.raw_20240829_noglyc_spec_cut	150.29	0.84	15300000	0	28.31	4	4,7	89	118	0.98	150.3	19.8	1431.6240	1431.63	-1.51	0	5722.48	10	9.98e+05	28.31	10-9069	HexNAc(6)Hex(4)NeuAc(1)
113	117873	28.2000	9164	sp|P0DOX2|IGA2_HUMAN Immunoglobulin alpha-2 heavy chain OS=Homo sapiens OX=9606 PE=1 SV=2	P0DOX2	N	207	207	K.HYTnSSQDVTVPCRVPPPPPCCHPRLSLHR.P	HexNAc(5)Hex(6)NeuAc(1)	Uncertain			AR	c	5842.5105	NGlycan/2278.8092	1	c_hIgA-AR-GLTrFASP-FZpipHILIC_16mAbs_E2_step.raw_20240829_noglyc_spec_cut	118.87	1	2620000	3	28.21	4	4	204	233	1	118.9	118.9	1461.6349	1461.64	-1.24	-1	5842.52	20	6.53e+05	28.21	20-9164	HexNAc(5)Hex(6)NeuAc(1)
114	84588; 84590; 100845; 117860; 117871; 118529; 133346; 133633; 133649; 135315	28.2400; 28.2800; 28.1500; 28.0700; 28.1900; 35.2300; 25.1200; 28.0100; 28.1100; 43.4100	8134; 8148; 8983; 9114; 9159; 11768; 7288; 8415; 8455; 14124	sp|P0DOX2|IGA2_HUMAN Immunoglobulin alpha-2 heavy chain OS=Homo sapiens OX=9606 PE=1 SV=2	P0DOX2	N,Q	207,210	207	K.HYTnSSqDVTVPCRVPPPPPCCHPRLSLHR.P	HexNAc(6)Hex(4)NeuAc(1)	Uncertain			AR	a	5722.4756; 5722.4664; 5722.4665; 5722.4608; 5722.4623; 5722.4508; 5722.4458; 5722.4654; 5722.4672; 5722.4596	NGlycan/2157.7829; Deamidated/0.9840	2	a_hIgA-AR-GLTrFASP-FZpipHILIC_8mAbs_E2_step.raw_20240829_noglyc_spec_cut; b_hIgA-AR-GLTrFASP-FZpipHILIC_11mAbs_E2_step.raw_20240829_noglyc_spec_cut; c_hIgA-AR-GLTrFASP-FZpipHILIC_16mAbs_E2_step.raw_20240829_noglyc_spec_cut; d_hIgA-AR-GLTrFASP-FZpipHILIC_16mAbs_E2_step.raw_20240829_noglyc_spec_cut	134.58	1.00e+00 - 1.00e+00		0	25.23 - 28.21	4	4,7	204	233	1.00e+00 - 1.00e+00	9.2 - 120.9	7.5 - 120.9	1431.6262; 1431.6239; 1431.6239; 1431.6225; 1431.6229; 1431.6200; 1431.6187; 1431.6236; 1431.6241; 1431.6222	1431.63	0.03; -1.59; -1.56; -2.57; -2.30; -4.32; -5.19; -1.76; -1.45; -2.77	0 - 1	5722.48	14; 17; 20; 23	1.003e+06 - 2.588e+06	25.23 - 28.21	14; 17; 20; 23-8134	HexNAc(6)Hex(4)NeuAc(1)
114.1	84588; 84590	28.2400; 28.2800	8134; 8148	sp|P0DOX2|IGA2_HUMAN Immunoglobulin alpha-2 heavy chain OS=Homo sapiens OX=9606 PE=1 SV=2	P0DOX2	N,Q	207,210	207	K.HYTnSSqDVTVPCRVPPPPPCCHPRLSLHR.P	HexNAc(6)Hex(4)NeuAc(1)	Uncertain			AR	a	5722.4756; 5722.4664	NGlycan/2157.7829; Deamidated/0.9840	1	a_hIgA-AR-GLTrFASP-FZpipHILIC_8mAbs_E2_step.raw_20240829_noglyc_spec_cut	127.17	1.00e+00 - 1.00e+00	2810000	0	28.18	4	4,7	204	233	1.00e+00 - 1.00e+00	114.2 - 119.6	7.5 - 114.2	1431.6262; 1431.6239	1431.63	0.03; -1.59	0 - 1	5722.48	14	1.43e+06	28.18	14-8134	HexNAc(6)Hex(4)NeuAc(1)
114.1.2	84590	28.2800	8148	sp|P0DOX2|IGA2_HUMAN Immunoglobulin alpha-2 heavy chain OS=Homo sapiens OX=9606 PE=1 SV=2	P0DOX2	N,Q	207,210	207	K.HYTnSSqDVTVPCRVPPPPPCCHPRLSLHR.P	HexNAc(6)Hex(4)NeuAc(1)	Uncertain			AR	a	5722.4664	NGlycan/2157.7829; Deamidated/0.9840	0	a_hIgA-AR-GLTrFASP-FZpipHILIC_8mAbs_E2_step.raw_20240829_noglyc_spec_cut	127.17	1	2810000	0	28.18	4	4,7	204	233	1	114.2	114.2	1431.6239	1431.63	-1.59	1	5722.48	14	1.43e+06	28.18	14-8148	HexNAc(6)Hex(4)NeuAc(1)
114.2	100845	28.1500	8983	sp|P0DOX2|IGA2_HUMAN Immunoglobulin alpha-2 heavy chain OS=Homo sapiens OX=9606 PE=1 SV=2	P0DOX2	N,Q	207,210	207	K.HYTnSSqDVTVPCRVPPPPPCCHPRLSLHR.P	HexNAc(6)Hex(4)NeuAc(1)	Uncertain			AR	b	5722.4665	NGlycan/2157.7829; Deamidated/0.9840	1	b_hIgA-AR-GLTrFASP-FZpipHILIC_11mAbs_E2_step.raw_20240829_noglyc_spec_cut	103.06	1	3690000	0	28.21	4	4,7	204	233	1	97.8	8.6	1431.6239	1431.63	-1.56	0	5722.48	17	1.16e+06	28.21	17-8983	HexNAc(6)Hex(4)NeuAc(1)
114.3	117860; 117871; 118529	28.0700; 28.1900; 35.2300	9114; 9159; 11768	sp|P0DOX2|IGA2_HUMAN Immunoglobulin alpha-2 heavy chain OS=Homo sapiens OX=9606 PE=1 SV=2	P0DOX2	N,Q	207,210	207	K.HYTnSSqDVTVPCRVPPPPPCCHPRLSLHR.P	HexNAc(6)Hex(4)NeuAc(1)	Uncertain			AR	c	5722.4608; 5722.4623; 5722.4508	NGlycan/2157.7829; Deamidated/0.9840	1	c_hIgA-AR-GLTrFASP-FZpipHILIC_16mAbs_E2_step.raw_20240829_noglyc_spec_cut	121.02	1.00e+00 - 1.00e+00	4940000	0	28.16	4	4,7	204	233	1.00e+00 - 1.00e+00	9.2 - 107.4	9.2 - 107.4	1431.6225; 1431.6229; 1431.6200	1431.63	-2.57; -2.30; -4.32	0 - 1	5722.48	20	1e+06	28.16	20-9114	HexNAc(6)Hex(4)NeuAc(1)
114.3.2	117871	28.1900	9159	sp|P0DOX2|IGA2_HUMAN Immunoglobulin alpha-2 heavy chain OS=Homo sapiens OX=9606 PE=1 SV=2	P0DOX2	N,Q	207,210	207	K.HYTnSSqDVTVPCRVPPPPPCCHPRLSLHR.P	HexNAc(6)Hex(4)NeuAc(1)	Uncertain			AR	c	5722.4623	NGlycan/2157.7829; Deamidated/0.9840	0	c_hIgA-AR-GLTrFASP-FZpipHILIC_16mAbs_E2_step.raw_20240829_noglyc_spec_cut	113.45	1	4940000	0	28.16	4	4,7	204	233	1	107.4	107.4	1431.6229	1431.63	-2.30	1	5722.48	20	1e+06	28.16	20-9159	HexNAc(6)Hex(4)NeuAc(1)
114.4	133346; 133633; 133649; 135315	25.1200; 28.0100; 28.1100; 43.4100	7288; 8415; 8455; 14124	sp|P0DOX2|IGA2_HUMAN Immunoglobulin alpha-2 heavy chain OS=Homo sapiens OX=9606 PE=1 SV=2	P0DOX2	N,Q	207,210	207	K.HYTnSSqDVTVPCRVPPPPPCCHPRLSLHR.P	HexNAc(6)Hex(4)NeuAc(1)	Uncertain			AR	d	5722.4458; 5722.4654; 5722.4672; 5722.4596	NGlycan/2157.7829; Deamidated/0.9840	1	d_hIgA-AR-GLTrFASP-FZpipHILIC_16mAbs_E2_step.raw_20240829_noglyc_spec_cut	134.58	1.00e+00 - 1.00e+00	44800000	0	25.23	4	4,7	204	233	1.00e+00 - 1.00e+00	30.0 - 120.9	30.0 - 120.9	1431.6187; 1431.6236; 1431.6241; 1431.6222	1431.63	-5.19; -1.76; -1.45; -2.77	1	5722.48	23	2.59e+06	25.23	23-7288	HexNAc(6)Hex(4)NeuAc(1)
114.4.2	133633	28.0100	8415	sp|P0DOX2|IGA2_HUMAN Immunoglobulin alpha-2 heavy chain OS=Homo sapiens OX=9606 PE=1 SV=2	P0DOX2	N,Q	207,210	207	K.HYTnSSqDVTVPCRVPPPPPCCHPRLSLHR.P	HexNAc(6)Hex(4)NeuAc(1)	Uncertain			AR	d	5722.4654	NGlycan/2157.7829; Deamidated/0.9840	0	d_hIgA-AR-GLTrFASP-FZpipHILIC_16mAbs_E2_step.raw_20240829_noglyc_spec_cut	124.1	1	44800000	0	25.23	4	4,7	204	233	1	103.0	103.0	1431.6236	1431.63	-1.76	1	5722.48	23	2.59e+06	25.23	23-8415	HexNAc(6)Hex(4)NeuAc(1)
114.4.3	133649	28.1100	8455	sp|P0DOX2|IGA2_HUMAN Immunoglobulin alpha-2 heavy chain OS=Homo sapiens OX=9606 PE=1 SV=2	P0DOX2	N,Q	207,210	207	K.HYTnSSqDVTVPCRVPPPPPCCHPRLSLHR.P	HexNAc(6)Hex(4)NeuAc(1)	Uncertain			AR	d	5722.4672	NGlycan/2157.7829; Deamidated/0.9840	0	d_hIgA-AR-GLTrFASP-FZpipHILIC_16mAbs_E2_step.raw_20240829_noglyc_spec_cut	134.58	1	44800000	0	25.23	4	4,7	204	233	1	120.9	120.9	1431.6241	1431.63	-1.45	1	5722.48	23	2.59e+06	25.23	23-8455	HexNAc(6)Hex(4)NeuAc(1)
115	105048; 126313	25.3900; 24.9100	7905; 7144	sp|P0DOX2|IGA2_HUMAN Immunoglobulin alpha-2 heavy chain OS=Homo sapiens OX=9606 PE=1 SV=2	P0DOX2	N,Q	207,210	207	K.HYTnSSqDVTVPCRVPPPPPCCHPRLSLHR.P	HexNAc(5)Hex(5)Fuc(1)NeuAc(1)Ac(1)	Uncertain			AR	b	5869.4991; 5869.4962	NGlycan/2304.8249; Deamidated/0.9840	2	b_hIgA-AR-GLTrFASP-FZpipHILIC_11mAbs_E2_step.raw_20240829_noglyc_spec_cut; c_hIgA-AR-GLTrFASP-FZpipHILIC_55mAbs_E1_step.raw_20240829_noglyc_spec_cut	143.65	2.67e-01 - 1.00e+00		0	24.77 - 25.54	4	4,7	204	233	9.09e-01 - 1.00e+00	99.5 - 121.9	17.0 - 19.8	1468.3821; 1468.3813	1468.39	-3.11; -3.61	0	5869.52	17; 21	1.926e+06 - 1.431e+07	24.77 - 25.54	17; 21-7905	HexNAc(5)Hex(5)Fuc(1)NeuAc(1)Ac(1)
115.1	126313	24.9100	7144	sp|P0DOX2|IGA2_HUMAN Immunoglobulin alpha-2 heavy chain OS=Homo sapiens OX=9606 PE=1 SV=2	P0DOX2	N,Q	207,210	207	K.HYTnSSqDVTVPCRVPPPPPCCHPRLSLHR.P	HexNAc(5)Hex(5)Fuc(1)NeuAc(1)Ac(1)	Uncertain			AR	c	5869.4962	NGlycan/2304.8249; Deamidated/0.9840	1	c_hIgA-AR-GLTrFASP-FZpipHILIC_55mAbs_E1_step.raw_20240829_noglyc_spec_cut	143.65	0.27	27500000	0	24.77	4	4,7	204	233	0.91	121.9	17.0	1468.3813	1468.39	-3.61	0	5869.52	21	1.93e+06	24.77	21-7144	HexNAc(5)Hex(5)Fuc(1)NeuAc(1)Ac(1)
116	63167	46.6200	16047	sp|P01877|IGHA2_HUMAN Immunoglobulin heavy constant alpha 2 OS=Homo sapiens OX=9606 GN=IGHA2 PE=1 SV=4	P01877	N	131	131	K.HYTNSSQDVTVPCRVPPPPPCCHPRLSLHRPALEDLLLGSEAnLTCTLTGLR.D	HexNAc(5)Hex(6)Fuc(1)NeuAc(2)	Uncertain			SA	d	8617.9183	NGlycan/2715.9625	1	d_hIgA-SA-GLTrFASP-FZpipHILIC_E2_step.raw_20240829_noglyc_spec_cut	333.94	0.013	917000000	4	46.63	6	43	89	140	0.14	333.9	67.7	1437.3270	1437.32	3.13	-2	8617.89	10	1.62e+08	46.63	10-16047	HexNAc(5)Hex(6)Fuc(1)NeuAc(2)
117	3852; 102083; 130642; 134852	40.0400; 39.2100; 39.4600; 39.1500	12785; 13142; 12531; 12656	sp|A0A0J9YXX1|HV5X1_HUMAN Immunoglobulin heavy variable 5-10-1 OS=Homo sapiens OX=9606 GN=IGHV5-10-1 PE=3 SV=1	A0A0J9YXX1	N	78	78	R.IDPSDSYTnYSPSFQGHVTISADK.S	HexNAc(3)Hex(3)Fuc(3)NeuAc(1)	Uncertain			SA	a	4452.8549; 4452.8477; 4452.8464; 4452.8471	NGlycan/1824.6657	2	a_hIgA-SA-GLTrFASP-FZpipHILIC_E2_step.raw_20240829_noglyc_spec_cut; b_hIgA-AR-GLTrFASP-FZpipHILIC_11mAbs_E2_step.raw_20240829_noglyc_spec_cut; c_hIgA-AR-GLTrFASP-FZpipHILIC_209mAbs-Dil1-5_D_step.raw_20240829_noglyc_spec_cut; d_hIgA-AR-GLTrFASP-FZpipHILIC_16mAbs_E2_step.raw_20240829_noglyc_spec_cut	128.84	7.38e-01 - 1.00e+00		2	39.23 - 40.11	3	9	70	93	7.38e-01 - 1.00e+00	29.0 - 43.8	4.3 - 30.0	1485.2922; 1485.2898; 1485.2894; 1485.2897	1485.3	-1.99; -3.59; -3.88; -3.73	-1 - 0	4452.86	1; 17; 22; 23	8.377e+05 - 3.428e+06	39.23 - 40.11	1; 17; 22; 23-12785	HexNAc(3)Hex(3)Fuc(3)NeuAc(1)
117.1	3852	40.0400	12785	sp|A0A0J9YXX1|HV5X1_HUMAN Immunoglobulin heavy variable 5-10-1 OS=Homo sapiens OX=9606 GN=IGHV5-10-1 PE=3 SV=1	A0A0J9YXX1	N	78	78	R.IDPSDSYTnYSPSFQGHVTISADK.S	HexNAc(3)Hex(3)Fuc(3)NeuAc(1)	Uncertain			SA	a	4452.8549	NGlycan/1824.6657	1	a_hIgA-SA-GLTrFASP-FZpipHILIC_E2_step.raw_20240829_noglyc_spec_cut	128.84	1	13400000	2	40.11	3	9	70	93	1	29.0	29.0	1485.2922	1485.3	-1.99	-1	4452.86	1	1.43e+06	40.11	1-12785	HexNAc(3)Hex(3)Fuc(3)NeuAc(1)
118	3254; 3258; 3489	33.1500; 33.1900; 35.4600	10169; 10185; 11051	sp|A0A0J9YXX1|HV5X1_HUMAN Immunoglobulin heavy variable 5-10-1 OS=Homo sapiens OX=9606 GN=IGHV5-10-1 PE=3 SV=1	A0A0J9YXX1	N	78	78	R.IDPSDSYTnYSPSFQGHVTISADK.S	HexNAc(5)Hex(5)Fuc(2)NeuAc(1)	Uncertain			SA	a	5037.0732; 5037.0800; 5037.0965	NGlycan/2408.8722	2	a_hIgA-SA-GLTrFASP-FZpipHILIC_E2_step.raw_20240829_noglyc_spec_cut	185.41	2.65e-01 - 9.98e-01	48700000	3	33.11	4	9	70	93	2.65e-01 - 9.98e-01	31.4 - 58.4	1.2 - 58.4	1260.2756; 1260.2773; 1260.2814	1260.27	0.59; 1.94; 5.21	-1	5037.07	1	2.33e+06	33.11	1-10169	HexNAc(5)Hex(5)Fuc(2)NeuAc(1)
118.1.2	3258	33.1900	10185	sp|A0A0J9YXX1|HV5X1_HUMAN Immunoglobulin heavy variable 5-10-1 OS=Homo sapiens OX=9606 GN=IGHV5-10-1 PE=3 SV=1	A0A0J9YXX1	N	78	78	R.IDPSDSYTnYSPSFQGHVTISADK.S	HexNAc(5)Hex(5)Fuc(2)NeuAc(1)	Uncertain			SA	a	5037.0800	NGlycan/2408.8722	0	a_hIgA-SA-GLTrFASP-FZpipHILIC_E2_step.raw_20240829_noglyc_spec_cut	157.17	0.27	48700000	3	33.11	4	9	70	93	0.27	58.4	58.4	1260.2773	1260.27	1.94	-1	5037.07	1	2.33e+06	33.11	1-10185	HexNAc(5)Hex(5)Fuc(2)NeuAc(1)
118.1.3	3489	35.4600	11051	sp|A0A0J9YXX1|HV5X1_HUMAN Immunoglobulin heavy variable 5-10-1 OS=Homo sapiens OX=9606 GN=IGHV5-10-1 PE=3 SV=1	A0A0J9YXX1	N	78	78	R.IDPSDSYTnYSPSFQGHVTISADK.S	HexNAc(5)Hex(5)Fuc(2)NeuAc(1)	Uncertain			SA	a	5037.0965	NGlycan/2408.8722	0	a_hIgA-SA-GLTrFASP-FZpipHILIC_E2_step.raw_20240829_noglyc_spec_cut	120.74	1	48700000	3	33.11	4	9	70	93	1	31.4	31.4	1260.2814	1260.27	5.21	-1	5037.07	1	2.33e+06	33.11	1-11051	HexNAc(5)Hex(5)Fuc(2)NeuAc(1)
119	84916	31.3100	9325	sp|P01591|IGJ_HUMAN Immunoglobulin J chain OS=Homo sapiens OX=9606 GN=JCHAIN PE=1 SV=4	P01591	N	71	71	R.IIVPLNNREnISDPTSPLR.T	HexNAc(5)Hex(5)Fuc(1)NeuAc(1)	Uncertain			AR	a	4409.9901	NGlycan/2262.8143	1	a_hIgA-AR-GLTrFASP-FZpipHILIC_8mAbs_E2_step.raw_20240829_noglyc_spec_cut	305.34	0.001	7880000	2	31.28	3	10	62	80	0.0068	232.9	232.9	1471.0040	1471	1.34	-1	4409.98	14	1.38e+06	31.28	14-9325	HexNAc(5)Hex(5)Fuc(1)NeuAc(1)
120	43136; 124540	34.1400; 33.3900	11163; 10443	sp|P01591|IGJ_HUMAN Immunoglobulin J chain OS=Homo sapiens OX=9606 GN=JCHAIN PE=1 SV=4	P01591	N	71	71	R.IIVPLNNREnISDPTSPLR.T	HexNAc(4)Hex(5)Fuc(1)NeuAc(2)	True-positive	Replace N-glycan	HexNAc(4)Hex(5)Fuc(1)NeuAc(2)	SA	c	4499.0068; 4499.0121	NGlycan/2351.8508	2	c_hIgA-SA-GLTrFASP-FZpipHILIC_E2_step.raw_20240829_noglyc_spec_cut; c_hIgA-AR-GLTrFASP-FZpipHILIC_55mAbs_E1_step.raw_20240829_noglyc_spec_cut	303.98	7.93e-02 - 7.19e-01		2	33.36 - 34.13	4	10	62	80	6.67e-01 - 9.59e-01	73.7 - 176.6	6.1 - 20.1	1125.7590; 1125.7603	1125.76	-3.06; -1.89	-1	4499.02	7; 21	1.032e+06 - 9.706e+06	33.36 - 34.13	7; 21-11163	HexNAc(4)Hex(5)Fuc(3)NeuAc(1)
120.1	43136	34.1400	11163	sp|P01591|IGJ_HUMAN Immunoglobulin J chain OS=Homo sapiens OX=9606 GN=JCHAIN PE=1 SV=4	P01591	N	71	71	R.IIVPLNNREnISDPTSPLR.T	HexNAc(4)Hex(5)Fuc(1)NeuAc(2)	True-positive	Replace N-glycan	HexNAc(4)Hex(5)Fuc(1)NeuAc(2)	SA	c	4499.0068	NGlycan/2351.8508	1	c_hIgA-SA-GLTrFASP-FZpipHILIC_E2_step.raw_20240829_noglyc_spec_cut	303.98	0.079	6980000	2	34.13	4	10	62	80	0.67	176.6	20.1	1125.7590	1125.76	-3.06	-1	4499.02	7	1.03e+06	34.13	7-11163	HexNAc(4)Hex(5)Fuc(3)NeuAc(1)
120.2	124540	33.3900	10443	sp|P01591|IGJ_HUMAN Immunoglobulin J chain OS=Homo sapiens OX=9606 GN=JCHAIN PE=1 SV=4	P01591	N	71	71	R.IIVPLNNREnISDPTSPLR.T	HexNAc(4)Hex(5)Fuc(1)NeuAc(2)	True-positive	Replace N-glycan	HexNAc(4)Hex(5)Fuc(1)NeuAc(2)	AR	c	4499.0121	NGlycan/2351.8508	1	c_hIgA-AR-GLTrFASP-FZpipHILIC_55mAbs_E1_step.raw_20240829_noglyc_spec_cut	194.04	0.72	73000000	2	33.36	4	10	62	80	0.96	73.7	6.1	1125.7603	1125.76	-1.89	-1	4499.02	21	9.71e+06	33.36	21-10443	HexNAc(4)Hex(5)Fuc(3)NeuAc(1)
121	85206; 101476; 118378; 134222; 134226; 134250	33.7100; 33.7000; 33.5900; 33.5300; 33.5600; 33.7200	10247; 11117; 11185; 10552; 10561; 10623	sp|P01591|IGJ_HUMAN Immunoglobulin J chain OS=Homo sapiens OX=9606 GN=JCHAIN PE=1 SV=4	P01591	N	71	71	R.IIVPLNNREnISDPTSPLR.T	HexNAc(4)Hex(6)Fuc(2)NeuAc(1)	Uncertain			AR	a	4515.0303; 4515.0313; 4515.0332; 4515.0313; 4515.0357; 4515.0312	NGlycan/2367.8457	2	a_hIgA-AR-GLTrFASP-FZpipHILIC_8mAbs_E2_step.raw_20240829_noglyc_spec_cut; b_hIgA-AR-GLTrFASP-FZpipHILIC_11mAbs_E2_step.raw_20240829_noglyc_spec_cut; c_hIgA-AR-GLTrFASP-FZpipHILIC_16mAbs_E2_step.raw_20240829_noglyc_spec_cut; d_hIgA-AR-GLTrFASP-FZpipHILIC_16mAbs_E2_step.raw_20240829_noglyc_spec_cut	291.46	1.33e-03 - 1.00e+00		2	33.57 - 33.74	4	10	62	80	1.29e-02 - 1.00e+00	10.0 - 203.3	10.0 - 203.3	1129.7649; 1129.7651; 1129.7656; 1129.7651; 1129.7662; 1129.7651	1129.76	3.27; 3.50; 3.91; 3.50; 4.47; 3.48	0	4515.02	14; 17; 20; 23	1.362e+06 - 3.528e+06	33.57 - 33.74	14; 17; 20; 23-10247	HexNAc(4)Hex(6)Fuc(2)NeuAc(1)
121.1	85206	33.7100	10247	sp|P01591|IGJ_HUMAN Immunoglobulin J chain OS=Homo sapiens OX=9606 GN=JCHAIN PE=1 SV=4	P01591	N	71	71	R.IIVPLNNREnISDPTSPLR.T	HexNAc(4)Hex(6)Fuc(2)NeuAc(1)	Uncertain			AR	a	4515.0303	NGlycan/2367.8457	1	a_hIgA-AR-GLTrFASP-FZpipHILIC_8mAbs_E2_step.raw_20240829_noglyc_spec_cut	203.3	0.38	33000000	2	33.74	4	10	62	80	0.79	203.3	203.3	1129.7649	1129.76	3.27	0	4515.02	14	3.53e+06	33.74	14-10247	HexNAc(4)Hex(6)Fuc(2)NeuAc(1)
121.2	101476	33.7000	11117	sp|P01591|IGJ_HUMAN Immunoglobulin J chain OS=Homo sapiens OX=9606 GN=JCHAIN PE=1 SV=4	P01591	N	71	71	R.IIVPLNNREnISDPTSPLR.T	HexNAc(4)Hex(6)Fuc(2)NeuAc(1)	Uncertain			AR	b	4515.0313	NGlycan/2367.8457	1	b_hIgA-AR-GLTrFASP-FZpipHILIC_11mAbs_E2_step.raw_20240829_noglyc_spec_cut	238.11	0.33	24000000	2	33.69	4	10	62	80	0.74	199.0	199.0	1129.7651	1129.76	3.50	0	4515.02	17	3.15e+06	33.69	17-11117	HexNAc(4)Hex(6)Fuc(2)NeuAc(1)
121.3	118378	33.5900	11185	sp|P01591|IGJ_HUMAN Immunoglobulin J chain OS=Homo sapiens OX=9606 GN=JCHAIN PE=1 SV=4	P01591	N	71	71	R.IIVPLNNREnISDPTSPLR.T	HexNAc(4)Hex(6)Fuc(2)NeuAc(1)	Uncertain			AR	c	4515.0332	NGlycan/2367.8457	1	c_hIgA-AR-GLTrFASP-FZpipHILIC_16mAbs_E2_step.raw_20240829_noglyc_spec_cut	291.46	0.0013	11300000	2	33.60	4	10	62	80	0.013	189.4	189.4	1129.7656	1129.76	3.91	0	4515.02	20	1.36e+06	33.60	20-11185	HexNAc(4)Hex(6)Fuc(2)NeuAc(1)
121.4	134222; 134226; 134250	33.5300; 33.5600; 33.7200	10552; 10561; 10623	sp|P01591|IGJ_HUMAN Immunoglobulin J chain OS=Homo sapiens OX=9606 GN=JCHAIN PE=1 SV=4	P01591	N	71	71	R.IIVPLNNREnISDPTSPLR.T	HexNAc(4)Hex(6)Fuc(2)NeuAc(1)	Uncertain			AR	d	4515.0313; 4515.0357; 4515.0312	NGlycan/2367.8457	1	d_hIgA-AR-GLTrFASP-FZpipHILIC_16mAbs_E2_step.raw_20240829_noglyc_spec_cut	185.32	3.70e-01 - 1.00e+00	24600000	2	33.57	4	10	62	80	7.67e-01 - 1.00e+00	10.0 - 185.3	10.0 - 185.3	1129.7651; 1129.7662; 1129.7651	1129.76	3.50; 4.47; 3.48	0	4515.02	23	3.31e+06	33.57	23-10552	HexNAc(4)Hex(6)Fuc(2)NeuAc(1)
121.4.2	134226	33.5600	10561	sp|P01591|IGJ_HUMAN Immunoglobulin J chain OS=Homo sapiens OX=9606 GN=JCHAIN PE=1 SV=4	P01591	N	71	71	R.IIVPLNNREnISDPTSPLR.T	HexNAc(4)Hex(6)Fuc(2)NeuAc(1)	Uncertain			AR	d	4515.0357	NGlycan/2367.8457	0	d_hIgA-AR-GLTrFASP-FZpipHILIC_16mAbs_E2_step.raw_20240829_noglyc_spec_cut	149.27	1	24600000	2	33.57	4	10	62	80	1	119.2	119.2	1129.7662	1129.76	4.47	0	4515.02	23	3.31e+06	33.57	23-10561	HexNAc(4)Hex(6)Fuc(2)NeuAc(1)
122	118376	33.5700	11179	sp|P01591|IGJ_HUMAN Immunoglobulin J chain OS=Homo sapiens OX=9606 GN=JCHAIN PE=1 SV=4	P01591	N,N	67,71	71	R.IIVPLnNREnISDPTSPLR.T	HexNAc(4)Hex(5)NeuAc(1)	Uncertain			AR	c	4061.8354	Deamidated/0.9840; NGlycan/1913.6770	1	c_hIgA-AR-GLTrFASP-FZpipHILIC_16mAbs_E2_step.raw_20240829_noglyc_spec_cut	242.92	0.0013	1740000	0	33.50	3	6,10	62	80	0.013	219.0	0.0	1354.9524	1354.95	1.11	-1	4061.83	20	2.47e+05	33.50	20-11179	HexNAc(4)Hex(5)NeuAc(1)
123	36698; 75294	43.9000; 43.8400	16353; 15285	sp|P53804|TTC3_HUMAN E3 ubiquitin-protein ligase TTC3 OS=Homo sapiens OX=9606 GN=TTC3 PE=1 SV=2	P53804	N,N	99,114	99	K.INIFWPLLFQHQnSSVISRLHPCVDANnSRASEINLK.K	HexNAc(5)Hex(5)NeuAc(1)	Uncertain			SA	c	6434.9485; 6434.9515	NGlycan/2116.7564; Deamidated/0.9840	2	c_hIgA-SA-GLTrFASP-FZpipHILIC_E1_step.raw_20240829_noglyc_spec_cut; a_hIgA-SA-GLTrFASP-FZpipHILIC_E1_step.raw_20240829_noglyc_spec_cut	292.65	9.94e-01 - 1.00e+00	0	0	43.67 - 43.73	5	13,28	87	123	9.94e-01 - 1.00e+00	14.0 - 28.7	0.4 - 3.6	1287.9970; 1287.9976	1288	-2.31; -1.84	1	6434.96	6; 12	0	43.67 - 43.73	6; 12-16353	HexNAc(5)Hex(5)NeuAc(1)
123.1	36698	43.9000	16353	sp|P53804|TTC3_HUMAN E3 ubiquitin-protein ligase TTC3 OS=Homo sapiens OX=9606 GN=TTC3 PE=1 SV=2	P53804	N,N	99,114	99	K.INIFWPLLFQHQnSSVISRLHPCVDANnSRASEINLK.K	HexNAc(5)Hex(5)NeuAc(1)	Uncertain			SA	c	6434.9485	NGlycan/2116.7564; Deamidated/0.9840	1	c_hIgA-SA-GLTrFASP-FZpipHILIC_E1_step.raw_20240829_noglyc_spec_cut	255.34	0.99	0	0	43.73	5	13,28	87	123	0.99	28.7	0.4	1287.9970	1288	-2.31	1	6434.96	6	0	43.73	6-16353	HexNAc(5)Hex(5)NeuAc(1)
123.2	75294	43.8400	15285	sp|P53804|TTC3_HUMAN E3 ubiquitin-protein ligase TTC3 OS=Homo sapiens OX=9606 GN=TTC3 PE=1 SV=2	P53804	N,N	99,114	99	K.INIFWPLLFQHQnSSVISRLHPCVDANnSRASEINLK.K	HexNAc(5)Hex(5)NeuAc(1)	Uncertain			SA	a	6434.9515	NGlycan/2116.7564; Deamidated/0.9840	1	a_hIgA-SA-GLTrFASP-FZpipHILIC_E1_step.raw_20240829_noglyc_spec_cut	292.65	1	0	0	43.67	5	13,28	87	123	1	14.0	3.6	1287.9976	1288	-1.84	1	6434.96	12	0	43.67	12-15285	HexNAc(5)Hex(5)NeuAc(1)
124	56018; 75090	41.6900; 41.6400	15509; 14427	sp|P01009|A1AT_HUMAN Alpha-1-antitrypsin OS=Homo sapiens OX=9606 GN=SERPINA1 PE=1 SV=3	P01009	N,M	70,87	70	K.ITPNLAEFAFSLYRQLAHQSnSTNIFFSPVSIATAFAmLSLGTK.A	HexNAc(4)Hex(5)NeuAc(1)	Uncertain			SA	d	6733.1786; 6733.1782	NGlycan/1913.6770; Oxidation/15.9949	2	d_hIgA-SA-GLTrFASP-FZpipHILIC_E1_step.raw_20240829_noglyc_spec_cut; a_hIgA-SA-GLTrFASP-FZpipHILIC_E1_step.raw_20240829_noglyc_spec_cut	308.91	3.93e-02 - 3.21e-01		3	41.60 - 41.70	6	21,38	50	93	4.65e-01 - 8.37e-01	23.4 - 59.5	5.6 - 59.5	1123.2037; 1123.2036	1123.2	4.93; 4.87	-1 - 0	6733.15	9; 12	1.517e+06 - 1.687e+06	41.60 - 41.70	9; 12-15509	HexNAc(4)Hex(5)NeuAc(1)
124.1	56018	41.6900	15509	sp|P01009|A1AT_HUMAN Alpha-1-antitrypsin OS=Homo sapiens OX=9606 GN=SERPINA1 PE=1 SV=3	P01009	N,M	70,87	70	K.ITPNLAEFAFSLYRQLAHQSnSTNIFFSPVSIATAFAmLSLGTK.A	HexNAc(4)Hex(5)NeuAc(1)	Uncertain			SA	d	6733.1786	NGlycan/1913.6770; Oxidation/15.9949	1	d_hIgA-SA-GLTrFASP-FZpipHILIC_E1_step.raw_20240829_noglyc_spec_cut	308.91	0.32	11600000	3	41.70	6	21,38	50	93	0.84	23.4	5.6	1123.2037	1123.2	4.93	0	6733.15	9	1.52e+06	41.70	9-15509	HexNAc(4)Hex(5)NeuAc(1)
124.2	75090	41.6400	14427	sp|P01009|A1AT_HUMAN Alpha-1-antitrypsin OS=Homo sapiens OX=9606 GN=SERPINA1 PE=1 SV=3	P01009	N,M	70,87	70	K.ITPNLAEFAFSLYRQLAHQSnSTNIFFSPVSIATAFAmLSLGTK.A	HexNAc(4)Hex(5)NeuAc(1)	Uncertain			SA	a	6733.1782	NGlycan/1913.6770; Oxidation/15.9949	1	a_hIgA-SA-GLTrFASP-FZpipHILIC_E1_step.raw_20240829_noglyc_spec_cut	300.45	0.039	17700000	3	41.60	6	21,38	50	93	0.47	59.5	59.5	1123.2036	1123.2	4.87	-1	6733.15	12	1.69e+06	41.60	12-14427	HexNAc(4)Hex(5)NeuAc(1)
125	36458; 36462; 36496	41.5300; 41.5600; 41.7900	15419; 15432; 15524	sp|P01009|A1AT_HUMAN Alpha-1-antitrypsin OS=Homo sapiens OX=9606 GN=SERPINA1 PE=1 SV=3	P01009	N,M	70,87	70	K.ITPNLAEFAFSLYRQLAHQSnSTNIFFSPVSIATAFAmLSLGTK.A	HexNAc(4)Hex(5)Fuc(2)	Uncertain			SA	c	6734.1899; 6734.1874; 6734.1898	NGlycan/1914.6974; Oxidation/15.9949	2	c_hIgA-SA-GLTrFASP-FZpipHILIC_E1_step.raw_20240829_noglyc_spec_cut	308.98	1.08e-01 - 9.83e-01	54600000	3	41.54	5	21,38	50	93	7.04e-01 - 9.99e-01	11.2 - 33.9	11.2 - 33.9	1347.8453; 1347.8448; 1347.8452	1347.84	3.58; 3.22; 3.56	-1	6734.17	6	2.41e+06	41.54	6-15419	HexNAc(4)Hex(5)Fuc(2)
125.1.2	36462	41.5600	15432	sp|P01009|A1AT_HUMAN Alpha-1-antitrypsin OS=Homo sapiens OX=9606 GN=SERPINA1 PE=1 SV=3	P01009	N,M	70,87	70	K.ITPNLAEFAFSLYRQLAHQSnSTNIFFSPVSIATAFAmLSLGTK.A	HexNAc(4)Hex(5)Fuc(2)	Uncertain			SA	c	6734.1874	NGlycan/1914.6974; Oxidation/15.9949	0	c_hIgA-SA-GLTrFASP-FZpipHILIC_E1_step.raw_20240829_noglyc_spec_cut	211.74	0.98	54600000	3	41.54	5	21,38	50	93	1	11.2	11.2	1347.8448	1347.84	3.22	-1	6734.17	6	2.41e+06	41.54	6-15432	HexNAc(4)Hex(5)Fuc(2)
125.1.3	36496	41.7900	15524	sp|P01009|A1AT_HUMAN Alpha-1-antitrypsin OS=Homo sapiens OX=9606 GN=SERPINA1 PE=1 SV=3	P01009	N,M	70,87	70	K.ITPNLAEFAFSLYRQLAHQSnSTNIFFSPVSIATAFAmLSLGTK.A	HexNAc(4)Hex(5)Fuc(2)	Uncertain			SA	c	6734.1898	NGlycan/1914.6974; Oxidation/15.9949	0	c_hIgA-SA-GLTrFASP-FZpipHILIC_E1_step.raw_20240829_noglyc_spec_cut	295.03	0.59	54600000	3	41.54	5	21,38	50	93	0.96	33.9	33.9	1347.8452	1347.84	3.56	-1	6734.17	6	2.41e+06	41.54	6-15524	HexNAc(4)Hex(5)Fuc(2)
126	36466; 56025; 75087	41.5700; 41.8300; 41.6200	15438; 15565; 14417	sp|P01009|A1AT_HUMAN Alpha-1-antitrypsin OS=Homo sapiens OX=9606 GN=SERPINA1 PE=1 SV=3	P01009	N,M	70,87	70	K.ITPNLAEFAFSLYRQLAHQSnSTNIFFSPVSIATAFAmLSLGTK.A	HexNAc(4)Hex(5)Fuc(2)	Uncertain			SA	c	6734.1965; 6734.2002; 6734.1919	NGlycan/1914.6974; Oxidation/15.9949	2	c_hIgA-SA-GLTrFASP-FZpipHILIC_E1_step.raw_20240829_noglyc_spec_cut; d_hIgA-SA-GLTrFASP-FZpipHILIC_E1_step.raw_20240829_noglyc_spec_cut; a_hIgA-SA-GLTrFASP-FZpipHILIC_E1_step.raw_20240829_noglyc_spec_cut	286.83	3.91e-02 - 9.25e-01		3	41.59 - 41.89	6	21,38	50	93	4.63e-01 - 9.93e-01	10.8 - 75.0	10.8 - 75.0	1123.3734; 1123.3740; 1123.3726	1123.37	4.56; 5.10; 3.87	-1 - 1	6734.17	6; 9; 12	1.454e+06 - 2.376e+06	41.59 - 41.89	6; 9; 12-15438	HexNAc(4)Hex(5)Fuc(2)
126.1	36466	41.5700	15438	sp|P01009|A1AT_HUMAN Alpha-1-antitrypsin OS=Homo sapiens OX=9606 GN=SERPINA1 PE=1 SV=3	P01009	N,M	70,87	70	K.ITPNLAEFAFSLYRQLAHQSnSTNIFFSPVSIATAFAmLSLGTK.A	HexNAc(4)Hex(5)Fuc(2)	Uncertain			SA	c	6734.1965	NGlycan/1914.6974; Oxidation/15.9949	1	c_hIgA-SA-GLTrFASP-FZpipHILIC_E1_step.raw_20240829_noglyc_spec_cut	244.9	0.6	15100000	3	41.59	6	21,38	50	93	0.97	10.8	10.8	1123.3734	1123.37	4.56	1	6734.17	6	2.28e+06	41.59	6-15438	HexNAc(4)Hex(5)Fuc(2)
126.2	56025	41.8300	15565	sp|P01009|A1AT_HUMAN Alpha-1-antitrypsin OS=Homo sapiens OX=9606 GN=SERPINA1 PE=1 SV=3	P01009	N,M	70,87	70	K.ITPNLAEFAFSLYRQLAHQSnSTNIFFSPVSIATAFAmLSLGTK.A	HexNAc(4)Hex(5)Fuc(2)	Uncertain			SA	d	6734.2002	NGlycan/1914.6974; Oxidation/15.9949	1	d_hIgA-SA-GLTrFASP-FZpipHILIC_E1_step.raw_20240829_noglyc_spec_cut	227.07	0.92	17700000	3	41.89	6	21,38	50	93	0.99	75.0	75.0	1123.3740	1123.37	5.10	-1	6734.17	9	1.45e+06	41.89	9-15565	HexNAc(4)Hex(5)Fuc(2)
126.3	75087	41.6200	14417	sp|P01009|A1AT_HUMAN Alpha-1-antitrypsin OS=Homo sapiens OX=9606 GN=SERPINA1 PE=1 SV=3	P01009	N,M	70,87	70	K.ITPNLAEFAFSLYRQLAHQSnSTNIFFSPVSIATAFAmLSLGTK.A	HexNAc(4)Hex(5)Fuc(2)	Uncertain			SA	a	6734.1919	NGlycan/1914.6974; Oxidation/15.9949	1	a_hIgA-SA-GLTrFASP-FZpipHILIC_E1_step.raw_20240829_noglyc_spec_cut	286.83	0.039	38400000	3	41.65	6	21,38	50	93	0.46	22.9	22.9	1123.3726	1123.37	3.87	-1	6734.17	12	2.38e+06	41.65	12-14417	HexNAc(4)Hex(5)Fuc(2)
127	124867	42.4100	13953	sp|P01042|KNG1_HUMAN Kininogen-1 OS=Homo sapiens OX=9606 GN=KNG1 PE=1 SV=2	P01042	N	205	205	R.ITYSIVQTnCSKENFLFLTPDCK.S	HexNAc(3)Hex(3)Fuc(1)	Uncertain			AR	c	4018.8004	NGlycan/1241.4545	1	c_hIgA-AR-GLTrFASP-FZpipHILIC_55mAbs_E1_step.raw_20240829_noglyc_spec_cut	107.43	1	5130000	2	42.34	3	9	197	219	1	71.8	71.8	1340.6074	1340.61	1.35	0	4018.79	21	6.71e+05	42.34	21-13953	HexNAc(3)Hex(3)Fuc(1)
128	105107	34.8300	11537	sp|Q14624|ITIH4_HUMAN Inter-alpha-trypsin inhibitor heavy chain H4 OS=Homo sapiens OX=9606 GN=ITIH4 PE=1 SV=4	Q14624	N,M	81,89	81	K.KAFITnFSMIIDGmTYPGIIK.E	HexNAc(4)Hex(5)Fuc(1)NeuAc(2)Sulfo(2)	Uncertain	SulfoHexNAc evidence		AR	b	4901.9402	NGlycan/2510.7440; Dioxidation/31.9898	1	b_hIgA-AR-GLTrFASP-FZpipHILIC_11mAbs_E2_step.raw_20240829_noglyc_spec_cut	116.28	0.41	8680000	2	34.87	4	6,14	76	96	0.41	42.2	15.7	1226.4923	1226.5	-5.23	1	4901.97	17	1.45e+06	34.87	17-11537	HexNAc(4)Hex(5)Fuc(1)NeuAc(2)Sulfo(2)
129	81857	42.7200	13777	sp|Q14624|ITIH4_HUMAN Inter-alpha-trypsin inhibitor heavy chain H4 OS=Homo sapiens OX=9606 GN=ITIH4 PE=1 SV=4	Q14624	N,M	81,89	81	K.KAFITnFSMIIDGmTYPGIIKEK.A	HexNAc(4)Hex(5)Fuc(2)	Uncertain			AR	d	4563.0769	NGlycan/1914.6974; Dioxidation/31.9898	1	d_hIgA-AR-GLTrFASP-FZpipHILIC_217mAbs-Dil1-5_D_step.raw_20240829_noglyc_spec_cut	127.35	0.93	21900000	2	42.89	4	6,14	76	98	0.93	19.8	2.9	1141.7765	1141.77	4.41	-1	4563.06	13	1.83e+06	42.89	13-13777	HexNAc(4)Hex(5)Fuc(2)
130	92763; 105983	43.0800; 42.7900	14077; 14013	sp|Q14624|ITIH4_HUMAN Inter-alpha-trypsin inhibitor heavy chain H4 OS=Homo sapiens OX=9606 GN=ITIH4 PE=1 SV=4	Q14624	N,M	81,89	81	K.KAFITnFSMIIDGmTYPGIIKEK.A	HexNAc(4)Hex(5)Fuc(2)	Uncertain			AR	a	4563.0738; 4563.0721	NGlycan/1914.6974; Dioxidation/31.9898	2	a_hIgA-AR-GLTrFASP-FZpipHILIC_39mAbs_E1_step.raw_20240829_noglyc_spec_cut; b_hIgA-AR-GLTrFASP-FZpipHILIC_47mAbs_E1_step.raw_20240829_noglyc_spec_cut	120.53	9.98e-01 - 9.99e-01		2	42.87 - 43.06	5	6,14	76	98	9.98e-01 - 1.00e+00	2.9 - 29.1	2.9 - 2.9	913.6220; 913.6217	913.619	3.73; 3.34	-1 - 0	4563.06	15; 18	1.154e+06 - 4.979e+06	42.87 - 43.06	15; 18-14077	HexNAc(4)Hex(5)Fuc(2)
130.1	105983	42.7900	14013	sp|Q14624|ITIH4_HUMAN Inter-alpha-trypsin inhibitor heavy chain H4 OS=Homo sapiens OX=9606 GN=ITIH4 PE=1 SV=4	Q14624	N,M	81,89	81	K.KAFITnFSMIIDGmTYPGIIKEK.A	HexNAc(4)Hex(5)Fuc(2)	Uncertain			AR	b	4563.0721	NGlycan/1914.6974; Dioxidation/31.9898	1	b_hIgA-AR-GLTrFASP-FZpipHILIC_47mAbs_E1_step.raw_20240829_noglyc_spec_cut	120.53	1	42100000	2	42.87	5	6,14	76	98	1	29.1	2.9	913.6217	913.619	3.34	0	4563.06	18	4.98e+06	42.87	18-14013	HexNAc(4)Hex(5)Fuc(2)
131	101393	33.0000	10854	sp|P02765|FETUA_HUMAN Alpha-2-HS-glycoprotein OS=Homo sapiens OX=9606 GN=AHSG PE=1 SV=2	P02765	N	156	156	R.KVCQDCPLLAPLnDTR.V	HexNAc(5)Hex(5)Fuc(1)NeuAc(1)	Uncertain			AR	b	4161.7377	NGlycan/2262.8143	1	b_hIgA-AR-GLTrFASP-FZpipHILIC_11mAbs_E2_step.raw_20240829_noglyc_spec_cut	125.41	1	29000000	2	33.01	3	13	144	159	1	11.8	11.8	1388.2532	1388.26	-2.61	-1	4161.75	17	2.01e+06	33.01	17-10854	HexNAc(5)Hex(5)Fuc(1)NeuAc(1)
132	118259	32.4500	10763	sp|P02765|FETUA_HUMAN Alpha-2-HS-glycoprotein OS=Homo sapiens OX=9606 GN=AHSG PE=1 SV=2	P02765	N	156	156	R.KVCQDCPLLAPLnDTR.V	HexNAc(4)Hex(5)Fuc(3)NeuAc(1)	Uncertain			AR	c	4250.7734	NGlycan/2351.8508	1	c_hIgA-AR-GLTrFASP-FZpipHILIC_16mAbs_E2_step.raw_20240829_noglyc_spec_cut	430.18	2.8e-05	26500000	2	32.61	3	13	144	159	0.00027	332.6	23.0	1417.9317	1417.94	-2.74	-1	4250.78	20	2.21e+06	32.61	20-10763	HexNAc(4)Hex(5)Fuc(3)NeuAc(1)
133	4006; 43935; 85574; 86027; 102243	42.2100; 44.1000; 36.5900; 41.0500; 40.8500	13572; 14784; 11298; 12886; 13690	sp|P02765|FETUA_HUMAN Alpha-2-HS-glycoprotein OS=Homo sapiens OX=9606 GN=AHSG PE=1 SV=2	P02765	N	156	156	R.KVCQDCPLLAPLnDTR.V	HexNAc(5)Hex(6)Fuc(3)NeuAc(2)	Uncertain			SA	a	4907.0240; 4907.0274; 4907.0091; 4907.0272; 4907.0275	NGlycan/3008.0784	2	a_hIgA-SA-GLTrFASP-FZpipHILIC_E2_step.raw_20240829_noglyc_spec_cut; c_hIgA-SA-GLTrFASP-FZpipHILIC_E2_step.raw_20240829_noglyc_spec_cut; a_hIgA-AR-GLTrFASP-FZpipHILIC_8mAbs_E2_step.raw_20240829_noglyc_spec_cut; b_hIgA-AR-GLTrFASP-FZpipHILIC_11mAbs_E2_step.raw_20240829_noglyc_spec_cut	119.33	9.45e-01 - 9.98e-01		2	36.81 - 44.01	4	13	144	159	9.45e-01 - 1.00e+00	0.3 - 111.2	0.3 - 15.7	1227.7633; 1227.7641; 1227.7596; 1227.7641; 1227.7641	1227.76	2.31; 3.01; -0.72; 2.97; 3.03	-1	4907.01	1; 7; 14; 17	9.196e+04 - 4.569e+06	36.81 - 44.01	1; 7; 14; 17-13572	HexNAc(5)Hex(6)Fuc(3)NeuAc(2)
133.1	85574; 86027	36.5900; 41.0500	11298; 12886	sp|P02765|FETUA_HUMAN Alpha-2-HS-glycoprotein OS=Homo sapiens OX=9606 GN=AHSG PE=1 SV=2	P02765	N	156	156	R.KVCQDCPLLAPLnDTR.V	HexNAc(5)Hex(6)Fuc(3)NeuAc(2)	Uncertain			AR	a	4907.0091; 4907.0272	NGlycan/3008.0784	1	a_hIgA-AR-GLTrFASP-FZpipHILIC_8mAbs_E2_step.raw_20240829_noglyc_spec_cut	119.33	9.86e-01 - 9.98e-01	154000000	2	36.81	4	13	144	159	9.98e-01 - 1.00e+00	15.7 - 111.2	9.8 - 15.7	1227.7596; 1227.7641	1227.76	-0.72; 2.97	-1	4907.01	14	4.57e+06	36.81	14-11298	HexNAc(5)Hex(6)Fuc(3)NeuAc(2)
134	85629; 134608	37.1300; 36.3700	11497; 11612	sp|P02765|FETUA_HUMAN Alpha-2-HS-glycoprotein OS=Homo sapiens OX=9606 GN=AHSG PE=1 SV=2	P02765	N	156	156	R.KVCQDCPLLAPLnDTR.V	HexNAc(7)Hex(8)NeuAc(1)	Uncertain			AR	a	4908.0043; 4908.0161	NGlycan/3009.0736	2	a_hIgA-AR-GLTrFASP-FZpipHILIC_8mAbs_E2_step.raw_20240829_noglyc_spec_cut; d_hIgA-AR-GLTrFASP-FZpipHILIC_16mAbs_E2_step.raw_20240829_noglyc_spec_cut	156.23	7.82e-01 - 9.98e-01		2	36.33 - 37.36	4	13	144	159	9.52e-01 - 1.00e+00	83.8 - 98.3	4.6 - 8.9	1228.0084; 1228.0113	1228.01	-0.72; 1.68	-1	4908.01	14; 23	1.368e+06 - 2.299e+06	36.33 - 37.36	14; 23-11497	HexNAc(7)Hex(8)NeuAc(1)
134.1	85629	37.1300	11497	sp|P02765|FETUA_HUMAN Alpha-2-HS-glycoprotein OS=Homo sapiens OX=9606 GN=AHSG PE=1 SV=2	P02765	N	156	156	R.KVCQDCPLLAPLnDTR.V	HexNAc(7)Hex(8)NeuAc(1)	Uncertain			AR	a	4908.0043	NGlycan/3009.0736	1	a_hIgA-AR-GLTrFASP-FZpipHILIC_8mAbs_E2_step.raw_20240829_noglyc_spec_cut	156.23	1	27900000	2	37.36	4	13	144	159	1	83.8	8.9	1228.0084	1228.01	-0.72	-1	4908.01	14	2.3e+06	37.36	14-11497	HexNAc(7)Hex(8)NeuAc(1)
134.2	134608	36.3700	11612	sp|P02765|FETUA_HUMAN Alpha-2-HS-glycoprotein OS=Homo sapiens OX=9606 GN=AHSG PE=1 SV=2	P02765	N	156	156	R.KVCQDCPLLAPLnDTR.V	HexNAc(7)Hex(8)NeuAc(1)	Uncertain			AR	d	4908.0161	NGlycan/3009.0736	1	d_hIgA-AR-GLTrFASP-FZpipHILIC_16mAbs_E2_step.raw_20240829_noglyc_spec_cut	133.79	0.78	11700000	2	36.33	4	13	144	159	0.95	98.3	4.6	1228.0113	1228.01	1.68	-1	4908.01	23	1.37e+06	36.33	23-11612	HexNAc(7)Hex(8)NeuAc(1)
135	85375	35.2000	10796	sp|P0DOX2|IGA2_HUMAN Immunoglobulin alpha-2 heavy chain OS=Homo sapiens OX=9606 PE=1 SV=2	P0DOX2	N,M	442,447	442	R.LAGKPTHInVSVVmAEADGTCY.-	HexNAc(4)Hex(5)Fuc(3)NeuAc(1)	Uncertain			AR	a	4699.9697	NGlycan/2351.8508; Oxidation/15.9949	1	a_hIgA-AR-GLTrFASP-FZpipHILIC_8mAbs_E2_step.raw_20240829_noglyc_spec_cut	149.85	0.29	33700000	2	35.03	4	9,14	434	455	0.72	25.8	1.3	1175.9997	1176	1.05	-1	4699.96	14	2.26e+06	35.03	14-10796	HexNAc(4)Hex(5)Fuc(3)NeuAc(1)
136	44626; 64129	25.1200; 25.1400	7753; 7834	sp|P01876|IGHA1_HUMAN Immunoglobulin heavy constant alpha 1_tailpiece.peptide	P01876	N	9	340	-.LAGKPTHVnVSVV.M	HexNAc(5)Hex(6)Fuc(3)NeuAc(1)	Uncertain			SA	c	4036.7283; 4036.7316	NGlycan/2716.9829	2	c_hIgA-SA-GLTrFASP-FZpipHILIC_E2_step.raw_20240829_noglyc_spec_cut; d_hIgA-SA-GLTrFASP-FZpipHILIC_E2_step.raw_20240829_noglyc_spec_cut	262.34	2.67e-04 - 7.98e-01		2	25.03 - 25.13	3	9	1	13	2.79e-04 - 8.05e-01	33.5 - 262.3	0.4 - 5.9	1346.5834; 1346.5845	1346.59	-2.67; -1.85	-1	4036.74	7; 10	5.360e+05 - 1.250e+06	25.03 - 25.13	7; 10-7753	HexNAc(5)Hex(6)Fuc(3)NeuAc(1)
136.1	44626	25.1200	7753	sp|P01876|IGHA1_HUMAN Immunoglobulin heavy constant alpha 1_tailpiece.peptide	P01876	N	9	340	-.LAGKPTHVnVSVV.M	HexNAc(5)Hex(6)Fuc(3)NeuAc(1)	Uncertain			SA	c	4036.7283	NGlycan/2716.9829	1	c_hIgA-SA-GLTrFASP-FZpipHILIC_E2_step.raw_20240829_noglyc_spec_cut	262.34	0.00027	4330000	2	25.13	3	9	1	13	0.00028	262.3	5.9	1346.5834	1346.59	-2.67	-1	4036.74	7	5.36e+05	25.13	7-7753	HexNAc(5)Hex(6)Fuc(3)NeuAc(1)
137	4764; 18350; 24477; 44503; 63981; 63991; 76530; 76533	21.0100; 20.9100; 20.8500; 20.8900; 20.8600; 21.0500; 20.9500; 21.0400	5536; 7213; 6047; 6180; 6204; 6276; 6373; 6406	sp|P01876|IGHA1_HUMAN Immunoglobulin heavy constant alpha 1_tailpiece.peptide	P01876	N	9	340	-.LAGKPTHVnVSVVM.A	HexNAc(5)Hex(5)NeuAc(2)	Uncertain			SA	a	3858.6515; 3858.6489; 3858.6482; 3858.6521; 3858.6538; 3858.6544; 3858.6484; 3858.6532	NGlycan/2407.8518	2	a_hIgA-SA-GLTrFASP-FZpipHILIC_E2_step.raw_20240829_noglyc_spec_cut; b_hIgA-SA-GLTrFASP-FZpipHILIC_E1_step.raw_20240829_noglyc_spec_cut; b_hIgA-SA-GLTrFASP-FZpipHILIC_E2_step.raw_20240829_noglyc_spec_cut; c_hIgA-SA-GLTrFASP-FZpipHILIC_E2_step.raw_20240829_noglyc_spec_cut; d_hIgA-SA-GLTrFASP-FZpipHILIC_E2_step.raw_20240829_noglyc_spec_cut; a_hIgA-SA-GLTrFASP-FZpipHILIC_E1_step.raw_20240829_noglyc_s…	194.84	7.31e-05 - 8.55e-03			20.90 - 21.08	3	9	1	14	7.64e-05 - 8.94e-03	30.0 - 194.8	30.0 - 194.8	1287.2244; 1287.2236; 1287.2233; 1287.2246; 1287.2252; 1287.2254; 1287.2234; 1287.2250	1287.22	0.80; 0.11; -0.06; 0.95; 1.39; 1.54; -0.01; 1.23	0	3858.65	1; 3; 4; 7; 10; 12	2.875e+06 - 9.482e+06	20.90 - 21.08	1; 3; 4; 7; 10; 12-5536	HexNAc(5)Hex(5)NeuAc(2)
137.1	4764	21.0100	5536	sp|P01876|IGHA1_HUMAN Immunoglobulin heavy constant alpha 1_tailpiece.peptide	P01876	N	9	340	-.LAGKPTHVnVSVVM.A	HexNAc(5)Hex(5)NeuAc(2)	Uncertain			SA	a	3858.6515	NGlycan/2407.8518	1	a_hIgA-SA-GLTrFASP-FZpipHILIC_E2_step.raw_20240829_noglyc_spec_cut	194.84	7.3e-05	64000000	2	21.08	3	9	1	14	7.6e-05	194.8	194.8	1287.2244	1287.22	0.80	0	3858.65	1	8.33e+06	21.08	1-5536	HexNAc(5)Hex(5)NeuAc(2)
137.2	18350	20.9100	7213	sp|P01876|IGHA1_HUMAN Immunoglobulin heavy constant alpha 1_tailpiece.peptide	P01876	N	9	340	-.LAGKPTHVnVSVVM.A	HexNAc(5)Hex(5)NeuAc(2)	Uncertain			SA	b	3858.6489	NGlycan/2407.8518	1	b_hIgA-SA-GLTrFASP-FZpipHILIC_E1_step.raw_20240829_noglyc_spec_cut	111.2	0.0042	14900000	0	20.90	3	9	1	14	0.0044	111.2	111.2	1287.2236	1287.22	0.11	0	3858.65	3	3.4e+06	20.90	3-7213	HexNAc(5)Hex(5)NeuAc(2)
137.3	24477	20.8500	6047	sp|P01876|IGHA1_HUMAN Immunoglobulin heavy constant alpha 1_tailpiece.peptide	P01876	N	9	340	-.LAGKPTHVnVSVVM.A	HexNAc(5)Hex(5)NeuAc(2)	Uncertain			SA	b	3858.6482	NGlycan/2407.8518	1	b_hIgA-SA-GLTrFASP-FZpipHILIC_E2_step.raw_20240829_noglyc_spec_cut	107.79	0.0021	63300000	2	20.92	3	9	1	14	0.0022	107.8	107.8	1287.2233	1287.22	-0.06	0	3858.65	4	7.7e+06	20.92	4-6047	HexNAc(5)Hex(5)NeuAc(2)
138	24747; 38277; 44759; 64254	28.0900; 28.3900; 28.1000; 28.0600	8768; 10282; 8874; 8962	sp|P01876|IGHA1_HUMAN Immunoglobulin heavy constant alpha 1_tailpiece.peptide	P01876	N	9	340	-.LAGKPTHVnVSVVM.A	HexNAc(5)Hex(6)Fuc(1)NeuAc(2)	True-positive	Replace N-glycan	HexNAc(5)Hex(6)Fuc(1)NeuAc(2)	SA	b	4167.7721; 4167.7729; 4167.7729; 4167.7698	NGlycan/2716.9829	2	b_hIgA-SA-GLTrFASP-FZpipHILIC_E2_step.raw_20240829_noglyc_spec_cut; c_hIgA-SA-GLTrFASP-FZpipHILIC_E1_step.raw_20240829_noglyc_spec_cut; c_hIgA-SA-GLTrFASP-FZpipHILIC_E2_step.raw_20240829_noglyc_spec_cut; d_hIgA-SA-GLTrFASP-FZpipHILIC_E2_step.raw_20240829_noglyc_spec_cut	434.78	1.54e-04 - 2.33e-02			28.11 - 28.28	3	9	1	14	1.61e-04 - 2.43e-02	129.9 - 352.3	1.2 - 10.3	1390.2647; 1390.2649; 1390.2649; 1390.2639	1390.27	-1.78; -1.59; -1.59; -2.34	-1	4167.78	4; 6; 7; 10	1.338e+06 - 8.534e+06	28.11 - 28.28	4; 6; 7; 10-8768	HexNAc(5)Hex(6)Fuc(3)NeuAc(1)
138.1	24747	28.0900	8768	sp|P01876|IGHA1_HUMAN Immunoglobulin heavy constant alpha 1_tailpiece.peptide	P01876	N	9	340	-.LAGKPTHVnVSVVM.A	HexNAc(5)Hex(6)Fuc(1)NeuAc(2)	True-positive	Replace N-glycan	HexNAc(5)Hex(6)Fuc(1)NeuAc(2)	SA	b	4167.7721	NGlycan/2716.9829	1	b_hIgA-SA-GLTrFASP-FZpipHILIC_E2_step.raw_20240829_noglyc_spec_cut	331.15	0.0027	11700000	2	28.12	3	9	1	14	0.0028	288.6	10.3	1390.2647	1390.27	-1.78	-1	4167.78	4	1.52e+06	28.12	4-8768	HexNAc(5)Hex(6)Fuc(3)NeuAc(1)
138.2	38277	28.3900	10282	sp|P01876|IGHA1_HUMAN Immunoglobulin heavy constant alpha 1_tailpiece.peptide	P01876	N	9	340	-.LAGKPTHVnVSVVM.A	HexNAc(5)Hex(6)Fuc(1)NeuAc(2)	True-positive	Replace N-glycan	HexNAc(5)Hex(6)Fuc(1)NeuAc(2)	SA	c	4167.7729	NGlycan/2716.9829	1	c_hIgA-SA-GLTrFASP-FZpipHILIC_E1_step.raw_20240829_noglyc_spec_cut	129.92	0.023	78300000	0	28.28	3	9	1	14	0.024	129.9	1.2	1390.2649	1390.27	-1.59	-1	4167.78	6	8.53e+06	28.28	6-10282	HexNAc(5)Hex(6)Fuc(3)NeuAc(1)
138.3	44759	28.1000	8874	sp|P01876|IGHA1_HUMAN Immunoglobulin heavy constant alpha 1_tailpiece.peptide	P01876	N	9	340	-.LAGKPTHVnVSVVM.A	HexNAc(5)Hex(6)Fuc(1)NeuAc(2)	True-positive	Replace N-glycan	HexNAc(5)Hex(6)Fuc(1)NeuAc(2)	SA	c	4167.7729	NGlycan/2716.9829	1	c_hIgA-SA-GLTrFASP-FZpipHILIC_E2_step.raw_20240829_noglyc_spec_cut	434.78	0.00023	8980000	2	28.11	3	9	1	14	0.00024	315.0	1.2	1390.2649	1390.27	-1.59	-1	4167.78	7	1.34e+06	28.11	7-8874	HexNAc(5)Hex(6)Fuc(3)NeuAc(1)
138.4	64254	28.0600	8962	sp|P01876|IGHA1_HUMAN Immunoglobulin heavy constant alpha 1_tailpiece.peptide	P01876	N	9	340	-.LAGKPTHVnVSVVM.A	HexNAc(5)Hex(6)Fuc(1)NeuAc(2)	True-positive	Replace N-glycan	HexNAc(5)Hex(6)Fuc(1)NeuAc(2)	SA	d	4167.7698	NGlycan/2716.9829	1	d_hIgA-SA-GLTrFASP-FZpipHILIC_E2_step.raw_20240829_noglyc_spec_cut	397.16	0.00015	31000000	2	28.13	3	9	1	14	0.00016	352.3	7.8	1390.2639	1390.27	-2.34	-1	4167.78	10	3.94e+06	28.13	10-8962	HexNAc(5)Hex(6)Fuc(3)NeuAc(1)
139	24762; 64276	28.3400; 28.3200	8862; 9063	sp|P01876|IGHA1_HUMAN Immunoglobulin heavy constant alpha 1_tailpiece.peptide	P01876	N	9	340	-.LAGKPTHVnVSVVM.A	HexNAc(5)Hex(6)Fuc(1)NeuAc(2)	True-positive	Replace N-glycan	HexNAc(5)Hex(6)Fuc(1)NeuAc(2)	SA	b	4167.7688; 4167.7682	NGlycan/2716.9829	2	b_hIgA-SA-GLTrFASP-FZpipHILIC_E2_step.raw_20240829_noglyc_spec_cut; d_hIgA-SA-GLTrFASP-FZpipHILIC_E2_step.raw_20240829_noglyc_spec_cut	363.76	3.08e-04 - 2.27e-03		2	28.31 - 28.34	4	9	1	14	3.22e-04 - 2.38e-03	272.1 - 363.8	2.6 - 3.2	1042.9495; 1042.9493	1042.95	-2.59; -2.73	-1	4167.78	4; 10	2.284e+06 - 2.560e+06	28.31 - 28.34	4; 10-8862	HexNAc(5)Hex(6)Fuc(3)NeuAc(1)
139.1	24762	28.3400	8862	sp|P01876|IGHA1_HUMAN Immunoglobulin heavy constant alpha 1_tailpiece.peptide	P01876	N	9	340	-.LAGKPTHVnVSVVM.A	HexNAc(5)Hex(6)Fuc(1)NeuAc(2)	True-positive	Replace N-glycan	HexNAc(5)Hex(6)Fuc(1)NeuAc(2)	SA	b	4167.7688	NGlycan/2716.9829	1	b_hIgA-SA-GLTrFASP-FZpipHILIC_E2_step.raw_20240829_noglyc_spec_cut	272.12	0.0023	10100000	2	28.31	4	9	1	14	0.0024	272.1	3.2	1042.9495	1042.95	-2.59	-1	4167.78	4	2.28e+06	28.31	4-8862	HexNAc(5)Hex(6)Fuc(3)NeuAc(1)
139.2	64276	28.3200	9063	sp|P01876|IGHA1_HUMAN Immunoglobulin heavy constant alpha 1_tailpiece.peptide	P01876	N	9	340	-.LAGKPTHVnVSVVM.A	HexNAc(5)Hex(6)Fuc(1)NeuAc(2)	True-positive	Replace N-glycan	HexNAc(5)Hex(6)Fuc(1)NeuAc(2)	SA	d	4167.7682	NGlycan/2716.9829	1	d_hIgA-SA-GLTrFASP-FZpipHILIC_E2_step.raw_20240829_noglyc_spec_cut	363.76	0.00031	24400000	2	28.34	4	9	1	14	0.00032	363.8	2.6	1042.9493	1042.95	-2.73	-1	4167.78	10	2.56e+06	28.34	10-9063	HexNAc(5)Hex(6)Fuc(3)NeuAc(1)
140	64475	32.3300	10614	sp|P01876|IGHA1_HUMAN Immunoglobulin heavy constant alpha 1_tailpiece.peptide	P01876	N	9	340	-.LAGKPTHVnVSVVM.A	HexNAc(5)Hex(6)Fuc(1)NeuAc(3)	Uncertain			SA	d	4457.8569	NGlycan/3007.0580	1	d_hIgA-SA-GLTrFASP-FZpipHILIC_E2_step.raw_20240829_noglyc_spec_cut	184.35	0.00013	20400000	2	32.29	3	9	1	14	0.00014	184.3	5.5	1486.9596	1486.96	0.52	1	4457.85	10	2.15e+06	32.29	10-10614	HexNAc(5)Hex(6)Fuc(1)NeuAc(3)
141	4913; 18387; 24611; 38207; 44628; 57404; 64128; 76563	25.3100; 25.0800; 25.1700; 25.1100; 25.1300; 25.1000	7156; 8822; 7660; 9012; 7772; 9066; 7831; 7972	sp|P01876|IGHA1_HUMAN Immunoglobulin heavy constant alpha 1_tailpiece.peptide	P01876	N,M	9,14	340	-.LAGKPTHVnVSVVm.A	HexNAc(5)Hex(3)Fuc(2)NeuAc(1)	Uncertain			SA	a	3551.5627; 3551.5622; 3551.5636; 3551.5609; 3551.5646; 3551.5635; 3551.5646; 3551.5620	NGlycan/2084.7666; Oxidation/15.9949	2	a_hIgA-SA-GLTrFASP-FZpipHILIC_E2_step.raw_20240829_noglyc_spec_cut; b_hIgA-SA-GLTrFASP-FZpipHILIC_E1_step.raw_20240829_noglyc_spec_cut; b_hIgA-SA-GLTrFASP-FZpipHILIC_E2_step.raw_20240829_noglyc_spec_cut; c_hIgA-SA-GLTrFASP-FZpipHILIC_E1_step.raw_20240829_noglyc_spec_cut; c_hIgA-SA-GLTrFASP-FZpipHILIC_E2_step.raw_20240829_noglyc_spec_cut; d_hIgA-SA-GLTrFASP-FZpipHILIC_E1_step.raw_20240829_noglyc_s…	212.6	5.42e-05 - 9.56e-02			25.11 - 25.35	3	9,14	1	14	5.67e-05 - 9.96e-02	30.0 - 212.6	30.0 - 212.6	1184.8615; 1184.8613; 1184.8618; 1184.8609; 1184.8621; 1184.8618; 1184.8621; 1184.8613	1184.86	1.30; 1.14; 1.55; 0.80; 1.82; 1.53; 1.83; 1.09	0	3551.56	1; 3; 4; 6; 7; 9; 10; 12	6.848e+05 - 5.731e+06	25.11 - 25.35	1; 3; 4; 6; 7; 9; 10; 12-7156	HexNAc(5)Hex(3)Fuc(2)NeuAc(1)
141.1	4913	25.3100	7156	sp|P01876|IGHA1_HUMAN Immunoglobulin heavy constant alpha 1_tailpiece.peptide	P01876	N,M	9,14	340	-.LAGKPTHVnVSVVm.A	HexNAc(5)Hex(3)Fuc(2)NeuAc(1)	Uncertain			SA	a	3551.5627	NGlycan/2084.7666; Oxidation/15.9949	1	a_hIgA-SA-GLTrFASP-FZpipHILIC_E2_step.raw_20240829_noglyc_spec_cut	212.6	6.3e-05	18300000	2	25.35	3	9,14	1	14	6.6e-05	212.6	212.6	1184.8615	1184.86	1.30	0	3551.56	1	1.89e+06	25.35	1-7156	HexNAc(5)Hex(3)Fuc(2)NeuAc(1)
141.2	18387	25.0800	8822	sp|P01876|IGHA1_HUMAN Immunoglobulin heavy constant alpha 1_tailpiece.peptide	P01876	N,M	9,14	340	-.LAGKPTHVnVSVVm.A	HexNAc(5)Hex(3)Fuc(2)NeuAc(1)	Uncertain			SA	b	3551.5622	NGlycan/2084.7666; Oxidation/15.9949	1	b_hIgA-SA-GLTrFASP-FZpipHILIC_E1_step.raw_20240829_noglyc_spec_cut	123.47	0.00031	38600000	0	25.15	3	9,14	1	14	0.00032	123.5	123.5	1184.8613	1184.86	1.14	0	3551.56	3	5.73e+06	25.15	3-8822	HexNAc(5)Hex(3)Fuc(2)NeuAc(1)
141.3	24611	25.1700	7660	sp|P01876|IGHA1_HUMAN Immunoglobulin heavy constant alpha 1_tailpiece.peptide	P01876	N,M	9,14	340	-.LAGKPTHVnVSVVm.A	HexNAc(5)Hex(3)Fuc(2)NeuAc(1)	Uncertain			SA	b	3551.5636	NGlycan/2084.7666; Oxidation/15.9949	1	b_hIgA-SA-GLTrFASP-FZpipHILIC_E2_step.raw_20240829_noglyc_spec_cut	142.1	0.00023	11600000	2	25.18	3	9,14	1	14	0.00024	142.1	142.1	1184.8618	1184.86	1.55	0	3551.56	4	1.45e+06	25.18	4-7660	HexNAc(5)Hex(3)Fuc(2)NeuAc(1)
141.4	38207	25.1100	9012	sp|P01876|IGHA1_HUMAN Immunoglobulin heavy constant alpha 1_tailpiece.peptide	P01876	N,M	9,14	340	-.LAGKPTHVnVSVVm.A	HexNAc(5)Hex(3)Fuc(2)NeuAc(1)	Uncertain			SA	c	3551.5609	NGlycan/2084.7666; Oxidation/15.9949	1	c_hIgA-SA-GLTrFASP-FZpipHILIC_E1_step.raw_20240829_noglyc_spec_cut	128	0.00063	26400000	0	25.12	3	9,14	1	14	0.00066	128.0	128.0	1184.8609	1184.86	0.80	0	3551.56	6	3.24e+06	25.12	6-9012	HexNAc(5)Hex(3)Fuc(2)NeuAc(1)
141.5	76563	25.1000	7972	sp|P01876|IGHA1_HUMAN Immunoglobulin heavy constant alpha 1_tailpiece.peptide	P01876	N,M	9,14	340	-.LAGKPTHVnVSVVm.A	HexNAc(5)Hex(3)Fuc(2)NeuAc(1)	Uncertain			SA	a	3551.5620	NGlycan/2084.7666; Oxidation/15.9949	1	a_hIgA-SA-GLTrFASP-FZpipHILIC_E1_step.raw_20240829_noglyc_spec_cut	138.94	5.4e-05	31200000	0	25.11	3	9,14	1	14	5.7e-05	138.9	138.9	1184.8613	1184.86	1.09	0	3551.56	12	4.39e+06	25.11	12-7972	HexNAc(5)Hex(3)Fuc(2)NeuAc(1)
142	4792; 64010	21.7200; 21.6500	5804; 6503	sp|P01876|IGHA1_HUMAN Immunoglobulin heavy constant alpha 1_tailpiece.peptide	P01876	N,M	9,14	340	-.LAGKPTHVnVSVVm.A	HexNAc(5)Hex(5)Fuc(1)NeuAc(1)	Uncertain			SA	a	3729.6137; 3729.6110	NGlycan/2262.8143; Oxidation/15.9949	2	a_hIgA-SA-GLTrFASP-FZpipHILIC_E2_step.raw_20240829_noglyc_spec_cut; d_hIgA-SA-GLTrFASP-FZpipHILIC_E2_step.raw_20240829_noglyc_spec_cut	225.34	1.55e-05 - 7.10e-02		2	21.61 - 21.69	4	9,14	1	14	1.62e-05 - 7.40e-02	30.0 - 225.3	30.0 - 225.3	933.4107; 933.4100	933.409	2.11; 1.37	0	3729.61	1; 10	8.322e+05 - 9.605e+05	21.61 - 21.69	1; 10-5804	HexNAc(5)Hex(5)Fuc(1)NeuAc(1)
142.1	4792	21.7200	5804	sp|P01876|IGHA1_HUMAN Immunoglobulin heavy constant alpha 1_tailpiece.peptide	P01876	N,M	9,14	340	-.LAGKPTHVnVSVVm.A	HexNAc(5)Hex(5)Fuc(1)NeuAc(1)	Uncertain			SA	a	3729.6137	NGlycan/2262.8143; Oxidation/15.9949	1	a_hIgA-SA-GLTrFASP-FZpipHILIC_E2_step.raw_20240829_noglyc_spec_cut	225.34	1.5e-05	4030000	2	21.69	4	9,14	1	14	1.6e-05	225.3	225.3	933.4107	933.409	2.11	0	3729.61	1	8.32e+05	21.69	1-5804	HexNAc(5)Hex(5)Fuc(1)NeuAc(1)
143	44600	24.3500	7470	sp|P01876|IGHA1_HUMAN Immunoglobulin heavy constant alpha 1_tailpiece.peptide	P01876	N,M	9,14	340	-.LAGKPTHVnVSVVm.A	HexNAc(5)Hex(6)Fuc(3)NeuAc(1)	Uncertain			SA	c	4183.7647	NGlycan/2716.9829; Oxidation/15.9949	1	c_hIgA-SA-GLTrFASP-FZpipHILIC_E2_step.raw_20240829_noglyc_spec_cut	225.43	0.0002	6170000	2	24.32	4	9,14	1	14	0.00021	225.4	1.8	1046.9485	1046.95	-2.33	-1	4183.77	7	5.84e+05	24.32	7-7470	HexNAc(5)Hex(6)Fuc(3)NeuAc(1)
144	25613; 45509; 137242	39.9300; 39.9000; 39.1400	13232; 13282; 12654	sp|P01876|IGHA1_HUMAN Immunoglobulin heavy constant alpha 1_tailpiece.peptide	P01876	N,M	9,14	340	-.LAGKPTHVnVSVVm.A	HexNAc(6)Hex(9)NeuAc(1)	Uncertain			SA	b	4450.8435; 4450.8469; 4450.8404	NGlycan/2968.0471; Dioxidation/31.9898	2	b_hIgA-SA-GLTrFASP-FZpipHILIC_E2_step.raw_20240829_noglyc_spec_cut; c_hIgA-SA-GLTrFASP-FZpipHILIC_E2_step.raw_20240829_noglyc_spec_cut; d_hIgA-AR-GLTrFASP-FZpipHILIC_16mAbs_E2_step.raw_20240829_noglyc_spec_cut	122.55	5.06e-03 - 2.20e-01		2	39.21 - 39.94	3	9,14	1	14	5.29e-03 - 2.28e-01	1.3 - 2.2	1.3 - 2.2	1484.6218; 1484.6229; 1484.6207	1484.62	2.23; 3.00; 1.55	1	4450.83	4; 7; 23	3.597e+05 - 1.323e+06	39.21 - 39.94	4; 7; 23-13232	HexNAc(6)Hex(9)NeuAc(1)
144.1	137242	39.1400	12654	sp|P01876|IGHA1_HUMAN Immunoglobulin heavy constant alpha 1_tailpiece.peptide	P01876	N,M	9,14	340	-.LAGKPTHVnVSVVm.A	HexNAc(6)Hex(9)NeuAc(1)	Uncertain			AR	d	4450.8404	NGlycan/2968.0471; Dioxidation/31.9898	1	d_hIgA-AR-GLTrFASP-FZpipHILIC_16mAbs_E2_step.raw_20240829_noglyc_spec_cut	122.55	0.0051	13300000	2	39.21	3	9,14	1	14	0.0053	1.3	1.3	1484.6207	1484.62	1.55	1	4450.83	23	1.32e+06	39.21	23-12654	HexNAc(6)Hex(9)NeuAc(1)
145	44639; 44642; 64142	25.3300; 25.3700; 25.3200	7830; 7845; 7903	sp|P01876|IGHA1_HUMAN Immunoglobulin heavy constant alpha 1_tailpiece.peptide	P01876	N,M	9,14	340	-.LAGKPTHVnVSVVmAE.V	HexNAc(4)Hex(5)Fuc(1)NeuAc(2)	True-positive	Replace N-glycan	HexNAc(4)Hex(5)Fuc(1)NeuAc(2)	SA	c	4018.7078; 4018.7093; 4018.7072	NGlycan/2351.8508; Oxidation/15.9949	2	c_hIgA-SA-GLTrFASP-FZpipHILIC_E2_step.raw_20240829_noglyc_spec_cut; d_hIgA-SA-GLTrFASP-FZpipHILIC_E2_step.raw_20240829_noglyc_spec_cut	393.95	5.04e-05 - 4.58e-03		2	25.31 - 25.33	3	9,14	1	16	5.26e-05 - 4.78e-03	205.2 - 268.8	6.9 - 10.5	1340.5765; 1340.5771; 1340.5763	1340.58	-3.54; -3.15; -3.69	-1 - 0	4018.72	7; 10	1.523e+06 - 1.954e+06	25.31 - 25.33	7; 10-7830	HexNAc(4)Hex(5)Fuc(3)NeuAc(1)
145.2	64142	25.3200	7903	sp|P01876|IGHA1_HUMAN Immunoglobulin heavy constant alpha 1_tailpiece.peptide	P01876	N,M	9,14	340	-.LAGKPTHVnVSVVmAE.V	HexNAc(4)Hex(5)Fuc(1)NeuAc(2)	True-positive	Replace N-glycan	HexNAc(4)Hex(5)Fuc(1)NeuAc(2)	SA	d	4018.7072	NGlycan/2351.8508; Oxidation/15.9949	1	d_hIgA-SA-GLTrFASP-FZpipHILIC_E2_step.raw_20240829_noglyc_spec_cut	393.95	0.00025	19500000	2	25.33	3	9,14	1	16	0.00027	268.8	8.9	1340.5763	1340.58	-3.69	-1	4018.72	10	1.95e+06	25.33	10-7903	HexNAc(4)Hex(5)Fuc(3)NeuAc(1)
146	5290; 5400; 5424; 5652; 5673; 5692; 5730; 18718; 18721; 18738; 18747; 24884; 25060; 25075; 25301; 25350; 25388; 31699; 38530; 38534; 38536; 38550; 38552; 45248; 45294; 45297; 57676; 57679; 57695; 64624; 64852; 64900; 76870; 76888; 87594; 103493; 103940; 126097; 136294; 136605; 136612; 136889; 136903; 143542	32.8500; 34.0800; 34.3200; 36.2600; 36.4200; 36.6000; 36.8700; 36.1100; 36.1700; 36.4800; 36.6900; 30.8100; 33.9400; 34.1300; 36.0900; 36.7700; 36.6400; 36.2300; 36.2800; 36.5000; 36.5200; 36.1000; 36.4900; 36.5100; 36.2100; 36.5500; 33.9200; 36.0700; 36.4500; 32.5600; 36.1400; 35.9700; 30.1300; 33.6400; 33.6800; 35.8300; 35.9000; 35.4900	10057; 10523; 10615; 11359; 11422; 11487; 11586; 13109; 13133; 13257; 13335; 9806; 10994; 11066; 11805; 11949; 12054; 12978; 13292; 13339; 13359; 13440; 13448; 11891; 12034; 12042; 13367; 13489; 11231; 12064; 12209; 12248; 12403; 10325; 10684; 12019; 11445; 9243; 10591; 10606; 11426; 11449; 11339	sp|P01876|IGHA1_HUMAN Immunoglobulin heavy constant alpha 1_tailpiece.peptide	P01876	N	9	340	-.LAGKPTHVnVSVVMAEVDG.T	HexNAc(7)Hex(8)NeuAc(1)	Uncertain			SA	a	4931.0600; 4931.0643; 4931.0602; 4931.0640; 4931.0660; 4931.0613; 4931.0677; 4931.0624; 4931.0655; 4931.0655; 4931.0700; 4931.0587; 4931.0640; 4931.0700; 4931.0651; 4931.0643; 4931.0621; 4931.0682; 4931.0666; 4931.0657; 4931.0672; 4931.0640; 4931.0654; 4931.0591; 4931.0596; 4931.0645; 4931.0652; 4931.0628; 4931.0662; 4931.0642; 4931.0641; 4931.0648; 4931.0677; 4931.0665; 4931.0671; 4931.0712; 493…	NGlycan/3009.0736	2	a_hIgA-SA-GLTrFASP-FZpipHILIC_E2_step.raw_20240829_noglyc_spec_cut; b_hIgA-SA-GLTrFASP-FZpipHILIC_E1_step.raw_20240829_noglyc_spec_cut; b_hIgA-SA-GLTrFASP-FZpipHILIC_E2_step.raw_20240829_noglyc_spec_cut; c_hIgA-SA-GLTrFASP-FZpipHILIC_D_step.raw_20240829_noglyc_spec_cut; c_hIgA-SA-GLTrFASP-FZpipHILIC_E1_step.raw_20240829_noglyc_spec_cut; c_hIgA-SA-GLTrFASP-FZpipHILIC_E2_step.raw_20240829_noglyc_sp…	132.76	1.15e-01 - 9.94e-01		2	33.89 - 36.71	4	9	1	19	1.19e-01 - 9.94e-01	0.0 - 132.8	0.5 - 30.0	1233.7723; 1233.7733; 1233.7723; 1233.7733; 1233.7738; 1233.7726; 1233.7742; 1233.7729; 1233.7736; 1233.7737; 1233.7748; 1233.7719; 1233.7733; 1233.7748; 1233.7735; 1233.7733; 1233.7728; 1233.7743; 1233.7739; 1233.7737; 1233.7741; 1233.7733; 1233.7736; 1233.7720; 1233.7722; 1233.7734; 1233.7736; 1233.7730; 1233.7738; 1233.7733; 1233.7733; 1233.7735; 1233.7742; 1233.7739; 1233.7740; 1233.7751; 123…	1233.77	-1.37; -0.51; -1.32; -0.57; -0.16; -1.10; 0.19; -0.88; -0.26; -0.25; 0.65; -1.64; -0.56; 0.66; -0.35; -0.51; -0.94; 0.29; -0.02; -0.20; 0.10; -0.57; -0.27; -1.56; -1.46; -0.47; -0.32; -0.81; -0.11; -0.53; -0.55; -0.39; 0.20; -0.05; 0.06; 0.90; -0.27; -0.65; -0.53; 0.35; 0.15; 0.03; 0.24; -0.64	-1 - 1	4931.07	1; 3; 4; 5; 6; 7; 9; 10; 12; 14; 17; 21; 23; 24	1.287e+06 - 6.485e+07	33.89 - 36.71	1; 3; 4; 5; 6; 7; 9; 10; 12; 14; 17; 21; 23; 24-10057	HexNAc(7)Hex(8)NeuAc(1)
146.1	5290; 5400; 5424; 5652; 5673; 5692; 5730	32.8500; 34.0800; 34.3200; 36.2600; 36.4200; 36.6000; 36.8700	10057; 10523; 10615; 11359; 11422; 11487; 11586	sp|P01876|IGHA1_HUMAN Immunoglobulin heavy constant alpha 1_tailpiece.peptide	P01876	N	9	340	-.LAGKPTHVnVSVVMAEVDG.T	HexNAc(7)Hex(8)NeuAc(1)	Uncertain			SA	a	4931.0600; 4931.0643; 4931.0602; 4931.0640; 4931.0660; 4931.0613; 4931.0677	NGlycan/3009.0736	1	a_hIgA-SA-GLTrFASP-FZpipHILIC_E2_step.raw_20240829_noglyc_spec_cut	132.76	1.62e-01 - 9.69e-01	151000000	2	36.71	4	9	1	19	1.69e-01 - 9.70e-01	0.0 - 132.8	6.0 - 11.7	1233.7723; 1233.7733; 1233.7723; 1233.7733; 1233.7738; 1233.7726; 1233.7742	1233.77	-1.37; -0.51; -1.32; -0.57; -0.16; -1.10; 0.19	-1 - 1	4931.07	1	5.47e+06	36.71	1-10057	HexNAc(7)Hex(8)NeuAc(1)
146.1.1	5692	36.6000	11487	sp|P01876|IGHA1_HUMAN Immunoglobulin heavy constant alpha 1_tailpiece.peptide	P01876	N	9	340	-.LAGKPTHVnVSVVMAEVDG.T	HexNAc(7)Hex(8)NeuAc(1)	Uncertain			SA	a	4931.0613	NGlycan/3009.0736	0	a_hIgA-SA-GLTrFASP-FZpipHILIC_E2_step.raw_20240829_noglyc_spec_cut	132.76	0.16	151000000	2	36.71	4	9	1	19	0.17	132.8	11.7	1233.7726	1233.77	-1.10	-1	4931.07	1	5.47e+06	36.71	1-11487	HexNAc(7)Hex(8)NeuAc(1)
146.2	126097	35.9700	11445	sp|P01876|IGHA1_HUMAN Immunoglobulin heavy constant alpha 1_tailpiece.peptide	P01876	N	9	340	-.LAGKPTHVnVSVVMAEVDG.T	HexNAc(7)Hex(8)NeuAc(1)	Uncertain			AR	c	4931.0636	NGlycan/3009.0736	1	c_hIgA-AR-GLTrFASP-FZpipHILIC_55mAbs_E1_step.raw_20240829_noglyc_spec_cut	114.94	0.96	23100000	2	35.98	4	9	1	19	0.97	114.9	8.0	1233.7732	1233.77	-0.65	-1	4931.07	21	4.12e+06	35.98	21-11445	HexNAc(7)Hex(8)NeuAc(1)
147	5296; 5507; 24965; 38457; 44962; 57615; 64523; 76804	32.9400; 35.2500; 32.7700; 34.8900; 32.8200; 35.1600; 32.7900; 35.1100	10092; 10973; 10552; 12813; 10666; 12949; 10793; 11864	sp|P01876|IGHA1_HUMAN Immunoglobulin heavy constant alpha 1_tailpiece.peptide	P01876	N	9	340	-.LAGKPTHVnVSVVMAEVDGT.C	HexNAc(4)Hex(5)Fuc(1)NeuAc(2)	True-positive	Replace N-glycan	HexNAc(4)Hex(5)Fuc(1)NeuAc(2)	SA	a	4374.8760; 4374.8783; 4374.8769; 4374.8970; 4374.8788; 4374.8796; 4374.8794; 4374.8825	NGlycan/2351.8508	2	a_hIgA-SA-GLTrFASP-FZpipHILIC_E2_step.raw_20240829_noglyc_spec_cut; b_hIgA-SA-GLTrFASP-FZpipHILIC_E2_step.raw_20240829_noglyc_spec_cut; c_hIgA-SA-GLTrFASP-FZpipHILIC_E1_step.raw_20240829_noglyc_spec_cut; c_hIgA-SA-GLTrFASP-FZpipHILIC_E2_step.raw_20240829_noglyc_spec_cut; d_hIgA-SA-GLTrFASP-FZpipHILIC_E1_step.raw_20240829_noglyc_spec_cut; d_hIgA-SA-GLTrFASP-FZpipHILIC_E2_step.raw_20240829_noglyc_s…	309.42	1.69e-03 - 8.82e-01		2	32.77 - 35.33	4	9	1	20	1.77e-03 - 8.87e-01	30.0 - 226.0	7.2 - 30.0	1094.7263; 1094.7269; 1094.7265; 1094.7315; 1094.7270; 1094.7272; 1094.7271; 1094.7279	1094.73	-3.56; -3.03; -3.34; 1.24; -2.92; -2.75; -2.79; -2.08	-1	4374.89	1; 4; 6; 7; 9; 10; 12	9.217e+05 - 7.699e+06	32.77 - 35.33	1; 4; 6; 7; 9; 10; 12-10092	HexNAc(4)Hex(5)Fuc(3)NeuAc(1)
147.1	5296; 5507	32.9400; 35.2500	10092; 10973	sp|P01876|IGHA1_HUMAN Immunoglobulin heavy constant alpha 1_tailpiece.peptide	P01876	N	9	340	-.LAGKPTHVnVSVVMAEVDGT.C	HexNAc(4)Hex(5)Fuc(1)NeuAc(2)	True-positive	Replace N-glycan	HexNAc(4)Hex(5)Fuc(1)NeuAc(2)	SA	a	4374.8760; 4374.8783	NGlycan/2351.8508	1	a_hIgA-SA-GLTrFASP-FZpipHILIC_E2_step.raw_20240829_noglyc_spec_cut	309.42	0.0017	79100000	2	35.33	4	9	1	20	0.0018	222.0 - 226.0	7.2 - 7.6	1094.7263; 1094.7269	1094.73	-3.56; -3.03	-1	4374.89	1	4.59e+06	35.33	1-10092	HexNAc(4)Hex(5)Fuc(3)NeuAc(1)
147.1.2	5507	35.2500	10973	sp|P01876|IGHA1_HUMAN Immunoglobulin heavy constant alpha 1_tailpiece.peptide	P01876	N	9	340	-.LAGKPTHVnVSVVMAEVDGT.C	HexNAc(4)Hex(5)Fuc(1)NeuAc(2)	True-positive	Replace N-glycan	HexNAc(4)Hex(5)Fuc(1)NeuAc(2)	SA	a	4374.8783	NGlycan/2351.8508	0	a_hIgA-SA-GLTrFASP-FZpipHILIC_E2_step.raw_20240829_noglyc_spec_cut	299.58	0.0017	79100000	2	35.33	4	9	1	20	0.0018	226.0	7.2	1094.7269	1094.73	-3.03	-1	4374.89	1	4.59e+06	35.33	1-10973	HexNAc(4)Hex(5)Fuc(3)NeuAc(1)
147.2	44962	32.8200	10666	sp|P01876|IGHA1_HUMAN Immunoglobulin heavy constant alpha 1_tailpiece.peptide	P01876	N	9	340	-.LAGKPTHVnVSVVMAEVDGT.C	HexNAc(4)Hex(5)Fuc(1)NeuAc(2)	True-positive	Replace N-glycan	HexNAc(4)Hex(5)Fuc(1)NeuAc(2)	SA	c	4374.8788	NGlycan/2351.8508	1	c_hIgA-SA-GLTrFASP-FZpipHILIC_E2_step.raw_20240829_noglyc_spec_cut	137.92	0.35	8470000	2	32.78	4	9	1	20	0.36	137.9	11.4	1094.7270	1094.73	-2.92	-1	4374.89	7	1.17e+06	32.78	7-10666	HexNAc(4)Hex(5)Fuc(3)NeuAc(1)
147.3	57615	35.1600	12949	sp|P01876|IGHA1_HUMAN Immunoglobulin heavy constant alpha 1_tailpiece.peptide	P01876	N	9	340	-.LAGKPTHVnVSVVMAEVDGT.C	HexNAc(4)Hex(5)Fuc(1)NeuAc(2)	True-positive	Replace N-glycan	HexNAc(4)Hex(5)Fuc(1)NeuAc(2)	SA	d	4374.8796	NGlycan/2351.8508	1	d_hIgA-SA-GLTrFASP-FZpipHILIC_E1_step.raw_20240829_noglyc_spec_cut	136.51	0.67	49500000	2	35.18	4	9	1	20	0.68	136.5	8.9	1094.7272	1094.73	-2.75	-1	4374.89	9	6.21e+06	35.18	9-12949	HexNAc(4)Hex(5)Fuc(3)NeuAc(1)
147.4	64523	32.7900	10793	sp|P01876|IGHA1_HUMAN Immunoglobulin heavy constant alpha 1_tailpiece.peptide	P01876	N	9	340	-.LAGKPTHVnVSVVMAEVDGT.C	HexNAc(4)Hex(5)Fuc(1)NeuAc(2)	True-positive	Replace N-glycan	HexNAc(4)Hex(5)Fuc(1)NeuAc(2)	SA	d	4374.8794	NGlycan/2351.8508	1	d_hIgA-SA-GLTrFASP-FZpipHILIC_E2_step.raw_20240829_noglyc_spec_cut	219.69	0.0088	21200000	2	32.77	4	9	1	20	0.0092	206.3	13.9	1094.7271	1094.73	-2.79	-1	4374.89	10	3.64e+06	32.77	10-10793	HexNAc(4)Hex(5)Fuc(3)NeuAc(1)
148	18768; 76928	37.3000; 37.4000	13578; 12759	sp|P01876|IGHA1_HUMAN Immunoglobulin heavy constant alpha 1_tailpiece.peptide	P01876	N,M	9,14	340	-.LAGKPTHVnVSVVmAEVDGT.C	HexNAc(5)Hex(6)	Uncertain			SA	b	4042.7483; 4042.7567	NGlycan/1987.7138; Dioxidation/31.9898	2	b_hIgA-SA-GLTrFASP-FZpipHILIC_E1_step.raw_20240829_noglyc_spec_cut; a_hIgA-SA-GLTrFASP-FZpipHILIC_E1_step.raw_20240829_noglyc_spec_cut	195.07	6.57e-04 - 9.22e-02		2	37.31 - 37.41	3	9,14	1	20	6.86e-04 - 9.60e-02	179.0 - 195.1	179.0 - 195.1	1348.5900; 1348.5928	1348.59	0.95; 3.03	-1 - 0	4042.74	3; 12	4.849e+06 - 6.436e+06	37.31 - 37.41	3; 12-13578	HexNAc(5)Hex(6)
148.1	18768	37.3000	13578	sp|P01876|IGHA1_HUMAN Immunoglobulin heavy constant alpha 1_tailpiece.peptide	P01876	N,M	9,14	340	-.LAGKPTHVnVSVVmAEVDGT.C	HexNAc(5)Hex(6)	Uncertain			SA	b	4042.7483	NGlycan/1987.7138; Dioxidation/31.9898	1	b_hIgA-SA-GLTrFASP-FZpipHILIC_E1_step.raw_20240829_noglyc_spec_cut	178.98	0.00066	14900000	2	37.31	3	9,14	1	20	0.00069	179.0	179.0	1348.5900	1348.59	0.95	0	4042.74	3	6.44e+06	37.31	3-13578	HexNAc(5)Hex(6)
148.2	76928	37.4000	12759	sp|P01876|IGHA1_HUMAN Immunoglobulin heavy constant alpha 1_tailpiece.peptide	P01876	N,M	9,14	340	-.LAGKPTHVnVSVVmAEVDGT.C	HexNAc(5)Hex(6)	Uncertain			SA	a	4042.7567	NGlycan/1987.7138; Dioxidation/31.9898	1	a_hIgA-SA-GLTrFASP-FZpipHILIC_E1_step.raw_20240829_noglyc_spec_cut	195.07	0.092	13300000	2	37.41	3	9,14	1	20	0.096	195.1	195.1	1348.5928	1348.59	3.03	-1	4042.74	12	4.85e+06	37.41	12-12759	HexNAc(5)Hex(6)
149	5497; 5577; 5580; 5657; 5767; 5782; 5785; 25189; 25408; 25422; 25427; 38575; 45174; 45256; 45340; 57716; 64855; 64954; 64956; 88007; 104053; 104066; 136884; 137028; 137043	35.1800; 35.8000; 35.8300; 36.3100; 37.3100; 37.4000; 37.4300; 35.4100; 37.1200; 37.2300; 37.2500; 37.1800; 35.6500; 36.1600; 37.1700; 37.2000; 36.0800; 37.1100; 37.1300; 37.2400; 37.1500; 35.8100; 36.8400; 36.9200	10946; 11182; 11192; 11378; 11758; 11793; 11804; 11546; 12185; 12228; 12238; 13710; 11723; 11911; 12285; 13749; 12069; 12465; 12472; 11537; 12376; 12412; 11416; 11798; 11830	sp|P01876|IGHA1_HUMAN Immunoglobulin heavy constant alpha 1_tailpiece.peptide	P01876	N,M	9,14	340	-.LAGKPTHVnVSVVmAEVDGT.C	HexNAc(6)Hex(7)NeuAc(3)	Uncertain			SA	a	5265.1851; 5265.1916; 5265.1897; 5265.1798; 5265.1737; 5265.1859; 5265.1821; 5265.1806; 5265.1739; 5265.1804; 5265.1795; 5265.1803; 5265.1903; 5265.1724; 5265.1782; 5265.1744; 5265.1778; 5265.1795; 5265.1839; 5265.1808; 5265.1874; 5265.1924; 5265.1714; 5265.1824; 5265.1778	NGlycan/3226.1323; Oxidation/15.9949	2	a_hIgA-SA-GLTrFASP-FZpipHILIC_E2_step.raw_20240829_noglyc_spec_cut; b_hIgA-SA-GLTrFASP-FZpipHILIC_E2_step.raw_20240829_noglyc_spec_cut; c_hIgA-SA-GLTrFASP-FZpipHILIC_E1_step.raw_20240829_noglyc_spec_cut; c_hIgA-SA-GLTrFASP-FZpipHILIC_E2_step.raw_20240829_noglyc_spec_cut; d_hIgA-SA-GLTrFASP-FZpipHILIC_E1_step.raw_20240829_noglyc_spec_cut; d_hIgA-SA-GLTrFASP-FZpipHILIC_E2_step.raw_20240829_noglyc_s…	139.52	7.34e-02 - 9.98e-01		3	36.95 - 37.36	4	9,14	1	20	7.65e-02 - 9.98e-01	0.0 - 139.5	0.0 - 139.5	1317.3036; 1317.3052; 1317.3047; 1317.3022; 1317.3007; 1317.3038; 1317.3028; 1317.3024; 1317.3007; 1317.3024; 1317.3021; 1317.3024; 1317.3049; 1317.3004; 1317.3018; 1317.3009; 1317.3017; 1317.3021; 1317.3033; 1317.3025; 1317.3041; 1317.3054; 1317.3001; 1317.3029; 1317.3017	1317.3	3.25; 4.49; 4.12; 2.24; 1.08; 3.41; 2.68; 2.40; 1.11; 2.36; 2.18; 2.34; 4.24; 0.84; 1.95; 1.21; 1.86; 2.18; 3.02; 2.44; 3.69; 4.63; 0.64; 2.74; 1.86	-1 - 0	5265.17	1; 4; 6; 7; 9; 10; 14; 17; 23	1.538e+06 - 8.709e+06	36.95 - 37.36	1; 4; 6; 7; 9; 10; 14; 17; 23-10946	HexNAc(6)Hex(7)NeuAc(3)
149.1	5497; 5577; 5580; 5657; 5767; 5782; 5785	35.1800; 35.8000; 35.8300; 36.3100; 37.3100; 37.4000; 37.4300	10946; 11182; 11192; 11378; 11758; 11793; 11804	sp|P01876|IGHA1_HUMAN Immunoglobulin heavy constant alpha 1_tailpiece.peptide	P01876	N,M	9,14	340	-.LAGKPTHVnVSVVmAEVDGT.C	HexNAc(6)Hex(7)NeuAc(3)	Uncertain			SA	a	5265.1851; 5265.1916; 5265.1897; 5265.1798; 5265.1737; 5265.1859; 5265.1821	NGlycan/3226.1323; Oxidation/15.9949	1	a_hIgA-SA-GLTrFASP-FZpipHILIC_E2_step.raw_20240829_noglyc_spec_cut	139.52	7.34e-02 - 9.90e-01	108000000	3	37.36	4	9,14	1	20	7.65e-02 - 9.91e-01	0.0 - 139.5	0.0 - 139.5	1317.3036; 1317.3052; 1317.3047; 1317.3022; 1317.3007; 1317.3038; 1317.3028	1317.3	3.25; 4.49; 4.12; 2.24; 1.08; 3.41; 2.68	-1 - 0	5265.17	1	7.82e+06	37.36	1-10946	HexNAc(6)Hex(7)NeuAc(3)
149.1.1	5577	35.8000	11182	sp|P01876|IGHA1_HUMAN Immunoglobulin heavy constant alpha 1_tailpiece.peptide	P01876	N,M	9,14	340	-.LAGKPTHVnVSVVmAEVDGT.C	HexNAc(6)Hex(7)NeuAc(3)	Uncertain			SA	a	5265.1916	NGlycan/3226.1323; Oxidation/15.9949	0	a_hIgA-SA-GLTrFASP-FZpipHILIC_E2_step.raw_20240829_noglyc_spec_cut	101.03	0.42	108000000	3	37.36	4	9,14	1	20	0.43	101.0	101.0	1317.3052	1317.3	4.49	-1	5265.17	1	7.82e+06	37.36	1-11182	HexNAc(6)Hex(7)NeuAc(3)
149.1.2	5580	35.8300	11192	sp|P01876|IGHA1_HUMAN Immunoglobulin heavy constant alpha 1_tailpiece.peptide	P01876	N,M	9,14	340	-.LAGKPTHVnVSVVmAEVDGT.C	HexNAc(6)Hex(7)NeuAc(3)	Uncertain			SA	a	5265.1897	NGlycan/3226.1323; Oxidation/15.9949	0	a_hIgA-SA-GLTrFASP-FZpipHILIC_E2_step.raw_20240829_noglyc_spec_cut	139.52	0.073	108000000	3	37.36	4	9,14	1	20	0.076	139.5	139.5	1317.3047	1317.3	4.12	-1	5265.17	1	7.82e+06	37.36	1-11192	HexNAc(6)Hex(7)NeuAc(3)
149.2	45174; 45256; 45340	35.6500; 36.1600; 37.1700	11723; 11911; 12285	sp|P01876|IGHA1_HUMAN Immunoglobulin heavy constant alpha 1_tailpiece.peptide	P01876	N,M	9,14	340	-.LAGKPTHVnVSVVmAEVDGT.C	HexNAc(6)Hex(7)NeuAc(3)	Uncertain			SA	c	5265.1903; 5265.1724; 5265.1782	NGlycan/3226.1323; Oxidation/15.9949	1	c_hIgA-SA-GLTrFASP-FZpipHILIC_E2_step.raw_20240829_noglyc_spec_cut	108.21	1.56e-01 - 6.77e-01	28900000	3	37.22	4	9,14	1	20	1.62e-01 - 6.86e-01	0.0 - 108.2	0.0 - 108.2	1317.3049; 1317.3004; 1317.3018	1317.3	4.24; 0.84; 1.95	-1 - 0	5265.17	7	1.54e+06	37.22	7-11723	HexNAc(6)Hex(7)NeuAc(3)
150	89393; 89395; 105469; 105470; 138609; 138610	45.7100; 45.7200; 45.6600; 45.6700; 45.9000; 45.9100	14520; 14523; 15368; 15370; 14977; 14980	sp|P01876|IGHA1_HUMAN Immunoglobulin heavy constant alpha 1_tailpiece.peptide	P01876	H,N	7,9	340	-.LAGKPThVnVSVVMAEVDGTC.Y	HexNAc(4)Hex(5)Fuc(1)NeuAc(2)Sulfo(2)	True-positive	Replace N-glycan,SulfoHexNAc evidence	HexNAc(4)Hex(5)Fuc(1)NeuAc(2)Sulfo(2)	AR	a	4710.8474; 4710.8474; 4710.8448; 4710.8448; 4710.8472; 4710.8472	Oxidation/15.9949; NGlycan/2511.7644	2	a_hIgA-AR-GLTrFASP-FZpipHILIC_8mAbs_E2_step.raw_20240829_noglyc_spec_cut; b_hIgA-AR-GLTrFASP-FZpipHILIC_11mAbs_E2_step.raw_20240829_noglyc_spec_cut; d_hIgA-AR-GLTrFASP-FZpipHILIC_16mAbs_E2_step.raw_20240829_noglyc_spec_cut	127.21	1.26e-03 - 1.07e-02		2	45.71 - 45.97	4	7,9	1	21	1.31e-03 - 1.12e-02	0.0 - 127.2	4.0 - 46.1	1178.7191; 1178.7191; 1178.7185; 1178.7185; 1178.7191; 1178.7191	1178.71	3.52; 3.52; 2.97; 2.97; 3.48; 3.48	0	4710.83	14; 17; 23	9.549e+05 - 1.267e+06	45.71 - 45.97	14; 17; 23-14520	HexNAc(4)Hex(5)Fuc(3)NeuAc(1)Sulfo(2)
150.1	89393; 89395	45.7100; 45.7200	14520; 14523	sp|P01876|IGHA1_HUMAN Immunoglobulin heavy constant alpha 1_tailpiece.peptide	P01876	H,N	7,9	340	-.LAGKPThVnVSVVMAEVDGTC.Y	HexNAc(4)Hex(5)Fuc(1)NeuAc(2)Sulfo(2)	True-positive	Replace N-glycan,SulfoHexNAc evidence	HexNAc(4)Hex(5)Fuc(1)NeuAc(2)Sulfo(2)	AR	a	4710.8474; 4710.8474	Oxidation/15.9949; NGlycan/2511.7644	1	a_hIgA-AR-GLTrFASP-FZpipHILIC_8mAbs_E2_step.raw_20240829_noglyc_spec_cut	113.34	1.26e-03 - 3.99e-03	8030000	2	45.78	4	7,9	1	21	1.31e-03 - 4.17e-03	3.7 - 113.3	4.0 - 46.1	1178.7191; 1178.7191	1178.71	3.52; 3.52	0	4710.83	14	9.55e+05	45.78	14-14520	HexNAc(4)Hex(5)Fuc(3)NeuAc(1)Sulfo(2)
150.1.1	89395	45.7200	14523	sp|P01876|IGHA1_HUMAN Immunoglobulin heavy constant alpha 1_tailpiece.peptide	P01876	H,N	7,9	340	-.LAGKPThVnVSVVMAEVDGTC.Y	HexNAc(4)Hex(5)Fuc(1)NeuAc(2)Sulfo(2)	True-positive	Replace N-glycan,SulfoHexNAc evidence	HexNAc(4)Hex(5)Fuc(1)NeuAc(2)Sulfo(2)	AR	a	4710.8474	Oxidation/15.9949; NGlycan/2511.7644	0	a_hIgA-AR-GLTrFASP-FZpipHILIC_8mAbs_E2_step.raw_20240829_noglyc_spec_cut	113.34	0.0013	8030000	2	45.78	4	7,9	1	21	0.0013	113.3	46.1	1178.7191	1178.71	3.52	0	4710.83	14	9.55e+05	45.78	14-14523	HexNAc(4)Hex(5)Fuc(3)NeuAc(1)Sulfo(2)
150.2	138609; 138610	45.9000; 45.9100	14977; 14980	sp|P01876|IGHA1_HUMAN Immunoglobulin heavy constant alpha 1_tailpiece.peptide	P01876	H,N	7,9	340	-.LAGKPThVnVSVVMAEVDGTC.Y	HexNAc(4)Hex(5)Fuc(1)NeuAc(2)Sulfo(2)	True-positive	Replace N-glycan,SulfoHexNAc evidence	HexNAc(4)Hex(5)Fuc(1)NeuAc(2)Sulfo(2)	AR	d	4710.8472; 4710.8472	Oxidation/15.9949; NGlycan/2511.7644	1	d_hIgA-AR-GLTrFASP-FZpipHILIC_16mAbs_E2_step.raw_20240829_noglyc_spec_cut	127.21	0.011	11900000	2	45.97	4	7,9	1	21	0.011	66.6 - 127.2	4.0 - 45.1	1178.7191; 1178.7191	1178.71	3.48; 3.48	0	4710.83	23	1.27e+06	45.97	23-14977	HexNAc(4)Hex(5)Fuc(3)NeuAc(1)Sulfo(2)
150.2.1	138610	45.9100	14980	sp|P01876|IGHA1_HUMAN Immunoglobulin heavy constant alpha 1_tailpiece.peptide	P01876	H,N	7,9	340	-.LAGKPThVnVSVVMAEVDGTC.Y	HexNAc(4)Hex(5)Fuc(1)NeuAc(2)Sulfo(2)	True-positive	Replace N-glycan,SulfoHexNAc evidence	HexNAc(4)Hex(5)Fuc(1)NeuAc(2)Sulfo(2)	AR	d	4710.8472	Oxidation/15.9949; NGlycan/2511.7644	0	d_hIgA-AR-GLTrFASP-FZpipHILIC_16mAbs_E2_step.raw_20240829_noglyc_spec_cut	127.21	0.011	11900000	2	45.97	4	7,9	1	21	0.011	127.2	45.1	1178.7191	1178.71	3.48	0	4710.83	23	1.27e+06	45.97	23-14980	HexNAc(4)Hex(5)Fuc(3)NeuAc(1)Sulfo(2)
151	4841; 4853; 11997; 18361; 18365; 18367; 24544; 24555; 31622; 38184; 38189; 44567; 57388; 57389; 64048; 64058; 64068; 76544; 76546; 87188; 87201; 103229; 136167; 136173	23.4000; 23.6900; 23.4200; 22.9900; 23.2600; 23.4700; 23.3100; 23.5800; 23.3400; 23.0200; 23.3000; 23.3200; 23.4600; 23.0000; 23.2700; 23.5400; 23.3700; 24.1600; 24.6300; 24.0500; 23.6500; 24.0200	6439; 6545; 8041; 8010; 8115; 8196; 6968; 7070; 7855; 8201; 8308; 7082; 8349; 8405; 7014; 7117; 7220; 7273; 7301; 6546; 6724; 7390; 6725; 6863	sp|P01876|IGHA1_HUMAN Immunoglobulin heavy constant alpha 1_tailpiece.peptide	P01876	N	9	340	-.LAGKPTHVnVSVVMAEVDGTC.Y	HexNAc(5)Hex(5)NeuAc(1)	Uncertain			SA	a	4299.8333; 4299.8289; 4299.8338; 4299.8366; 4299.8313; 4299.8299; 4299.8330; 4299.8343; 4299.8329; 4299.8330; 4299.8317; 4299.8302; 4299.8315; 4299.8306; 4299.8338; 4299.8317; 4299.8325; 4299.8293; 4299.8327; 4299.8329; 4299.8361; 4299.8350; 4299.8362; 4299.8347	NGlycan/2116.7564	2	a_hIgA-SA-GLTrFASP-FZpipHILIC_E2_step.raw_20240829_noglyc_spec_cut; b_hIgA-SA-GLTrFASP-FZpipHILIC_D_step.raw_20240829_noglyc_spec_cut; b_hIgA-SA-GLTrFASP-FZpipHILIC_E1_step.raw_20240829_noglyc_spec_cut; b_hIgA-SA-GLTrFASP-FZpipHILIC_E2_step.raw_20240829_noglyc_spec_cut; c_hIgA-SA-GLTrFASP-FZpipHILIC_D_step.raw_20240829_noglyc_spec_cut; c_hIgA-SA-GLTrFASP-FZpipHILIC_E1_step.raw_20240829_noglyc_spe…	136.88	2.23e-05 - 6.87e-02		2	23.23 - 24.69	4	9	1	21	2.33e-05 - 7.16e-02	0.0 - 134.6	1.1 - 36.1	1075.9656; 1075.9645; 1075.9657; 1075.9664; 1075.9651; 1075.9647; 1075.9655; 1075.9658; 1075.9655; 1075.9655; 1075.9652; 1075.9648; 1075.9652; 1075.9649; 1075.9657; 1075.9652; 1075.9654; 1075.9646; 1075.9654; 1075.9655; 1075.9663; 1075.9660; 1075.9663; 1075.9659	1075.96	1.25; 0.25; 1.39; 2.03; 0.80; 0.46; 1.19; 1.49; 1.16; 1.20; 0.88; 0.53; 0.85; 0.64; 1.37; 0.89; 1.08; 0.33; 1.12; 1.18; 1.92; 1.66; 1.94; 1.58	-1 - 1	4299.83	1; 2; 3; 4; 5; 6; 7; 9; 10; 12; 14; 17; 23	1.777e+06 - 2.890e+07	23.23 - 24.69	1; 2; 3; 4; 5; 6; 7; 9; 10; 12; 14; 17; 23-6439	HexNAc(5)Hex(5)NeuAc(1)
151.1	4841; 4853	23.4000; 23.6900	6439; 6545	sp|P01876|IGHA1_HUMAN Immunoglobulin heavy constant alpha 1_tailpiece.peptide	P01876	N	9	340	-.LAGKPTHVnVSVVMAEVDGTC.Y	HexNAc(5)Hex(5)NeuAc(1)	Uncertain			SA	a	4299.8333; 4299.8289	NGlycan/2116.7564	1	a_hIgA-SA-GLTrFASP-FZpipHILIC_E2_step.raw_20240829_noglyc_spec_cut	103.21	1.60e-04 - 1.48e-02	133000000	2	23.46	4	9	1	21	1.67e-04 - 1.54e-02	30.0 - 103.2	19.1 - 30.0	1075.9656; 1075.9645	1075.96	1.25; 0.25	0	4299.83	1	1.14e+07	23.46	1-6439	HexNAc(5)Hex(5)NeuAc(1)
151.2	24544; 24555	23.3100; 23.5800	6968; 7070	sp|P01876|IGHA1_HUMAN Immunoglobulin heavy constant alpha 1_tailpiece.peptide	P01876	N	9	340	-.LAGKPTHVnVSVVMAEVDGTC.Y	HexNAc(5)Hex(5)NeuAc(1)	Uncertain			SA	b	4299.8330; 4299.8343	NGlycan/2116.7564	1	b_hIgA-SA-GLTrFASP-FZpipHILIC_E2_step.raw_20240829_noglyc_spec_cut	126.16	2.11e-04 - 8.99e-03	106000000	2	23.35	4	9	1	21	2.20e-04 - 9.39e-03	41.7 - 120.5	28.0 - 34.3	1075.9655; 1075.9658	1075.96	1.19; 1.49	0	4299.83	4	9.19e+06	23.35	4-6968	HexNAc(5)Hex(5)NeuAc(1)
151.3	64048; 64058; 64068	23.0000; 23.2700; 23.5400	7014; 7117; 7220	sp|P01876|IGHA1_HUMAN Immunoglobulin heavy constant alpha 1_tailpiece.peptide	P01876	N	9	340	-.LAGKPTHVnVSVVMAEVDGTC.Y	HexNAc(5)Hex(5)NeuAc(1)	Uncertain			SA	d	4299.8338; 4299.8317; 4299.8325	NGlycan/2116.7564	1	d_hIgA-SA-GLTrFASP-FZpipHILIC_E2_step.raw_20240829_noglyc_spec_cut	136.88	2.23e-05 - 1.73e-03	312000000	2	23.33	4	9	1	21	2.33e-05 - 1.81e-03	30.0 - 134.6	28.0 - 35.8	1075.9657; 1075.9652; 1075.9654	1075.96	1.37; 0.89; 1.08	0	4299.83	10	2.24e+07	23.33	10-7014	HexNAc(5)Hex(5)NeuAc(1)
151.3.1	64058	23.2700	7117	sp|P01876|IGHA1_HUMAN Immunoglobulin heavy constant alpha 1_tailpiece.peptide	P01876	N	9	340	-.LAGKPTHVnVSVVMAEVDGTC.Y	HexNAc(5)Hex(5)NeuAc(1)	Uncertain			SA	d	4299.8317	NGlycan/2116.7564	0	d_hIgA-SA-GLTrFASP-FZpipHILIC_E2_step.raw_20240829_noglyc_spec_cut	136.88	2.2e-05	312000000	2	23.33	4	9	1	21	2.3e-05	134.6	35.8	1075.9652	1075.96	0.89	0	4299.83	10	2.24e+07	23.33	10-7117	HexNAc(5)Hex(5)NeuAc(1)
[truncated: 98,866 more rows]

## Sheet: sT4. IgA PeptideGroups
		Supplementary Table 4. Proteomic analysis from serum IgA samples from supplier 1 and supplier 2 performed by Proteome Discoverer.
[truncated: 4,688 more rows]
[truncated: 27 more columns]

## Sheet: sT5. IgA subclass abundance
	Supplementary Table 5. Relative abundance of IgA1 and IgA2 heavy chain constant regions by supplier sample.
7 A). Absolute sum of integrated peak area from the representative peptides of IgA1 and IgA2 subclasses in sample from supplier 1									7 A). Relative fraction of IgA subclasses in the human serum IgA sample from supplier 1
	Peptide sequence	Reference inner sequence *	Accession	a	b	c	d			Accession	a	b	c	d	Mean	SD
IgA1	NFPPSQDASGDLYTTSSQLTLPATQCLAGK	QCLAG	P01876	1.05311e+11	9.66917e+10	7.93161e+10	1.71246e+11		IgA1	P01876	0.860747	0.889508	0.90065	0.907107	0.889503	0.0205024
[truncated: 6 more rows]

## Sheet: sT6. Microhet IgA homolog Sup1
	Supplementary Table 6. Micro-heterogeneity of N-glycosylation in homologous sites of human IgA subclasses analyzed in sample from supplier 1. (A) homologous site at the CH2 domain: N144-IgA1/N131-IgA2m1/m2/n. (B) homologous site at the tailpiece: N340-IgA1/N327-IgA2m1/n (below). Human IgA1 heavy chain constant region is reported by UniProt with the accession number P01876. The gPSM bearing the ta…
[truncated: 149 more rows]

[truncated: 5 more sheets: sT7.Microhet IgA homolog Sup2, sT8.Microhet IgA2 uniq Sup1, sT9. Microhet IgA2 uniq Sup2, sT10. Sulfo-Glycoprot No Oxon, sT11. Sulfo-Glyco NoOxon Quant]
